# Supplementary material for: Alignment of Rutaceae Genomes Reveals Lower Genome Fractionation Level Than Eudicot Genomes Affected by Extra Polyploidization
Source: Front Plant Sci. 2019 Aug 6;10:986. doi: 10.3389/fpls.2019.00986 (PMC6691040; doi:10.3389/fpls.2019.00986)
Supplement: Supplementary file 2 [file Data_Sheet_2.xls]

## Sheet: Table S2
Supplementary Tables 2. Genes involved in Vitamin C biosynthetic pathways in Rutaceae plants and grape.
Gene families	Gene							Alignment length (in amino acids)
	Citrus sinensis	Citrus clementine	Citrus grandis	Citrus medica	Citrus ichangensis	Atalatia buxifolia	Vitis vinifera
Putative nucleobase-ascorbate transporter (AAT)	Cs2g04680.1 Cs2g20680.1 Cs5g05050.2 Cs7g08200.1 Cs3g24030.1 Cs8g04020.1 Cs8g04030.1	Ciclev10000777m Cc3g02571 Ciclev10000778m Cc7g02068 Ciclev10019678m Cc5g00408 Ciclev10019674m Ciclev10020213m Cc8g00299 Ciclev10028182m Ciclev10028179m Ciclev10028180m Cc8g00300 Cc2g01522 Cc2g02861	Cg2g019100 Cg8g002940 Cg8g002950 Cg3g021890 Cg7g019860 Cg5g004600 Cg2g043510	Cm3g065880 Cm7g076270 Cm8g092990 Cm8g093000 Cm2g102530 Cm5g134140 Cm2g243340 Cm298640 Cm8g305960	Ci2g041190 Ci7g044420 Ci5g115700 Ci3g127710 Ci2g131850 Ci8g263050	Ab5g10687 Ab7g15511 Ab21949 Ab21951 Ab2g24671 Ab2g28191 Ab8g29560 Ab8g29634 Ab33135 Ab3g35238	Vv17g01007809001 Vv18g01009328001 Vv18g01009577001 Vv01g01020164001 Vv10g01021237001 Vv12g01030497001 Vv03g01037811001	918
ATPase family AAA domain-containing protein (Alase)	Cs5g25020.1 Cs1g24220.2	Cc1g00267 Ciclev10025389m Cc5g02963	Cg5g029400 Cg1g004360	Cm1g016600 Cm5g079790	Ci5g030120 Ci2g157370	Ab1g15865 Ab5g36261	Vv04g01018945001 Vv16g01024407001	673
L-ascorbate oxidase (AO)	Cs2g29090.1 Cs1g01800.1	Cc1g02076 Cc2g00628	Cg1g028880 Cg1g028930 Cg2g005640	Cm2g162140 Cm1g206620 Cm282600 Cm290720	Ci2g031580 Ci1g156280 Ci1g161110 Ci1g161130	Ab2g17752 Ab1g23376 Ab1g23407	Vv07g01022165001 Vv07g01022168001 Vv07g01022169001 Vv07g01022172001 Vv07g01022180001 Vv07g01022181001 Vv06g01037479001	623
Putative L-ascorbate peroxidase (APX)	Cs3g19810.2 Cs6g04140.2 Cs1g25730.1 Cs8g02730.1 Cs8g17370.1	Cc3g02137 Ciclev10001462m Cc6g00452 Cc1g00113 Cc8g00162 Ciclev10029206m Ciclev10029440m Ciclev10029436m Cc8g01685	Cg8g021020 Cg8g001710 Cg3g016700 Cg6g002810 Cg1g001450	Cm6g007040 Cm3g022220 Cm1g173500 Cm8g182080 Cm8g237480	Ci6g076570 Ci3g092900 Ci1g105550 Ci8g183150 Ci6g205730 Ci8g224150	Ab1g15931 Ab8g26379 Ab8g34009 Ab3g35142 Ab6g36865 Ab7g37977	Vv18g01008846001 Vv04g01018740001 Vv04g01018743001 Vv03g01024035001 Vv06g01025104001 Vv08g01025551001	488
Putative glutathione S-transferase (DHAR)	Cs7g28340.1 Cs6g17520.1	Cc6g01693 Ciclev10032934m Cc7g00422	Cg6g018400 Cg7g005400	Cm6g050500 Cm7g154830	Ci6g084260 Ci7g123550	Ab6g19912 Ab7g24034	GSVIVT01005966001 Vv14g01030734001	267
Probable NAD(P)H-dependent oxidoreductase 1; Aldo-keto reductase family member (GalUR)	Cs5g20050.1 Cs5g20130.1 Cs5g20180.1 Cs5g20210.1 Cs7g07970.1 Cs3g01460.1 Cs6g09350.1 Cs1g07420.1 Cs9g14900.1 orange1.1t00001.2 orange1.1t01629.1 orange1.1t01634.1 orange1.1t01635.1 orange1.1t02573.1 orange1.1t03053.1 orange1.1t03054.1 orange1.1t03055.1 orange1.1t03058.1	Cc3g00045 Cc9g01833 Cc9g00994 Cc4g01176 Cc4g01080 Cc4g01081 Ciclev10009791m Cc6g00662 Cc6g00659 Ciclev10012383m Cc6g00897 Cc6g00661 Ciclev10012218m Cc6g00660 Ciclev10012587m Cc6g00664 Ciclev10013925m Cc7g02090 Cc7g00951 Ciclev10032387m Ciclev10032392m Ciclev10032407m Ciclev10032727m Cc5g01764 Cc5g01772 Cc2g01842 Cc2g01839 Cc2g01843	Cg6g009890 Cg4g016730 Cg5g020250 Cg5g020210 Cg4g009760 Cg4g010910 Cg2g028620 Cg9g015030 Cg9g023610 Cg6g005340 Cg6g005350 Cg6g005310 Cg6g005300 Cg6g005320 Cg7g020080 Cg7g010130 CgUng003890	Cm7g018360 Cm8g054800 Cm9g055770 Cm9g055780 Cm9g055800 Cm2g065210 Cm2g065240 Cm7g076490 Cm7g083040 Cm7g083050 Cm7g083060 Cm7g170570 Cm6g184300 Cm3g191460 Cm8g201980 Cm5g216460 Cm5g216510 Cm1g244460 Cm5g254180 Cm5g254200 Cm262890 Cm5g289020 Cm296480 Cm307810	Ci7g044660 Ci1g059140 Ci1g059180 Ci2g079340 Ci2g079350 Ci6g090280 Ci6g090290 Ci6g090300 Ci6g090310 Ci5g109780 Ci5g109830 Ci1g136090 Ci1g136100 Ci4g154410 Ci9g179960 Ci6g180340 Ci6g181060 Ci1g229320	Ab6g12980 Ab6g13005 Ab6g13087 Ab7g14944 Ab5g16443 Ab6g20882 Ab1g21462 Ab9g25642 Ab2g25781 Ab2g25783 Ab2g25804 Ab2g25883 Ab2g27391 Ab7g37348	Vv18g01009396001 Vv01g01011576001 Vv01g01011577001 Vv01g01011579001 Vv01g01011582001 Vv01g01011583001 Vv01g01011584001 Vv01g01011585001 Vv16g01014048001 Vv08g01030263001 Vv08g01034098001 Vv08g01034099001 Vv08g01034101001 Vv08g01034102001 Vv05g01035129001 Vv05g01035130001 Vv05g01035131001	1001
2,5-diketo-D-gluconic acid reductase (GalDH)	Cs8g03180.1	Cc8g00209	Cg8g002150	Cm8g173140	Ci8g181770	Ab8g20335	Vv03g01036958001	324
Putative GDP-L-fucose synthase (GER)	Cs4g02250.1	Cc4g02339	Cg4g023680	Cm4g008640	Ci4g268510	Ab4g27684	Vv11g01023706001	327
GDP-L-galactose phosphorylase (GGalPP)	Cs4g09870.2 Cs6g17580.1 orange1.1t06000.1	Cc9g01433 Cc4g01597 Cc6g01700	Cg4g012610 Cg6g018460 Cg9g019800	Cm6g050440 Cm4g068460 Cm1g112890	Ci6g084190 Ci4g097300	Ab6g19911 Ab4g30552	Vv14g01030833001 Vv19g01037703001	469
L-galactono-1,4-lactone dehydrogenase (GalLDH)	Cs2g26060.1 orange1.1t00763.1	Cc9g01527	Cg9g017240	Cm2g125270	Ci2g159760	Ab2g22315	Vv08g01033574001	610
Probable GDP-mannose 4,6-dehydratase (GMD)	Cs1g25150.1	Cc1g00180	Cg1g002210	Cm1g015720 Cm1g287380	Ci1g250930 Ci1g283270 Ci1g289280 Ci310950	Ab1g15874	Vv04g01018803001	376
GDP-mannose 3,5-epimerase (GME)	Cs3g10840.1 Cs8g02600.1 Cs8g02610.1	Cc3g01235 Cc9g00602	Cg9g006520 Cg3g010360	Cm9g067090 Cm3g127250	Ci3g082750 Ci3g082760 Ci9g140080 Ci311070	Ab3g20944 Ab9g24759 Ab9g24775	Vv05g01018081001 Vv14g01021793001	473
Probable mannose-1-phosphate guanylyltransferase (GMPase)	Cs7g31960.1 orange1.1t03049.2	Cc6g00657 Ciclev10012314m Cc7g00058	Cg6g005290 Cg7g000600	Cm7g083030 Cm7g117390	Ci7g011330 Ci6g090270	Ab6g13025 Ab16506 Ab7g20413	Vv13g01016470001	362
Probable mannose-1-phosphate guanylyltransferase (GalPP)	Cs2g02090.1	Cc2g00976 Cc2g01584 Cc2g03117 Cc2g03116 Ciclev10015987m Cc2g00970	Cg2g019780 Cg2g009220 Cg2g009260 Cg2g046090	Cm2g129300 Cm2g129330 Cm2g145260 Cm2g145270 Cm2g167220	Ci2g088370 Ci2g157750 Ci2g157760 Ci2g238390 Ci2g238410 Ci2g287530 Ci2g289840	Ab9g17441 Ab2g24596 Ab2g27043 Ab2g27076 Ab2g28015 Ab2g28100	Vv10g01006719001 Vv10g01006720001 Vv05g01017860001 Vv12g01030034001 Vv19g01037761001	889
L-gulono-1,4-lactone oxidase (GLOase)	Cs2g26060.1 orange1.1t00763.1	Cc9g01527	Cg9g017240	Cm2g125270	Ci2g159760	Ab2g22315	Vv08g01033574001	610
Probable inositol-3-phosphate synthase isozyme (IPS)	Cs1g01700.1	Cc1g02084 Ciclev10025545m	Cg1g029000	Cm1g206730	Ci1g161030	Ab1g23431	Vv07g01022158001	511
Probable monodehydroascorbate reductase (MDAR)	Cs2g27950.1 Cs5g03080.1 Cs6g15230.1	Cc6g01455 Cc5g00219 Ciclev10019891m Ciclev10020369m Ciclev10020363m Ciclev10020500m Cc2g00724 Ciclev10015733m Ciclev10015935m	Cg6g016020 Cg2g006690 Cg5g002210	Cm6g024100 Cm5g051330 Cm2g267970	Ci6g053130 Ci5g092470 Ci2g184980	Ab5g11147 Ab2g11446 Ab6g27553	Vv02g01019412001 Vv14g01032453001 Vv08g01033815001	572
Probable inositol oxygenase (MIOX)	Cs4g13120.1 Cs4g13140.1 Cs3g02580.1 Cs1g16030.1	Cc9g01089 Cc4g00845 Cc4g00844 Cc1g01071 Ciclev10026300m Ciclev10026418m Ciclev10026426m	Cg1g011960 Cg5g017150 Cg5g017160 Cg1g013560	Cm1g026750 Cm5g070520 Cm4g146460 Cm4g146470	Ci3g090720 Ci1g172280 Ci4g197090 Ci4g197100 Ci4g305220	Ab1g12181 Ab4g15579 Ab4g15638 Ab3g37845	Vv11g01015266001 Vv09g01016929001 Vv09g01016931001	396
Probable polygalacturonase; Endo-polygalacturonase (PG)	Cs4g05360.1 Cs4g07140.1 Cs5g02370.1 Cs5g03170.1 Cs1g09130.1 Cs9g03730.2 Cs9g19250.1 orange1.1t00402.1 orange1.1t01777.1	Cc3g00678 Cc9g00198 Ciclev10004943m Cc9g02133 Cc4g01863 Cc5g00225 Cc5g03917 Cc5g00145 Cc5g04148	Cg5g039320 Cg5g041660 Cg4g017760 Cg9g002040 Cg9g027490 Cg5g001470 Cg5g002280 CgUng021010	Cm9g027680 Cm1g032890 Cm9g035840 Cm5g051240 Cm5g052060 Cm1g081970 Cm1g082020 Cm1g082030 Cm1g082070 Cm1g082080 Cm1g082180 Cm1g204780 Cm1g204840 Cm4g220800 Cm9g229460	Ci1g000700 Ci3g020990 Ci9g055630 Ci5g061700 Ci4g086060 Ci5g092400 Ci9g138060 Ci1g154650 Ci1g154660 Ci1g154680	Ab5g10705 Ab5g10855 Ab9g17375 Ab9g21229 Ab4g30841 Ab1g31634 Ab33751 Ab36072	Vv11g01015044001 Vv02g01019405001 Vv02g01019516001 Vv04g01026477001 Vv15g01026985001 Vv07g01028057001 Vv07g01028246001 Vv16g01028859001 Vv16g01028860001 Vv16g01028861001 Vv05g01035089001	859
Glucose-6-phosphate isomerase (PGI)	Cs3g17430.1 Cs3g24700.1	Cc3g01899 Ciclev10000953m Cc3g02638	Cg3g022610 Cg3g014220	Cm3g098750 Cm3g150440 Cm3g280750 Cm3g286010	Ci3g082300 Ci3g226350 Ci3g307330	Ab3g14558 Ab3g35453	Vv18g01009147001 Vv18g01009697001	905
Putative pectinesterase/pectinesterase inhibitor (PME)	Cs4g06630.1 Cs4g06650.1 Cs4g06670.1 Cs4g06690.1 Cs4g06700.1 Cs4g06710.1 Cs2g07660.1 Cs2g17070.1 Cs5g23310.1 Cs5g33390.1 Cs5g33400.1 Cs5g33410.1 Cs5g33420.1 Cs5g33450.2 Cs3g06900.1 Cs3g06920.1 Cs3g14610.1 Cs3g14640.1 Cs3g14650.1 Cs1g05510.1 Cs1g16550.1 Cs1g16560.1 Cs9g14400.1 Cs9g14440.1 Cs9g14450.1 orange1.1t00214.1 orange1.1t00215.1 orange1.1t01921.1 orange1.1t02719.1	Cc3g01626 Cc3g01622 Ciclev10000435m Ciclev10000436m Ciclev10000446m Cc3g00216 Cc3g00206 Cc3g00210 Cc3g00921 Cc3g00920 Cc3g01625 Cc9g01883 Cc9g01882 Cc4g01915 Cc4g01912 Cc4g01909 Cc4g01910 Cc4g01911 Cc4g01913 Cc4g01917 Cc1g01040 Cc1g01802 Cc1g01039 Cc5g04339 Cc5g03748 Cc5g03755 Cc5g01317 Cc5g03749 Cc5g03751 Cc5g03750 Cc5g02779 Cc5g04340 Cc2g02547 Cc2g01948 Cc2g01389	Cg5g037630 Cg5g037690 Cg5g037640 Cg5g043560 Cg5g037660 Cg5g037650 Cg5g043550 Cg2g031920 Cg2g031870 Cg2g031930 Cg2g033370 Cg5g018160 Cg3g000850 Cg1g013240 Cg1g013250 Cg3g005010 Cg3g004990 Cg5g023750 Cg4g018260 Cg4g018320 Cg4g018240 Cg4g018270 Cg4g018300 Cg4g018230 Cg4g018220 Cg4g018280 Cg9g025150 Cg9g025100 Cg9g025110 Cg1g025470 Cg2g013570 Cg2g040360	Cm5g074930 Cm2g079300 Cm5g079930 Cm2g107880 Cm3g112470 Cm4g125780 Cm4g125790 Cm4g125810 Cm4g125830 Cm9g193630 Cm9g193640 Cm3g209950 Cm3g210000 Cm3g210010 Cm5g216790 Cm5g235990 Cm5g236030 Cm5g236040 Cm5g236050 Cm1g247710 Cm1g247720 Cm5g306780	Ci1g002620 Ci1g002640 Ci5g048270 Ci5g048280 Ci5g048290 Ci5g048300 Ci5g048310 Ci5g048320 Ci5g048340 Ci2g079720 Ci2g080660 Ci4g086510 Ci4g086520 Ci4g086530 Ci4g086540 Ci4g086550 Ci4g086560 Ci4g086570 Ci4g086580 Ci4g086600 Ci1g103930 Ci3g166530 Ci3g166540 Ci3g166580 Ci3g166590 Ci1g172550 Ci1g172560 Ci184500 Ci8g202850 Ci5g221720 Ci5g221730 Ci5g242000 Ci9g251720 Ci9g251730 Ci2g253910 Ci3g263500 Ci5g2…	Ab3g10496 Ab3g14325 Ab3g14330 Ab3g14395 Ab2g16544 Ab5g17814 Ab5g18027 Ab5g18083 Ab5g18298 Ab5g18359 Ab5g18489 Ab19116 Ab2g19714 Ab5g21370 Ab5g23000 Ab3g23072 Ab3g23077 Ab9g25600 Ab9g25681 Ab4g29451 Ab4g29520 Ab4g30343 Ab1g33304 Ab4g35879 Ab4g36017 Ab4g36018 Ab4g36037 Ab4g36064 Ab8g37142	Vv01g01011699001 Vv10g01012639001 Vv11g01014999001 Vv11g01015000001 Vv11g01015019001 Vv09g01016667001 Vv05g01017687001 Vv16g01018620001 Vv16g01018622001 Vv12g01023135001 Vv04g01026518001 Vv13g01027356001 Vv13g01027359001 Vv15g01027652001 Vv15g01027653001 Vv07g01028040001 Vv07g01028041001 Vv07g01028264001 Vv07g01028265001 Vv14g01031164001 Vv14g01031165001 Vv14g01031323001 Vv05g01031667001 Vv05g010…	2226
Probable mannose-6-phosphate isomerase; Mannose-6-phosphate isomerase (PMI)	Cs2g12720.1 Cs6g18580.1	Cc6g01812 Cc2g02126	Cg6g019480 Cg2g036120	Cm2g210370 Cm6g249960	Ci2g131000 Ci6g199620	Ab6g20168 Ab2g23520	Vv01g01011870001 Vv14g01031017001	453
Probable phosphomannomutase (PMM)	orange1.1t00331.1	Cc5g04218	Cg5g042400	Cm226580	Ci1g001460	Ab4g30519	Vv15g01026838001	283
Above genes related to the Vitamin C pathway were seperated into 23 subfamilies; The genes marked with bold font for they are related to ECH (core-eudicot common hexaploidy);The red font genes represented the related subfamilies shared these genes in the pathway.

## Sheet: Table S5
Supplementary Tables 5. Multiple genome alignment table of grape and Rutaceae plants
Collinear Genes 1							Collinear Genes 2							Collinear Genes 3
Vv01g01012261001	Cs7g11920	.	.	Ci7g037290	.	Ab7g34236	.	.	.	.	.	.	.	.	.	.	.	.	.	.
Vv01g01001329001	.	.	.	.	.	.	.	.	.	.	.	.	.	.	.	.	.	.	.	.
Vv01g01012259001	Cs2g12060	Cc7g01698	Cx7g015870	Ci2g073030	.	Ab2g23582	.	.	.	.	.	.	.	Vv17g01007847001	.	Cc5g00381	Cx5g004330	.	.	.
Vv01g01012258001	.	.	.	.	.	.	.	.	.	.	.	.	.	.	.	.	.	.	.	.
Vv01g01012257001	Cs7g11900	Cc7g01700	Cx7g015880	Ci7g037260	.	Ab7g34196	.	.	.	.	.	.	.	.	.	.	.	.	.	.
Vv01g01012255001	Cs7g11840	Cc7g01707	Cx7g015950	Ci7g037190	.	Ab7g34272	.	.	.	.	.	.	.	.	.	.	.	.	.	.
Vv01g01012253001	Cs7g11830	Cc7g01708	Cx7g015990	Ci7g037170	.	Ab7g34208	.	.	.	.	.	.	.	Vv17g01008141001	Cs5g12300	Cc5g01117	Cx5g011750	.	.	.
Vv01g01012252001	.	.	.	.	.	.	Vv14g01036545001	.	.	.	.	.	.	.	.	.	.	.	.	.
Vv01g01012250001	Cs7g11810	Cc7g01710	Cx7g016010	Ci7g037150	.	Ab7g15411	.	.	.	.	.	.	.	.	.	.	.	.	.	.
Vv01g01012249001	Cs7g11800	Cc7g01711	Cx7g016020	Ci7g037140	.	Ab7g14935	.	.	.	.	.	.	.	.	.	.	.	.	.	.
Vv01g01012248001	.	.	.	.	.	.	.	.	.	.	.	.	.	.	.	.	.	.	.	.
Vv01g01012247001	Cs7g11770	Cc7g01713	Cx7g016050	Ci7g037120	.	Ab7g15487	.	.	.	.	.	.	.	Vv17g01008556001	Cs7g10830	Cc5g01114	Cx5g011720	Ci7g036090	Cm7g174130	Ab7g37245
Vv01g01012246001	Cs7g11750	Cc7g01715	Cx7g016070	Ci7g037100	.	Ab7g34314	.	.	.	.	.	.	.	.	.	.	.	.	.	.
Vv01g01012245001	Cs7g11740	Cc7g01716	Cx7g016090	Ci7g037080	Cm7g289830	Ab7g34163	.	.	.	.	.	.	.	.	.	.	.	.	.	.
Vv01g01012244001	Cs7g11730	Cc7g02289	Cx7g021990	Ci7g037070	.	Ab7g34227	Vv14g01011510001	Cs6g22080	Cc6g02150	Cx6g025690	Ci6g076780	Cm6g164330	Ab6g13736	Vv17g01008133001	Cs5g12250	Cc5g01113	Cx5g011710	Ci5g285370	.	.
Vv01g01012243001	Cs7g11720	.	.	.	.	Ab7g34268	.	.	.	.	.	.	.	.	.	.	.	.	.	.
Vv01g01012242001	.	.	.	.	.	.	.	.	.	.	.	.	.	.	.	.	.	.	.	.
Vv01g01012241001	.	.	.	.	.	.	.	.	.	.	.	.	.	.	.	.	.	.	.	.
Vv01g01012240001	.	Cc7g01718	Cx7g016110	.	.	.	.	.	.	.	.	.	.	.	.	.	.	.	.	.
Vv01g01012239001	Cs7g11710	Cc7g01720	Cx7g016130	Ci7g037030	.	Ab7g34286	.	.	.	.	.	.	.	.	.	.	.	.	.	.
Vv01g01001332001	.	.	.	.	.	.	.	.	.	.	.	.	.	.	.	.	.	.	.	.
Vv01g01012238001	Cs7g11690	Cc7g01722	Cx7g016150	Ci7g037010	.	Ab7g34234	.	.	.	.	.	.	.	.	.	.	.	.	.	.
Vv01g01012237001	Cs7g11680	Cc7g01723	Cx7g016160	Ci7g037000	.	Ab7g34161	.	.	.	.	.	.	.	.	.	.	.	.	.	.
Vv01g01012236001	Cs7g11670	Cc7g01724	Cx7g016170	Ci7g036990	.	Ab7g34177	.	.	.	.	.	.	.	.	.	.	.	.	.	.
Vv01g01001333001	.	.	.	.	.	.	.	.	.	.	.	.	.	.	.	.	.	.	.	.
Vv01g01001334001	.	.	.	.	.	.	.	.	.	.	.	.	.	.	.	.	.	.	.	.
Vv01g01012235001	.	.	.	.	.	.	.	.	.	.	.	.	.	.	.	.	.	.	.	.
Vv01g01012234001	.	.	.	.	.	.	.	.	.	.	.	.	.	.	.	.	.	.	.	.
Vv01g01012233001	.	.	.	.	.	.	.	.	.	.	.	.	.	.	.	.	.	.	.	.
Vv01g01012232001	.	.	.	.	.	.	.	.	.	.	.	.	.	.	.	.	.	.	.	.
Vv01g01012231001	.	.	.	.	.	.	.	.	.	.	.	.	.	.	.	.	.	.	.	.
Vv01g01012230001	Cs7g11620	Cc7g01730	Cx7g016220	Ci7g036920	.	Ab7g34221	Vv14g01032901001	Cs6g22350	.	Cx8g014240	Ci6g076480	Cm6g263490	Ab6g13815	Vv17g01008116001	Cs7g11620	.	.	Ci7g036920	.	Ab7g34221
Vv01g01012229001	Cs7g11610	Cc7g01731	Cx7g016230	Ci7g036910	.	Ab7g34191	.	.	.	.	.	.	.	.	.	.	.	.	.	.
Vv01g01012228001	Cs7g11580	Cc7g01734	Cx7g016260	Ci7g036840	.	Ab7g34180	.	.	.	.	.	.	.	.	.	.	.	.	.	.
Vv01g01012227001	Cs7g11570	Cc7g01735	Cx7g016270	Ci7g036830	.	Ab7g34326	.	.	.	.	.	.	.	Vv17g01008107001	Cs5g12050	Cc5g01093	Cx5g011540	.	.	Ab5g10641
Vv01g01012226001	.	.	.	.	.	.	.	.	.	.	.	.	.	.	.	.	.	.	.	.
Vv01g01012225001	Cs7g11560	Cc7g01736	Cx7g016280	Ci7g036820	.	Ab7g34398	Vv14g01032909001	.	Cc6g02170	.	.	.	.	Vv17g01008104001	Cs5g12000	Cc5g01089	Cx5g011490	.	Cm5g255000	Ab5g10649
Vv01g01012224001	.	.	.	.	.	.	.	.	.	.	.	.	.	.	.	.	.	.	.	.
Vv01g01001337001	.	.	.	.	.	.	.	.	.	.	.	.	.	.	.	.	.	.	.	.
Vv01g01012223001	Cs7g11540	Cc7g01738	Cx7g016300	Ci7g036800	.	Ab7g34249	.	.	.	.	.	.	.	Vv17g01007850001	Cs5g11970	Cc5g01086	Cx5g011460	.	Cm5g254970	Ab5g10672
Vv01g01012222001	Cs7g11510	Cc7g01739	Cx7g016310	.	.	Ab7g34318	.	.	.	.	.	.	.	.	.	.	.	.	.	.
Vv01g01012221001	.	Cc7g01740	.	.	.	.	.	.	.	.	.	.	.	Vv17g01007866001	Cs5g11920	Cc5g01083	Cx5g011410	.	Cm5g254920	Ab5g10652
Vv01g01012220001	Cs7g11500	Cc7g01741	Cx7g016330	Ci7g036770	.	.	.	.	.	.	.	.	.	Vv17g01008541001	.	.	.	.	.	.
Vv01g01001339001	.	.	.	.	.	.	.	.	.	.	.	.	.	.	.	.	.	.	.	.
Vv01g01012219001	Cs7g11480	Cc7g01743	Cx7g016350	.	.	Ab7g34349	.	.	.	.	.	.	.	.	.	.	.	.	.	.
Vv01g01012218001	Cs7g11460	Cc7g01744	Cx7g016360	Ci7g036730	.	Ab7g34159	.	.	.	.	.	.	.	.	.	.	.	.	.	.
Vv01g01012217001	.	.	.	.	.	.	.	.	.	.	.	.	.	.	.	.	.	.	.	.
Vv01g01012216001	.	.	.	.	.	.	.	.	.	.	.	.	.	.	.	.	.	.	.	.
Vv01g01012215001	Cs7g11450	Cc7g01745	Cx7g016370	Ci7g036720	.	Ab7g34222	.	.	.	.	.	.	.	.	.	.	.	.	.	.
Vv01g01012214001	Cs7g11440	Cc7g01746	Cx7g016380	Ci7g036710	.	Ab7g34211	.	.	.	.	.	.	.	.	.	.	.	.	.	.
Vv01g01012213001	Cs7g11430	Cc7g01747	Cx7g016390	Ci7g036700	.	Ab7g34323	Vv14g01032919001	.	.	.	.	.	.	.	.	.	.	.	.	.
Vv01g01001340001	Cs2g12010	Cc2g02196	Cx2g036870	.	.	Ab2g23678	.	.	.	.	.	.	.	.	.	.	.	.	.	.
Vv01g01012212001	Cs7g11420	Cc7g01748	Cx7g016400	Ci7g036690	.	Ab7g34223	.	.	.	.	.	.	.	Vv17g01007873001	Cs5g11770	Cc5g01069	Cx5g011220	.	Cm5g094220	Ab5g10671
Vv01g01012211001	Cs7g11360	Cc7g01749	Cx7g016410	Ci7g036680	Cm7g277740	Ab7g34182	.	.	.	.	.	.	.	.	.	.	.	.	.	.
Vv01g01012210001	Cs7g11350	.	.	Ci7g036670	Cm7g159150	Ab7g34305	.	.	.	.	.	.	.	.	.	.	.	.	.	.
Vv01g01012209001	.	Cc7g01750	Cx7g016420	.	.	.	.	.	.	.	.	.	.	.	.	.	.	.	.	.
Vv01g01012208001	.	Cc7g01751	.	.	.	.	.	.	.	.	.	.	.	.	.	.	.	.	.	.
Vv01g01012207001	Cs7g11330	Cc7g01752	Cx7g016440	Ci7g036650	.	Ab7g34360	.	.	.	.	.	.	.	.	.	.	.	.	.	.
Vv01g01012206001	.	.	.	.	.	.	.	.	.	.	.	.	.	.	.	.	.	.	.	.
Vv01g01012205001	.	.	.	.	.	.	.	.	.	.	.	.	.	.	.	.	.	.	.	.
Vv01g01012203001	.	.	.	.	.	.	.	.	.	.	.	.	.	.	.	.	.	.	.	.
Vv01g01012201001	.	.	.	.	.	.	.	.	.	.	.	.	.	.	.	.	.	.	.	.
Vv01g01012200001	.	.	.	.	.	.	.	.	.	.	.	.	.	.	.	.	.	.	.	.
Vv01g01012199001	.	.	.	.	.	.	.	.	.	.	.	.	.	Vv17g01007908001	Cs5g11590	Cc5g01050	Cx5g011040	.	Cm5g093990	Ab5g13868
Vv01g01012198001	Cs7g03050	Cc7g02288	Cx7g021980	Ci7g016480	Cm7g011160	Ab7g14828	Vv14g01011507001	Cs6g22050	Cc6g02147	Cx6g025660	Ci6g076810	Cm6g164300	Ab6g13774	Vv17g01007910001	Cs5g11560	Cc5g01048	Cx5g011010	.	Cm5g093960	Ab5g13871
Vv01g01012197001	Cs7g03070	Cc7g02287	Cx7g021970	Ci7g016450	Cm7g011140	Ab7g15007	Vv14g01011505001	.	.	.	.	.	.	.	.	.	.	.	.	.
Vv01g01012196001	Cs7g03080	Cc7g02285	Cx7g021940	Ci7g016440	Cm7g011130	Ab7g15452	.	.	.	.	.	.	.	.	.	.	.	.	.	.
Vv01g01012194001	Cs7g03090	Cc7g02284	.	Ci7g016420	.	.	Vv14g01011504001	Cs6g22020	Cc6g02144	Cx6g025630	Ci6g076840	Cm6g164270	Ab6g13742	.	.	.	.	.	.	.
Vv01g01012193001	.	.	.	.	.	.	.	.	.	.	.	.	.	.	.	.	.	.	.	.
Vv01g01012192001	Cs7g11210	Cc7g01761	Cx7g016530	Ci7g036510	Cm7g174500	.	.	.	.	.	.	.	.	.	.	.	.	.	.	.
Vv01g01012191001	.	.	.	.	.	.	.	.	.	.	.	.	.	.	.	.	.	.	.	.
Vv01g01012190001	.	.	.	.	.	.	.	.	.	.	.	.	.	.	.	.	.	.	.	.
Vv01g01012189001	.	.	.	.	.	.	.	.	.	.	.	.	.	.	.	.	.	.	.	.
Vv01g01012188001	.	.	.	.	.	.	.	.	.	.	.	.	.	.	.	.	.	.	.	.
Vv01g01012187001	.	.	.	.	.	.	.	.	.	.	.	.	.	.	.	.	.	.	.	.
Vv01g01012185001	.	.	.	.	.	.	.	.	.	.	.	.	.	.	.	.	.	.	.	.
Vv01g01012184001	Cs7g03130	Cc7g02280	Cx7g021910	Ci7g016380	Cm7g011080	Ab7g15146	.	.	.	.	.	.	.	Vv17g01007918001	.	.	.	.	.	.
Vv01g01012183001	Cs7g03140	Cc7g02279	Cx7g021900	Ci7g016370	Cm7g011070	Ab7g15320	.	.	.	.	.	.	.	.	.	.	.	.	.	.
Vv01g01012182001	.	.	.	.	.	.	.	.	.	.	.	.	.	.	.	.	.	.	.	.
Vv01g01012181001	Cs7g03160	Cc7g02277	Cx7g021860	Ci7g016340	Cm7g011040	Ab7g15171	.	.	.	.	.	.	.	.	.	.	.	.	.	.
Vv01g01012179001	Cs7g03180	Cc7g02275	Cx7g021840	Ci7g016310	Cm7g011020	Ab7g15420	.	.	.	.	.	.	.	.	.	.	.	.	.	.
Vv01g01012178001	.	Cc7g02274	Cx7g021830	.	.	.	.	.	.	.	.	.	.	.	.	.	.	.	.	.
Vv01g01012177001	Cs7g03190	Cc7g02273	Cx7g021820	Ci7g016300	Cm7g011010	Ab7g15525	.	.	.	.	.	.	.	.	.	.	.	.	.	.
Vv01g01012176001	.	.	.	.	.	.	.	.	.	.	.	.	.	.	.	.	.	.	.	.
Vv01g01012175001	.	.	.	.	.	.	.	.	.	.	.	.	.	.	.	.	.	.	.	.
Vv01g01012174001	.	.	.	.	.	.	.	.	.	.	.	.	.	.	.	.	.	.	.	.
Vv01g01012173001	Cs7g03220	Cc7g02270	Cx7g021790	Ci7g016280	Cm7g010970	Ab7g14923	Vv14g01011481001	.	.	.	.	.	.	.	.	.	.	.	.	.
Vv01g01012172001	.	.	.	.	.	.	.	.	.	.	.	.	.	.	.	.	.	.	.	.
Vv01g01012171001	Cs2g11860	Cc2g02212	Cx2g037020	Ci2g073210	.	Ab2g23647	.	.	.	.	.	.	.	.	.	.	.	.	.	.
Vv01g01012170001	Cs2g11850	Cc2g02213	Cx2g037030	Ci2g073220	.	Ab2g23532	.	.	.	.	.	.	.	.	.	.	.	.	.	.
Vv01g01012169001	.	.	.	.	.	.	.	.	.	.	.	.	.	.	.	.	.	.	.	.
Vv01g01012168001	.	.	.	.	.	.	.	.	.	.	.	.	.	.	.	.	.	.	.	.
Vv01g01012167001	.	.	.	.	.	.	.	.	.	.	.	.	.	.	.	.	.	.	.	.
Vv01g01012166001	.	.	.	.	.	.	.	.	.	.	.	.	.	.	.	.	.	.	.	.
Vv01g01012165001	.	.	.	.	.	.	.	.	.	.	.	.	.	.	.	.	.	.	.	.
Vv01g01012164001	Cs2g11840	Cc2g02376	Cx2g037060	Ci2g073240	.	Ab2g23629	.	.	.	.	.	.	.	.	.	.	.	.	.	.
Vv01g01012163001	.	.	.	.	.	.	.	.	.	.	.	.	.	.	.	.	.	.	.	.
Vv01g01012161001	Cs2g11830	Cc2g02216	Cx2g037070	Ci2g073250	.	Ab2g23752	.	.	.	.	.	.	.	.	.	.	.	.	.	.
Vv01g01012160001	Cs2g11820	Cc2g02217	Cx2g037080	Ci2g073260	.	.	.	.	.	.	.	.	.	.	.	.	.	.	.	.
Vv01g01012159001	.	.	.	.	.	.	.	.	.	.	.	.	.	.	.	.	.	.	.	.
Vv01g01012158001	Cs2g11800	Cc2g02220	Cx2g037110	Ci2g073280	Cm2g198760	Ab2g23618	.	.	.	.	.	.	.	.	.	.	.	.	.	.
Vv01g01012157001	.	.	.	.	.	.	.	.	.	.	.	.	.	.	.	.	.	.	.	.
Vv01g01012156001	.	.	.	.	.	.	.	.	.	.	.	.	.	.	.	.	.	.	.	.
Vv01g01012155001	Cs2g11770	Cc2g02222	Cx2g037130	Ci2g073310	.	Ab2g23692	.	.	.	.	.	.	.	.	.	.	.	.	.	.
Vv01g01012154001	Cs2g11760	Cc2g02224	Cx2g037140	Ci2g073320	.	Ab2g23507	.	.	.	.	.	.	.	.	.	.	.	.	.	.
Vv01g01012153001	Cs2g11750	Cc2g02225	Cx2g037150	Ci2g073330	.	Ab2g23713	.	.	.	.	.	.	.	.	.	.	.	.	.	.
Vv01g01012152001	.	.	.	.	.	.	.	.	.	.	.	.	.	.	.	.	.	.	.	.
Vv01g01012151001	Cs2g11730	Cc2g02227	Cx2g037170	Ci2g073350	.	Ab2g23594	.	.	.	.	.	.	.	.	.	.	.	.	.	.
Vv01g01012150001	.	.	.	.	.	.	.	.	.	.	.	.	.	.	.	.	.	.	.	.
Vv01g01012149001	.	.	.	.	.	.	.	.	.	.	.	.	.	.	.	.	.	.	.	.
Vv01g01012148001	.	.	.	.	.	.	.	.	.	.	.	.	.	.	.	.	.	.	.	.
Vv01g01012147001	Cs2g11710	Cc7g01526	Cx7g014020	Ci2g073390	.	.	.	.	.	.	.	.	.	.	.	.	.	.	.	.
Vv01g01012146001	Cs2g11700	Cc2g02231	Cx2g037210	Ci2g073400	.	Ab2g23653	.	.	.	.	.	.	.	.	.	.	.	.	.	.
Vv01g01012145001	.	Cc2g02232	Cx2g037220	.	.	.	.	.	.	.	.	.	.	.	.	.	.	.	.	.
Vv01g01012144001	.	.	.	.	.	.	.	.	.	.	.	.	.	.	.	.	.	.	.	.
Vv01g01012143001	Cs2g11690	Cc2g02233	Cx2g037230	Ci2g073430	Cm2g290480	.	.	.	.	.	.	.	.	.	.	.	.	.	.	.
Vv01g01012142001	Cs2g11670	Cc2g02234	Cx2g037240	Ci2g073440	.	.	.	.	.	.	.	.	.	.	.	.	.	.	.	.
Vv01g01012141001	Cs2g11620	Cc2g02235	Cx2g037250	.	.	.	.	.	.	.	.	.	.	.	.	.	.	.	.	.
Vv01g01012140001	Cs2g11590	Cc2g02240	Cx2g037300	Ci2g073510	Cm2g221620	Ab2g23675	.	.	.	.	.	.	.	.	.	.	.	.	.	.
Vv01g01012139001	Cs2g11570	Cc2g02242	Cx2g037320	Ci2g073540	Cm2g221600	Ab2g23693	.	.	.	.	.	.	.	.	.	.	.	.	.	.
Vv01g01012138001	Cs2g11560	Cc2g02243	Cx2g037330	Ci2g073550	.	Ab2g23600	.	.	.	.	.	.	.	.	.	.	.	.	.	.
Vv01g01012136001	Cs2g11540	Cc2g02245	.	.	Cm2g221580	Ab2g23687	.	.	.	.	.	.	.	.	.	.	.	.	.	.
Vv01g01012135001	Cs2g11530	.	Cx2g037350	.	.	Ab2g23577	.	.	.	.	.	.	.	.	.	.	.	.	.	.
Vv01g01012134001	.	Cc2g02246	.	.	.	.	.	.	.	.	.	.	.	.	.	.	.	.	.	.
Vv01g01012131001	Cs2g11510	Cc2g02248	Cx2g037360	Ci2g073590	Cm2g221560	Ab2g23631	.	.	.	.	.	.	.	.	.	.	.	.	.	.
Vv01g01012130001	Cs2g11490	.	.	Ci2g073600	Cm2g221550	Ab2g23636	.	.	.	.	.	.	.	.	.	.	.	.	.	.
Vv01g01012129001	.	Cc2g02249	Cx2g037370	.	.	.	.	.	.	.	.	.	.	.	.	.	.	.	.	.
Vv01g01012128001	.	.	.	.	.	.	.	.	.	.	.	.	.	.	.	.	.	.	.	.
Vv01g01012127001	.	.	.	.	.	.	.	.	.	.	.	.	.	.	.	.	.	.	.	.
Vv01g01012126001	.	.	.	.	.	.	.	.	.	.	.	.	.	.	.	.	.	.	.	.
Vv01g01012125001	Cs2g11480	Cc2g02250	Cx2g037380	Ci2g073610	Cm2g221540	Ab2g23684	.	.	.	.	.	.	.	.	.	.	.	.	.	.
Vv01g01012124001	Cs2g11470	Cc2g02251	Cx2g037400	Ci2g073630	Cm2g221520	Ab2g23496	.	.	.	.	.	.	.	.	.	.	.	.	.	.
Vv01g01012123001	.	.	.	.	.	.	.	.	.	.	.	.	.	.	.	.	.	.	.	.
Vv01g01012122001	.	.	.	.	.	.	.	.	.	.	.	.	.	.	.	.	.	.	.	.
Vv01g01012121001	.	Cc2g02255	Cx2g037440	.	.	.	.	.	.	.	.	.	.	.	.	.	.	.	.	.
Vv01g01012120001	Cs2g11440	.	.	Ci2g073660	Cm2g221490	Ab2g23542	.	.	.	.	.	.	.	.	.	.	.	.	.	.
Vv01g01012119001	.	.	.	.	.	.	.	.	.	.	.	.	.	.	.	.	.	.	.	.
Vv01g01012117001	Cs2g11400	Cc2g02258	Cx2g037470	Ci2g073700	Cm2g221440	Ab2g23698	.	.	.	.	.	.	.	.	.	.	.	.	.	.
Vv01g01012116001	.	.	.	.	.	.	.	.	.	.	.	.	.	.	.	.	.	.	.	.
Vv01g01012115001	.	.	.	.	.	.	.	.	.	.	.	.	.	.	.	.	.	.	.	.
Vv01g01012114001	Cs2g11380	Cc2g02344	Cx2g037500	Ci2g073720	Cm2g221420	Ab2g23481	.	.	.	.	.	.	.	.	.	.	.	.	.	.
Vv01g01012113001	Cs2g11360	Cc2g02262	Cx2g037510	Ci2g073740	Cm2g252210	Ab2g23488	.	.	.	.	.	.	.	.	.	.	.	.	.	.
Vv01g01012112001	.	.	.	.	.	.	.	.	.	.	.	.	.	.	.	.	.	.	.	.
Vv01g01012111001	Cs2g11350	Cc2g02263	Cx2g037520	Ci2g073750	Cm2g252200	Ab2g23564	.	.	.	.	.	.	.	.	.	.	.	.	.	.
Vv01g01012110001	Cs7g13730	Cc7g01516	Cx7g013940	.	.	Ab7g12771	.	.	.	.	.	.	.	.	.	.	.	.	.	.
Vv01g01012108001	Cs2g11320	Cc2g02265	Cx2g037540	Ci2g073770	Cm2g252180	Ab2g23529	.	.	.	.	.	.	.	.	.	.	.	.	.	.
Vv01g01012107001	.	.	.	.	.	.	.	.	.	.	.	.	.	.	.	.	.	.	.	.
Vv01g01012106001	Cs2g11240	Cc7g01818	Cx7g017130	Ci2g073830	Cm2g252110	Ab2g12924	.	.	.	.	.	.	.	.	.	.	.	.	.	.
Vv01g01012105001	Cs2g11210	Cc2g02284	Cx2g037660	Ci2g073840	Cm2g254370	Ab2g12898	.	.	.	.	.	.	.	.	.	.	.	.	.	.
Vv01g01012104001	Cs2g11200	Cc2g02285	Cx2g037670	Ci2g073850	.	Ab2g12908	.	.	.	.	.	.	.	.	.	.	.	.	.	.
Vv01g01012103001	Cs2g11190	Cc2g02286	Cx2g037680	Ci2g073860	.	Ab2g12883	.	.	.	.	.	.	.	.	.	.	.	.	.	.
Vv01g01012102001	.	.	.	.	.	.	.	.	.	.	.	.	.	.	.	.	.	.	.	.
Vv01g01012101001	.	Cc2g02335	.	.	.	.	.	.	.	.	.	.	.	.	.	.	.	.	.	.
Vv01g01012100001	.	Cc2g02334	.	.	.	.	.	.	.	.	.	.	.	.	.	.	.	.	.	.
Vv01g01012098001	Cs2g11170	Cc2g02287	Cx2g037690	Ci2g073870	.	Ab2g12909	.	.	.	.	.	.	.	.	.	.	.	.	.	.
Vv01g01012097001	.	.	.	.	.	.	.	.	.	.	.	.	.	.	.	.	.	.	.	.
Vv01g01012096001	.	.	.	.	.	.	.	.	.	.	.	.	.	.	.	.	.	.	.	.
Vv01g01012095001	.	Cc2g02313	.	.	.	.	.	.	.	.	.	.	.	.	.	.	.	.	.	.
Vv01g01012094001	.	Cc2g02312	.	.	.	.	.	.	.	.	.	.	.	.	.	.	.	.	.	.
Vv01g01012092001	.	.	.	.	.	.	.	.	.	.	.	.	.	.	.	.	.	.	.	.
Vv01g01012089001	.	Cc2g02310	.	.	.	.	.	.	.	.	.	.	.	.	.	.	.	.	.	.
Vv01g01012087001	.	.	.	.	.	.	.	.	.	.	.	.	.	.	.	.	.	.	.	.
Vv01g01012086001	.	.	.	.	.	.	.	.	.	.	.	.	.	.	.	.	.	.	.	.
Vv01g01012085001	.	Cc2g02309	.	.	.	.	.	.	.	.	.	.	.	.	.	.	.	.	.	.
Vv01g01012084001	.	Cc7g01648	.	.	.	.	.	.	.	.	.	.	.	.	.	.	.	.	.	.
Vv01g01012083001	.	Cc2g02307	.	.	.	.	.	.	.	.	.	.	.	.	.	.	.	.	.	.
Vv01g01012082001	.	.	.	.	.	.	.	.	.	.	.	.	.	.	.	.	.	.	.	.
Vv01g01012080001	.	.	.	.	.	.	.	.	.	.	.	.	.	.	.	.	.	.	.	.
Vv01g01012079001	.	Cc2g02305	.	.	.	.	.	.	.	.	.	.	.	.	.	.	.	.	.	.
Vv01g01012076001	.	Cc2g02304	.	.	.	.	.	.	.	.	.	.	.	.	.	.	.	.	.	.
Vv01g01012075001	.	.	.	.	.	.	.	.	.	.	.	.	.	.	.	.	.	.	.	.
Vv01g01012074001	.	Cc2g02303	.	.	.	.	.	.	.	.	.	.	.	.	.	.	.	.	.	.
Vv01g01012072001	.	Cc2g02298	.	.	.	.	.	.	.	.	.	.	.	.	.	.	.	.	.	.
Vv01g01012071001	.	Cc2g02296	.	.	.	.	.	.	.	.	.	.	.	.	.	.	.	.	.	.
Vv01g01012070001	.	.	.	.	.	.	.	.	.	.	.	.	.	.	.	.	.	.	.	.
Vv01g01012069001	.	.	.	.	.	.	.	.	.	.	.	.	.	.	.	.	.	.	.	.
Vv01g01012068001	Cs2g11120	Cc2g02293	Cx2g037750	Ci2g073930	.	Ab2g12901	.	.	.	.	.	.	.	.	.	.	.	.	.	.
Vv01g01012066001	.	.	.	.	.	.	.	.	.	.	.	.	.	.	.	.	.	.	.	.
Vv01g01012065001	.	.	.	.	.	.	.	.	.	.	.	.	.	.	.	.	.	.	.	.
Vv01g01012063001	.	Cc2g02289	.	.	.	.	.	.	.	.	.	.	.	.	.	.	.	.	.	.
Vv01g01012062001	.	.	Cx7g013830	.	.	.	.	.	.	.	.	.	.	.	.	.	.	.	.	.
Vv01g01012061001	.	.	.	.	.	.	.	.	.	.	.	.	.	.	.	.	.	.	.	.
Vv01g01012059001	.	.	.	.	.	.	.	.	.	.	.	.	.	.	.	.	.	.	.	.
Vv01g01012058001	.	.	.	.	.	.	.	.	.	.	.	.	.	.	.	.	.	.	.	.
Vv01g01012057001	.	.	.	.	.	.	.	.	.	.	.	.	.	.	.	.	.	.	.	.
Vv01g01012056001	.	Cc7g01498	.	.	.	.	.	.	.	.	.	.	.	.	.	.	.	.	.	.
Vv01g01012055001	Cs7g13920	.	.	.	.	Ab7g34235	.	.	.	.	.	.	.	.	.	.	.	.	.	.
Vv01g01012054001	.	.	.	.	.	.	.	.	.	.	.	.	.	.	.	.	.	.	.	.
Vv01g01012053001	.	.	.	.	.	.	.	.	.	.	.	.	.	.	.	.	.	.	.	.
Vv01g01012052001	.	.	.	.	.	.	.	.	.	.	.	.	.	.	.	.	.	.	.	.
Vv01g01012051001	.	.	Cx7g013780	.	.	.	.	.	.	.	.	.	.	.	.	.	.	.	.	.
Vv01g01012050001	.	.	.	.	.	.	.	.	.	.	.	.	.	.	.	.	.	.	.	.
Vv01g01012049001	.	.	.	.	.	.	.	.	.	.	.	.	.	.	.	.	.	.	.	.
Vv01g01012047001	.	.	.	.	.	.	.	.	.	.	.	.	.	Vv17g01008186001	Cs7g12380	Cc5g01155	.	.	Cm7g037240	Ab7g34302
Vv01g01012046001	.	.	.	.	.	.	.	.	.	.	.	.	.	.	.	.	.	.	.	.
Vv01g01012045001	Cs7g13970	Cc7g01494	.	.	.	Ab7g11601	.	.	.	.	.	.	.	.	.	.	.	.	.	.
Vv01g01012044001	Cs7g13980	Cc7g01493	Cx7g013710	.	.	Ab7g11610	.	.	.	.	.	.	.	.	.	.	.	.	.	.
Vv01g01012043001	Cs7g13990	Cc7g01492	Cx7g013700	.	.	Ab7g11620	.	.	.	.	.	.	.	.	.	.	.	.	.	.
Vv01g01012042001	Cs7g14000	Cc7g01491	Cx7g013690	.	.	Ab7g11629	.	.	.	.	.	.	.	.	.	.	.	.	.	.
Vv01g01012041001	Cs7g14010	Cc7g01490	Cx7g013680	.	.	Ab7g11594	.	.	.	.	.	.	.	.	.	.	.	.	.	.
Vv01g01012040001	Cs7g14020	Cc7g01489	Cx7g013670	.	.	Ab7g11616	Vv14g01036475001	Cs6g19120	Cc6g01862	Cx6g020010	Ci6g046890	Cm6g090320	Ab6g20306	.	.	.	.	.	.	.
Vv01g01012039001	.	.	.	.	.	.	.	.	.	.	.	.	.	.	.	.	.	.	.	.
Vv01g01012038001	.	.	.	.	.	.	.	.	.	.	.	.	.	.	.	.	.	.	.	.
Vv01g01012037001	Cs7g14060	Cc7g01486	Cx7g013650	.	Cm7g053150	Ab7g11589	.	.	.	.	.	.	.	.	.	.	.	.	.	.
Vv01g01012036001	Cs7g14070	Cc7g01485	Cx7g013640	.	.	Ab7g11631	.	.	.	.	.	.	.	.	.	.	.	.	.	.
Vv01g01012035001	Cs7g14080	Cc7g01484	Cx7g013630	.	.	Ab7g11615	.	.	.	.	.	.	.	.	.	.	.	.	.	.
Vv01g01012033001	.	.	.	.	.	.	.	.	.	.	.	.	.	.	.	.	.	.	.	.
Vv01g01012031001	.	.	.	.	.	.	.	.	.	.	.	.	.	.	.	.	.	.	.	.
Vv01g01012030001	.	Cc7g01455	Cx7g013490	.	.	.	.	.	.	.	.	.	.	.	.	.	.	.	.	.
Vv01g01012028001	.	Cc7g01646	Cx7g015290	.	.	.	.	.	.	.	.	.	.	.	.	.	.	.	.	.
Vv01g01012027001	Cs7g12440	.	.	.	Cm7g037300	Ab7g34287	.	.	.	.	.	.	.	.	.	.	.	.	.	.
Vv01g01012026001	.	.	.	.	.	.	.	.	.	.	.	.	.	.	.	.	.	.	.	.
Vv01g01012025001	.	.	.	.	.	.	.	.	.	.	.	.	.	.	.	.	.	.	.	.
Vv01g01012023001	Cs7g12460	Cc7g01645	Cx7g015280	.	Cm7g037330	Ab7g34154	.	.	.	.	.	.	.	.	.	.	.	.	.	.
Vv01g01012022001	.	.	.	.	.	.	.	.	.	.	.	.	.	.	.	.	.	.	.	.
Vv01g01012020001	.	.	.	.	.	.	.	.	.	.	.	.	.	.	.	.	.	.	.	.
Vv01g01012019001	.	Cc7g01643	Cx7g015250	.	.	.	.	.	.	.	.	.	.	.	.	.	.	.	.	.
Vv01g01012018001	Cs7g12470	.	.	.	Cm7g037360	Ab7g34387	.	.	.	.	.	.	.	.	.	.	.	.	.	.
Vv01g01012015001	.	Cc7g01642	Cx7g015230	.	.	.	.	.	.	.	.	.	.	.	.	.	.	.	.	.
Vv01g01012012001	Cs7g12490	.	.	Ci7g293780	Cm7g037380	Ab7g34316	.	.	.	.	.	.	.	.	.	.	.	.	.	.
Vv01g01012011001	.	Cc7g01640	Cx7g015210	.	.	.	.	.	.	.	.	.	.	.	.	.	.	.	.	.
Vv01g01012010001	.	.	.	.	.	.	.	.	.	.	.	.	.	.	.	.	.	.	.	.
Vv01g01012009001	.	.	.	.	.	.	.	.	.	.	.	.	.	.	.	.	.	.	.	.
Vv01g01012008001	.	.	.	.	.	.	.	.	.	.	.	.	.	.	.	.	.	.	.	.
Vv01g01012006001	Cs7g12530	Cc7g01637	Cx7g015180	.	Cm7g037410	.	.	.	.	.	.	.	.	Vv17g01008204001	Cs5g12710	Cc5g01173	.	.	Cm5g155070	Ab5g13241
Vv01g01012005001	Cs7g12540	Cc7g01636	Cx7g015170	.	Cm7g037420	Ab7g34378	.	.	.	.	.	.	.	Vv17g01008205001	Cs7g12540	Cc5g01174	.	.	Cm7g037420	Ab7g34378
Vv01g01012004001	Cs7g12550	Cc7g01635	Cx7g015160	Ci7g262040	Cm7g037430	Ab7g34230	.	.	.	.	.	.	.	.	.	.	.	.	.	.
Vv01g01012003001	.	.	.	.	.	.	.	.	.	.	.	.	.	.	.	.	.	.	.	.
Vv01g01012002001	.	Cc7g01634	Cx7g015140	.	.	.	.	.	.	.	.	.	.	.	.	.	.	.	.	.
Vv01g01012001001	Cs7g12580	Cc7g01633	Cx7g015130	.	Cm7g037460	Ab7g34417	.	.	.	.	.	.	.	.	.	.	.	.	.	.
Vv01g01012000001	Cs7g12590	Cc7g01632	Cx7g015120	.	Cm7g037470	Ab7g34181	.	.	.	.	.	.	.	.	.	.	.	.	.	.
Vv01g01011999001	.	.	.	.	.	.	.	.	.	.	.	.	.	.	.	.	.	.	.	.
Vv01g01011998001	.	.	.	.	.	.	.	.	.	.	.	.	.	.	.	.	.	.	.	.
Vv01g01011997001	.	.	.	.	.	.	.	.	.	.	.	.	.	.	.	.	.	.	.	.
Vv01g01011996001	.	.	.	.	.	.	.	.	.	.	.	.	.	.	.	.	.	.	.	.
Vv01g01011994001	.	.	.	.	.	.	.	.	.	.	.	.	.	.	.	.	.	.	.	.
Vv01g01011993001	.	.	.	.	.	.	.	.	.	.	.	.	.	.	.	.	.	.	.	.
Vv01g01011991001	.	.	.	.	.	.	.	.	.	.	.	.	.	.	.	.	.	.	.	.
Vv01g01011990001	.	.	.	.	.	.	.	.	.	.	.	.	.	.	.	.	.	.	.	.
Vv01g01011989001	.	.	.	.	.	.	.	.	.	.	.	.	.	.	.	.	.	.	.	.
Vv01g01011988001	.	.	.	.	.	.	.	.	.	.	.	.	.	.	.	.	.	.	.	.
Vv01g01011987001	.	.	.	.	.	.	.	.	.	.	.	.	.	.	.	.	.	.	.	.
Vv01g01011986001	.	.	.	.	.	.	.	.	.	.	.	.	.	.	.	.	.	.	.	.
Vv01g01011985001	.	.	.	.	.	.	.	.	.	.	.	.	.	.	.	.	.	.	.	.
Vv01g01011984001	.	.	.	.	.	.	.	.	.	.	.	.	.	.	.	.	.	.	.	.
Vv01g01011982001	.	.	.	.	.	.	.	.	.	.	.	.	.	.	.	.	.	.	.	.
Vv01g01011981001	.	.	.	.	.	.	.	.	.	.	.	.	.	.	.	.	.	.	.	.
Vv01g01011979001	Cs7g12630	Cc7g01628	Cx7g015080	.	Cm7g037510	Ab7g34311	.	.	.	.	.	.	.	.	.	.	.	.	.	.
Vv01g01011978001	Cs7g12640	Cc7g01626	Cx7g015070	.	Cm7g037520	Ab7g34301	.	.	.	.	.	.	.	.	.	.	.	.	.	.
Vv01g01011977001	.	.	.	.	.	.	Vv14g01036455001	Cs6g19030	Cc6g01853	Cx6g019910	Ci6g047000	Cm6g090430	Ab6g19985	.	.	.	.	.	.	.
Vv01g01011976001	Cs7g12650	Cc7g01625	Cx7g015050	.	Cm7g037550	Ab7g34399	.	.	.	.	.	.	.	Vv17g01008216001	Cs7g12650	Cc5g01178	.	.	Cm7g037550	Ab7g34399
Vv01g01011974001	.	.	.	.	.	.	.	.	.	.	.	.	.	.	.	.	.	.	.	.
Vv01g01011972001	Cs7g12670	Cc7g01622	Cx7g015030	.	Cm7g037570	Ab7g34200	.	.	.	.	.	.	.	.	.	.	.	.	.	.
Vv01g01011971001	.	.	.	.	.	.	.	.	.	.	.	.	.	.	.	.	.	.	.	.
Vv01g01011970001	Cs7g12680	Cc7g01621	Cx7g015020	.	Cm7g037580	Ab7g34354	.	.	.	.	.	.	.	.	.	.	.	.	.	.
Vv01g01011969001	Cs7g12690	Cc7g01620	Cx7g015010	.	Cm7g037590	Ab7g34283	Vv14g01036452001	Cs6g18980	Cc6g01849	Cx6g019850	Ci6g047050	Cm6g090490	Ab6g20012	.	.	.	.	.	.	.
Vv01g01011967001	Cs7g12700	Cc7g01619	Cx7g015000	.	Cm7g037600	Ab7g34277	.	.	.	.	.	.	.	.	.	.	.	.	.	.
Vv01g01011966001	Cs7g12710	Cc7g01618	Cx7g014990	.	Cm7g037610	Ab7g34402	.	.	.	.	.	.	.	Vv17g01008227001	Cs7g12710	.	.	.	Cm7g037610	Ab7g34402
Vv01g01011964001	Cs7g12740	Cc7g01615	Cx7g014970	.	Cm7g037620	Ab7g34218	.	.	.	.	.	.	.	.	.	.	.	.	.	.
Vv01g01011963001	Cs7g12760	Cc7g01613	Cx7g014950	.	Cm7g037630	Ab7g34309	.	.	.	.	.	.	.	.	.	.	.	.	.	.
Vv01g01011962001	Cs7g12770	Cc7g01612	Cx7g014910	.	Cm7g037650	Ab7g34158	Vv14g01036449001	Cs6g18940	Cc6g01846	Cx6g019820	Ci6g047110	Cm6g090520	Ab6g20048	Vv17g01008234001	Cs7g12770	Cc5g01199	.	.	Cm7g037650	Ab7g34158
Vv01g01011960001	Cs7g12800	Cc7g01609	Cx7g014890	.	Cm7g037690	Ab7g34178	.	.	.	.	.	.	.	.	.	.	.	.	.	.
Vv01g01011959001	Cs7g12810	Cc7g01608	Cx7g014880	.	Cm7g037700	Ab7g34395	.	.	.	.	.	.	.	Vv17g01008237001	Cs7g12810	Cc5g01201	.	.	Cm7g037700	Ab7g34395
Vv01g01011958001	Cs7g12820	Cc7g01607	Cx7g014870	.	Cm7g037710	Ab7g34306	.	.	.	.	.	.	.	Vv17g01008238001	Cs7g12820	.	.	.	Cm7g037710	Ab7g34306
Vv01g01011956001	.	Cc2g02165	Cx2g036520	.	.	.	.	.	.	.	.	.	.	.	.	.	.	.	.	.
Vv01g01011955001	Cs2g12340	.	.	Ci2g072720	.	Ab2g23626	.	.	.	.	.	.	.	.	.	.	.	.	.	.
Vv01g01011954001	Cs7g12840	Cc7g01606	Cx7g014860	.	Cm7g037720	.	.	.	.	.	.	.	.	.	.	.	.	.	.	.
Vv01g01011952001	Cs7g12850	Cc7g01605	Cx7g014850	.	Cm7g037730	Ab7g34370	.	.	.	.	.	.	.	.	.	.	.	.	.	.
Vv01g01011951001	.	.	.	.	.	.	.	.	.	.	.	.	.	.	.	.	.	.	.	.
Vv01g01011950001	.	.	.	.	.	.	.	.	.	.	.	.	.	.	.	.	.	.	.	.
Vv01g01011949001	.	Cc7g01604	Cx7g014840	.	.	.	.	.	.	.	.	.	.	.	.	.	.	.	.	.
Vv01g01011948001	Cs7g12860	Cc7g01603	Cx7g014830	.	Cm7g037750	Ab7g34224	.	.	.	.	.	.	.	.	.	.	.	.	.	.
Vv01g01011947001	Cs7g12870	Cc7g01602	Cx7g014820	.	Cm7g037760	Ab7g34382	Vv14g01036447001	Cs6g18930	Cc6g01845	Cx6g019810	Ci6g047120	Cm6g090530	Ab6g19899	.	.	.	.	.	.	.
Vv01g01011946001	Cs7g12880	Cc7g01601	Cx7g014810	.	Cm7g037770	Ab7g34367	.	.	.	.	.	.	.	.	.	.	.	.	.	.
Vv01g01011944001	Cs7g12890	Cc7g01600	Cx7g014800	.	Cm7g037780	Ab7g34245	Vv14g01036445001	Cs6g18910	Cc6g01843	Cx6g019790	Ci6g047150	Cm6g090560	Ab6g20114	.	.	.	.	.	.	.
Vv01g01011943001	Cs7g12900	Cc7g01599	Cx7g014790	.	.	Ab7g34215	.	.	.	.	.	.	.	.	.	.	.	.	.	.
Vv01g01011942001	Cs7g12910	Cc7g01598	Cx7g014780	.	Cm7g037790	Ab7g34273	.	.	.	.	.	.	.	.	.	.	.	.	.	.
Vv01g01011941001	Cs7g12920	Cc7g01597	Cx7g014770	.	Cm7g037800	Ab7g34189	.	.	.	.	.	.	.	.	.	.	.	.	.	.
Vv01g01011940001	Cs7g12930	Cc7g01596	Cx7g014760	.	Cm7g037810	Ab7g34298	.	.	.	.	.	.	.	.	.	.	.	.	.	.
Vv01g01011939001	Cs7g12940	Cc7g01595	Cx7g014750	.	Cm7g037820	Ab7g34205	.	.	.	.	.	.	.	Vv17g01008248001	Cs7g12940	.	.	.	Cm7g037820	Ab7g34205
Vv01g01011938001	Cs7g12950	Cc7g01594	Cx7g014740	.	Cm7g037830	Ab7g34248	.	.	.	.	.	.	.	.	.	.	.	.	.	.
Vv01g01011936001	Cs7g12960	Cc7g01593	Cx7g014730	.	Cm7g037840	Ab7g34368	.	.	.	.	.	.	.	Vv17g01008253001	Cs7g12960	.	.	.	Cm7g037840	Ab7g34368
Vv01g01011934001	Cs7g12970	Cc7g01592	Cx7g014720	.	Cm7g037850	Ab7g34285	.	.	.	.	.	.	.	.	.	.	.	.	.	.
Vv01g01011932001	Cs7g12980	Cc7g01591	Cx7g014710	.	Cm7g037860	Ab7g34195	.	.	.	.	.	.	.	.	.	.	.	.	.	.
Vv01g01011930001	Cs7g13000	Cc7g01589	Cx7g014700	.	Cm7g037870	Ab7g34229	.	.	.	.	.	.	.	.	.	.	.	.	.	.
Vv01g01011929001	Cs7g13010	Cc7g01588	Cx7g014690	.	Cm7g037880	Ab7g34184	.	.	.	.	.	.	.	.	.	.	.	.	.	.
Vv01g01011928001	Cs7g13040	Cc7g01586	.	Ci7g230440	Cm7g037910	Ab7g34393	.	.	.	.	.	.	.	.	.	.	.	.	.	.
Vv01g01011927001	.	.	.	.	.	.	.	.	.	.	.	.	.	.	.	.	.	.	.	.
Vv01g01011926001	Cs7g13050	Cc7g01584	Cx7g014660	Ci7g116720	Cm7g037920	.	Vv14g01031066001	.	.	.	.	.	.	Vv17g01008259001	Cs7g13040	Cc5g01217	.	Ci7g230440	Cm7g037910	Ab7g34393
Vv01g01011925001	Cs7g13060	Cc7g01583	Cx7g014650	.	.	.	Vv14g01031065001	.	Cc6g01831	Cx6g019680	.	.	.	.	.	.	.	.	.	.
Vv01g01011923001	Cs7g13070	Cc7g01582	Cx7g014640	Ci7g230500	Cm7g037940	Ab7g34353	.	.	.	.	.	.	.	Vv17g01008268001	Cs7g13070	Cc5g01221	.	Ci7g230500	Cm7g037940	Ab7g34353
Vv01g01011922001	Cs7g13080	Cc7g01581	Cx7g014630	Ci7g230510	Cm7g037950	Ab7g34242	.	.	.	.	.	.	.	Vv17g01008270001	Cs7g13080	Cc5g01222	.	Ci7g230510	Cm7g037950	Ab7g34242
Vv01g01011921001	.	.	.	.	.	.	.	.	.	.	.	.	.	.	.	.	.	.	.	.
Vv01g01011920001	Cs7g13100	Cc7g01579	Cx7g014610	.	Cm7g037970	Ab7g34251	.	.	.	.	.	.	.	.	.	.	.	.	.	.
Vv01g01011919001	Cs7g13110	Cc7g01578	Cx7g014600	.	Cm7g037980	Ab7g34220	.	.	.	.	.	.	.	.	.	.	.	.	.	.
Vv01g01011918001	Cs7g13120	Cc7g01577	Cx7g014590	.	Cm7g037990	Ab7g34327	Vv14g01031052001	Cs6g18760	Cc6g01827	Cx6g019650	Ci6g199430	Cm6g090700	Ab6g20205	.	.	.	.	.	.	.
Vv01g01011917001	.	.	.	.	.	.	.	.	.	.	.	.	.	.	.	.	.	.	.	.
Vv01g01011916001	Cs7g13140	Cc7g01576	Cx7g014580	.	Cm7g038000	Ab7g34390	.	.	.	.	.	.	.	.	.	.	.	.	.	.
Vv01g01011914001	.	.	.	.	.	.	.	.	.	.	.	.	.	.	.	.	.	.	.	.
Vv01g01011913001	.	.	.	.	.	.	.	.	.	.	.	.	.	.	.	.	.	.	.	.
Vv01g01011912001	Cs7g13160	Cc7g01573	Cx7g014550	.	Cm7g038020	Ab7g34225	.	.	.	.	.	.	.	.	.	.	.	.	.	.
Vv01g01011911001	.	.	.	.	.	.	.	.	.	.	.	.	.	.	.	.	.	.	.	.
Vv01g01011909001	Cs7g13170	Cc7g01572	Cx7g014530	.	Cm7g038050	Ab7g34344	.	.	.	.	.	.	.	.	.	.	.	.	.	.
Vv01g01011908001	.	.	.	.	.	.	.	.	.	.	.	.	.	.	.	.	.	.	.	.
Vv01g01011907001	Cs7g13210	Cc7g01568	.	.	Cm7g038090	Ab7g34167	Vv14g01031048001	Cs6g18740	Cc6g01826	Cx6g019630	Ci6g199450	Cm6g090720	Ab6g20063	.	.	.	.	.	.	.
Vv01g01011906001	Cs7g13220	Cc7g01567	Cx7g014490	Ci7g230570	Cm7g038100	Ab7g34361	.	.	.	.	.	.	.	.	.	.	.	.	.	.
Vv01g01011905001	.	.	.	.	.	.	.	.	.	.	.	.	.	.	.	.	.	.	.	.
Vv01g01011904001	Cs7g13250	Cc7g01564	Cx7g014460	.	Cm7g038160	Ab7g34269	.	.	.	.	.	.	.	.	.	.	.	.	.	.
Vv01g01011903001	.	.	.	.	.	.	.	.	.	.	.	.	.	.	.	.	.	.	.	.
Vv01g01011902001	Cs7g13260	Cc7g01563	Cx7g014430	.	Cm7g038170	Ab7g34150	.	.	.	.	.	.	.	.	.	.	.	.	.	.
Vv01g01011901001	Cs7g13280	Cc7g01562	Cx7g014420	.	Cm7g038180	Ab7g34324	.	.	.	.	.	.	.	.	.	.	.	.	.	.
Vv01g01011900001	Cs7g13310	Cc7g01560	Cx7g014400	.	Cm7g038200	Ab7g34217	Vv14g01031042001	.	.	.	.	.	.	.	.	.	.	.	.	.
Vv01g01011899001	Cs7g13320	Cc7g01559	Cx7g014390	.	Cm7g038210	Ab7g34317	.	.	.	.	.	.	.	.	.	.	.	.	.	.
Vv01g01011898001	Cs7g13330	Cc7g01558	Cx7g014380	.	Cm7g038220	Ab7g34186	.	.	.	.	.	.	.	.	.	.	.	.	.	.
Vv01g01011897001	Cs2g12490	Cc2g02150	Cx2g036370	Ci2g130780	.	Ab2g23664	.	.	.	.	.	.	.	.	.	.	.	.	.	.
Vv01g01011896001	.	Cc2g02149	Cx2g036360	.	.	.	Vv14g01031035001	Cs6g18700	Cc6g01822	Cx6g019590	Ci6g199490	Cm6g090760	Ab6g20304	Vv17g01008284001	.	Cc5g01235	Cx5g022750	.	.	.
Vv01g01011895001	Cs2g12500	.	.	Ci2g130790	.	Ab2g23641	.	.	.	.	.	.	.	.	.	.	.	.	.	.
Vv01g01011894001	Cs2g12520	Cc2g02147	Cx2g036340	Ci2g130810	.	Ab2g23519	.	.	.	.	.	.	.	.	.	.	.	.	.	.
Vv01g01011893001	.	.	.	.	.	.	.	.	.	.	.	.	.	.	.	.	.	.	.	.
Vv01g01011892001	Cs2g12540	Cc2g02144	Cx2g036280	Ci2g130840	.	Ab2g23630	Vv14g01031028001	Cs6g18660	Cc6g01820	Cx6g019560	Ci6g199530	Cm6g090800	Ab6g20301	Vv17g01008289001	.	Cc5g01241	Cx5g022730	.	.	.
Vv01g01011891001	Cs2g12550	Cc2g02142	Cx2g036270	Ci2g130850	.	Ab2g23656	.	.	.	.	.	.	.	.	.	.	.	.	.	.
Vv01g01011890001	Cs2g12570	Cc2g02141	Cx2g036260	Ci2g130860	.	.	.	.	.	.	.	.	.	.	.	.	.	.	.	.
Vv01g01011889001	Cs2g12580	Cc2g02140	Cx2g036250	Ci2g130870	.	Ab2g23500	.	.	.	.	.	.	.	.	.	.	.	.	.	.
Vv01g01011888001	Cs2g12590	Cc2g02139	Cx2g036240	Ci2g130880	.	Ab2g23611	Vv14g01031026001	Cs6g18650	Cc6g01819	Cx6g019550	Ci6g199540	.	Ab6g20162	.	.	.	.	.	.	.
Vv01g01011887001	.	.	.	.	.	.	.	.	.	.	.	.	.	.	.	.	.	.	.	.
Vv01g01011886001	Cs2g12620	Cc2g02136	Cx2g036220	Ci2g130890	.	.	.	.	.	.	.	.	.	.	.	.	.	.	.	.
Vv01g01011882001	Cs2g12650	Cc2g02133	Cx2g036190	Ci2g130920	.	Ab2g23666	.	.	.	.	.	.	.	.	.	.	.	.	.	.
Vv01g01011881001	.	.	.	.	.	.	.	.	.	.	.	.	.	.	.	.	.	.	.	.
Vv01g01011879001	Cs2g12670	.	.	Ci2g130940	.	Ab2g23489	.	.	.	.	.	.	.	.	.	.	.	.	.	.
Vv01g01011878001	Cs2g12680	.	.	Ci2g130950	.	Ab2g23528	.	.	.	.	.	.	.	.	.	.	.	.	.	.
Vv01g01011877001	.	Cc2g02131	Cx2g036170	.	.	.	.	.	.	.	.	.	.	.	.	.	.	.	.	.
Vv01g01011876001	.	Cc2g02130	Cx2g036160	.	.	.	.	.	.	.	.	.	.	.	.	.	.	.	.	.
Vv01g01011873001	Cs2g12690	Cc2g02129	Cx2g036150	Ci2g130960	.	Ab2g23719	Vv14g01031020001	Cs6g18610	Cc6g01815	Cx6g019500	Ci6g199590	.	Ab6g20250	Vv17g01008299001	.	Cc5g01254	Cx5g022610	.	.	.
Vv01g01011872001	.	.	.	.	.	.	.	.	.	.	.	.	.	.	.	.	.	.	.	.
Vv01g01011871001	Cs2g12710	Cc2g02127	Cx2g036130	Ci2g130980	.	Ab2g23609	.	.	.	.	.	.	.	.	.	.	.	.	.	.
Vv01g01011870001	Cs2g12720	Cc2g02126	Cx2g036120	Ci2g131000	Cm2g210370	Ab2g23520	Vv14g01031017001	Cs6g18580	Cc6g01812	Cx6g019480	Ci6g199620	.	Ab6g20168	.	.	.	.	.	.	.
Vv01g01011869001	Cs2g12740	Cc2g02124	Cx2g036100	Ci2g131020	.	Ab2g23710	.	.	.	.	.	.	.	Vv17g01008316001	.	.	.	.	.	.
Vv01g01011868001	Cs2g12790	Cc2g02120	Cx2g036060	Ci2g131070	.	Ab2g23546	Vv14g01031007001	.	Cc6g01802	Cx6g019400	.	.	.	.	.	.	.	.	.	.
Vv01g01011867001	Cs2g12800	Cc2g02119	Cx2g036050	Ci2g131090	.	Ab2g23495	.	.	.	.	.	.	.	.	.	.	.	.	.	.
Vv01g01011866001	.	.	.	.	.	.	.	.	.	.	.	.	.	.	.	.	.	.	.	.
Vv01g01011865001	.	.	.	.	.	.	.	.	.	.	.	.	.	.	.	.	.	.	.	.
Vv01g01011864001	.	Cc2g02117	Cx2g036030	.	.	.	.	.	.	.	.	.	.	Vv17g01008317001	.	Cc5g02520	Cx5g022290	.	.	.
Vv01g01011863001	Cs2g12820	.	.	Ci2g131110	.	Ab2g23527	.	.	.	.	.	.	.	.	.	.	.	.	.	.
Vv01g01011862001	Cs2g12830	Cc2g02116	Cx2g036010	Ci2g131120	.	Ab2g23588	.	.	.	.	.	.	.	.	.	.	.	.	.	.
Vv01g01011861001	Cs2g12840	Cc2g02115	Cx2g036000	Ci2g131130	Cm2g210250	Ab2g23584	Vv14g01031004001	Cs6g18470	Cc6g01799	Cx6g019370	Ci6g199750	.	Ab6g20112	Vv17g01008319001	.	.	Cx5g022270	.	.	.
Vv01g01011859001	.	.	.	.	.	.	.	.	.	.	.	.	.	.	.	.	.	.	.	.
Vv01g01011858001	Cs2g12850	Cc2g02113	Cx2g035990	Ci2g131150	Cm2g210260	Ab2g23556	.	.	.	.	.	.	.	Vv17g01008320001	.	Cc5g02518	Cx5g022260	.	.	.
Vv01g01011857001	.	.	.	.	.	.	.	.	.	.	.	.	.	.	.	.	.	.	.	.
Vv01g01011856001	.	.	.	.	.	.	Vv14g01031002001	Cs6g18460	Cc6g01798	Cx6g019360	Ci6g199780	.	Ab6g20224	.	.	.	.	.	.	.
Vv01g01011855001	.	.	.	.	.	.	.	.	.	.	.	.	.	.	.	.	.	.	.	.
Vv01g01011854001	.	.	.	.	.	.	.	.	.	.	.	.	.	.	.	.	.	.	.	.
Vv01g01011853001	Cs2g12910	Cc2g02107	Cx2g035940	Ci2g131200	.	Ab2g23742	.	.	.	.	.	.	.	.	.	.	.	.	.	.
Vv01g01011852001	Cs2g12920	Cc2g02104	Cx2g035900	Ci2g131210	Cm4g053630	.	.	.	.	.	.	.	.	.	.	.	.	.	.	.
Vv01g01011850001	.	.	.	.	.	.	.	.	.	.	.	.	.	.	.	.	.	.	.	.
Vv01g01011849001	.	.	.	.	.	.	.	.	.	.	.	.	.	.	.	.	.	.	.	.
Vv01g01011848001	Cs2g12970	Cc2g02098	Cx2g035850	Ci2g131260	.	Ab2g23567	.	.	.	.	.	.	.	Vv17g01008332001	Cs5g12870	Cc5g02502	Cx5g022130	.	Cm5g155180	Ab5g13230
Vv01g01011847001	Cs2g12980	Cc2g02097	Cx2g035840	Ci2g131270	.	Ab2g23628	Vv14g01030990001	Cs6g18360	Cc6g01785	Cx6g019270	Ci6g199890	Cm6g049460	Ab6g20049	.	.	.	.	.	.	.
Vv01g01011846001	Cs2g12990	Cc2g02096	Cx2g035830	Ci2g131300	.	Ab2g23689	.	.	.	.	.	.	.	.	.	.	.	.	.	.
Vv01g01011845001	Cs2g13020	Cc2g02093	Cx2g035810	Ci2g131330	.	Ab2g27065	.	.	.	.	.	.	.	Vv17g01008336001	Cs5g12810	Cc5g02497	Cx5g022090	.	Cm5g155140	Ab5g13232
Vv01g01011843001	Cs2g13050	Cc2g02091	Cx2g035790	Ci2g131340	.	Ab2g23680	.	.	.	.	.	.	.	.	.	.	.	.	.	.
Vv01g01011842001	.	.	.	.	.	.	.	.	.	.	.	.	.	.	.	.	.	.	.	.
Vv01g01011841001	Cs2g13070	Cc2g02089	Cx2g035770	Ci2g131360	Cm2g250460	Ab2g23648	.	.	.	.	.	.	.	.	.	.	.	.	.	.
Vv01g01011840001	.	.	.	.	.	.	.	.	.	.	.	.	.	Vv17g01008343001	Cs5g12730	Cc5g02490	Cx5g022040	.	Cm5g155090	Ab5g13229
Vv01g01011838001	Cs2g13080	Cc2g02088	Cx2g035760	Ci2g131370	Cm2g250470	Ab2g23650	.	.	.	.	.	.	.	Vv17g01008344001	Cs5g12720	Cc5g02489	Cx5g022030	.	Cm5g155080	Ab5g13234
Vv01g01011835001	Cs2g13090	Cc2g02087	Cx2g035750	Ci2g131380	Cm2g250480	Ab2g23735	.	.	.	.	.	.	.	.	.	.	.	.	.	.
Vv01g01011834001	.	.	.	.	.	.	.	.	.	.	.	.	.	.	.	.	.	.	.	.
Vv01g01011833001	.	.	.	.	.	.	.	.	.	.	.	.	.	.	.	.	.	.	.	.
Vv01g01011832001	.	Cc2g02085	Cx2g035720	.	.	.	.	.	.	.	.	.	.	.	.	.	.	.	.	.
Vv01g01011831001	.	.	.	.	.	.	.	.	.	.	.	.	.	.	.	.	.	.	.	.
Vv01g01011829001	Cs2g13110	Cc2g02084	.	Ci2g131400	Cm2g250510	Ab2g23569	Vv14g01030973001	Cs6g18270	Cc6g01776	Cx6g019190	Ci6g083490	.	Ab6g20217	Vv17g01008347001	.	.	.	.	.	.
Vv01g01011828001	Cs2g13120	.	.	Ci2g131410	Cm2g250520	Ab2g23744	.	.	.	.	.	.	.	.	.	.	.	.	.	.
Vv01g01011825001	.	Cc2g02076	.	.	.	.	.	.	.	.	.	.	.	.	.	.	.	.	.	.
Vv01g01011824001	Cs2g13200	.	.	Ci2g131490	Cm2g250610	Ab2g23523	.	.	.	.	.	.	.	.	.	.	.	.	.	.
Vv01g01011823001	Cs2g13210	.	.	Ci2g131500	Cm2g241910	Ab2g23616	.	.	.	.	.	.	.	.	.	.	.	.	.	.
Vv01g01011822001	Cs2g13220	Cc2g02075	.	Ci2g131510	.	Ab2g23643	.	.	.	.	.	.	.	.	.	.	.	.	.	.
Vv01g01011821001	.	Cc2g02074	.	.	.	.	.	.	.	.	.	.	.	.	.	.	.	.	.	.
Vv01g01011820001	Cs2g13230	.	.	Ci2g131520	Cm2g241920	Ab2g23695	.	.	.	.	.	.	.	.	.	.	.	.	.	.
Vv01g01011819001	Cs2g13240	Cc2g02073	.	Ci2g131530	Cm2g241930	Ab2g23494	Vv14g01030969001	Cs6g18230	Cc6g01770	Cx6g019160	Ci6g083550	Cm6g049600	Ab6g20245	.	.	.	.	.	.	.
Vv01g01011817001	.	.	.	.	.	.	.	.	.	.	.	.	.	.	.	.	.	.	.	.
Vv01g01011816001	.	.	.	.	.	.	.	.	.	.	.	.	.	.	.	.	.	.	.	.
Vv01g01011815001	.	.	.	.	.	.	.	.	.	.	.	.	.	.	.	.	.	.	.	.
Vv01g01011814001	.	.	.	.	.	.	.	.	.	.	.	.	.	Vv17g01008352001	.	.	.	.	.	.
Vv01g01011813001	.	.	.	.	.	.	.	.	.	.	.	.	.	.	.	.	.	.	.	.
Vv01g01011812001	Cs2g13400	Cc2g02044	Cx2g034370	.	Cm2g276090	Ab2g23729	.	.	.	.	.	.	.	Vv17g01008354001	.	Cc4g01077	Cx4g010990	.	.	.
Vv01g01011810001	Cs2g13410	Cc2g02043	Cx2g034350	.	Cm4g053630	Ab2g23585	.	.	.	.	.	.	.	.	.	.	.	.	.	.
Vv01g01011809001	Cs2g13420	Cc2g02042	Cx2g034340	.	Cm4g053620	Ab2g23578	.	.	.	.	.	.	.	Vv17g01008365001	.	Cc4g01072	Cx4g011050	.	.	.
Vv01g01011808001	Cs2g13440	Cc2g02041	Cx2g034320	.	Cm4g053590	Ab2g23704	.	.	.	.	.	.	.	Vv17g01008367001	.	.	.	.	.	.
Vv01g01011807001	.	.	.	.	.	.	.	.	.	.	.	.	.	.	.	.	.	.	.	.
Vv01g01011806001	Cs2g13470	Cc2g02037	.	Ci2g202080	.	Ab2g23673	.	.	.	.	.	.	.	.	.	.	.	.	.	.
Vv01g01011805001	Cs2g13480	Cc2g02036	Cx2g034290	Ci2g202090	Cm4g053560	Ab2g23487	.	.	.	.	.	.	.	.	.	.	.	.	.	.
Vv01g01011804001	Cs2g13490	Cc2g02035	Cx2g034280	.	Cm4g053550	Ab2g23541	.	.	.	.	.	.	.	.	.	.	.	.	.	.
Vv01g01011803001	.	.	.	.	.	.	.	.	.	.	.	.	.	.	.	.	.	.	.	.
Vv01g01011802001	.	.	.	.	.	.	.	.	.	.	.	.	.	.	.	.	.	.	.	.
Vv01g01011801001	.	.	.	.	.	.	.	.	.	.	.	.	.	.	.	.	.	.	.	.
Vv01g01011800001	.	.	.	.	.	.	.	.	.	.	.	.	.	.	.	.	.	.	.	.
Vv01g01011798001	Cs2g13540	Cc2g02031	Cx2g034210	.	Cm4g053500	Ab2g23539	Vv14g01030943001	Cs6g18110	Cc6g01750	Cx6g019050	Ci6g083670	Cm6g049800	Ab6g20169	.	.	.	.	.	.	.
Vv01g01011797001	Cs2g13550	Cc2g02030	Cx2g034200	.	Cm4g053480	Ab2g23531	.	.	.	.	.	.	.	Vv17g01008378001	.	.	.	.	.	.
Vv01g01011796001	Cs2g13560	Cc2g02029	Cx2g034190	.	Cm4g053470	Ab2g23726	.	.	.	.	.	.	.	.	.	.	.	.	.	.
Vv01g01011795001	.	.	.	.	.	.	.	.	.	.	.	.	.	.	.	.	.	.	.	.
Vv01g01011794001	Cs2g13580	Cc2g02027	Cx2g034170	.	Cm4g053450	Ab2g23572	.	.	.	.	.	.	.	.	.	.	.	.	.	.
Vv01g01011792001	Cs2g13590	Cc2g02026	Cx2g034150	.	Cm4g053440	Ab2g23547	.	.	.	.	.	.	.	.	.	.	.	.	.	.
Vv01g01011791001	.	.	.	.	.	.	.	.	.	.	.	.	.	.	.	.	.	.	.	.
Vv01g01011790001	Cs2g13610	Cc2g02024	Cx2g034130	.	Cm4g053420	Ab2g23591	Vv14g01030921001	Cs6g18030	Cc6g01746	Cx6g018980	Ci6g083750	Cm6g049880	Ab6g20140	.	.	.	.	.	.	.
Vv01g01011789001	.	.	.	.	.	.	Vv14g01030910001	Cs6g17990	Cc6g01742	Cx6g018950	Ci6g083780	Cm6g049920	Ab6g20155	.	.	.	.	.	.	.
Vv01g01011788001	Cs2g13660	Cc2g02021	Cx2g034100	.	.	.	.	.	.	.	.	.	.	.	.	.	.	.	.	.
Vv01g01011786001	.	.	.	.	.	.	.	.	.	.	.	.	.	.	.	.	.	.	.	.
Vv01g01011785001	Cs2g13690	Cc2g02017	Cx2g034070	.	Cm4g053360	Ab2g23526	.	.	.	.	.	.	.	.	.	.	.	.	.	.
Vv01g01011783001	Cs2g13710	Cc2g02015	Cx2g034040	.	Cm4g053340	Ab2g23504	Vv14g01030905001	Cs6g17970	Cc6g01740	Cx6g018920	Ci6g083800	Cm6g049940	Ab6g20092	.	.	.	.	.	.	.
Vv01g01011781001	.	.	.	.	.	.	.	.	.	.	.	.	.	.	.	.	.	.	.	.
Vv01g01011780001	Cs2g13760	Cc2g02011	Cx2g034000	.	Cm4g053300	Ab2g23576	.	.	.	.	.	.	.	.	.	.	.	.	.	.
Vv01g01011779001	.	.	.	.	.	.	.	.	.	.	.	.	.	.	.	.	.	.	.	.
Vv01g01011778001	Cs2g13790	Cc2g02008	Cx2g033970	Ci2g295590	Cm4g053250	Ab2g23603	Vv14g01030883001	Cs6g17860	Cc6g01726	Cx6g018770	Ci6g044770	Cm6g050050	.	.	.	.	.	.	.	.
Vv01g01011777001	.	Cc2g02006	Cx2g033940	.	.	.	Vv14g01030880001	Cs6g17830	Cc6g01723	.	.	Cm6g050100	.	.	.	.	.	.	.	.
Vv01g01011776001	.	Cc2g02004	Cx2g033920	.	.	.	.	.	.	.	.	.	.	.	.	.	.	.	.	.
Vv01g01011775001	.	.	.	.	.	.	.	.	.	.	.	.	.	.	.	.	.	.	.	.
Vv01g01011773001	.	.	.	.	.	.	.	.	.	.	.	.	.	.	.	.	.	.	.	.
Vv01g01011772001	.	.	.	.	.	.	.	.	.	.	.	.	.	.	.	.	.	.	.	.
Vv01g01011768001	.	.	.	.	.	.	.	.	.	.	.	.	.	.	.	.	.	.	.	.
Vv01g01011767001	.	Cc2g02002	Cx2g029080	.	.	.	.	.	.	.	.	.	.	.	.	.	.	.	.	.
Vv01g01011766001	.	Cc2g02001	Cx2g033890	.	.	.	Vv14g01030865001	Cs6g17760	Cc6g01716	Cx6g018680	Ci6g084010	Cm6g050180	Ab6g20087	Vv17g01008403001	.	.	.	.	.	.
Vv01g01011764001	.	Cc2g02000	Cx2g033880	.	.	.	.	.	.	.	.	.	.	.	.	.	.	.	.	.
Vv01g01011763001	.	Cc2g01999	Cx2g033870	.	.	.	.	.	.	.	.	.	.	.	.	.	.	.	.	.
Vv01g01011761001	Cs2g16550	Cc2g01996	Cx2g033840	.	Cm2g203630	.	.	.	.	.	.	.	.	.	.	.	.	.	.	.
Vv01g01011760001	Cs2g16560	Cc2g01995	Cx2g033830	Ci2g081180	Cm2g203640	Ab2g23659	.	.	.	.	.	.	.	.	.	.	.	.	.	.
Vv01g01011757001	Cs2g16590	Cc2g01993	Cx2g033820	Ci2g081170	Cm2g203660	Ab2g23592	.	.	.	.	.	.	.	.	.	.	.	.	.	.
Vv01g01011756001	.	.	.	.	.	.	.	.	.	.	.	.	.	.	.	.	.	.	.	.
Vv01g01011755001	Cs2g16620	.	Cx2g033780	Ci2g081130	Cm2g078880	Ab2g23606	.	.	.	.	.	.	.	.	.	.	.	.	.	.
Vv01g01011754001	Cs2g16630	Cc2g01990	Cx2g033770	Ci2g081110	Cm2g078890	Ab2g23562	.	.	.	.	.	.	.	.	.	.	.	.	.	.
Vv01g01011753001	Cs2g16640	Cc2g01989	Cx2g033760	Ci2g081100	Cm2g078900	Ab2g23486	.	.	.	.	.	.	.	.	.	.	.	.	.	.
Vv01g01011752001	.	.	.	.	.	.	.	.	.	.	.	.	.	.	.	.	.	.	.	.
Vv01g01011751001	Cs2g16650	Cc2g01988	Cx2g033750	Ci2g081090	Cm2g078910	Ab2g23718	.	.	.	.	.	.	.	.	.	.	.	.	.	.
Vv01g01011750001	.	.	.	.	.	.	.	.	.	.	.	.	.	.	.	.	.	.	.	.
Vv01g01011749001	.	.	.	.	.	.	.	.	.	.	.	.	.	.	.	.	.	.	.	.
Vv01g01011748001	.	.	.	.	.	.	.	.	.	.	.	.	.	.	.	.	.	.	.	.
Vv01g01011747001	Cs2g16710	Cc2g01983	Cx2g033700	Ci2g081040	Cm2g078970	Ab2g23741	.	.	.	.	.	.	.	.	.	.	.	.	.	.
Vv01g01011746001	Cs2g16720	Cc2g01981	Cx2g033690	Ci2g081030	Cm2g078980	.	.	.	.	.	.	.	.	.	.	.	.	.	.	.
Vv01g01011745001	Cs2g16730	Cc2g01980	Cx2g033680	Ci2g081020	Cm2g078990	.	.	.	.	.	.	.	.	.	.	.	.	.	.	.
Vv01g01011744001	Cs2g16740	Cc2g01979	Cx2g033670	Ci2g081000	Cm2g079000	.	.	.	.	.	.	.	.	.	.	.	.	.	.	.
Vv01g01011742001	Cs2g16760	Cc2g01978	Cx2g033660	Ci2g080990	Cm2g079010	.	.	.	.	.	.	.	.	.	.	.	.	.	.	.
Vv01g01011740001	Cs2g16770	Cc2g01977	Cx2g033650	Ci2g080980	Cm2g079020	.	.	.	.	.	.	.	.	.	.	.	.	.	.	.
Vv01g01011739001	Cs2g16780	Cc2g01975	Cx2g033640	Ci2g080970	Cm2g079030	.	.	.	.	.	.	.	.	.	.	.	.	.	.	.
Vv01g01011738001	Cs2g16790	Cc2g01974	Cx2g033630	Ci2g080960	Cm2g079040	.	.	.	.	.	.	.	.	Vv17g01008424001	.	Cc4g01026	Cx4g011660	.	.	.
Vv01g01011737001	Cs2g16800	Cc2g01973	Cx2g033620	Ci2g080950	Cm2g079050	.	.	.	.	.	.	.	.	.	.	.	.	.	.	.
Vv01g01011735001	.	.	.	.	.	.	.	.	.	.	.	.	.	.	.	.	.	.	.	.
Vv01g01011734001	Cs2g16820	Cc2g01971	Cx2g033600	Ci2g080930	Cm2g079060	.	.	.	.	.	.	.	.	Vv17g01008427001	.	Cc4g01022	Cx4g011700	.	.	.
Vv01g01011733001	.	.	.	.	.	.	.	.	.	.	.	.	.	.	.	.	.	.	.	.
Vv01g01011730001	.	.	.	.	.	.	.	.	.	.	.	.	.	.	.	.	.	.	.	.
Vv01g01011729001	Cs2g16830	Cc2g01970	Cx2g033590	Ci2g226990	Cm2g079070	.	.	.	.	.	.	.	.	.	.	.	.	.	.	.
Vv01g01011728001	.	.	Cx2g033580	.	.	.	.	.	.	.	.	.	.	.	.	.	.	.	.	.
Vv01g01011726001	Cs2g16840	Cc2g01968	Cx2g033560	Ci2g080890	Cm2g079080	.	.	.	.	.	.	.	.	.	.	.	.	.	.	.
Vv01g01011724001	.	.	.	.	.	.	.	.	.	.	.	.	.	.	.	.	.	.	.	.
Vv01g01011719001	Cs2g16860	Cc2g01967	Cx2g033550	Ci2g080860	Cm2g079100	Ab2g16566	.	.	.	.	.	.	.	.	.	.	.	.	.	.
Vv01g01011718001	Cs2g16870	.	Cx2g029800	Ci2g080830	Cm2g079110	.	.	.	.	.	.	.	.	.	.	.	.	.	.	.
Vv01g01011717001	.	.	.	.	.	.	.	.	.	.	.	.	.	.	.	.	.	.	.	.
Vv01g01011716001	.	.	.	.	.	.	.	.	.	.	.	.	.	.	.	.	.	.	.	.
Vv01g01011715001	.	.	.	.	.	.	.	.	.	.	.	.	.	Vv17g01008429001	.	Cc4g01021	Cx4g011710	.	.	.
Vv01g01011714001	Cs2g16880	Cc2g01966	Cx2g033540	Ci2g080820	Cm2g079120	.	.	.	.	.	.	.	.	.	.	.	.	.	.	.
Vv01g01011713001	.	.	.	.	.	.	.	.	.	.	.	.	.	.	.	.	.	.	.	.
Vv01g01011712001	Cs2g16890	Cc2g01965	Cx2g033530	Ci2g080810	Cm2g079130	.	Vv14g01030815001	Cs6g17560	Cc6g01697	Cx6g018430	Ci6g084230	Cm6g050470	Ab6g20110	Vv17g01008446001	.	.	.	.	.	.
Vv01g01011711001	Cs2g16900	Cc2g01964	Cx2g033520	Ci2g080800	Cm2g079140	Ab2g16518	Vv14g01030810001	Cs6g17540	Cc6g01695	Cx6g018410	Ci6g084250	Cm6g050490	Ab6g20196	.	.	.	.	.	.	.
Vv01g01011710001	Cs2g16940	Cc2g01960	Cx2g033500	Ci2g080780	Cm2g079160	.	.	.	.	.	.	.	.	.	.	.	.	.	.	.
Vv01g01011709001	Cs2g16950	Cc2g01959	Cx2g033490	Ci2g080770	Cm2g079170	.	.	.	.	.	.	.	.	.	.	.	.	.	.	.
Vv01g01011708001	Cs2g16980	.	.	Ci2g080730	Cm2g079220	.	Vv14g01030770001	Cs6g17180	Cc6g01656	Cx6g018030	Ci6g084640	Cm6g270760	Ab6g20170	.	.	.	.	.	.	.
Vv01g01011707001	.	Cc2g01957	Cx2g033460	.	.	.	.	.	.	.	.	.	.	.	.	.	.	.	.	.
Vv01g01011706001	Cs2g16990	Cc2g01955	Cx2g033440	Ci2g080720	Cm2g079230	.	.	.	.	.	.	.	.	.	.	.	.	.	.	.
Vv01g01011705001	Cs2g17000	Cc2g01954	Cx2g033430	.	.	.	.	.	.	.	.	.	.	.	.	.	.	.	.	.
Vv01g01011704001	Cs2g17010	Cc2g01953	Cx2g029120	Ci2g080710	Cm2g079240	.	.	.	.	.	.	.	.	.	.	.	.	.	.	.
Vv01g01011703001	Cs2g17020	Cc2g01952	Cx2g033410	Ci2g080700	Cm2g079250	.	.	.	.	.	.	.	.	.	.	.	.	.	.	.
Vv01g01011702001	.	.	.	.	.	.	.	.	.	.	.	.	.	.	.	.	.	.	.	.
Vv01g01011701001	Cs2g17040	Cc2g01950	Cx2g033390	Ci2g080680	Cm2g079280	.	.	.	.	.	.	.	.	.	.	.	.	.	.	.
Vv01g01011700001	Cs2g17060	Cc2g01949	Cx2g033380	.	Cm2g079290	.	.	.	.	.	.	.	.	.	.	.	.	.	.	.
Vv01g01011699001	Cs2g17070	Cc2g01948	Cx2g033370	.	Cm2g079300	.	.	.	.	.	.	.	.	.	.	.	.	.	.	.
Vv01g01011698001	.	.	.	.	.	.	.	.	.	.	.	.	.	.	.	.	.	.	.	.
Vv01g01011697001	.	.	.	.	.	.	.	.	.	.	.	.	.	.	.	.	.	.	.	.
Vv01g01011696001	.	.	.	.	.	.	.	.	.	.	.	.	.	.	.	.	.	.	.	.
Vv01g01011694001	Cs2g17100	Cc2g01944	Cx2g033320	Ci2g080620	Cm2g079360	.	.	.	.	.	.	.	.	.	.	.	.	.	.	.
Vv01g01011693001	.	.	.	.	.	.	.	.	.	.	.	.	.	.	.	.	.	.	.	.
Vv01g01011692001	Cs2g17130	Cc2g01940	Cx2g033260	Ci2g080590	Cm2g079370	.	.	.	.	.	.	.	.	.	.	.	.	.	.	.
Vv01g01011690001	.	.	.	.	.	.	.	.	.	.	.	.	.	.	.	.	.	.	.	.
Vv01g01011689001	Cs2g17160	Cc2g01937	Cx2g029770	.	Cm2g079420	.	.	.	.	.	.	.	.	.	.	.	.	.	.	.
Vv01g01011688001	.	.	.	.	.	.	.	.	.	.	.	.	.	.	.	.	.	.	.	.
Vv01g01011687001	Cs2g17170	Cc2g01936	.	Ci2g080570	Cm2g079440	.	.	.	.	.	.	.	.	.	.	.	.	.	.	.
Vv01g01011685001	Cs2g17190	Cc2g01935	Cx2g029760	Ci2g080560	Cm2g079450	.	.	.	.	.	.	.	.	.	.	.	.	.	.	.
Vv01g01011683001	Cs2g17200	Cc2g01934	Cx2g029750	Ci2g080550	Cm2g079460	.	.	.	.	.	.	.	.	.	.	.	.	.	.	.
Vv01g01011682001	.	Cc2g01933	Cx2g029740	.	.	.	.	.	.	.	.	.	.	.	.	.	.	.	.	.
Vv01g01011680001	Cs2g17220	Cc2g01932	Cx2g029730	Ci2g080530	Cm2g079480	.	.	.	.	.	.	.	.	.	.	.	.	.	.	.
Vv01g01011679001	Cs2g17230	Cc2g01931	Cx2g029720	Ci2g080520	Cm2g079490	.	.	.	.	.	.	.	.	Vv17g01008453001	.	.	.	.	.	.
Vv01g01011678001	Cs2g17240	Cc2g01930	Cx2g029710	Ci2g080510	Cm2g079500	.	.	.	.	.	.	.	.	.	.	.	.	.	.	.
Vv01g01011677001	.	.	.	.	.	.	.	.	.	.	.	.	.	.	.	.	.	.	.	.
Vv01g01011676001	Cs2g17250	Cc2g01929	Cx2g029700	Ci2g080500	.	.	.	.	.	.	.	.	.	.	.	.	.	.	.	.
Vv01g01011675001	Cs2g17260	Cc2g01928	Cx2g029690	Ci2g080470	.	.	Vv14g01030681001	.	Cc6g01679	.	.	.	.	.	.	.	.	.	.	.
Vv01g01011674001	.	.	.	.	.	.	.	.	.	.	.	.	.	.	.	.	.	.	.	.
Vv01g01011673001	Cs2g17270	Cc2g01927	Cx2g029680	Ci2g080460	.	.	.	.	.	.	.	.	.	.	.	.	.	.	.	.
Vv01g01011671001	Cs2g17280	Cc2g01926	Cx2g029670	Ci2g080450	.	.	.	.	.	.	.	.	.	.	.	.	.	.	.	.
Vv01g01011670001	.	.	.	.	.	.	.	.	.	.	.	.	.	.	.	.	.	.	.	.
Vv01g01011669001	Cs2g17360	Cc2g01920	Cx2g029590	Ci2g080340	Cm2g224120	.	.	.	.	.	.	.	.	.	.	.	.	.	.	.
Vv01g01011668001	Cs2g17370	Cc2g01919	Cx2g029580	Ci2g080330	.	.	.	.	.	.	.	.	.	Vv17g01008469001	.	.	.	.	.	.
Vv01g01011666001	Cs2g17390	Cc2g01917	Cx2g029540	Ci2g080310	.	.	.	.	.	.	.	.	.	.	.	.	.	.	.	.
Vv01g01011665001	Cs2g17410	Cc2g01915	Cx2g029520	Ci2g080290	.	.	.	.	.	.	.	.	.	.	.	.	.	.	.	.
Vv01g01011664001	Cs2g17430	Cc2g01914	Cx2g029510	Ci2g080280	.	Ab2g19299	.	.	.	.	.	.	.	.	.	.	.	.	.	.
Vv01g01011663001	.	.	.	.	.	.	.	.	.	.	.	.	.	.	.	.	.	.	.	.
Vv01g01011662001	.	Cc2g01913	Cx2g029500	.	.	.	.	.	.	.	.	.	.	.	.	.	.	.	.	.
Vv01g01011661001	Cs2g17440	.	.	Ci2g080270	Cm2g170610	Ab2g19301	.	.	.	.	.	.	.	.	.	.	.	.	.	.
Vv01g01011660001	Cs2g17450	Cc2g01912	Cx2g029490	Ci2g080260	Cm2g170620	Ab2g19283	.	.	.	.	.	.	.	.	.	.	.	.	.	.
Vv01g01011659001	Cs2g17460	Cc2g01911	Cx2g029480	Ci2g080250	Cm2g170630	Ab2g19277	.	.	.	.	.	.	.	.	.	.	.	.	.	.
Vv01g01011657001	Cs2g17470	Cc2g01910	Cx2g029470	Ci2g080240	Cm2g170640	Ab2g19272	.	.	.	.	.	.	.	.	.	.	.	.	.	.
Vv01g01011656001	Cs2g17480	Cc2g01909	Cx2g029460	Ci2g080230	Cm2g170650	Ab2g19292	.	.	.	.	.	.	.	.	.	.	.	.	.	.
Vv01g01011654001	Cs2g17490	Cc2g01907	Cx2g029440	Ci2g080210	Cm2g170660	Ab2g19300	.	.	.	.	.	.	.	.	.	.	.	.	.	.
Vv01g01011652001	Cs2g17510	Cc2g01904	Cx2g029380	Ci2g080160	Cm2g170710	Ab2g19282	.	.	.	.	.	.	.	.	.	.	.	.	.	.
Vv01g01011651001	Cs2g17530	Cc2g01902	Cx2g029360	Ci2g103530	Cm2g170720	.	.	.	.	.	.	.	.	.	.	.	.	.	.	.
Vv01g01011650001	Cs2g17540	Cc2g01901	Cx2g029350	Ci2g080120	Cm2g170730	Ab2g19304	.	.	.	.	.	.	.	.	.	.	.	.	.	.
Vv01g01011647001	Cs2g17550	Cc2g01900	Cx2g029340	Ci2g080110	Cm2g170740	Ab2g19269	.	.	.	.	.	.	.	.	.	.	.	.	.	.
Vv01g01011646001	Cs2g17560	Cc2g01899	Cx2g029330	Ci2g080100	Cm2g170750	Ab2g19274	.	.	.	.	.	.	.	.	.	.	.	.	.	.
Vv01g01011645001	.	.	Cx2g029320	.	.	.	.	.	.	.	.	.	.	.	.	.	.	.	.	.
Vv01g01011643001	Cs2g17570	.	.	Ci2g080090	Cm2g170760	Ab2g19288	.	.	.	.	.	.	.	.	.	.	.	.	.	.
Vv01g01011642001	.	.	Cx2g029290	.	.	.	.	.	.	.	.	.	.	.	.	.	.	.	.	.
Vv01g01011641001	Cs2g17580	.	Cx2g029300	Ci2g281080	.	.	.	.	.	.	.	.	.	.	.	.	.	.	.	.
Vv01g01011639001	Cs2g17590	.	Cx2g029310	Ci2g281070	Cm2g170770	Ab2g19273	.	.	.	.	.	.	.	.	.	.	.	.	.	.
Vv01g01011638001	Cs2g17600	.	.	Ci2g281050	.	Ab2g19291	.	.	.	.	.	.	.	.	.	.	.	.	.	.
Vv01g01011637001	Cs2g17610	.	Cx2g029290	Ci2g283320	.	Ab2g19284	.	.	.	.	.	.	.	.	.	.	.	.	.	.
Vv01g01011636001	.	.	.	.	.	.	.	.	.	.	.	.	.	.	.	.	.	.	.	.
Vv01g01011635001	Cs2g17630	Cc2g01898	Cx2g029280	.	.	Ab2g19281	.	.	.	.	.	.	.	.	.	.	.	.	.	.
Vv01g01011634001	Cs2g17640	Cc2g01897	Cx2g029270	.	.	Ab2g19271	.	.	.	.	.	.	.	.	.	.	.	.	.	.
Vv01g01011632001	Cs2g17660	Cc2g01895	Cx2g029240	Ci1g058570	.	Ab2g19297	.	.	.	.	.	.	.	.	.	.	.	.	.	.
Vv01g01011631001	.	.	.	.	.	.	.	.	.	.	.	.	.	.	.	.	.	.	.	.
Vv01g01011630001	.	.	.	.	.	.	.	.	.	.	.	.	.	.	.	.	.	.	.	.
Vv01g01011629001	Cs2g17680	Cc2g01894	Cx2g029230	Ci1g058580	.	Ab2g19296	.	.	.	.	.	.	.	.	.	.	.	.	.	.
Vv01g01011628001	Cs2g17690	Cc2g01893	Cx2g029220	Ci1g058590	.	Ab2g19286	.	.	.	.	.	.	.	.	.	.	.	.	.	.
Vv01g01011627001	Cs2g17700	Cc2g01892	Cx2g029210	Ci1g058600	.	Ab2g19280	.	.	.	.	.	.	.	.	.	.	.	.	.	.
Vv01g01011626001	Cs2g17710	Cc2g01891	Cx2g029200	Ci1g058610	.	Ab2g19298	.	.	.	.	.	.	.	.	.	.	.	.	.	.
Vv01g01011625001	Cs2g17720	Cc2g01890	Cx2g029190	Ci1g058620	.	Ab2g19270	.	.	.	.	.	.	.	.	.	.	.	.	.	.
Vv01g01011624001	Cs2g17730	Cc2g01889	Cx2g029180	Ci1g058630	.	Ab2g19295	.	.	.	.	.	.	.	.	.	.	.	.	.	.
Vv01g01011622001	Cs2g17750	Cc2g01886	Cx2g029150	Ci1g058670	.	Ab2g19293	.	.	.	.	.	.	.	.	.	.	.	.	.	.
Vv01g01011621001	Cs2g17760	Cc2g01885	Cx2g029140	Ci1g058680	.	.	.	.	.	.	.	.	.	.	.	.	.	.	.	.
Vv01g01011620001	.	.	.	.	.	.	.	.	.	.	.	.	.	.	.	.	.	.	.	.
Vv01g01011619001	Cs2g17780	Cc2g01882	Cx2g029110	Ci1g058710	.	.	.	.	.	.	.	.	.	.	.	.	.	.	.	.
Vv01g01011617001	.	.	Cx2g029700	.	.	.	.	.	.	.	.	.	.	.	.	.	.	.	.	.
Vv01g01011616001	Cs2g17820	Cc2g01879	Cx2g029080	Ci1g058720	Cm2g166130	Ab2g37177	.	.	.	.	.	.	.	.	.	.	.	.	.	.
Vv01g01011615001	.	.	.	.	.	.	.	.	.	.	.	.	.	.	.	.	.	.	.	.
Vv01g01011613001	.	.	.	.	.	.	.	.	.	.	.	.	.	.	.	.	.	.	.	.
Vv01g01011612001	Cs2g17860	Cc7g01897	Cx7g017950	Ci1g058830	.	.	.	.	.	.	.	.	.	.	.	.	.	.	.	.
Vv01g01011610001	Cs2g17870	Cc2g01872	Cx2g028970	Ci1g058850	.	.	.	.	.	.	.	.	.	.	.	.	.	.	.	.
Vv01g01011609001	.	Cc2g01871	Cx2g028940	.	.	.	.	.	.	.	.	.	.	.	.	.	.	.	.	.
Vv01g01011608001	Cs2g17890	.	.	Ci1g058870	.	.	.	.	.	.	.	.	.	.	.	.	.	.	.	.
Vv01g01011607001	.	Cc2g01870	Cx2g028930	.	.	.	.	.	.	.	.	.	.	.	.	.	.	.	.	.
Vv01g01011606001	Cs7g09950	Cc2g01869	Cx2g028920	.	.	.	.	.	.	.	.	.	.	.	.	.	.	.	.	.
Vv01g01011605001	Cs2g17910	.	.	Ci1g058890	.	.	.	.	.	.	.	.	.	.	.	.	.	.	.	.
Vv01g01011603001	Cs2g17920	Cc2g01868	Cx2g028900	Ci1g058910	Cm2g000130	.	.	.	.	.	.	.	.	.	.	.	.	.	.	.
Vv01g01011602001	Cs2g17930	Cc2g01867	Cx2g028890	Ci1g058920	.	.	.	.	.	.	.	.	.	.	.	.	.	.	.	.
Vv01g01011601001	Cs2g17950	Cc2g01866	Cx2g028880	Ci1g058930	.	.	.	.	.	.	.	.	.	.	.	.	.	.	.	.
Vv01g01011600001	Cs2g17960	Cc2g01865	Cx2g028870	Ci1g058940	.	.	.	.	.	.	.	.	.	.	.	.	.	.	.	.
Vv01g01011599001	Cs2g17970	Cc2g01864	Cx2g028860	Ci1g058950	.	.	.	.	.	.	.	.	.	.	.	.	.	.	.	.
Vv01g01011598001	.	Cc2g01859	Cx2g028840	.	.	.	.	.	.	.	.	.	.	.	.	.	.	.	.	.
Vv01g01011597001	.	Cc2g01858	Cx2g028820	.	.	.	.	.	.	.	.	.	.	.	.	.	.	.	.	.
Vv01g01011596001	.	Cc2g01857	Cx2g028810	.	.	.	.	.	.	.	.	.	.	.	.	.	.	.	.	.
Vv01g01011595001	.	.	.	.	.	.	.	.	.	.	.	.	.	.	.	.	.	.	.	.
Vv01g01011594001	.	Cc2g01856	Cx2g028800	.	.	.	.	.	.	.	.	.	.	.	.	.	.	.	.	.
Vv01g01011593001	.	Cc2g01855	Cx2g028790	.	.	.	.	.	.	.	.	.	.	.	.	.	.	.	.	.
Vv01g01011592001	.	Cc2g01854	Cx2g028780	.	.	.	.	.	.	.	.	.	.	.	.	.	.	.	.	.
Vv01g01011590001	.	Cc2g01847	Cx2g028690	.	.	.	.	.	.	.	.	.	.	.	.	.	.	.	.	.
Vv01g01011589001	.	Cc2g01846	Cx2g028670	.	.	.	.	.	.	.	.	.	.	.	.	.	.	.	.	.
Vv01g01011588001	.	Cc2g01845	Cx2g028660	.	.	.	.	.	.	.	.	.	.	.	.	.	.	.	.	.
Vv01g01011587001	.	Cc2g01844	Cx2g028650	.	.	.	.	.	.	.	.	.	.	Vv17g01007579001	.	.	.	.	.	.
Vv01g01011586001	.	.	.	.	.	.	.	.	.	.	.	.	.	.	.	.	.	.	.	.
Vv01g01011585001	.	Cc2g01843	.	.	.	.	.	.	.	.	.	.	.	.	.	.	.	.	.	.
Vv01g01011584001	.	Cc2g01842	.	.	.	.	.	.	.	.	.	.	.	.	.	.	.	.	.	.
Vv01g01011583001	.	.	.	.	.	.	.	.	.	.	.	.	.	.	.	.	.	.	.	.
Vv01g01011582001	.	.	.	.	.	.	.	.	.	.	.	.	.	.	.	.	.	.	.	.
Vv01g01011581001	.	.	.	.	.	.	.	.	.	.	.	.	.	.	.	.	.	.	.	.
Vv01g01011579001	.	Cc2g01839	.	.	.	.	.	.	.	.	.	.	.	.	.	.	.	.	.	.
Vv01g01011577001	.	.	.	.	.	.	.	.	.	.	.	.	.	.	.	.	.	.	.	.
Vv01g01011576001	.	.	Cx2g028620	.	.	.	.	.	.	.	.	.	.	.	.	.	.	.	.	.
Vv01g01011574001	.	.	.	.	.	.	.	.	.	.	.	.	.	.	.	.	.	.	.	.
Vv01g01011573001	.	Cc2g01837	Cx2g028610	.	.	.	.	.	.	.	.	.	.	.	.	.	.	.	.	.
Vv01g01011572001	.	Cc2g01836	Cx2g028600	.	.	.	.	.	.	.	.	.	.	.	.	.	.	.	.	.
Vv01g01011570001	.	.	.	.	.	.	.	.	.	.	.	.	.	.	.	.	.	.	.	.
Vv01g01011569001	.	Cc2g01835	Cx2g028580	.	.	.	.	.	.	.	.	.	.	.	.	.	.	.	.	.
Vv01g01011567001	.	Cc2g01834	Cx2g028570	.	.	.	.	.	.	.	.	.	.	.	.	.	.	.	.	.
Vv01g01011565001	.	Cc2g01833	Cx2g028560	.	.	.	.	.	.	.	.	.	.	.	.	.	.	.	.	.
Vv01g01011564001	.	.	.	.	.	.	.	.	.	.	.	.	.	.	.	.	.	.	.	.
Vv01g01011563001	.	.	.	.	.	.	.	.	.	.	.	.	.	.	.	.	.	.	.	.
Vv01g01011562001	.	Cc2g01831	Cx2g028540	.	.	.	.	.	.	.	.	.	.	.	.	.	.	.	.	.
Vv01g01011561001	.	.	.	.	.	.	.	.	.	.	.	.	.	.	.	.	.	.	.	.
Vv01g01011560001	.	.	.	.	.	.	.	.	.	.	.	.	.	.	.	.	.	.	.	.
Vv01g01011558001	.	.	.	.	.	.	.	.	.	.	.	.	.	.	.	.	.	.	.	.
Vv01g01000609001	.	Cc2g01826	Cx2g028500	.	.	.	.	.	.	.	.	.	.	.	.	.	.	.	.	.
Vv01g01000606001	.	Cc7g01734	Cx7g016260	.	.	.	.	.	.	.	.	.	.	.	.	.	.	.	.	.
Vv01g01000604001	.	.	.	.	.	.	.	.	.	.	.	.	.	.	.	.	.	.	.	.
Vv01g01000603001	.	Cc7g01896	Cx7g017940	.	.	.	.	.	.	.	.	.	.	.	.	.	.	.	.	.
Vv01g01000602001	.	.	.	.	.	.	.	.	.	.	.	.	.	.	.	.	.	.	.	.
Vv01g01000601001	.	.	.	.	.	.	.	.	.	.	.	.	.	.	.	.	.	.	.	.
Vv01g01000600001	Cs7g09940	Cc7g01895	Cx7g017920	.	.	.	.	.	.	.	.	.	.	.	.	.	.	.	.	.
Vv01g01000598001	Cs7g09930	Cc7g01894	Cx7g017900	.	.	.	.	.	.	.	.	.	.	.	.	.	.	.	.	.
Vv01g01000597001	.	Cc7g01896	Cx7g017940	.	.	.	.	.	.	.	.	.	.	.	.	.	.	.	.	.
Vv01g01000596001	Cs7g09920	Cc7g01897	Cx7g017950	.	.	.	.	.	.	.	.	.	.	.	.	.	.	.	.	.
Vv01g01000594001	Cs7g09890	Cc7g01900	Cx7g017980	.	.	.	.	.	.	.	.	.	.	.	.	.	.	.	.	.
Vv01g01000593001	Cs7g09880	Cc7g01901	Cx7g017990	.	.	.	.	.	.	.	.	.	.	.	.	.	.	.	.	.
Vv01g01000592001	Cs7g09860	Cc7g01903	Cx7g018030	.	.	.	Vv14g01003984001	Cs2g23970	Cc2g01229	Cx2g013050	Ci2g141050	Cm7g073760	.	Vv17g01007582001	Cs5g06600	Cc5g00560	Cx5g006150	.	Cm5g020020	Ab5g11278
Vv01g01000590001	Cs7g09840	Cc7g01904	Cx7g018040	.	.	.	.	.	.	.	.	.	.	.	.	.	.	.	.	.
Vv01g01000588001	Cs7g09820	Cc7g01906	Cx7g018100	Ci7g153130	.	.	.	.	.	.	.	.	.	.	.	.	.	.	.	.
Vv01g01000587001	Cs7g09790	Cc7g01907	Cx7g018110	.	.	.	.	.	.	.	.	.	.	.	.	.	.	.	.	.
Vv01g01000586001	Cs7g09780	Cc7g01908	Cx7g018120	.	.	.	.	.	.	.	.	.	.	.	.	.	.	.	.	.
Vv01g01000585001	Cs7g09770	Cc7g01909	Cx7g018130	.	.	.	.	.	.	.	.	.	.	.	.	.	.	.	.	.
Vv01g01000584001	Cs7g09760	Cc7g01910	Cx7g018140	.	.	.	.	.	.	.	.	.	.	.	.	.	.	.	.	.
Vv01g01000583001	Cs7g09750	Cc7g01911	Cx7g018150	.	.	.	Vv14g01003988001	.	.	.	.	.	.	.	.	.	.	.	.	.
Vv01g01000582001	Cs7g09740	Cc7g01912	.	.	.	.	.	.	.	.	.	.	.	Vv17g01007585001	Cs5g06570	Cc5g00555	Cx5g006110	.	Cm5g019980	Ab5g10913
Vv01g01000581001	.	.	.	.	.	.	.	.	.	.	.	.	.	.	.	.	.	.	.	.
Vv01g01000580001	.	.	.	.	.	.	.	.	.	.	.	.	.	.	.	.	.	.	.	.
Vv01g01000579001	Cs7g09720	Cc7g01915	Cx7g018180	.	.	.	.	.	.	.	.	.	.	Vv17g01007589001	Cs5g06530	Cc5g00552	Cx5g006070	Ci5g124210	Cm5g019940	Ab5g11230
Vv01g01000578001	Cs7g09710	.	.	.	Cm7g266830	.	Vv14g01032348001	.	.	.	.	.	.	.	.	.	.	.	.	.
Vv01g01000577001	.	Cc7g01916	Cx7g018190	.	.	.	Vv14g01032353001	.	.	Cx2g007750	.	.	.	Vv17g01007594001	Cs5g06490	Cc5g00548	Cx5g006040	Ci5g107090	Cm5g019910	Ab5g10921
Vv01g01000576001	Cs7g09700	Cc7g01917	Cx7g018200	.	Cm7g266820	.	Vv14g01032359001	.	Cc2g00822	Cx2g007740	.	.	.	.	.	.	.	.	.	.
Vv01g01000575001	.	Cc7g01918	Cx7g018210	.	.	.	.	.	.	.	.	.	.	.	.	.	.	.	.	.
Vv01g01000574001	Cs7g09690	Cc7g01919	Cx7g018220	.	Cm7g266800	.	.	.	.	.	.	.	.	.	.	.	.	.	.	.
Vv01g01000573001	Cs7g09680	Cc7g01920	Cx7g018230	.	Cm7g266790	.	.	.	.	.	.	.	.	.	.	.	.	.	.	.
Vv01g01000572001	Cs7g09670	Cc7g01921	Cx7g018240	.	Cm7g266780	.	.	.	.	.	.	.	.	.	.	.	.	.	.	.
Vv01g01000571001	.	.	.	.	.	.	.	.	.	.	.	.	.	.	.	.	.	.	.	.
Vv01g01000570001	Cs7g09660	Cc7g01923	Cx7g018250	.	Cm7g266770	.	Vv14g01032380001	.	.	.	.	.	.	Vv17g01007601001	Cs5g06400	Cc5g00538	Cx5g005960	Ci5g124330	Cm5g019820	Ab5g11258
Vv01g01000569001	.	.	.	.	.	.	.	.	.	.	.	.	.	.	.	.	.	.	.	.
Vv01g01000568001	Cs7g09650	Cc7g01925	Cx7g018270	.	Cm7g266750	.	.	.	.	.	.	.	.	.	.	.	.	.	.	.
Vv01g01000567001	.	.	.	.	.	.	.	.	.	.	.	.	.	.	.	.	.	.	.	.
Vv01g01000566001	.	.	.	.	.	.	.	.	.	.	.	.	.	.	.	.	.	.	.	.
Vv01g01000564001	.	.	.	.	.	.	.	.	.	.	.	.	.	.	.	.	.	.	.	.
Vv01g01000563001	.	.	.	.	.	.	.	.	.	.	.	.	.	.	.	.	.	.	.	.
Vv01g01000561001	Cs7g09620	Cc7g01929	Cx7g018310	.	Cm7g155930	.	.	.	.	.	.	.	.	Vv17g01007619001	Cs5g06330	Cc5g00531	Cx5g005880	Ci5g124460	Cm5g019750	Ab5g11025
Vv01g01000560001	.	.	.	.	.	.	.	.	.	.	.	.	.	.	.	.	.	.	.	.
Vv01g01000559001	.	.	.	.	.	.	.	.	.	.	.	.	.	.	.	.	.	.	.	.
Vv01g01000558001	Cs7g09590	Cc7g01932	.	.	Cm7g155900	.	.	.	.	.	.	.	.	.	.	.	.	.	.	.
Vv01g01000557001	Cs7g09580	Cc7g01933	Cx7g018360	.	Cm7g155890	.	.	.	.	.	.	.	.	.	.	.	.	.	.	.
Vv01g01000555001	Cs7g09560	Cc7g01935	Cx7g018380	.	Cm7g155870	.	.	.	.	.	.	.	.	.	.	.	.	.	.	.
Vv01g01000554001	Cs7g09540	Cc7g01844	Cx7g017400	.	Cm7g155860	.	.	.	.	.	.	.	.	.	.	.	.	.	.	.
Vv01g01000553001	.	Cc7g01730	Cx7g016220	.	.	.	.	.	.	.	.	.	.	.	.	.	.	.	.	.
Vv01g01000552001	.	Cc7g01729	Cx7g016210	.	.	.	.	.	.	.	.	.	.	.	.	.	.	.	.	.
Vv01g01000550001	.	Cc7g01938	Cx7g018410	.	.	.	.	.	.	.	.	.	.	Vv17g01007621001	Cs5g06270	Cc5g00525	Cx5g005810	Ci5g124510	Cm5g019670	Ab5g11231
Vv01g01000549001	Cs7g09520	Cc7g01940	Cx7g018430	.	Cm7g155840	.	.	.	.	.	.	.	.	.	.	.	.	.	.	.
Vv01g01000548001	.	.	.	.	.	.	.	.	.	.	.	.	.	.	.	.	.	.	.	.
Vv01g01000547001	.	.	.	.	.	.	.	.	.	.	.	.	.	.	.	.	.	.	.	.
Vv01g01000546001	.	.	.	.	.	.	.	.	.	.	.	.	.	.	.	.	.	.	.	.
Vv01g01000545001	.	.	Cx7g018460	.	.	.	.	.	.	.	.	.	.	.	.	.	.	.	.	.
Vv01g01000544001	Cs7g09480	Cc7g01944	Cx7g018480	.	Cm7g155800	.	.	.	.	.	.	.	.	Vv17g01007635001	Cs5g06220	Cc5g00522	Cx5g005770	Ci5g124550	Cm5g019630	Ab5g10907
Vv01g01000543001	Cs7g09470	Cc7g01945	Cx7g018490	.	Cm7g155790	.	.	.	.	.	.	.	.	.	.	.	.	.	.	.
Vv01g01000542001	Cs7g09460	Cc7g01946	Cx7g018500	.	Cm7g155780	.	.	.	.	.	.	.	.	.	.	.	.	.	.	.
Vv01g01000541001	.	.	.	.	.	.	.	.	.	.	.	.	.	.	.	.	.	.	.	.
Vv01g01000540001	Cs7g09450	Cc7g01947	Cx7g018510	.	Cm7g155770	.	Vv14g01032382001	Cs2g27140	Cc2g00800	Cx2g007530	Ci2g267920	Cm2g044590	Ab2g30092	.	.	.	.	.	.	.
Vv01g01000538001	Cs7g09440	Cc7g01949	Cx7g018530	.	Cm7g155750	.	.	.	.	.	.	.	.	.	.	.	.	.	.	.
Vv01g01000536001	.	.	.	.	.	.	.	.	.	.	.	.	.	.	.	.	.	.	.	.
Vv01g01000535001	Cs7g09410	Cc7g01952	Cx7g018560	.	Cm7g155720	.	Vv14g01032386001	Cs2g27200	Cc2g00794	Cx2g007470	Ci2g273680	Cm2g044650	Ab2g30123	.	.	.	.	.	.	.
Vv01g01000534001	Cs7g09390	Cc7g01953	Cx7g018570	.	Cm7g155700	.	.	.	.	.	.	.	.	.	.	.	.	.	.	.
Vv01g01013810001	Cs7g09080	Cc7g01980	Cx7g018890	.	Cm7g155410	.	.	.	.	.	.	.	.	Vv17g01007693001	Cs5g05820	Cc5g00481	Cx5g005300	Ci5g125020	Cm5g019150	Ab5g11179
Vv01g01013808001	Cs7g09070	Cc7g01981	Cx7g018900	.	Cm7g155400	.	.	.	.	.	.	.	.	Vv17g01007699001	Cs5g05790	Cc5g00478	Cx5g005270	Ci5g125050	Cm5g019120	Ab5g10871
Vv01g01013806001	Cs7g09060	Cc7g01982	Cx7g018910	.	Cm7g155390	.	.	.	.	.	.	.	.	.	.	.	.	.	.	.
Vv01g01013805001	.	.	.	.	.	.	.	.	.	.	.	.	.	.	.	.	.	.	.	.
Vv01g01013803001	.	.	.	.	.	.	.	.	.	.	.	.	.	.	.	.	.	.	.	.
Vv01g01013802001	Cs7g09040	Cc7g01984	Cx7g018930	.	Cm7g155370	.	.	.	.	.	.	.	.	.	.	.	.	.	.	.
Vv01g01013801001	.	.	.	.	.	.	.	.	.	.	.	.	.	.	.	.	.	.	.	.
Vv01g01013800001	Cs7g09030	Cc7g01985	Cx7g018940	.	.	.	.	.	.	.	.	.	.	.	.	.	.	.	.	.
Vv01g01013799001	.	.	.	.	.	.	.	.	.	.	.	.	.	.	.	.	.	.	.	.
Vv01g01013798001	.	.	.	.	.	.	.	.	.	.	.	.	.	.	.	.	.	.	.	.
Vv01g01013797001	.	.	.	.	.	.	.	.	.	.	.	.	.	.	.	.	.	.	.	.
Vv01g01013796001	.	.	.	.	.	.	.	.	.	.	.	.	.	.	.	.	.	.	.	.
Vv01g01013795001	.	.	.	.	.	.	.	.	.	.	.	.	.	.	.	.	.	.	.	.
Vv01g01013794001	Cs7g09000	Cc7g01988	Cx7g018970	.	.	.	.	.	.	.	.	.	.	.	.	.	.	.	.	.
Vv01g01013793001	.	.	.	.	.	.	.	.	.	.	.	.	.	.	.	.	.	.	.	.
Vv01g01013792001	.	.	.	.	.	.	.	.	.	.	.	.	.	.	.	.	.	.	.	.
Vv01g01013791001	.	.	.	.	.	.	.	.	.	.	.	.	.	.	.	.	.	.	.	.
Vv01g01013790001	Cs7g08990	Cc7g01990	Cx7g018980	.	.	.	.	.	.	.	.	.	.	Vv17g01007715001	Cs5g05700	Cc5g00469	Cx5g005180	Ci5g125140	Cm5g019040	Ab5g10723
Vv01g01013788001	Cs7g08980	Cc7g01991	Cx7g018990	Ci7g044400	.	.	.	.	.	.	.	.	.	.	.	.	.	.	.	.
Vv01g01013787001	.	.	.	.	.	.	.	.	.	.	.	.	.	.	.	.	.	.	.	.
Vv01g01013786001	Cs7g08960	Cc7g01994	Cx7g019010	Ci7g043560	.	.	.	.	.	.	.	.	.	.	.	.	.	.	.	.
Vv01g01013785001	Cs7g08950	Cc7g01995	Cx7g019020	Ci7g043570	.	.	.	.	.	.	.	.	.	.	.	.	.	.	.	.
Vv01g01013784001	Cs7g08940	Cc7g01996	Cx7g019030	Ci7g043580	.	.	.	.	.	.	.	.	.	Vv17g01007725001	.	.	.	.	.	.
Vv01g01013783001	.	.	.	.	.	.	.	.	.	.	.	.	.	.	.	.	.	.	.	.
Vv01g01013782001	Cs7g08930	Cc7g01997	Cx7g019040	Ci7g043590	.	.	.	.	.	.	.	.	.	Vv17g01007726001	Cs5g05600	Cc5g00459	Cx5g005090	Ci5g125240	Cm5g018940	Ab5g11226
Vv01g01013781001	Cs7g08920	Cc7g01998	Cx7g019050	Ci7g043600	.	.	.	.	.	.	.	.	.	.	.	.	.	.	.	.
Vv01g01013780001	.	.	.	.	.	.	Vv14g01032440001	Cs2g27740	Cc2g00738	Cx2g006880	Ci2g032480	Cm7g075500	.	.	.	.	.	.	.	.
Vv01g01013778001	Cs7g08890	Cc7g01715	Cx7g016070	Ci7g043630	.	.	.	.	.	.	.	.	.	.	.	.	.	.	.	.
Vv01g01013777001	Cs7g08880	Cc7g02001	.	Ci7g043640	.	.	.	.	.	.	.	.	.	.	.	.	.	.	.	.
Vv01g01013776001	Cs7g08870	Cc7g02002	Cx7g019080	Ci7g043650	.	.	.	.	.	.	.	.	.	.	.	.	.	.	.	.
Vv01g01013775001	Cs7g08860	Cc7g02003	Cx7g019090	Ci7g043660	.	.	.	.	.	.	.	.	.	Vv17g01007729001	Cs5g05580	Cc5g00457	Cx5g005070	Ci5g125260	Cm5g018920	Ab5g11054
Vv01g01013774001	Cs7g08850	Cc7g02004	Cx7g019100	Ci7g043670	.	.	.	.	.	.	.	.	.	.	.	.	.	.	.	.
Vv01g01013773001	.	Cc7g02005	Cx7g019110	.	.	.	.	.	.	.	.	.	.	.	.	.	.	.	.	.
Vv01g01013772001	.	.	.	.	.	.	.	.	.	.	.	.	.	.	.	.	.	.	.	.
Vv01g01013771001	Cs7g08830	Cc7g02007	Cx7g019130	Ci7g043700	.	.	.	.	.	.	.	.	.	.	.	.	.	.	.	.
Vv01g01013770001	.	.	.	.	.	.	.	.	.	.	.	.	.	.	.	.	.	.	.	.
Vv01g01013769001	Cs7g08810	Cc7g02008	Cx7g019140	Ci7g043720	.	.	.	.	.	.	.	.	.	.	.	.	.	.	.	.
Vv01g01013767001	Cs7g08800	Cc7g02009	Cx7g019150	Ci7g043730	.	.	.	.	.	.	.	.	.	.	.	.	.	.	.	.
Vv01g01013765001	Cs7g08790	Cc7g02010	Cx7g019160	Ci7g043740	.	.	Vv14g01032451001	Cs2g27930	Cc2g00726	Cx2g006710	.	Cm7g075630	Ab2g11413	.	.	.	.	.	.	.
Vv01g01013764001	.	.	.	.	.	.	.	.	.	.	.	.	.	.	.	.	.	.	.	.
Vv01g01013763001	Cs7g08770	Cc7g02011	Cx7g019180	Ci7g043760	.	.	.	.	.	.	.	.	.	.	.	.	.	.	.	.
Vv01g01013762001	Cs7g08760	Cc7g02012	Cx7g019190	Ci7g043770	.	.	.	.	.	.	.	.	.	.	.	.	.	.	.	.
Vv01g01013761001	Cs7g08750	Cc7g02013	Cx7g019200	Ci7g043780	.	.	.	.	.	.	.	.	.	Vv17g01007735001	Cs5g05510	Cc5g00451	Cx5g005000	Ci5g115250	.	Ab5g11210
Vv01g01013760001	Cs7g08740	Cc7g02014	Cx7g019210	Ci7g043790	.	.	.	.	.	.	.	.	.	.	.	.	.	.	.	.
Vv01g01013758001	.	.	.	.	.	.	.	.	.	.	.	.	.	.	.	.	.	.	.	.
Vv01g01013757001	.	Cc7g02015	Cx7g019220	.	.	.	.	.	.	.	.	.	.	.	.	.	.	.	.	.
Vv01g01013755001	.	.	.	.	.	.	.	.	.	.	.	.	.	.	.	.	.	.	.	.
Vv01g01013754001	.	.	.	.	.	.	.	.	.	.	.	.	.	.	.	.	.	.	.	.
Vv01g01013753001	.	.	.	.	.	.	.	.	.	.	.	.	.	.	.	.	.	.	.	.
Vv01g01013752001	.	.	.	.	.	.	.	.	.	.	.	.	.	.	.	.	.	.	.	.
Vv01g01013751001	.	.	.	.	.	.	.	.	.	.	.	.	.	.	.	.	.	.	.	.
Vv01g01013750001	Cs7g08730	.	.	Ci7g043810	.	.	.	.	.	.	.	.	.	.	.	.	.	.	.	.
Vv01g01013749001	.	.	.	.	.	.	.	.	.	.	.	.	.	.	.	.	.	.	.	.
Vv01g01013748001	.	.	.	.	.	.	.	.	.	.	.	.	.	.	.	.	.	.	.	.
Vv01g01013747001	.	.	.	.	.	.	.	.	.	.	.	.	.	.	.	.	.	.	.	.
Vv01g01013745001	Cs7g08710	.	.	Ci7g043840	.	.	.	.	.	.	.	.	.	.	.	.	.	.	.	.
Vv01g01013744001	.	Cc7g02018	Cx7g019250	.	.	.	.	.	.	.	.	.	.	.	.	.	.	.	.	.
Vv01g01013742001	.	.	.	.	.	.	.	.	.	.	.	.	.	.	.	.	.	.	.	.
Vv01g01013741001	.	.	.	.	.	.	.	.	.	.	.	.	.	.	.	.	.	.	.	.
Vv01g01013740001	Cs7g08690	Cc7g02020	Cx7g019270	Ci7g043860	.	.	.	.	.	.	.	.	.	.	.	.	.	.	.	.
Vv01g01013739001	.	.	.	.	.	.	.	.	.	.	.	.	.	.	.	.	.	.	.	.
Vv01g01013738001	.	.	.	.	.	.	.	.	.	.	.	.	.	.	.	.	.	.	.	.
Vv01g01013737001	Cs7g08670	Cc7g02023	Cx7g019290	Ci7g043880	.	.	.	.	.	.	.	.	.	.	.	.	.	.	.	.
Vv01g01013736001	Cs7g08660	Cc7g02024	Cx7g019320	Ci7g043900	.	.	Vv14g01032466001	Cs2g28060	Cc2g00710	Cx2g006580	.	Cm7g075780	Ab2g11395	Vv17g01007745001	.	.	.	.	.	.
Vv01g01013735001	.	.	.	.	.	.	.	.	.	.	.	.	.	.	.	.	.	.	.	.
Vv01g01013734001	Cs7g08640	Cc7g02026	Cx7g019340	Ci7g043920	.	.	.	.	.	.	.	.	.	.	.	.	.	.	.	.
Vv01g01013732001	.	.	.	.	.	.	.	.	.	.	.	.	.	.	.	.	.	.	.	.
Vv01g01013731001	.	.	.	.	.	.	.	.	.	.	.	.	.	.	.	.	.	.	.	.
Vv01g01013730001	.	.	.	.	.	.	.	.	.	.	.	.	.	.	.	.	.	.	.	.
Vv01g01013729001	.	.	.	.	.	.	.	.	.	.	.	.	.	.	.	.	.	.	.	.
Vv01g01013726001	.	.	.	.	.	.	.	.	.	.	.	.	.	.	.	.	.	.	.	.
Vv01g01013725001	.	.	.	.	.	.	.	.	.	.	.	.	.	.	.	.	.	.	.	.
Vv01g01013724001	Cs7g08630	Cc7g02027	Cx7g019350	Ci7g043930	Cm7g293660	.	Vv14g01032481001	.	.	.	.	.	.	.	.	.	.	.	.	.
Vv01g01013722001	Cs7g08620	Cc7g02028	Cx7g019370	Ci7g043940	.	.	.	.	.	.	.	.	.	.	.	.	.	.	.	.
Vv01g01013720001	.	.	.	.	.	.	.	.	.	.	.	.	.	.	.	.	.	.	.	.
Vv01g01013718001	Cs7g08600	Cc7g02029	Cx7g019380	Ci7g043970	.	.	.	.	.	.	.	.	.	Vv17g01007771001	.	.	.	.	.	.
Vv01g01013716001	.	.	.	.	.	.	.	.	.	.	.	.	.	.	.	.	.	.	.	.
Vv01g01013714001	.	.	.	.	.	.	.	.	.	.	.	.	.	.	.	.	.	.	.	.
Vv01g01013713001	.	.	.	.	.	.	.	.	.	.	.	.	.	.	.	.	.	.	.	.
Vv01g01013712001	.	.	.	.	.	.	.	.	.	.	.	.	.	.	.	.	.	.	.	.
Vv01g01020241001	Cs7g08580	Cc7g02032	Cx7g019410	Ci7g043990	.	.	.	.	.	.	.	.	.	.	.	.	.	.	.	.
Vv01g01020240001	Cs7g08570	Cc7g02033	Cx7g019420	Ci7g044000	Cm7g279190	.	.	.	.	.	.	.	.	.	.	.	.	.	.	.
Vv01g01020239001	Cs7g08560	Cc7g02034	Cx7g019430	Ci7g044010	.	.	.	.	.	.	.	.	.	.	.	.	.	.	.	.
Vv01g01020238001	.	.	.	.	.	.	.	.	.	.	.	.	.	.	.	.	.	.	.	.
Vv01g01020237001	.	.	.	.	.	.	.	.	.	.	.	.	.	.	.	.	.	.	.	.
Vv01g01020236001	Cs7g08550	Cc7g02035	Cx7g019440	Ci7g044020	.	.	Vv14g01032486001	Cs2g28240	Cc2g00695	Cx2g006430	Ci2g032300	Cm7g075890	Ab2g11449	.	.	.	.	.	.	.
Vv01g01020235001	Cs7g08540	.	.	Ci7g044030	.	.	.	.	.	.	.	.	.	.	.	.	.	.	.	.
Vv01g01020234001	.	Cc7g02036	Cx7g019450	.	.	.	.	.	.	.	.	.	.	.	.	.	.	.	.	.
Vv01g01020233001	Cs7g08520	Cc7g02037	Cx7g019460	Ci7g044040	.	.	.	.	.	.	.	.	.	.	.	.	.	.	.	.
Vv01g01020232001	Cs7g08500	Cc7g02039	Cx7g019480	Ci7g044070	.	.	Vv14g01032492001	Cs2g28340	Cc2g00688	Cx2g006360	Ci2g032230	Cm7g075920	Ab2g11441	.	.	.	.	.	.	.
Vv01g01020231001	Cs7g08490	Cc7g02040	Cx7g019500	Ci7g044080	.	.	.	.	.	.	.	.	.	.	.	.	.	.	.	.
Vv01g01020230001	.	.	.	.	.	.	.	.	.	.	.	.	.	.	.	.	.	.	.	.
Vv01g01020229001	Cs7g08470	Cc7g02041	Cx7g019520	Ci7g044100	.	.	.	.	.	.	.	.	.	.	.	.	.	.	.	.
Vv01g01020228001	Cs7g08460	Cc7g02042	Cx7g019530	Ci7g044110	.	.	.	.	.	.	.	.	.	.	.	.	.	.	.	.
Vv01g01020227001	Cs7g08450	.	.	Ci7g044120	.	.	.	.	.	.	.	.	.	.	.	.	.	.	.	.
Vv01g01020226001	.	.	.	.	.	.	.	.	.	.	.	.	.	.	.	.	.	.	.	.
Vv01g01020224001	.	Cc7g02043	Cx7g019540	.	.	.	Vv14g01032500001	.	.	.	.	.	.	Vv17g01007784001	Cs5g05240	Cc5g00423	Cx5g004770	Ci5g115840	Cm5g134300	Ab5g11191
Vv01g01020223001	Cs7g08440	Cc7g02044	Cx7g019550	Ci7g044130	.	.	.	.	.	.	.	.	.	.	.	.	.	.	.	.
Vv01g01020222001	Cs7g08430	Cc7g02045	Cx7g019560	Ci7g044140	.	.	.	.	.	.	.	.	.	Vv17g01007787001	Cs5g05220	Cc5g00421	Cx5g004750	Ci5g115530	Cm5g134280	Ab5g11033
Vv01g01020220001	Cs7g08420	Cc7g02046	Cx7g019580	Ci7g044150	.	.	.	.	.	.	.	.	.	.	.	.	.	.	.	.
Vv01g01020219001	Cs7g08410	Cc7g02047	Cx7g019590	Ci7g044160	Cm7g270450	.	Vv14g01032503001	Cs2g28420	Cc2g00680	Cx2g006280	Ci2g032160	Cm7g076020	Ab2g11416	.	.	.	.	.	.	.
Vv01g01020217001	Cs7g08400	Cc7g02048	Cx7g019600	Ci7g044170	Cm7g270440	.	.	.	.	.	.	.	.	.	.	.	.	.	.	.
Vv01g01020216001	.	.	.	.	.	.	.	.	.	.	.	.	.	.	.	.	.	.	.	.
Vv01g01020215001	Cs7g08390	Cc7g02049	Cx7g019610	Ci7g044180	.	.	.	.	.	.	.	.	.	Vv17g01007789001	Cs5g05200	Cc5g00419	Cx5g004730	Ci5g115550	Cm5g134260	Ab5g10867
Vv01g01020213001	.	.	.	.	.	.	.	.	.	.	.	.	.	.	.	.	.	.	.	.
Vv01g01020210001	.	.	.	.	.	.	.	.	.	.	.	.	.	.	.	.	.	.	.	.
Vv01g01020209001	.	.	.	.	.	.	.	.	.	.	.	.	.	.	.	.	.	.	.	.
Vv01g01020208001	Cs7g08380	Cc7g02050	Cx7g019620	Ci7g044190	Cm7g289500	.	Vv14g01032504001	Cs2g28430	Cc2g00679	Cx2g006200	Ci2g032150	Cm7g076040	Ab2g11375	.	.	.	.	.	.	.
Vv01g01020207001	Cs7g08370	Cc7g02051	Cx7g019630	Ci7g044200	Cm7g312820	.	.	.	.	.	.	.	.	.	.	.	.	.	.	.
Vv01g01020206001	Cs7g08340	Cc7g02054	Cx7g019680	Ci7g044250	.	.	.	.	.	.	.	.	.	.	.	.	.	.	.	.
Vv01g01020205001	Cs7g08330	Cc7g02055	Cx7g019690	Ci7g044260	.	.	.	.	.	.	.	.	.	Vv17g01007796001	.	.	.	.	.	.
Vv01g01020204001	Cs7g08320	Cc7g02060	Cx7g019710	Ci7g044280	Cm7g305990	.	.	.	.	.	.	.	.	.	.	.	.	.	.	.
Vv01g01020202001	.	.	.	.	.	.	Vv14g01032521001	.	.	.	.	.	.	Vv17g01007806001	Cs5g05100	Cc5g00411	Cx5g004630	.	.	Ab5g11022
Vv01g01020198001	.	.	.	.	.	.	.	.	.	.	.	.	.	.	.	.	.	.	.	.
Vv01g01020196001	.	.	.	.	.	.	.	.	.	.	.	.	.	.	.	.	.	.	.	.
Vv01g01020195001	.	.	.	.	.	.	.	.	.	.	.	.	.	.	.	.	.	.	.	.
Vv01g01020194001	.	.	.	.	.	.	.	.	.	.	.	.	.	.	.	.	.	.	.	.
Vv01g01020193001	.	.	.	.	.	.	.	.	.	.	.	.	.	.	.	.	.	.	.	.
Vv01g01020191001	Cs7g04850	.	Cx7g019720	Ci7g069590	Cm7g218980	Ab7g27821	.	.	.	.	.	.	.	.	.	.	.	.	.	.
Vv01g01020190001	Cs7g08300	.	Cx7g019730	Ci7g044300	Cm7g076160	.	.	.	.	.	.	.	.	.	.	.	.	.	.	.
Vv01g01020189001	Cs7g08290	.	Cx7g019740	Ci7g044310	Cm7g076150	.	.	.	.	.	.	.	.	.	.	.	.	.	.	.
Vv01g01020187001	Cs7g08280	.	Cx7g019750	Ci7g044320	Cm7g076140	.	.	.	.	.	.	.	.	.	.	.	.	.	.	.
Vv01g01020186001	.	.	.	.	.	.	.	.	.	.	.	.	.	.	.	.	.	.	.	.
Vv01g01020185001	Cs7g08270	Cc7g02061	Cx7g019760	Ci7g044330	Cm7g076130	.	.	.	.	.	.	.	.	.	.	.	.	.	.	.
Vv01g01020183001	Cs7g08260	Cc7g02062	Cx7g019770	Ci7g044340	.	.	.	.	.	.	.	.	.	.	.	.	.	.	.	.
Vv01g01020182001	.	.	.	.	.	.	.	.	.	.	.	.	.	.	.	.	.	.	.	.
Vv01g01020181001	Cs7g08240	Cc7g02064	Cx7g019790	Ci7g044360	.	.	.	.	.	.	.	.	.	.	.	.	.	.	.	.
Vv01g01020179001	.	.	.	.	.	.	.	.	.	.	.	.	.	.	.	.	.	.	.	.
Vv01g01020178001	.	.	.	.	.	.	Vv14g01032528001	.	Cc6g01977	Cx6g023440	.	.	.	Vv17g01007817001	Cs5g04980	Cc5g00401	Cx5g004540	.	Cm5g134080	Ab5g10769
Vv01g01020177001	.	.	.	.	.	.	.	.	.	.	.	.	.	.	.	.	.	.	.	.
Vv01g01020175001	.	.	.	.	.	.	.	.	.	.	.	.	.	.	.	.	.	.	.	.
Vv01g01020174001	.	.	.	.	.	.	.	.	.	.	.	.	.	.	.	.	.	.	.	.
Vv01g01020172001	.	.	.	.	.	.	.	.	.	.	.	.	.	.	.	.	.	.	.	.
Vv01g01020171001	.	.	.	.	.	.	.	.	.	.	.	.	.	.	.	.	.	.	.	.
Vv01g01020170001	Cs7g08160	Cc7g02072	Cx7g019900	Ci7g044470	.	.	.	.	.	.	.	.	.	.	.	.	.	.	.	.
Vv01g01020169001	.	.	.	.	.	.	.	.	.	.	.	.	.	.	.	.	.	.	.	.
Vv01g01020168001	.	.	.	.	.	.	.	.	.	.	.	.	.	.	.	.	.	.	.	.
Vv01g01020167001	.	.	.	.	.	.	.	.	.	.	.	.	.	.	.	.	.	.	.	.
Vv01g01020166001	Cs7g08140	Cc7g02075	Cx7g019920	Ci7g044490	.	.	.	.	.	.	.	.	.	.	.	.	.	.	.	.
Vv01g01020165001	.	.	.	.	.	.	.	.	.	.	.	.	.	.	.	.	.	.	.	.
Vv01g01020164001	.	.	.	.	.	.	.	.	.	.	.	.	.	.	.	.	.	.	.	.
Vv01g01020163001	.	.	.	.	.	.	.	.	.	.	.	.	.	.	.	.	.	.	.	.
Vv01g01020162001	.	.	.	.	.	.	.	.	.	.	.	.	.	.	.	.	.	.	.	.
Vv01g01020160001	.	.	.	.	.	.	.	.	.	.	.	.	.	.	.	.	.	.	.	.
Vv01g01020159001	Cs7g08080	Cc7g02081	Cx7g019990	Ci7g044560	.	.	.	.	.	.	.	.	.	.	.	.	.	.	.	.
Vv01g01020157001	Cs7g08050	Cc7g02083	Cx7g020010	Ci7g044580	.	.	.	.	.	.	.	.	.	.	.	.	.	.	.	.
Vv01g01020155001	Cs7g08030	Cc7g02084	Cx7g020020	Ci7g044590	.	.	.	.	.	.	.	.	.	.	.	.	.	.	.	.
Vv01g01020154001	Cs7g08020	Cc7g02085	Cx7g020040	Ci7g044610	.	.	Vv14g01032539001	.	Cc6g01970	Cx6g023360	.	.	.	Vv17g01007821001	.	.	.	.	.	.
Vv01g01020152001	.	.	.	.	.	.	.	.	.	.	.	.	.	.	.	.	.	.	.	.
Vv01g01020151001	Cs7g07990	Cc7g02088	Cx7g020060	Ci7g044640	.	.	Vv14g01032545001	Cs6g20080	Cc6g01964	Cx6g023310	Ci6g045810	Cm6g038480	Ab6g23097	.	.	.	.	.	.	.
Vv01g01020148001	Cs7g07960	Cc7g02091	.	.	.	.	.	.	.	.	.	.	.	.	.	.	.	.	.	.
Vv01g01020147001	Cs7g07950	Cc7g02092	Cx7g020090	Ci7g044670	.	.	.	.	.	.	.	.	.	.	.	.	.	.	.	.
Vv01g01020146001	Cs7g07940	Cc7g02093	Cx7g020100	Ci7g044680	.	.	.	.	.	.	.	.	.	Vv17g01007835001	Cs5g04810	Cc5g00385	Cx5g004380	Ci5g115910	Cm5g133900	Ab5g11012
Vv01g01020145001	Cs7g07930	Cc7g02094	Cx7g020110	Ci7g044690	.	Ab7g13334	.	.	.	.	.	.	.	Vv17g01007836001	Cs5g04800	Cc5g00384	Cx5g004360	Ci5g115920	Cm5g133890	.
Vv01g01020143001	Cs7g07920	Cc7g02095	Cx7g020120	Ci7g044700	.	.	.	.	.	.	.	.	.	.	.	.	.	.	.	.
Vv01g01020142001	Cs7g07910	Cc7g02096	Cx7g020130	Ci7g044710	.	.	.	.	.	.	.	.	.	.	.	.	.	.	.	.
Vv01g01020141001	Cs7g07900	Cc7g02097	Cx7g020140	Ci7g044720	.	.	.	.	.	.	.	.	.	.	.	.	.	.	.	.
Vv01g01020140001	.	.	.	.	.	.	.	.	.	.	.	.	.	.	.	.	.	.	.	.
Vv01g01020139001	Cs7g07890	Cc7g02098	Cx7g020150	Ci7g044730	.	.	.	.	.	.	.	.	.	.	.	.	.	.	.	.
Vv01g01020137001	Cs7g07880	Cc7g02099	Cx7g020160	Ci7g044740	.	.	.	.	.	.	.	.	.	.	.	.	.	.	.	.
Vv01g01020136001	Cs7g07870	Cc7g02100	Cx7g020170	Ci7g044750	.	.	.	.	.	.	.	.	.	Vv17g01007839001	.	.	.	.	.	.
Vv01g01020135001	Cs7g07860	Cc7g02101	Cx7g020180	Ci7g044760	.	.	.	.	.	.	.	.	.	.	.	.	.	.	.	.
Vv01g01020134001	Cs7g07850	Cc7g02102	Cx7g020190	.	.	.	.	.	.	.	.	.	.	.	.	.	.	.	.	.
Vv01g01020133001	Cs7g07840	Cc7g01411	Cx7g020200	.	.	.	.	.	.	.	.	.	.	.	.	.	.	.	.	.
Vv01g01020132001	Cs7g07830	Cc7g02104	Cx7g020210	.	.	.	.	.	.	.	.	.	.	Vv17g01007843001	.	Cc5g00377	Cx5g004290	.	.	.
Vv01g01020131001	.	.	.	.	.	.	.	.	.	.	.	.	.	.	.	.	.	.	.	.
Vv01g01020129001	Cs7g04770	Cc7g02106	Cx7g020250	Ci7g014680	.	Ab7g15534	.	.	.	.	.	.	.	.	.	.	.	.	.	.
Vv01g01020128001	Cs7g04760	Cc7g02107	Cx7g020260	Ci7g014690	.	Ab7g15326	Vv14g01032569001	.	.	.	.	.	.	Vv17g01008096001	Cs5g04660	Cc5g00371	Cx5g004200	Ci5g092580	Cm5g133710	Ab5g11276
Vv01g01020127001	.	.	.	.	.	.	.	.	.	.	.	.	.	.	.	.	.	.	.	.
Vv01g01020126001	Cs7g04740	Cc7g02109	Cx7g020280	Ci7g014710	.	Ab7g15285	.	.	.	.	.	.	.	Vv17g01008095001	Cs5g04650	Cc5g00370	Cx5g004190	Ci5g116070	Cm5g133700	Ab5g11233
Vv01g01020123001	.	.	.	.	.	.	.	.	.	.	.	.	.	.	.	.	.	.	.	.
Vv01g01020122001	Cs7g04710	Cc7g02112	Cx7g020310	Ci7g014740	.	Ab7g15165	.	.	.	.	.	.	.	.	.	.	.	.	.	.
Vv01g01020121001	Cs7g04700	Cc7g02113	Cx7g020320	Ci7g014750	.	Ab7g15144	.	.	.	.	.	.	.	Vv17g01008093001	Cs5g04620	Cc5g00366	Cx5g004140	Ci5g116110	Cm5g133670	Ab5g11008
Vv01g01020120001	.	.	.	.	.	.	.	.	.	.	.	.	.	.	.	.	.	.	.	.
Vv01g01020118001	Cs7g04690	Cc7g02114	Cx7g020330	.	.	.	.	.	.	.	.	.	.	.	.	.	.	.	.	.
Vv01g01020116001	Cs7g04670	Cc7g02117	Cx7g020340	Ci7g014770	Cm7g230870	Ab7g14925	.	.	.	.	.	.	.	.	.	.	.	.	.	.
Vv01g01020115001	.	.	.	.	.	.	.	.	.	.	.	.	.	.	.	.	.	.	.	.
Vv01g01020114001	.	Cc7g02120	Cx7g020370	.	.	.	.	.	.	.	.	.	.	.	.	.	.	.	.	.
Vv01g01020113001	.	.	.	.	.	.	.	.	.	.	.	.	.	.	.	.	.	.	.	.
Vv01g01020112001	Cs7g04650	.	.	Ci7g014790	.	Ab7g14933	.	.	.	.	.	.	.	.	.	.	.	.	.	.
Vv01g01020111001	Cs7g04630	Cc7g02121	Cx7g020380	Ci7g014810	.	Ab7g15040	.	.	.	.	.	.	.	Vv17g01008089001	Cs5g04580	Cc5g00362	Cx5g003890	Ci5g116160	Cm5g133630	Ab5g11256
Vv01g01020110001	.	Cc7g02122	Cx7g020390	.	.	.	.	.	.	.	.	.	.	.	.	.	.	.	.	.
Vv01g01020109001	.	.	.	.	.	.	.	.	.	.	.	.	.	.	.	.	.	.	.	.
Vv01g01020108001	.	.	.	.	.	.	.	.	.	.	.	.	.	.	.	.	.	.	.	.
Vv01g01020107001	.	.	.	.	.	.	.	.	.	.	.	.	.	.	.	.	.	.	.	.
Vv01g01020106001	.	.	.	.	.	.	Vv14g01032590001	Cs6g20500	Cc6g02004	Cx6g023740	Ci6g045390	Cm6g038870	Ab6g23192	.	.	.	.	.	.	.
Vv01g01020105001	.	.	.	.	.	.	.	.	.	.	.	.	.	Vv17g01008086001	Cs5g04490	Cc5g00352	.	Ci5g240600	Cm5g013750	Ab5g10968
Vv01g01020104001	.	.	.	.	.	.	.	.	.	.	.	.	.	.	.	.	.	.	.	.
Vv01g01020103001	Cs7g04600	Cc7g02124	.	.	.	Ab7g14983	.	.	.	.	.	.	.	.	.	.	.	.	.	.
Vv01g01020100001	Cs7g04580	Cc7g02126	Cx7g020430	Ci7g014860	Cm7g287790	.	.	.	.	.	.	.	.	.	.	.	.	.	.	.
Vv01g01020098001	.	.	.	.	.	.	.	.	.	.	.	.	.	.	.	.	.	.	.	.
Vv01g01020097001	.	.	.	.	.	.	.	.	.	.	.	.	.	.	.	.	.	.	.	.
Vv01g01020095001	.	.	.	.	.	.	.	.	.	.	.	.	.	.	.	.	.	.	.	.
Vv01g01020093001	Cs7g04540	Cc7g02129	Cx7g020460	Ci7g014890	Cm7g115440	Ab7g15424	Vv14g01032593001	Cs6g20540	Cc6g02008	Cx6g023780	Ci6g045350	Cm6g038920	Ab6g23186	.	.	.	.	.	.	.
Vv01g01020091001	.	.	.	.	.	.	.	.	.	.	.	.	.	.	.	.	.	.	.	.
Vv01g01020090001	Cs7g04530	Cc7g02131	Cx7g020490	Ci7g069940	Cm7g115470	Ab7g14843	.	.	.	.	.	.	.	Vv17g01008076001	Cs5g04370	Cc5g00342	Cx5g003620	Ci5g240710	.	Ab5g11095
Vv01g01020089001	Cs7g04520	Cc7g02132	Cx7g020500	Ci7g014910	Cm7g115480	Ab7g15052	Vv14g01032600001	Cs6g20580	Cc6g02012	Cx6g023830	Ci6g045300	Cm6g038950	Ab6g23172	.	.	.	.	.	.	.
Vv01g01020088001	Cs7g04510	Cc7g02133	Cx7g020510	Ci7g014920	Cm7g115490	Ab7g15001	.	.	.	.	.	.	.	.	.	.	.	.	.	.
Vv01g01020087001	Cs7g04500	Cc7g02134	Cx7g020520	Ci7g014930	Cm7g115500	Ab7g14918	.	.	.	.	.	.	.	.	.	.	.	.	.	.
Vv01g01020084001	.	.	.	.	.	.	.	.	.	.	.	.	.	.	.	.	.	.	.	.
Vv01g01020082001	Cs7g04470	Cc7g02138	Cx7g020560	Ci7g014970	Cm7g115540	Ab7g15405	.	.	.	.	.	.	.	.	.	.	.	.	.	.
Vv01g01020081001	Cs7g04450	Cc7g02140	.	Ci7g014990	Cm7g115560	Ab7g15078	.	.	.	.	.	.	.	.	.	.	.	.	.	.
Vv01g01020080001	Cs7g04440	Cc7g02141	Cx7g020580	Ci7g015000	Cm7g115570	Ab7g15059	.	.	.	.	.	.	.	.	.	.	.	.	.	.
Vv01g01020079001	Cs7g04430	Cc7g02142	Cx7g020590	Ci7g015010	Cm7g115580	Ab7g15332	.	.	.	.	.	.	.	.	.	.	.	.	.	.
Vv01g01020078001	Cs7g04410	Cc7g02143	Cx7g020600	Ci7g015020	Cm7g115590	Ab7g15100	.	.	.	.	.	.	.	Vv17g01008065001	Cs5g04290	Cc5g00335	Cx5g003510	Ci5g240800	.	Ab5g11178
Vv01g01020076001	.	.	.	.	.	.	.	.	.	.	.	.	.	.	.	.	.	.	.	.
Vv01g01020075001	Cs7g04370	Cc7g02147	Cx7g020640	Ci7g015060	Cm7g115650	Ab7g15471	.	.	.	.	.	.	.	.	.	.	.	.	.	.
Vv01g01020074001	Cs7g04360	Cc7g02148	Cx7g020650	Ci7g015070	Cm7g115660	Ab7g14926	.	.	.	.	.	.	.	.	.	.	.	.	.	.
Vv01g01020073001	.	.	.	.	.	.	.	.	.	.	.	.	.	.	.	.	.	.	.	.
Vv01g01020072001	Cs7g04340	Cc7g02150	Cx7g020680	Ci7g015090	Cm7g115680	Ab7g15189	.	.	.	.	.	.	.	.	.	.	.	.	.	.
Vv01g01020071001	Cs7g04330	Cc7g02151	.	.	Cm7g115690	Ab7g15020	.	.	.	.	.	.	.	Vv17g01008060001	Cs5g04260	Cc5g00332	Cx5g003470	Ci5g299150	.	Ab5g11124
Vv01g01020070001	Cs7g04320	Cc7g02152	Cx7g020690	Ci7g015100	Cm7g115700	Ab7g15437	Vv14g01011346001	Cs6g20640	Cc6g02017	Cx6g023890	Ci6g045240	Cm6g039030	Ab6g23187	Vv17g01008059001	Cs5g04250	Cc5g00331	Cx5g003440	Ci5g091190	.	Ab5g11157
Vv01g01020069001	Cs7g04310	Cc7g02153	Cx7g020700	Ci7g015110	Cm7g115710	Ab7g15302	.	.	.	.	.	.	.	.	.	.	.	.	.	.
Vv01g01020068001	.	Cc7g01408	.	.	.	.	.	.	.	.	.	.	.	.	.	.	.	.	.	.
Vv01g01020067001	.	.	.	.	.	.	Vv14g01011348001	Cs6g20720	Cc6g02024	Cx6g023970	.	Cm6g039090	.	Vv17g01008053001	Cs5g04220	Cc5g00328	Cx5g003410	Ci5g091230	.	Ab5g11106
Vv01g01020066001	Cs7g04300	Cc7g02154	.	Ci7g015120	Cm7g294410	Ab7g14921	Vv14g01011350001	Cs6g20790	Cc6g02028	Cx6g024130	Ci6g045180	Cm6g039170	Ab6g23144	.	.	.	.	.	.	.
Vv01g01020065001	Cs7g04290	Cc7g02155	Cx7g020710	Ci7g015130	Cm7g115720	Ab7g15090	.	.	.	.	.	.	.	.	.	.	.	.	.	.
Vv01g01020063001	Cs7g04280	Cc7g02156	Cx7g020720	Ci7g015140	Cm7g115730	Ab7g15522	.	.	.	.	.	.	.	.	.	.	.	.	.	.
Vv01g01020061001	Cs7g04270	Cc7g02157	Cx7g020730	Ci7g015150	Cm7g115740	Ab7g14895	.	.	.	.	.	.	.	.	.	.	.	.	.	.
Vv01g01020060001	Cs7g04260	Cc7g02158	Cx7g020740	Ci7g015170	Cm7g115750	Ab7g15354	Vv14g01011356001	Cs6g20850	Cc6g02035	Cx6g024200	Ci6g045100	Cm6g039260	Ab6g23143	Vv17g01008046001	Cs5g04160	Cc5g00322	Cx5g003350	Ci5g091290	.	Ab5g10755
Vv01g01020059001	Cs7g04240	Cc7g02160	Cx7g020760	Ci7g015190	Cm7g115770	Ab7g15128	.	.	.	.	.	.	.	.	.	.	.	.	.	.
Vv01g01020058001	.	.	.	.	.	.	.	.	.	.	.	.	.	.	.	.	.	.	.	.
Vv01g01020057001	.	.	.	.	.	.	.	.	.	.	.	.	.	.	.	.	.	.	.	.
Vv01g01020056001	Cs7g04220	Cc7g02162	Cx7g020780	Ci7g015200	Cm7g115790	Ab7g15089	Vv14g01011359001	.	.	.	.	.	.	Vv17g01008045001	Cs5g04150	Cc5g00321	Cx5g003340	Ci5g311660	.	Ab5g11245
Vv01g01020055001	.	.	.	.	.	.	.	.	.	.	.	.	.	.	.	.	.	.	.	.
Vv01g01020054001	Cs7g04200	Cc7g02164	Cx7g020800	Ci7g015220	Cm7g115810	Ab7g15015	Vv14g01011360001	.	.	.	.	.	.	Vv17g01008043001	Cs5g04130	Cc5g00319	Cx5g003320	Ci5g091350	.	Ab5g10771
Vv01g01020052001	.	.	.	.	.	.	.	.	.	.	.	.	.	.	.	.	.	.	.	.
Vv01g01020051001	.	.	.	.	.	.	.	.	.	.	.	.	.	.	.	.	.	.	.	.
Vv01g01020050001	.	.	.	.	.	.	.	.	.	.	.	.	.	.	.	.	.	.	.	.
Vv01g01020048001	Cs7g04190	.	.	Ci7g015240	Cm7g115820	.	Vv14g01011364001	.	.	.	.	.	.	.	.	.	.	.	.	.
Vv01g01020046001	.	Cc7g02165	Cx7g020810	.	.	.	Vv14g01011368001	.	.	.	.	.	.	.	.	.	.	.	.	.
Vv01g01020043001	Cs7g04170	Cc7g02169	Cx7g020840	Ci7g015280	Cm7g115850	Ab7g15515	.	.	.	.	.	.	.	Vv17g01008037001	Cs5g04090	Cc5g00315	Cx5g003270	Ci5g091400	.	Ab5g11208
Vv01g01020042001	.	.	.	.	.	.	.	.	.	.	.	.	.	.	.	.	.	.	.	.
Vv01g01020041001	.	.	.	.	.	.	.	.	.	.	.	.	.	.	.	.	.	.	.	.
Vv01g01020040001	Cs7g04140	Cc7g02172	Cx7g020870	Ci7g015300	Cm7g115880	Ab7g15083	.	.	.	.	.	.	.	.	.	.	.	.	.	.
Vv01g01020039001	.	.	.	.	.	.	.	.	.	.	.	.	.	.	.	.	.	.	.	.
Vv01g01020038001	Cs7g04130	Cc7g02173	Cx7g020880	Ci7g015310	Cm7g115890	Ab7g14795	.	.	.	.	.	.	.	.	.	.	.	.	.	.
Vv01g01020033001	Cs7g04110	Cc7g02175	Cx7g020900	Ci7g015330	Cm7g115910	Ab7g15488	Vv14g01011377001	.	.	.	.	.	.	.	.	.	.	.	.	.
Vv01g01020031001	Cs7g04100	Cc7g02176	Cx7g020910	Ci7g015340	Cm7g115920	Ab7g15505	.	.	.	.	.	.	.	.	.	.	.	.	.	.
Vv01g01020030001	Cs7g04090	Cc7g02177	Cx7g020920	Ci7g015360	Cm7g115930	Ab7g15336	Vv14g01011379001	.	.	.	.	.	.	.	.	.	.	.	.	.
Vv01g01020029001	.	.	.	.	.	.	.	.	.	.	.	.	.	.	.	.	.	.	.	.
Vv01g01020027001	Cs7g04080	Cc7g02178	Cx7g020930	Ci7g015370	Cm7g115940	Ab7g15051	Vv14g01011380001	Cs6g21120	.	Cx6g024730	Ci6g044900	Cm6g039490	Ab6g23149	Vv17g01008034001	Cs5g04070	Cc5g00313	Cx5g003250	Ci5g091430	.	Ab5g11050
Vv01g01020026001	.	.	.	.	.	.	.	.	.	.	.	.	.	.	.	.	.	.	.	.
Vv01g01020024001	Cs7g04070	Cc7g02179	Cx7g020940	Ci7g015380	Cm7g115950	Ab7g15117	.	.	.	.	.	.	.	.	.	.	.	.	.	.
Vv01g01020023001	Cs7g04050	Cc7g01380	Cx7g020950	Ci7g015390	Cm7g115960	Ab7g14810	.	.	.	.	.	.	.	Vv17g01008033001	Cs5g04060	Cc5g00312	Cx5g003240	Ci5g288580	.	Ab5g11061
Vv01g01020020001	Cs7g04030	Cc7g02183	Cx7g020970	Ci7g069990	Cm7g115980	.	Vv14g01011384001	.	.	.	.	.	.	Vv17g01008028001	.	.	.	.	.	.
Vv01g01020018001	.	.	.	.	.	.	.	.	.	.	.	.	.	.	.	.	.	.	.	.
Vv01g01020016001	.	.	.	.	.	.	.	.	.	.	.	.	.	.	.	.	.	.	.	.
Vv01g01020015001	.	.	.	.	.	.	.	.	.	.	.	.	.	.	.	.	.	.	.	.
Vv01g01020014001	Cs7g04000	Cc7g02186	Cx7g020990	Ci7g015430	Cm7g116010	Ab7g15391	.	.	.	.	.	.	.	Vv17g01008027001	Cs5g04010	.	Cx5g003180	Ci5g091500	.	Ab5g11110
Vv01g01020013001	.	.	.	.	.	.	.	.	.	.	.	.	.	.	.	.	.	.	.	.
Vv01g01020012001	Cs7g03990	Cc7g02187	Cx7g021000	Ci7g015440	Cm7g116020	Ab7g14876	.	.	.	.	.	.	.	Vv17g01008026001	.	Cc5g00305	.	.	.	.
Vv01g01020011001	Cs7g03980	Cc7g02188	Cx7g021010	Ci7g015450	Cm7g116030	Ab7g14803	.	.	.	.	.	.	.	Vv17g01008023001	Cs5g03980	Cc5g00302	Cx5g003150	Ci5g091530	.	Ab5g10982
Vv01g01020010001	Cs7g03970	Cc7g02189	Cx7g021020	Ci7g015460	Cm7g116040	Ab7g15151	.	.	.	.	.	.	.	.	.	.	.	.	.	.
Vv01g01020008001	Cs7g03940	Cc7g02190	Cx7g021030	Ci7g015470	Cm7g116050	Ab7g15046	Vv14g01011387001	.	.	.	.	.	.	.	.	.	.	.	.	.
Vv01g01020006001	Cs7g03930	Cc7g02191	.	Ci7g015480	Cm7g116060	Ab7g15451	.	.	.	.	.	.	.	.	.	.	.	.	.	.
Vv01g01020005001	Cs7g03920	Cc7g02192	Cx7g021040	Ci7g015490	Cm7g116070	Ab7g15239	.	.	.	.	.	.	.	.	.	.	.	.	.	.
Vv01g01020003001	Cs7g03910	.	Cx7g021050	Ci7g015500	Cm7g116080	Ab7g15045	.	.	.	.	.	.	.	.	.	.	.	.	.	.
Vv01g01020002001	Cs7g03900	Cc7g02193	Cx7g021060	Ci7g015510	Cm7g116090	Ab7g15160	.	.	.	.	.	.	.	.	.	.	.	.	.	.
Vv01g01020001001	.	.	.	.	.	.	.	.	.	.	.	.	.	.	.	.	.	.	.	.
Vv01g01020000001	Cs7g03890	Cc7g02194	Cx7g021070	Ci7g015520	Cm7g116100	Ab7g14834	.	.	.	.	.	.	.	.	.	.	.	.	.	.
Vv01g01019999001	.	.	.	.	.	.	.	.	.	.	.	.	.	.	.	.	.	.	.	.
Vv01g01019998001	Cs7g03880	Cc7g02195	Cx7g021080	Ci7g015530	Cm7g116110	Ab7g14970	.	.	.	.	.	.	.	Vv17g01008021001	Cs5g03950	Cc5g00299	Cx5g003110	Ci5g091560	.	Ab5g10731
Vv01g01019997001	Cs7g03870	Cc7g02196	Cx7g021090	Ci7g015540	Cm7g116120	Ab7g14927	.	.	.	.	.	.	.	Vv17g01008020001	Cs5g03940	Cc5g00298	Cx5g003100	Ci5g091570	.	Ab5g10998
Vv01g01019995001	Cs7g03860	Cc7g02197	Cx7g021100	Ci7g015550	Cm7g116130	Ab7g14860	.	.	.	.	.	.	.	.	.	.	.	.	.	.
Vv01g01019993001	.	.	.	.	.	.	.	.	.	.	.	.	.	.	.	.	.	.	.	.
Vv01g01019989001	.	.	.	.	.	.	.	.	.	.	.	.	.	.	.	.	.	.	.	.
Vv01g01019988001	.	Cc7g01348	.	.	.	.	.	.	.	.	.	.	.	.	.	.	.	.	.	.
Vv01g01019987001	.	Cc7g01323	.	.	.	.	.	.	.	.	.	.	.	.	.	.	.	.	.	.
Vv01g01019985001	Cs7g03840	Cc7g02200	Cx7g021120	Ci7g015580	Cm7g116150	Ab7g15375	.	.	.	.	.	.	.	.	.	.	.	.	.	.
Vv01g01019984001	Cs7g03830	Cc7g02201	Cx7g021130	Ci7g015590	Cm7g116160	Ab7g15389	.	.	.	.	.	.	.	.	.	.	.	.	.	.
Vv01g01019982001	Cs7g03820	Cc7g02202	Cx7g021140	Ci7g015610	Cm7g116170	Ab7g15124	.	.	.	.	.	.	.	.	.	.	.	.	.	.
Vv01g01019981001	.	.	.	.	.	.	Vv14g01011415001	.	.	.	.	.	.	.	.	.	.	.	.	.
Vv01g01019980001	.	.	.	.	.	.	.	.	.	.	.	.	.	.	.	.	.	.	.	.
Vv01g01019978001	Cs7g03800	Cc7g02206	.	.	.	Ab7g15139	.	.	.	.	.	.	.	Vv17g01008001001	Cs5g10700	Cc5g00972	Cx5g010210	.	.	Ab5g25526
Vv01g01019977001	Cs7g03790	Cc7g02207	Cx7g021160	Ci7g015630	Cm7g116190	Ab7g15243	.	.	.	.	.	.	.	.	.	.	.	.	.	.
Vv01g01019976001	Cs7g03780	Cc7g02208	Cx7g021170	Ci7g015640	Cm7g116200	Ab7g15282	.	.	.	.	.	.	.	.	.	.	.	.	.	.
Vv01g01019975001	.	.	.	.	.	.	.	.	.	.	.	.	.	.	.	.	.	.	.	.
Vv01g01019974001	Cs7g03770	Cc7g02211	Cx7g021200	.	Cm7g116220	Ab7g15464	.	.	.	.	.	.	.	.	.	.	.	.	.	.
Vv01g01019973001	Cs7g03750	Cc7g02212	Cx7g021210	Ci7g015660	Cm7g116260	Ab7g14892	Vv14g01011424001	Cs6g21350	Cc6g02081	Cx6g024960	Ci6g077420	Cm6g039710	Ab6g13698	.	.	.	.	.	.	.
Vv01g01019972001	Cs7g03720	Cc7g02215	Cx7g021240	Ci7g015700	Cm7g116280	Ab7g14845	.	.	.	.	.	.	.	.	.	.	.	.	.	.
Vv01g01019971001	Cs7g03680	Cc7g02218	Cx7g021270	Ci7g015720	Cm7g116310	Ab7g15196	.	.	.	.	.	.	.	.	.	.	.	.	.	.
Vv01g01019969001	Cs7g03670	Cc7g02219	Cx7g021280	Ci7g015730	.	Ab7g15034	Vv14g01011433001	Cs6g21400	Cc6g02087	Cx6g025010	Ci6g077370	Cm6g039780	Ab6g13732	Vv17g01007992001	Cs5g10770	Cc5g00979	Cx5g010290	Ci5g281110	.	Ab5g25449
Vv01g01019967001	Cs7g03660	Cc7g02220	Cx7g021290	Ci7g015740	Cm7g010460	Ab7g15153	.	.	.	.	.	.	.	.	.	.	.	.	.	.
Vv01g01019965001	Cs7g03630	Cc7g02223	Cx7g021320	Ci7g015770	Cm7g010490	.	Vv14g01011437001	Cs6g21460	Cc6g02094	Cx6g025070	Ci6g077330	Cm6g039840	.	Vv17g01007987001	Cs5g10820	Cc5g00986	Cx5g010350	.	Cm5g270960	.
Vv01g01019962001	.	.	.	.	.	.	.	.	.	.	.	.	.	.	.	.	.	.	.	.
Vv01g01019959001	Cs7g03610	Cc7g02225	Cx7g021330	.	Cm7g010510	Ab7g15501	.	.	.	.	.	.	.	.	.	.	.	.	.	.
Vv01g01019958001	Cs7g03600	Cc7g02226	Cx7g021340	Ci7g015780	Cm7g010520	Ab7g15293	Vv14g01011439001	Cs6g21480	Cc6g02096	Cx6g025090	Ci6g077310	Cm6g039860	Ab6g13713	.	.	.	.	.	.	.
Vv01g01019957001	Cs7g03590	Cc7g02227	Cx7g021350	Ci7g015790	Cm7g010530	Ab7g15180	.	.	.	.	.	.	.	.	.	.	.	.	.	.
Vv01g01019956001	.	.	.	.	.	.	.	.	.	.	.	.	.	.	.	.	.	.	.	.
Vv01g01019955001	Cs7g03580	Cc7g02229	Cx7g021370	.	.	Ab7g15058	.	.	.	.	.	.	.	.	.	.	.	.	.	.
Vv01g01019954001	.	.	.	.	.	.	.	.	.	.	.	.	.	Vv17g01007984001	.	Cc5g00990	Cx5g010390	.	.	.
Vv01g01019953001	.	.	.	.	.	.	.	.	.	.	.	.	.	.	.	.	.	.	.	.
Vv01g01019952001	.	.	.	.	.	.	.	.	.	.	.	.	.	.	.	.	.	.	.	.
Vv01g01019950001	Cs7g03550	Cc7g02231	Cx7g021390	.	.	.	.	.	.	.	.	.	.	.	.	.	.	.	.	.
Vv01g01019948001	Cs7g03540	Cc7g02233	Cx7g021410	Ci7g015850	Cm7g010590	Ab7g15081	.	.	.	.	.	.	.	.	.	.	.	.	.	.
Vv01g01019947001	.	.	.	.	.	.	.	.	.	.	.	.	.	.	.	.	.	.	.	.
Vv01g01019946001	Cs7g03530	Cc7g02234	Cx7g021420	Ci7g015860	Cm7g010600	Ab7g14992	.	.	.	.	.	.	.	.	.	.	.	.	.	.
Vv01g01019945001	.	.	.	.	.	.	.	.	.	.	.	.	.	.	.	.	.	.	.	.
Vv01g01019943001	Cs7g11780	.	.	.	.	.	.	.	.	.	.	.	.	.	.	.	.	.	.	.
Vv01g01012474001	.	.	.	.	.	.	.	.	.	.	.	.	.	.	.	.	.	.	.	.
Vv01g01012475001	.	.	.	.	.	.	.	.	.	.	.	.	.	.	.	.	.	.	.	.
Vv01g01012477001	.	.	.	.	.	.	.	.	.	.	.	.	.	.	.	.	.	.	.	.
Vv01g01012479001	.	Cc7g01689	Cx7g015800	.	.	.	.	.	.	.	.	.	.	.	.	.	.	.	.	.
Vv01g01012480001	.	.	.	.	.	.	.	.	.	.	.	.	.	.	.	.	.	.	.	.
Vv01g01012484001	.	.	.	.	.	.	.	.	.	.	.	.	.	.	.	.	.	.	.	.
Vv01g01012486001	.	.	.	.	.	.	.	.	.	.	.	.	.	.	.	.	.	.	.	.
Vv01g01012487001	.	.	.	.	.	.	.	.	.	.	.	.	.	.	.	.	.	.	.	.
Vv01g01012488001	.	.	.	.	.	.	.	.	.	.	.	.	.	.	.	.	.	.	.	.
Vv01g01012489001	.	.	.	.	.	.	.	.	.	.	.	.	.	.	.	.	.	.	.	.
Vv01g01012490001	.	.	.	.	.	.	.	.	.	.	.	.	.	.	.	.	.	.	.	.
Vv01g01012491001	.	.	.	.	.	.	.	.	.	.	.	.	.	.	.	.	.	.	.	.
Vv01g01012493001	.	.	.	.	.	.	.	.	.	.	.	.	.	.	.	.	.	.	.	.
Vv01g01012494001	.	.	.	.	.	.	.	.	.	.	.	.	.	Vv17g01007964001	.	Cc5g01010	Cx5g010610	.	.	.
Vv01g01012495001	.	.	.	.	.	.	.	.	.	.	.	.	.	.	.	.	.	.	.	.
Vv01g01012496001	.	.	.	.	.	.	.	.	.	.	.	.	.	.	.	.	.	.	.	.
Vv01g01003214001	.	.	.	.	.	.	.	.	.	.	.	.	.	.	.	.	.	.	.	.
Vv01g01003215001	.	.	.	.	.	.	.	.	.	.	.	.	.	.	.	.	.	.	.	.
Vv01g01003216001	.	.	.	.	.	.	.	.	.	.	.	.	.	.	.	.	.	.	.	.
Vv01g01003217001	.	.	.	.	.	.	.	.	.	.	.	.	.	.	.	.	.	.	.	.
Vv01g01003219001	Cs7g03490	Cc7g02241	Cx7g021480	Ci7g015950	Cm7g010660	Ab7g15109	Vv14g01011452001	.	.	.	.	.	.	.	.	.	.	.	.	.
Vv01g01003220001	.	.	.	.	.	.	.	.	.	.	.	.	.	.	.	.	.	.	.	.
Vv01g01003222001	Cs7g03470	Cc7g02243	Cx7g021500	Ci7g015970	Cm7g010680	Ab7g15105	Vv14g01011453001	Cs6g21560	Cc6g02104	Cx6g025180	Ci6g077230	Cm6g163880	Ab6g20207	.	.	.	.	.	.	.
Vv01g01003225001	.	.	Cx7g021510	.	.	.	.	.	.	.	.	.	.	.	.	.	.	.	.	.
Vv01g01003226001	.	.	.	.	.	.	.	.	.	.	.	.	.	.	.	.	.	.	.	.
Vv01g01003228001	.	.	.	.	.	.	.	.	.	.	.	.	.	.	.	.	.	.	.	.
Vv01g01003229001	.	.	.	.	.	.	.	.	.	.	.	.	.	.	.	.	.	.	.	.
Vv01g01010058001	.	.	.	.	.	.	.	.	.	.	.	.	.	.	.	.	.	.	.	.
Vv01g01010060001	.	.	.	.	.	.	.	.	.	.	.	.	.	.	.	.	.	.	.	.
Vv01g01010061001	.	.	.	.	.	.	.	.	.	.	.	.	.	.	.	.	.	.	.	.
Vv01g01010063001	.	.	.	.	.	.	.	.	.	.	.	.	.	.	.	.	.	.	.	.
Vv01g01010064001	.	.	.	.	.	.	.	.	.	.	.	.	.	.	.	.	.	.	.	.
Vv01g01010068001	Cs7g15090	Cc7g01450	.	Ci7g063200	.	Ab7g11609	.	.	.	.	.	.	.	.	.	.	.	.	.	.
Vv01g01010071001	.	.	.	.	.	.	.	.	.	.	.	.	.	.	.	.	.	.	.	.
Vv01g01010073001	.	.	.	.	.	.	.	.	.	.	.	.	.	.	.	.	.	.	.	.
Vv01g01010075001	.	.	.	.	.	.	.	.	.	.	.	.	.	.	.	.	.	.	.	.
Vv01g01010076001	.	.	.	.	.	.	.	.	.	.	.	.	.	.	.	.	.	.	.	.
Vv01g01010078001	.	.	.	.	.	.	.	.	.	.	.	.	.	.	.	.	.	.	.	.
Vv01g01010080001	.	.	.	.	.	.	.	.	.	.	.	.	.	.	.	.	.	.	.	.
Vv01g01010083001	.	.	.	.	.	.	.	.	.	.	.	.	.	.	.	.	.	.	.	.
Vv01g01010086001	.	.	.	.	.	.	.	.	.	.	.	.	.	.	.	.	.	.	.	.
Vv01g01010088001	.	.	.	.	.	.	.	.	.	.	.	.	.	.	.	.	.	.	.	.
Vv01g01010089001	.	Cc7g02269	Cx7g021770	.	.	.	.	.	.	.	.	.	.	.	.	.	.	.	.	.
Vv01g01010090001	.	.	.	.	.	.	.	.	.	.	.	.	.	.	.	.	.	.	.	.
Vv01g01010091001	.	.	.	.	.	.	Vv14g01011478001	.	.	.	.	.	.	.	.	.	.	.	.	.
Vv01g01010095001	.	.	.	.	.	.	.	.	.	.	.	.	.	.	.	.	.	.	.	.
Vv01g01010096001	.	.	Cx7g013460	.	.	.	.	.	.	.	.	.	.	Vv17g01007953001	Cs5g11290	Cc5g01019	Cx5g010730	Ci5g257350	Cm5g093690	.
Vv01g01010097001	Cs7g03260	.	.	Ci7g016230	Cm7g010920	Ab7g15312	.	.	.	.	.	.	.	.	.	.	.	.	.	.
Vv01g01010098001	.	.	.	.	.	.	.	.	.	.	.	.	.	.	.	.	.	.	.	.
Vv01g01010100001	Cs7g12020	Cc7g01688	Cx7g015780	Ci7g037370	Cm7g259110	Ab7g34359	.	.	.	.	.	.	.	.	.	.	.	.	.	.
Vv01g01010101001	.	.	.	.	.	.	.	.	.	.	.	.	.	.	.	.	.	.	.	.
Vv01g01010102001	.	.	.	.	.	.	.	.	.	.	.	.	.	.	.	.	.	.	.	.
Vv01g01010103001	.	.	.	.	.	.	.	.	.	.	.	.	.	.	.	.	.	.	.	.
Vv01g01010104001	.	.	.	.	.	.	.	.	.	.	.	.	.	.	.	.	.	.	.	.
Vv01g01010106001	.	.	.	.	.	.	.	.	.	.	.	.	.	.	.	.	.	.	.	.
Vv01g01010108001	Cs7g12040	Cc7g01687	Cx7g015760	Ci7g037390	Cm7g259140	Ab7g34166	.	.	.	.	.	.	.	.	.	.	.	.	.	.
Vv01g01010109001	Cs7g12050	Cc9g01088	Cx7g015750	Ci7g037400	Cm7g259150	Ab7g34391	.	.	.	.	.	.	.	.	.	.	.	.	.	.
Vv01g01010110001	.	.	.	.	.	.	.	.	.	.	.	.	.	.	.	.	.	.	.	.
Vv01g01010112001	.	.	.	.	.	.	.	.	.	.	.	.	.	.	.	.	.	.	.	.
Vv01g01010114001	.	.	.	.	.	.	.	.	.	.	.	.	.	.	.	.	.	.	.	.
Vv01g01010115001	.	.	.	.	.	.	.	.	.	.	.	.	.	.	.	.	.	.	.	.
Vv01g01010116001	.	.	.	.	.	.	.	.	.	.	.	.	.	.	.	.	.	.	.	.
Vv01g01010118001	Cs7g12120	Cc7g01679	Cx7g015660	Ci7g037480	Cm7g252790	Ab7g34294	.	.	.	.	.	.	.	.	.	.	.	.	.	.
Vv01g01010120001	Cs7g12130	Cc9g01232	Cx7g015650	Ci7g037490	Cm7g252800	Ab7g34197	.	.	.	.	.	.	.	.	.	.	.	.	.	.
Vv01g01010122001	Cs7g12140	Cc7g01677	Cx7g015640	Ci7g037500	Cm7g252810	Ab7g34265	.	.	.	.	.	.	.	.	.	.	.	.	.	.
Vv01g01010123001	Cs7g12150	Cc7g01676	Cx7g015630	Ci7g037510	Cm7g252820	Ab7g34336	.	.	.	.	.	.	.	.	.	.	.	.	.	.
Vv01g01010124001	Cs7g12160	Cc7g01675	Cx7g015620	Ci7g037520	Cm7g252830	Ab7g34406	.	.	.	.	.	.	.	.	.	.	.	.	.	.
Vv01g01010125001	.	.	.	.	.	.	.	.	.	.	.	.	.	.	.	.	.	.	.	.
Vv01g01010126001	Cs7g12170	Cc7g01673	Cx7g015600	Ci7g037530	Cm7g252860	Ab7g34392	.	.	.	.	.	.	.	.	.	.	.	.	.	.
Vv01g01010127001	Cs7g12180	Cc7g01672	Cx7g015590	Ci7g037540	Cm7g252870	Ab7g34194	.	.	.	.	.	.	.	.	.	.	.	.	.	.
Vv01g01010131001	.	.	.	.	.	.	.	.	.	.	.	.	.	.	.	.	.	.	.	.
Vv01g01010134001	.	.	.	.	.	.	.	.	.	.	.	.	.	.	.	.	.	.	.	.
Vv01g01010138001	.	.	.	.	.	.	.	.	.	.	.	.	.	.	.	.	.	.	.	.
Vv01g01010139001	Cs7g12250	Cc7g01664	Cx7g015480	Ci7g275300	Cm7g037130	Ab7g34238	.	.	.	.	.	.	.	.	.	.	.	.	.	.
Vv01g01010141001	.	.	.	.	.	.	.	.	.	.	.	.	.	.	.	.	.	.	.	.
Vv01g01010142001	.	.	.	.	.	.	.	.	.	.	.	.	.	.	.	.	.	.	.	.
Vv01g01010143001	.	.	.	.	.	.	.	.	.	.	.	.	.	.	.	.	.	.	.	.
Vv01g01010145001	.	.	.	.	.	.	.	.	.	.	.	.	.	.	.	.	.	.	.	.
Vv01g01010149001	Cs7g12310	Cc7g01661	Cx7g015450	Ci7g274770	Cm7g037160	Ab7g34381	.	.	.	.	.	.	.	.	.	.	.	.	.	.
Vv01g01010152001	.	.	.	.	.	.	.	.	.	.	.	.	.	.	.	.	.	.	.	.
Vv01g01010153001	Cs7g15080	Cc7g01449	.	Ci7g063190	Cm7g052600	Ab7g11630	.	.	.	.	.	.	.	.	.	.	.	.	.	.
Vv01g01010154001	Cs7g12430	.	.	Ci7g267180	Cm7g037290	Ab7g34226	.	.	.	.	.	.	.	.	.	.	.	.	.	.
Vv01g01010156001	.	.	.	.	.	.	.	.	.	.	.	.	.	.	.	.	.	.	.	.
Vv01g01010157001	.	.	.	.	.	.	.	.	.	.	.	.	.	.	.	.	.	.	.	.
Vv01g01010159001	.	.	.	.	.	.	.	.	.	.	.	.	.	.	.	.	.	.	.	.
Vv01g01010160001	.	.	.	.	.	.	.	.	.	.	.	.	.	.	.	.	.	.	.	.
Vv01g01010161001	.	Cc7g01654	Cx7g015360	.	.	.	.	.	.	.	.	.	.	.	.	.	.	.	.	.
Vv01g01010162001	.	.	.	.	.	.	.	.	.	.	.	.	.	.	.	.	.	.	.	.
Vv01g01010164001	.	.	.	.	.	.	.	.	.	.	.	.	.	.	.	.	.	.	.	.
Vv01g01010166001	.	.	.	.	.	.	.	.	.	.	.	.	.	.	.	.	.	.	.	.
Vv01g01010168001	.	.	.	.	.	.	.	.	.	.	.	.	.	.	.	.	.	.	.	.
Vv01g01010169001	.	.	.	.	.	.	.	.	.	.	.	.	.	.	.	.	.	.	.	.
Vv01g01010170001	.	.	.	.	.	.	.	.	.	.	.	.	.	.	.	.	.	.	.	.
Vv01g01010171001	.	.	.	.	.	.	.	.	.	.	.	.	.	.	.	.	.	.	.	.
Vv01g01010176001	.	.	.	.	.	.	.	.	.	.	.	.	.	.	.	.	.	.	.	.
Vv01g01010179001	.	.	Cx7g013450	.	.	.	.	.	.	.	.	.	.	.	.	.	.	.	.	.
Vv01g01010180001	Cs7g15070	Cc7g01448	Cx7g013440	.	.	Ab7g11598	.	.	.	.	.	.	.	.	.	.	.	.	.	.
Vv01g01010181001	Cs7g15060	Cc7g01447	Cx7g013430	Ci7g063180	Cm7g052610	Ab7g11636	.	.	.	.	.	.	.	.	.	.	.	.	.	.
Vv01g01010182001	.	.	.	.	.	.	.	.	.	.	.	.	.	.	.	.	.	.	.	.
Vv01g01010184001	Cs7g15030	Cc7g01444	Cx7g013400	Ci7g063150	Cm7g052640	Ab7g11583	.	.	.	.	.	.	.	.	.	.	.	.	.	.
Vv01g01010186001	.	Cc9g01085	.	.	.	.	.	.	.	.	.	.	.	.	.	.	.	.	.	.
Vv01g01010187001	Cs7g15000	Cc7g01441	Cx7g013380	Ci7g063120	Cm7g052670	Ab7g11605	.	.	.	.	.	.	.	.	.	.	.	.	.	.
Vv01g01010189001	Cs7g14970	Cc7g01439	Cx7g013360	Ci7g063100	Cm7g052690	Ab7g11588	.	.	.	.	.	.	.	.	.	.	.	.	.	.
Vv01g01010193001	.	.	.	.	.	.	.	.	.	.	.	.	.	.	.	.	.	.	.	.
Vv01g01010196001	.	.	.	.	.	.	.	.	.	.	.	.	.	.	.	.	.	.	.	.
Vv01g01010197001	.	.	.	.	.	.	.	.	.	.	.	.	.	.	.	.	.	.	.	.
Vv01g01010198001	.	.	.	.	.	.	.	.	.	.	.	.	.	.	.	.	.	.	.	.
Vv01g01010202001	.	.	.	.	.	.	.	.	.	.	.	.	.	.	.	.	.	.	.	.
Vv01g01010204001	.	.	.	.	.	.	.	.	.	.	.	.	.	.	.	.	.	.	.	.
Vv01g01010205001	Cs7g14960	Cc9g01202	Cx7g013350	Ci7g062970	Cm7g291360	Ab7g12616	.	.	.	.	.	.	.	.	.	.	.	.	.	.
Vv01g01010206001	.	Cc7g01433	.	.	.	.	.	.	.	.	.	.	.	.	.	.	.	.	.	.
Vv01g01010208001	.	.	.	.	.	.	.	.	.	.	.	.	.	.	.	.	.	.	.	.
Vv01g01010209001	.	Cc7g01427	.	.	.	.	.	.	.	.	.	.	.	.	.	.	.	.	.	.
Vv01g01010210001	.	Cc7g01428	.	.	.	.	.	.	.	.	.	.	.	.	.	.	.	.	.	.
Vv01g01010212001	.	.	.	.	.	.	.	.	.	.	.	.	.	.	.	.	.	.	.	.
Vv01g01010213001	.	.	.	.	.	.	.	.	.	.	.	.	.	.	.	.	.	.	.	.
Vv01g01010214001	Cs7g14950	Cc9g01160	Cx7g013340	Ci7g062950	Cm7g052720	Ab7g11645	.	.	.	.	.	.	.	Vv17g01008483001	.	.	.	.	.	.
Vv01g01010215001	.	.	.	.	.	.	.	.	.	.	.	.	.	.	.	.	.	.	.	.
Vv01g01010216001	.	.	.	.	.	.	.	.	.	.	.	.	.	.	.	.	.	.	.	.
Vv01g01010217001	.	.	.	.	.	.	.	.	.	.	.	.	.	.	.	.	.	.	.	.
Vv01g01010218001	.	.	.	.	.	.	.	.	.	.	.	.	.	.	.	.	.	.	.	.
Vv01g01010221001	.	Cc7g01894	.	.	.	.	.	.	.	.	.	.	.	.	.	.	.	.	.	.
Vv01g01010222001	.	.	.	.	.	.	.	.	.	.	.	.	.	.	.	.	.	.	.	.
Vv01g01010223001	.	.	.	.	.	.	.	.	.	.	.	.	.	.	.	.	.	.	.	.
Vv01g01010224001	.	.	.	.	.	.	.	.	.	.	.	.	.	.	.	.	.	.	.	.
Vv01g01010225001	.	Cc9g01084	.	.	.	.	.	.	.	.	.	.	.	.	.	.	.	.	.	.
Vv01g01010226001	.	.	.	.	.	.	.	.	.	.	.	.	.	.	.	.	.	.	.	.
Vv01g01010227001	Cs7g14930	.	Cx7g013320	Ci7g062930	Cm7g052740	Ab7g11575	.	.	.	.	.	.	.	.	.	.	.	.	.	.
Vv01g01010228001	.	.	.	.	.	.	.	.	.	.	.	.	.	.	.	.	.	.	.	.
Vv01g01010230001	.	.	.	.	.	.	.	.	.	.	.	.	.	.	.	.	.	.	.	.
Vv01g01010231001	.	Cc9g01082	.	.	.	.	.	.	.	.	.	.	.	.	.	.	.	.	.	.
Vv01g01010232001	.	Cc9g01081	.	.	.	.	.	.	.	.	.	.	.	.	.	.	.	.	.	.
Vv01g01010233001	.	.	.	.	.	.	.	.	.	.	.	.	.	.	.	.	.	.	.	.
Vv01g01010238001	.	Cc9g01088	.	.	.	.	.	.	.	.	.	.	.	.	.	.	.	.	.	.
Vv01g01010239001	.	.	.	.	.	.	.	.	.	.	.	.	.	.	.	.	.	.	.	.
Vv01g01010240001	.	.	.	.	.	.	.	.	.	.	.	.	.	.	.	.	.	.	.	.
Vv01g01010242001	.	Cc9g01090	.	.	.	.	.	.	.	.	.	.	.	.	.	.	.	.	.	.
Vv01g01010243001	.	Cc9g01093	.	.	.	.	.	.	.	.	.	.	.	.	.	.	.	.	.	.
Vv01g01010244001	.	.	.	.	.	.	.	.	.	.	.	.	.	.	.	.	.	.	.	.
Vv01g01010248001	.	Cc9g01098	.	.	.	.	.	.	.	.	.	.	.	.	.	.	.	.	.	.
Vv01g01010249001	.	.	.	.	.	.	.	.	.	.	.	.	.	.	.	.	.	.	.	.
Vv01g01010251001	.	Cc9g01101	.	.	.	.	.	.	.	.	.	.	.	.	.	.	.	.	.	.
Vv01g01010252001	.	.	.	.	.	.	Vv14g01003984001	Cs2g23970	Cc2g01229	Cx2g013050	Ci2g141050	Cm7g073760	.	.	.	.	.	.	.	.
Vv01g01010254001	.	.	.	.	.	.	.	.	.	.	.	.	.	.	.	.	.	.	.	.
Vv01g01010256001	.	.	.	.	.	.	.	.	.	.	.	.	.	.	.	.	.	.	.	.
Vv01g01010257001	.	.	.	.	.	.	.	.	.	.	.	.	.	.	.	.	.	.	.	.
Vv01g01010258001	.	Cc7g01452	.	.	.	.	.	.	.	.	.	.	.	.	.	.	.	.	.	.
Vv01g01010259001	.	.	.	.	.	.	.	.	.	.	.	.	.	.	.	.	.	.	.	.
Vv01g01010260001	.	.	.	.	.	.	.	.	.	.	.	.	.	.	.	.	.	.	.	.
Vv01g01010261001	.	.	.	.	.	.	.	.	.	.	.	.	.	.	.	.	.	.	.	.
Vv01g01010262001	.	.	.	.	.	.	.	.	.	.	.	.	.	.	.	.	.	.	.	.
Vv01g01010264001	.	.	.	.	.	.	.	.	.	.	.	.	.	.	.	.	.	.	.	.
Vv01g01010266001	.	.	.	.	.	.	.	.	.	.	.	.	.	.	.	.	.	.	.	.
Vv01g01010267001	.	.	.	.	.	.	.	.	.	.	.	.	.	.	.	.	.	.	.	.
Vv01g01010268001	.	.	.	.	.	.	.	.	.	.	.	.	.	.	.	.	.	.	.	.
Vv01g01010269001	.	.	.	.	.	.	.	.	.	.	.	.	.	.	.	.	.	.	.	.
Vv01g01010270001	.	.	.	.	.	.	.	.	.	.	.	.	.	.	.	.	.	.	.	.
Vv01g01010271001	.	.	.	.	.	.	.	.	.	.	.	.	.	.	.	.	.	.	.	.
Vv01g01010272001	.	.	.	.	.	.	.	.	.	.	.	.	.	.	.	.	.	.	.	.
Vv01g01010274001	.	Cc9g01114	.	.	.	.	.	.	.	.	.	.	.	.	.	.	.	.	.	.
Vv01g01010275001	.	.	.	.	.	.	.	.	.	.	.	.	.	.	.	.	.	.	.	.
Vv01g01010276001	.	Cc9g01115	.	.	.	.	.	.	.	.	.	.	.	.	.	.	.	.	.	.
Vv01g01010278001	.	.	.	.	.	.	.	.	.	.	.	.	.	.	.	.	.	.	.	.
Vv01g01010280001	.	Cc9g01116	.	.	.	.	.	.	.	.	.	.	.	.	.	.	.	.	.	.
Vv01g01010282001	Cs7g14700	Cc9g01117	Cx7g013120	Ci7g062700	Cm7g052960	Ab7g11582	.	.	.	.	.	.	.	.	.	.	.	.	.	.
Vv01g01010283001	.	.	.	.	.	.	.	.	.	.	.	.	.	Vv17g01008486001	.	.	.	.	.	.
Vv01g01010284001	.	Cc9g01118	.	.	.	.	.	.	.	.	.	.	.	.	.	.	.	.	.	.
Vv01g01010289001	.	.	.	.	.	.	.	.	.	.	.	.	.	.	.	.	.	.	.	.
Vv01g01010290001	.	Cc9g01120	.	.	.	.	.	.	.	.	.	.	.	.	.	.	.	.	.	.
Vv01g01010291001	.	Cc9g01123	.	.	.	.	.	.	.	.	.	.	.	.	.	.	.	.	.	.
Vv01g01010292001	.	Cc7g01893	Cx7g017890	.	.	.	.	.	.	.	.	.	.	.	.	.	.	.	.	.
Vv01g01010294001	.	Cc7g01891	Cx7g017870	.	.	.	.	.	.	.	.	.	.	.	.	.	.	.	.	.
Vv01g01010295001	.	Cc7g01890	.	.	.	.	.	.	.	.	.	.	.	.	.	.	.	.	.	.
Vv01g01010296001	.	Cc7g01889	Cx7g017860	.	.	.	.	.	.	.	.	.	.	.	.	.	.	.	.	.
Vv01g01010297001	.	Cc7g01888	Cx7g017850	.	.	.	.	.	.	.	.	.	.	Vv17g01007553001	.	.	.	.	.	.
Vv01g01010298001	.	.	.	.	.	.	.	.	.	.	.	.	.	.	.	.	.	.	.	.
Vv01g01010299001	.	Cc7g01886	Cx7g017830	.	.	.	.	.	.	.	.	.	.	.	.	.	.	.	.	.
Vv01g01010300001	.	Cc7g01885	Cx7g017820	.	.	.	.	.	.	.	.	.	.	Vv17g01007549001	.	.	.	.	.	.
Vv01g01010301001	.	Cc7g01884	Cx7g017810	.	.	.	Vv14g01003969001	Cs2g24330	Cc2g01211	Cx2g012700	.	Cm7g073530	.	.	.	.	.	.	.	.
Vv01g01010302001	.	.	.	.	.	.	.	.	.	.	.	.	.	.	.	.	.	.	.	.
Vv01g01010303001	.	.	.	.	.	.	.	.	.	.	.	.	.	.	.	.	.	.	.	.
Vv01g01010304001	.	.	.	.	.	.	Vv14g01003964001	Cs2g24440	Cc2g01202	Cx2g012610	.	Cm7g073480	.	.	.	.	.	.	.	.
Vv01g01010305001	.	.	.	.	.	.	.	.	.	.	.	.	.	.	.	.	.	.	.	.
Vv01g01010306001	.	Cc7g01881	Cx7g017780	.	.	.	.	.	.	.	.	.	.	.	.	.	.	.	.	.
Vv01g01010307001	.	.	.	.	.	.	.	.	.	.	.	.	.	.	.	.	.	.	.	.
Vv01g01010308001	.	.	.	.	.	.	.	.	.	.	.	.	.	.	.	.	.	.	.	.
Vv01g01010309001	.	Cc7g01878	.	.	.	.	.	.	.	.	.	.	.	.	.	.	.	.	.	.
Vv01g01010311001	.	.	.	.	.	.	.	.	.	.	.	.	.	.	.	.	.	.	.	.
Vv01g01010312001	.	.	.	.	.	.	.	.	.	.	.	.	.	.	.	.	.	.	.	.
Vv01g01010314001	.	Cc7g01877	Cx7g017750	.	.	.	.	.	.	.	.	.	.	.	.	.	.	.	.	.
Vv01g01010316001	.	Cc7g01875	Cx7g017730	.	.	.	.	.	.	.	.	.	.	.	.	.	.	.	.	.
Vv01g01010318001	.	Cc7g01874	Cx7g017720	.	.	.	Vv14g01001852001	Cs2g24480	Cc2g01201	Cx2g012600	Ci2g273440	Cm7g073470	.	.	.	.	.	.	.	.
Vv01g01010319001	.	Cc7g01872	Cx7g017710	.	.	.	.	.	.	.	.	.	.	.	.	.	.	.	.	.
Vv01g01010320001	.	Cc7g01871	Cx7g017700	.	.	.	.	.	.	.	.	.	.	.	.	.	.	.	.	.
Vv01g01010321001	.	Cc7g01870	Cx7g017690	.	.	.	Vv14g01001846001	Cs2g24550	Cc2g01196	Cx2g012540	Ci2g075500	Cm7g073440	Ab2g26632	.	.	.	.	.	.	.
Vv01g01010322001	.	.	.	.	.	.	.	.	.	.	.	.	.	.	.	.	.	.	.	.
Vv01g01010323001	.	Cc7g01869	Cx7g017670	.	.	.	.	.	.	.	.	.	.	.	.	.	.	.	.	.
Vv01g01010324001	.	Cc7g01868	Cx7g017660	.	.	.	.	.	.	.	.	.	.	Vv17g01007522001	.	.	.	.	.	.
Vv01g01010325001	.	Cc7g01867	Cx7g017650	.	.	.	.	.	.	.	.	.	.	.	.	.	.	.	.	.
Vv01g01010326001	.	.	.	.	.	.	.	.	.	.	.	.	.	.	.	.	.	.	.	.
Vv01g01010327001	.	Cc7g01865	Cx7g017620	.	.	.	.	.	.	.	.	.	.	.	.	.	.	.	.	.
Vv01g01010328001	.	Cc7g01864	Cx7g017610	.	.	.	.	.	.	.	.	.	.	Vv17g01007521001	Cs5g06870	Cc5g00597	Cx5g006480	.	Cm5g020370	Ab5g10897
Vv01g01010329001	.	.	.	.	.	.	.	.	.	.	.	.	.	.	.	.	.	.	.	.
Vv01g01010330001	.	Cc7g01862	Cx7g017580	.	.	.	.	.	.	.	.	.	.	.	.	.	.	.	.	.
Vv01g01010331001	.	Cc7g01861	Cx7g017570	.	.	.	.	.	.	.	.	.	.	.	.	.	.	.	.	.
Vv01g01010333001	.	.	.	.	.	.	.	.	.	.	.	.	.	.	.	.	.	.	.	.
Vv01g01010334001	.	.	.	.	.	.	.	.	.	.	.	.	.	.	.	.	.	.	.	.
Vv01g01010335001	.	.	.	.	.	.	.	.	.	.	.	.	.	.	.	.	.	.	.	.
Vv01g01010336001	.	.	.	.	.	.	.	.	.	.	.	.	.	Vv17g01008496001	Cs5g06970	Cc5g00605	Cx5g006570	.	.	Ab5g10696
Vv01g01010337001	.	.	.	.	.	.	.	.	.	.	.	.	.	.	.	.	.	.	.	.
Vv01g01010338001	.	Cc9g01090	.	.	.	.	.	.	.	.	.	.	.	.	.	.	.	.	.	.
Vv01g01010339001	.	.	.	.	.	.	.	.	.	.	.	.	.	.	.	.	.	.	.	.
Vv01g01010340001	.	.	.	.	.	.	.	.	.	.	.	.	.	.	.	.	.	.	.	.
Vv01g01010341001	.	.	.	.	.	.	.	.	.	.	.	.	.	.	.	.	.	.	.	.
Vv01g01010342001	.	Cc7g01854	Cx7g017500	.	.	.	.	.	.	.	.	.	.	.	.	.	.	.	.	.
Vv01g01010343001	.	.	.	.	.	.	.	.	.	.	.	.	.	.	.	.	.	.	.	.
Vv01g01010345001	.	.	.	.	.	.	.	.	.	.	.	.	.	.	.	.	.	.	.	.
Vv01g01010346001	.	.	.	.	.	.	.	.	.	.	.	.	.	.	.	.	.	.	.	.
Vv01g01010347001	.	.	.	.	.	.	.	.	.	.	.	.	.	.	.	.	.	.	.	.
Vv01g01010349001	.	.	.	.	.	.	.	.	.	.	.	.	.	.	.	.	.	.	.	.
Vv01g01010350001	.	.	.	.	.	.	.	.	.	.	.	.	.	.	.	.	.	.	.	.
Vv01g01010351001	.	.	.	.	.	.	.	.	.	.	.	.	.	.	.	.	.	.	.	.
Vv01g01010352001	.	.	.	.	.	.	.	.	.	.	.	.	.	.	.	.	.	.	.	.
Vv01g01010353001	.	.	.	.	.	.	.	.	.	.	.	.	.	.	.	.	.	.	.	.
Vv01g01010354001	.	.	.	.	.	.	.	.	.	.	.	.	.	.	.	.	.	.	.	.
Vv01g01010355001	.	.	.	.	.	.	.	.	.	.	.	.	.	.	.	.	.	.	.	.
Vv01g01010357001	.	.	.	.	.	.	.	.	.	.	.	.	.	.	.	.	.	.	.	.
Vv01g01010358001	Cs7g04070	Cc7g01849	Cx7g017450	Ci7g015380	Cm7g115950	Ab7g15117	.	.	.	.	.	.	.	Vv17g01008498001	Cs5g06990	Cc5g00607	Cx5g006580	Ci5g247660	.	Ab5g11004
Vv01g01010359001	.	Cc7g01848	Cx7g017440	.	.	.	.	.	.	.	.	.	.	.	.	.	.	.	.	.
Vv01g01010360001	.	Cc7g01847	Cx7g017430	.	.	.	.	.	.	.	.	.	.	.	.	.	.	.	.	.
Vv01g01010361001	.	Cc7g01845	Cx7g017410	.	.	.	.	.	.	.	.	.	.	Vv17g01008505001	Cs5g07070	Cc5g00615	Cx5g006640	Ci5g247720	Cm5g055930	Ab5g11111
Vv01g01010362001	.	Cc7g01844	Cx7g017400	.	.	.	.	.	.	.	.	.	.	.	.	.	.	.	.	.
Vv01g01010363001	.	Cc7g01843	Cx7g017390	.	.	.	.	.	.	.	.	.	.	.	.	.	.	.	.	.
Vv01g01010364001	.	Cc7g01839	Cx7g017340	.	.	.	.	.	.	.	.	.	.	.	.	.	.	.	.	.
Vv01g01010365001	.	Cc7g01838	Cx7g017330	.	.	.	.	.	.	.	.	.	.	.	.	.	.	.	.	.
Vv01g01010366001	.	.	.	.	.	.	.	.	.	.	.	.	.	.	.	.	.	.	.	.
Vv01g01010368001	.	.	.	.	.	.	.	.	.	.	.	.	.	.	.	.	.	.	.	.
Vv01g01010369001	.	.	.	.	.	.	.	.	.	.	.	.	.	.	.	.	.	.	.	.
Vv01g01010370001	.	.	.	.	.	.	.	.	.	.	.	.	.	.	.	.	.	.	.	.
Vv01g01010371001	.	.	.	.	.	.	.	.	.	.	.	.	.	.	.	.	.	.	.	.
Vv01g01010372001	.	Cc7g01835	Cx7g017310	.	.	.	.	.	.	.	.	.	.	.	.	.	.	.	.	.
Vv01g01010373001	.	.	.	.	.	.	.	.	.	.	.	.	.	.	.	.	.	.	.	.
Vv01g01010374001	.	Cc7g01834	Cx7g017290	.	.	.	.	.	.	.	.	.	.	.	.	.	.	.	.	.
Vv01g01010375001	.	Cc7g01833	Cx7g017280	.	.	.	.	.	.	.	.	.	.	.	.	.	.	.	.	.
Vv01g01010376001	.	.	.	.	.	.	.	.	.	.	.	.	.	.	.	.	.	.	.	.
Vv01g01010378001	.	.	.	.	.	.	.	.	.	.	.	.	.	.	.	.	.	.	.	.
Vv01g01010379001	.	.	.	.	.	.	.	.	.	.	.	.	.	.	.	.	.	.	.	.
Vv01g01010380001	.	.	.	.	.	.	.	.	.	.	.	.	.	.	.	.	.	.	.	.
Vv01g01010382001	.	.	.	.	.	.	.	.	.	.	.	.	.	.	.	.	.	.	.	.
Vv01g01010383001	.	.	.	.	.	.	.	.	.	.	.	.	.	.	.	.	.	.	.	.
Vv01g01010384001	.	.	.	.	.	.	.	.	.	.	.	.	.	.	.	.	.	.	.	.
Vv01g01010385001	.	.	.	.	.	.	.	.	.	.	.	.	.	.	.	.	.	.	.	.
Vv01g01010386001	.	.	.	.	.	.	.	.	.	.	.	.	.	.	.	.	.	.	.	.
Vv01g01010387001	.	.	.	.	.	.	.	.	.	.	.	.	.	Vv17g01008516001	Cs5g07160	Cc5g00625	Cx5g006750	Ci5g247820	Cm5g056030	Ab5g11242
Vv01g01010390001	.	Cc7g01828	Cx7g017260	.	.	.	.	.	.	.	.	.	.	.	.	.	.	.	.	.
Vv01g01010391001	.	.	.	.	.	.	.	.	.	.	.	.	.	.	.	.	.	.	.	.
Vv01g01010392001	.	.	.	.	.	.	.	.	.	.	.	.	.	.	.	.	.	.	.	.
Vv01g01010394001	.	.	.	.	.	.	.	.	.	.	.	.	.	.	.	.	.	.	.	.
Vv01g01010395001	.	.	.	.	.	.	.	.	.	.	.	.	.	.	.	.	.	.	.	.
Vv01g01010396001	.	.	.	.	.	.	.	.	.	.	.	.	.	.	.	.	.	.	.	.
Vv01g01010397001	.	.	.	.	.	.	.	.	.	.	.	.	.	.	.	.	.	.	.	.
Vv01g01010403001	.	.	.	.	.	.	.	.	.	.	.	.	.	.	.	.	.	.	.	.
Vv01g01010404001	.	.	.	.	.	.	.	.	.	.	.	.	.	.	.	.	.	.	.	.
Vv01g01010408001	.	.	.	.	.	.	.	.	.	.	.	.	.	.	.	.	.	.	.	.
Vv01g01010412001	.	.	.	.	.	.	.	.	.	.	.	.	.	.	.	.	.	.	.	.
Vv01g01010414001	.	.	.	.	.	.	.	.	.	.	.	.	.	.	.	.	.	.	.	.
Vv01g01010415001	.	.	.	.	.	.	.	.	.	.	.	.	.	.	.	.	.	.	.	.
Vv01g01010416001	.	.	.	.	.	.	.	.	.	.	.	.	.	.	.	.	.	.	.	.
Vv01g01010417001	.	.	.	.	.	.	.	.	.	.	.	.	.	.	.	.	.	.	.	.
Vv01g01010426001	.	.	.	.	.	.	.	.	.	.	.	.	.	.	.	.	.	.	.	.
Vv01g01010429001	.	.	.	.	.	.	.	.	.	.	.	.	.	.	.	.	.	.	.	.
Vv01g01010431001	.	.	.	.	.	.	.	.	.	.	.	.	.	.	.	.	.	.	.	.
Vv01g01010436001	.	.	.	.	.	.	.	.	.	.	.	.	.	.	.	.	.	.	.	.
Vv01g01010437001	.	.	.	.	.	.	.	.	.	.	.	.	.	.	.	.	.	.	.	.
Vv01g01010439001	.	.	.	.	.	.	.	.	.	.	.	.	.	.	.	.	.	.	.	.
Vv01g01010441001	.	Cc7g01825	Cx7g017230	.	.	.	.	.	.	.	.	.	.	.	.	.	.	.	.	.
Vv01g01010442001	.	Cc7g01824	Cx7g017220	.	.	.	.	.	.	.	.	.	.	.	.	.	.	.	.	.
Vv01g01010443001	Cs7g04050	Cc7g02180	Cx7g020950	Ci7g015390	Cm7g115960	Ab7g14810	.	.	.	.	.	.	.	.	.	.	.	.	.	.
Vv01g01010444001	.	.	.	.	.	.	.	.	.	.	.	.	.	.	.	.	.	.	.	.
Vv01g01010446001	.	Cc7g01821	Cx7g017170	.	.	.	.	.	.	.	.	.	.	.	.	.	.	.	.	.
Vv01g01010448001	.	.	Cx7g017160	.	.	.	.	.	.	.	.	.	.	.	.	.	.	.	.	.
Vv01g01010449001	.	Cc7g01820	Cx7g017150	.	.	.	.	.	.	.	.	.	.	Vv17g01008528001	Cs5g07210	Cc5g00630	Cx5g006810	Ci5g247860	Cm5g056080	Ab5g11170
Vv01g01010450001	.	.	.	.	.	.	.	.	.	.	.	.	.	.	.	.	.	.	.	.
Vv01g01010451001	.	.	.	.	.	.	.	.	.	.	.	.	.	.	.	.	.	.	.	.
Vv01g01010452001	.	Cc7g01819	Cx7g017140	.	.	.	.	.	.	.	.	.	.	.	.	.	.	.	.	.
Vv01g01010454001	.	Cc7g01818	Cx7g017130	.	.	.	.	.	.	.	.	.	.	.	.	.	.	.	.	.
Vv01g01010456001	.	.	.	.	.	.	.	.	.	.	.	.	.	.	.	.	.	.	.	.
Vv01g01010457001	.	.	.	.	.	.	.	.	.	.	.	.	.	.	.	.	.	.	.	.
Vv01g01010458001	.	.	.	.	.	.	.	.	.	.	.	.	.	.	.	.	.	.	.	.
Vv01g01010459001	.	.	.	.	.	.	.	.	.	.	.	.	.	.	.	.	.	.	.	.
Vv01g01010461001	.	.	.	.	.	.	.	.	.	.	.	.	.	.	.	.	.	.	.	.
Vv01g01010463001	.	.	.	.	.	.	.	.	.	.	.	.	.	.	.	.	.	.	.	.
Vv01g01010464001	.	.	.	.	.	.	.	.	.	.	.	.	.	.	.	.	.	.	.	.
Vv01g01010466001	.	.	.	.	.	.	.	.	.	.	.	.	.	.	.	.	.	.	.	.
Vv01g01010467001	Cs7g19990	.	.	Ci7g134940	Cm7g309770	.	.	.	.	.	.	.	.	.	.	.	.	.	.	.
Vv01g01010468001	.	.	.	.	.	.	.	.	.	.	.	.	.	.	.	.	.	.	.	.
Vv01g01010469001	.	.	.	.	.	.	.	.	.	.	.	.	.	.	.	.	.	.	.	.
Vv01g01010470001	.	.	.	.	.	.	.	.	.	.	.	.	.	.	.	.	.	.	.	.
Vv01g01010471001	.	Cc7g01817	Cx7g017120	.	.	.	.	.	.	.	.	.	.	.	.	.	.	.	.	.
Vv01g01010473001	.	Cc7g01816	Cx7g017110	.	.	.	.	.	.	.	.	.	.	.	.	.	.	.	.	.
Vv01g01010475001	.	.	.	.	.	.	.	.	.	.	.	.	.	.	.	.	.	.	.	.
Vv01g01010476001	.	.	.	.	.	.	.	.	.	.	.	.	.	.	.	.	.	.	.	.
Vv01g01010477001	.	Cc9g01164	Cx7g017060	.	.	.	.	.	.	.	.	.	.	.	.	.	.	.	.	.
Vv01g01010478001	.	Cc7g01810	Cx7g017050	.	.	.	.	.	.	.	.	.	.	.	.	.	.	.	.	.
Vv01g01010479001	.	.	Cx7g017040	.	.	.	.	.	.	.	.	.	.	.	.	.	.	.	.	.
Vv01g01010480001	.	Cc7g01809	Cx7g017030	.	.	.	.	.	.	.	.	.	.	.	.	.	.	.	.	.
Vv01g01010481001	.	.	.	.	.	.	.	.	.	.	.	.	.	.	.	.	.	.	.	.
Vv01g01010482001	.	.	Cx7g017020	.	.	.	.	.	.	.	.	.	.	.	.	.	.	.	.	.
Vv01g01010483001	.	.	.	.	.	.	.	.	.	.	.	.	.	.	.	.	.	.	.	.
Vv01g01010486001	.	Cc7g01808	Cx7g017010	.	.	.	.	.	.	.	.	.	.	.	.	.	.	.	.	.
Vv01g01010487001	.	Cc7g01805	Cx7g016980	.	.	.	.	.	.	.	.	.	.	.	.	.	.	.	.	.
Vv01g01010488001	.	Cc7g01804	Cx7g016970	.	.	.	.	.	.	.	.	.	.	.	.	.	.	.	.	.
Vv01g01010490001	.	Cc7g01803	Cx7g016960	.	.	.	.	.	.	.	.	.	.	Vv17g01008549001	Cs7g10790	Cc7g00949	Cx7g010100	Ci7g036020	.	.
Vv01g01010491001	.	Cc7g01801	Cx7g016950	.	.	.	.	.	.	.	.	.	.	.	.	.	.	.	.	.
Vv01g01010494001	.	Cc7g01800	Cx7g016930	.	.	.	.	.	.	.	.	.	.	.	.	.	.	.	.	.
Vv01g01010495001	.	Cc7g01799	Cx7g016920	.	.	.	.	.	.	.	.	.	.	.	.	.	.	.	.	.
Vv01g01010496001	.	Cc7g01798	Cx7g016900	.	.	.	.	.	.	.	.	.	.	Vv17g01008556001	Cs7g10830	Cc5g01114	Cx5g011720	Ci7g036090	Cm7g174130	Ab7g37245
Vv01g01010497001	.	Cc7g01797	Cx7g016890	.	.	.	.	.	.	.	.	.	.	.	.	.	.	.	.	.
Vv01g01010498001	.	Cc7g01796	Cx7g016880	.	.	.	.	.	.	.	.	.	.	.	.	.	.	.	.	.
Vv01g01010499001	Cs7g03650	Cc7g02221	Cx7g021300	Ci7g015750	Cm7g010470	Ab7g14909	.	.	.	.	.	.	.	.	.	.	.	.	.	.
Vv01g01010500001	.	Cc7g01795	Cx7g016870	.	.	.	Vv14g01033064001	.	.	.	.	.	.	Vv17g01008568001	.	.	.	.	.	.
Vv01g01010501001	.	Cc7g01794	Cx7g016860	.	.	.	.	.	.	.	.	.	.	.	.	.	.	.	.	.
Vv01g01010502001	.	Cc7g01793	Cx7g016850	.	.	.	.	.	.	.	.	.	.	.	.	.	.	.	.	.
Vv01g01010505001	.	Cc7g01791	Cx7g016830	.	.	.	.	.	.	.	.	.	.	.	.	.	.	.	.	.
Vv01g01010506001	.	.	.	.	.	.	.	.	.	.	.	.	.	.	.	.	.	.	.	.
Vv01g01010507001	.	.	.	.	.	.	.	.	.	.	.	.	.	.	.	.	.	.	.	.
Vv01g01010508001	.	.	.	.	.	.	.	.	.	.	.	.	.	.	.	.	.	.	.	.
Vv01g01010509001	.	.	.	.	.	.	.	.	.	.	.	.	.	.	.	.	.	.	.	.
Vv01g01010510001	.	Cc7g01790	Cx7g016820	.	.	.	.	.	.	.	.	.	.	.	.	.	.	.	.	.
Vv01g01010513001	.	.	.	.	.	.	.	.	.	.	.	.	.	.	.	.	.	.	.	.
Vv01g01010521001	.	Cc7g01785	Cx7g016790	.	.	.	.	.	.	.	.	.	.	.	.	.	.	.	.	.
Vv01g01010522001	.	Cc7g01784	Cx7g016770	.	.	.	Vv14g01033064001	.	.	.	.	.	.	.	.	.	.	.	.	.
Vv01g01010524001	.	Cc7g01781	Cx7g016750	.	.	.	.	.	.	.	.	.	.	.	.	.	.	.	.	.
Vv01g01010525001	Cs7g03300	Cc7g02261	Cx7g021700	Ci7g016170	Cm7g010890	Ab7g15116	Vv14g01033063001	Cs2g25560	Cc2g01106	Cx2g010670	.	Cm2g043420	Ab2g38405	.	.	.	.	.	.	.
Vv01g01010526001	.	Cc7g01779	Cx7g016730	.	.	.	.	.	.	.	.	.	.	.	.	.	.	.	.	.
Vv01g01010528001	.	Cc7g01778	Cx7g016720	.	.	.	Vv14g01033059001	Cs2g25600	Cc2g01102	Cx2g010630	.	Cm2g043390	.	.	.	.	.	.	.	.
Vv01g01010530001	.	.	.	.	.	.	.	.	.	.	.	.	.	.	.	.	.	.	.	.
Vv01g01010531001	.	Cc7g01776	Cx7g016700	.	.	.	.	.	.	.	.	.	.	.	.	.	.	.	.	.
Vv01g01010535001	.	.	.	.	.	.	.	.	.	.	.	.	.	.	.	.	.	.	.	.
Vv01g01004930001	Cs7g19870	.	.	.	.	.	.	.	.	.	.	.	.	.	.	.	.	.	.	.
Vv01g01004931001	Cs7g19850	.	.	Ci7g251650	.	Ab7g28554	.	.	.	.	.	.	.	.	.	.	.	.	.	.
Vv01g01004932001	.	.	.	.	.	.	.	.	.	.	.	.	.	.	.	.	.	.	.	.
Vv01g01004933001	.	.	.	.	.	.	.	.	.	.	.	.	.	.	.	.	.	.	.	.
Vv01g01004935001	Cs7g19820	.	.	Ci7g251620	.	Ab7g28556	.	.	.	.	.	.	.	.	.	.	.	.	.	.
Vv01g01004936001	.	.	.	.	.	.	.	.	.	.	.	.	.	.	.	.	.	.	.	.
Vv01g01004937001	.	.	.	.	.	.	.	.	.	.	.	.	.	.	.	.	.	.	.	.
Vv01g01004938001	.	.	.	.	.	.	.	.	.	.	.	.	.	.	.	.	.	.	.	.
Vv01g01004939001	.	.	.	.	.	.	.	.	.	.	.	.	.	.	.	.	.	.	.	.
Vv01g01004940001	Cs7g19780	.	.	Ci7g251590	.	Ab7g25000	.	.	.	.	.	.	.	.	.	.	.	.	.	.
Vv01g01004941001	.	.	.	.	.	.	.	.	.	.	.	.	.	.	.	.	.	.	.	.
Vv01g01004942001	Cs7g19770	.	Cx5g024960	Ci7g251580	.	Ab7g11747	.	.	.	.	.	.	.	.	.	.	.	.	.	.
Vv01g01004943001	.	Cc9g01163	.	.	.	.	.	.	.	.	.	.	.	.	.	.	.	.	.	.
Vv01g01004944001	.	Cc9g01162	.	.	.	.	.	.	.	.	.	.	.	.	.	.	.	.	.	.
Vv01g01000904001	.	.	.	.	.	.	.	.	.	.	.	.	.	.	.	.	.	.	.	.
Vv01g01000906001	.	Cc7g01774	Cx7g016670	.	.	.	.	.	.	.	.	.	.	.	.	.	.	.	.	.
Vv01g01000907001	.	.	.	.	.	.	.	.	.	.	.	.	.	Vv17g01008573001	Cs7g11080	Cc7g00973	Cx7g010440	Ci7g036360	Cm7g174370	.
Vv01g01000913001	.	.	Cx7g016640	.	.	.	.	.	.	.	.	.	.	.	.	.	.	.	.	.
Vv01g01000914001	.	.	.	.	.	.	.	.	.	.	.	.	.	Vv17g01008578001	.	Cc7g00977	Cx7g010510	.	.	.
Vv01g01000915001	.	.	.	.	.	.	.	.	.	.	.	.	.	Vv17g01008579001	.	Cc7g00978	Cx7g010520	.	.	.
Vv01g01000917001	.	Cc7g01770	Cx7g016620	.	.	.	Vv14g01033053001	Cs2g25650	Cc2g01099	Cx2g010570	.	Cm2g043360	Ab2g38435	Vv17g01008583001	Cs7g11130	Cc7g00980	Cx7g010550	Ci7g036420	Cm7g174430	.
Vv01g01000919001	.	Cc7g01768	Cx7g016600	.	.	.	.	.	.	.	.	.	.	.	.	.	.	.	.	.
Vv01g01000920001	.	Cc7g01767	Cx7g016590	.	.	.	.	.	.	.	.	.	.	.	.	.	.	.	.	.
Vv01g01000921001	.	Cc7g01766	.	.	.	.	Vv14g01033051001	Cs2g25680	Cc2g01096	Cx2g010550	.	Cm2g043330	Ab2g38374	.	.	.	.	.	.	.
Vv01g01000922001	.	.	Cx7g016580	.	.	.	.	.	.	.	.	.	.	.	.	.	.	.	.	.
Vv01g01000923001	.	.	.	.	.	.	.	.	.	.	.	.	.	.	.	.	.	.	.	.
Vv01g01000924001	.	.	.	.	.	.	.	.	.	.	.	.	.	.	.	.	.	.	.	.
Vv01g01000925001	Cs7g03040	Cc7g02289	Cx7g021990	Ci7g016490	Cm7g011170	Ab7g15388	.	.	.	.	.	.	.	.	.	.	.	.	.	.
Vv01g01000927001	.	.	.	.	.	.	.	.	.	.	.	.	.	.	.	.	.	.	.	.
Vv01g01000929001	Cs7g03030	Cc7g02290	Cx7g022000	Ci7g016500	Cm7g011180	Ab7g15012	.	.	.	.	.	.	.	.	.	.	.	.	.	.
Vv01g01000930001	.	.	.	.	.	.	.	.	.	.	.	.	.	.	.	.	.	.	.	.
Vv01g01000932001	Cs7g03000	Cc7g02293	Cx7g022030	Ci7g016530	Cm7g011210	Ab7g14998	.	.	.	.	.	.	.	.	.	.	.	.	.	.
Vv01g01000935001	.	.	.	.	.	.	.	.	.	.	.	.	.	.	.	.	.	.	.	.
Vv01g01000936001	.	.	.	.	.	.	.	.	.	.	.	.	.	.	.	.	.	.	.	.
Vv01g01000937001	.	.	.	.	.	.	.	.	.	.	.	.	.	.	.	.	.	.	.	.
Vv01g01000938001	Cs7g02970	Cc7g02296	Cx7g022060	Ci7g016560	Cm7g011230	Ab7g15519	.	.	.	.	.	.	.	Vv17g01008597001	.	Cc7g00994	Cx7g010660	.	.	.
Vv01g01000939001	Cs7g02960	Cc7g02297	Cx7g022070	Ci7g016570	Cm7g011240	Ab7g15211	.	.	.	.	.	.	.	.	.	.	.	.	.	.
Vv01g01000940001	.	.	.	.	.	.	.	.	.	.	.	.	.	.	.	.	.	.	.	.
Vv01g01000942001	Cs7g02930	Cc7g02301	Cx7g022110	Ci7g016600	Cm7g011270	Ab7g15076	.	.	.	.	.	.	.	.	.	.	.	.	.	.
Vv01g01000943001	.	.	.	.	.	.	.	.	.	.	.	.	.	.	.	.	.	.	.	.
Vv01g01000944001	Cs7g02910	Cc7g02303	Cx7g022120	Ci7g016610	Cm7g011290	Ab7g14967	.	.	.	.	.	.	.	Vv17g01008607001	.	.	.	.	.	.
Vv01g01000945001	.	.	.	.	.	.	.	.	.	.	.	.	.	.	.	.	.	.	.	.
Vv01g01000947001	Cs7g02900	Cc7g02304	Cx7g022130	Ci7g016620	Cm7g011300	Ab7g14947	Vv14g01033030001	Cs2g13940	Cc2g01079	Cx2g010290	.	Cm2g283460	Ab2g38350	.	.	.	.	.	.	.
Vv01g01000948001	.	.	.	.	.	.	.	.	.	.	.	.	.	.	.	.	.	.	.	.
Vv01g01000949001	Cs7g02890	Cc7g02306	Cx7g022150	.	.	.	.	.	.	.	.	.	.	.	.	.	.	.	.	.
Vv01g01000951001	Cs7g02880	Cc7g02307	.	Ci7g016640	Cm7g011360	Ab7g15500	Vv14g01033017001	Cs2g14170	Cc2g01062	Cx2g010020	.	Cm2g137530	Ab2g23695	.	.	.	.	.	.	.
Vv01g01000954001	Cs7g02870	Cc7g02308	Cx7g022160	Ci7g016650	Cm7g011370	Ab7g14790	.	.	.	.	.	.	.	.	.	.	.	.	.	.
Vv01g01000955001	.	.	.	.	.	.	.	.	.	.	.	.	.	.	.	.	.	.	.	.
Vv01g01000957001	Cs7g02860	Cc7g02309	Cx7g022180	Ci7g016660	Cm7g011380	Ab7g15514	.	.	.	.	.	.	.	.	.	.	.	.	.	.
Vv01g01000958001	Cs7g02850	Cc7g02310	Cx7g022190	Ci7g016680	Cm7g011390	Ab7g15401	Vv14g01033015001	Cs2g14240	Cc2g01059	Cx2g009980	.	Cm2g137500	Ab2g38325	.	.	.	.	.	.	.
Vv01g01000959001	.	.	.	.	.	.	.	.	.	.	.	.	.	.	.	.	.	.	.	.
Vv01g01000960001	.	.	.	.	.	.	.	.	.	.	.	.	.	.	.	.	.	.	.	.
Vv01g01000961001	.	.	Cx7g022210	.	.	.	.	.	.	.	.	.	.	.	.	.	.	.	.	.
Vv01g01000962001	.	.	.	.	.	.	Vv14g01033011001	Cs2g14270	Cc2g01056	Cx2g009950	Ci2g286170	Cm2g137470	Ab2g38352	.	.	.	.	.	.	.
Vv01g01000965001	.	.	.	.	.	.	.	.	.	.	.	.	.	.	.	.	.	.	.	.
Vv01g01000967001	Cs7g02820	Cc7g02314	Cx7g022240	Ci7g016710	Cm7g230880	Ab7g15099	.	.	.	.	.	.	.	.	.	.	.	.	.	.
Vv01g01000968001	.	.	.	.	.	.	.	.	.	.	.	.	.	.	.	.	.	.	.	.
Vv01g01000969001	.	.	.	.	.	.	.	.	.	.	.	.	.	.	.	.	.	.	.	.
Vv01g01000970001	Cs7g02800	Cc7g02316	Cx7g022270	Ci7g016720	Cm7g011440	Ab7g14902	.	.	.	.	.	.	.	.	.	.	.	.	.	.
Vv01g01000971001	.	.	.	.	.	.	.	.	.	.	.	.	.	.	.	.	.	.	.	.
Vv01g01001078001	.	.	.	.	.	.	.	.	.	.	.	.	.	.	.	.	.	.	.	.
Vv01g01001079001	Cs7g19750	Cc9g01160	Cx5g024890	Ci7g062950	.	Ab7g25072	.	.	.	.	.	.	.	Vv17g01008640001	Cs7g19750	Cc7g01025	Cx7g011120	Ci7g062950	.	Ab7g25072
Vv01g01001080001	.	Cc9g01157	.	.	.	.	.	.	.	.	.	.	.	.	.	.	.	.	.	.
Vv01g01001081001	Cs7g19700	Cc9g01156	.	.	.	Ab7g24963	.	.	.	.	.	.	.	Vv17g01008644001	Cs7g19700	Cc7g01031	Cx7g011190	.	.	Ab7g24963
Vv01g01001082001	.	Cc9g01151	.	.	.	.	.	.	.	.	.	.	.	.	.	.	.	.	.	.
Vv01g01001083001	.	.	.	.	.	.	Vv14g01032986001	Cs2g14550	Cc2g01024	Cx2g009710	.	.	Ab2g38388	.	.	.	.	.	.	.
Vv01g01001085001	.	.	.	.	.	.	.	.	.	.	.	.	.	.	.	.	.	.	.	.
Vv01g01001086001	Cs7g19680	Cc9g01147	.	.	.	Ab7g24933	.	.	.	.	.	.	.	Vv17g01008646001	Cs7g19680	Cc7g01033	Cx7g011210	.	.	Ab7g24933
Vv01g01001087001	.	Cc9g01146	.	.	.	.	.	.	.	.	.	.	.	.	.	.	.	.	.	.
Vv01g01001088001	.	Cc9g01164	Cx5g024840	.	.	.	Vv14g01032985001	.	.	.	.	.	.	.	.	.	.	.	.	.
Vv01g01001089001	Cs7g19640	Cc9g01165	.	.	.	Ab7g25023	Vv14g01032983001	Cs2g14570	Cc2g01021	Cx2g009690	.	.	Ab2g38365	Vv17g01008649001	Cs7g19640	Cc7g01036	Cx7g011250	.	.	Ab7g25023
Vv01g01001090001	.	Cc9g01166	Cx5g024820	.	.	.	.	.	.	.	.	.	.	.	.	.	.	.	.	.
Vv01g01001091001	Cs7g19610	.	.	.	.	Ab7g24944	.	.	.	.	.	.	.	Vv17g01008653001	Cs7g19610	Cc7g01038	Cx7g011270	.	.	Ab7g24944
Vv01g01001092001	.	Cc9g01169	Cx5g024780	.	.	.	.	.	.	.	.	.	.	Vv17g01008654001	.	.	Cx5g024780	.	.	.
Vv01g01001093001	.	Cc9g01170	Cx5g024770	.	.	.	Vv14g01032981001	Cs2g14600	Cc2g01020	Cx2g009670	.	.	Ab2g38400	.	.	.	.	.	.	.
Vv01g01001094001	Cs7g19500	Cc9g01171	Cx5g024760	.	.	Ab7g24951	.	.	.	.	.	.	.	Vv17g01008660001	Cs7g19500	Cc7g01047	Cx7g011470	.	.	Ab7g24951
Vv01g01001097001	Cs7g19490	Cc9g01174	Cx5g024750	.	.	Ab7g25044	.	.	.	.	.	.	.	Vv17g01008661001	Cs7g19490	Cc7g01048	Cx7g011480	.	.	Ab7g25044
Vv01g01001098001	.	Cc9g01175	Cx5g024740	.	.	.	.	.	.	.	.	.	.	.	.	.	.	.	.	.
Vv01g01001099001	.	Cc9g01176	Cx5g024730	.	.	.	.	.	.	.	.	.	.	.	.	.	.	.	.	.
Vv01g01001101001	.	Cc9g01177	Cx5g024710	.	.	.	.	.	.	.	.	.	.	.	.	.	.	.	.	.
Vv01g01001102001	.	Cc9g01179	Cx5g024690	.	.	.	.	.	.	.	.	.	.	.	.	.	.	.	.	.
Vv01g01001104001	.	.	.	.	.	.	.	.	.	.	.	.	.	.	.	.	.	.	.	.
Vv01g01001105001	.	.	.	.	.	.	.	.	.	.	.	.	.	.	.	.	.	.	.	.
Vv01g01001106001	.	.	.	.	.	.	.	.	.	.	.	.	.	.	.	.	.	.	.	.
Vv01g01001107001	.	Cc9g01181	Cx5g024680	.	.	.	.	.	.	.	.	.	.	.	.	.	.	.	.	.
Vv01g01001108001	Cs7g19470	.	Cx5g024670	.	.	Ab7g25013	.	.	.	.	.	.	.	.	.	.	.	.	.	.
Vv01g01001109001	.	Cc9g01182	.	.	.	.	.	.	.	.	.	.	.	.	.	.	.	.	.	.
Vv01g01001111001	.	Cc9g01184	Cx5g024640	.	.	.	.	.	.	.	.	.	.	.	.	.	.	.	.	.
Vv01g01001112001	.	.	.	.	.	.	.	.	.	.	.	.	.	.	.	.	.	.	.	.
Vv01g01001113001	.	.	.	.	.	.	Vv14g01032964001	Cs2g14750	Cc2g01001	Cx2g009490	Ci2g277930	Cm2g296590	.	.	.	.	.	.	.	.
Vv01g01001114001	.	Cc9g01185	Cx5g024620	.	.	.	Vv14g01032962001	Cs2g14760	Cc2g00999	Cx2g009470	.	.	Ab2g16554	.	.	.	.	.	.	.
Vv01g01001115001	Cs7g02620	Cc9g01187	Cx7g022440	Ci7g016930	Cm7g011610	Ab7g14778	.	.	.	.	.	.	.	.	.	.	.	.	.	.
Vv01g01001116001	.	Cc9g01188	Cx5g024550	.	.	.	.	.	.	.	.	.	.	Vv17g01008665001	.	.	Cx5g024550	.	.	.
Vv01g01001117001	.	Cc9g01192	Cx5g024500	.	.	.	.	.	.	.	.	.	.	.	.	.	.	.	.	.
Vv01g01001118001	.	.	.	.	.	.	Vv14g01032947001	Cs2g14890	Cc2g00986	.	.	.	Ab2g27077	.	.	.	.	.	.	.
Vv01g01001119001	.	.	.	.	.	.	.	.	.	.	.	.	.	.	.	.	.	.	.	.
Vv01g01001120001	Cs7g19400	.	.	.	.	Ab7g25031	.	.	.	.	.	.	.	.	.	.	.	.	.	.
Vv01g01001121001	.	.	.	.	.	.	.	.	.	.	.	.	.	.	.	.	.	.	.	.
Vv01g01001122001	Cs7g19380	.	.	Ci7g229940	.	Ab7g25045	.	.	.	.	.	.	.	.	.	.	.	.	.	.
Vv01g01001123001	Cs7g19320	.	.	Ci7g229890	Cm7g244700	Ab7g24978	.	.	.	.	.	.	.	.	.	.	.	.	.	.
Vv01g01001124001	.	.	.	.	.	.	.	.	.	.	.	.	.	.	.	.	.	.	.	.
Vv01g01001126001	.	.	.	.	.	.	.	.	.	.	.	.	.	.	.	.	.	.	.	.
Vv01g01001127001	.	.	.	.	.	.	.	.	.	.	.	.	.	.	.	.	.	.	.	.
Vv01g01001128001	.	.	.	.	.	.	Vv14g01032942001	Cs2g14940	Cc2g00979	Cx2g009300	.	.	Ab2g27073	.	.	.	.	.	.	.
Vv01g01001129001	.	.	.	.	.	.	.	.	.	.	.	.	.	.	.	.	.	.	.	.
Vv01g01001130001	.	.	.	.	.	.	.	.	.	.	.	.	.	.	.	.	.	.	.	.
Vv01g01001131001	.	.	.	.	.	.	.	.	.	.	.	.	.	.	.	.	.	.	.	.
Vv01g01001132001	.	.	.	.	.	.	.	.	.	.	.	.	.	.	.	.	.	.	.	.
Vv01g01001133001	.	.	.	.	.	.	.	.	.	.	.	.	.	.	.	.	.	.	.	.
Vv01g01001134001	.	.	.	.	.	.	.	.	.	.	.	.	.	.	.	.	.	.	.	.
Vv01g01001135001	.	.	.	.	.	.	.	.	.	.	.	.	.	.	.	.	.	.	.	.
Vv01g01001136001	.	.	.	.	.	.	.	.	.	.	.	.	.	.	.	.	.	.	.	.
Vv01g01001137001	.	.	.	.	.	.	.	.	.	.	.	.	.	.	.	.	.	.	.	.
Vv01g01001138001	.	.	.	.	.	.	.	.	.	.	.	.	.	.	.	.	.	.	.	.
Vv01g01001139001	.	.	.	.	.	.	.	.	.	.	.	.	.	.	.	.	.	.	.	.
Vv01g01001140001	.	.	.	.	.	.	.	.	.	.	.	.	.	.	.	.	.	.	.	.
Vv01g01001142001	.	.	.	.	.	.	.	.	.	.	.	.	.	.	.	.	.	.	.	.
Vv01g01001143001	.	.	.	.	.	.	.	.	.	.	.	.	.	.	.	.	.	.	.	.
Vv01g01001144001	.	Cc9g01232	.	.	.	.	.	.	.	.	.	.	.	.	.	.	.	.	.	.
Vv02g01004790001	.	.	.	.	.	.	.	.	.	.	.	.	.	.	.	.	.	.	.	.
Vv02g01004791001	Cs5g03360	Cc5g00704	Cx5g002490	Ci5g092200	Cm5g051020	Ab5g11051	.	.	.	.	.	.	.	.	.	.	.	.	.	.
Vv02g01004792001	.	Cc5g00706	.	.	.	.	.	.	.	.	.	.	.	.	.	.	.	.	.	.
Vv02g01004793001	.	Cc5g00712	.	.	.	.	.	.	.	.	.	.	.	.	.	.	.	.	.	.
Vv02g01004794001	.	.	.	.	.	.	.	.	.	.	.	.	.	Vv15g01026944001	.	.	.	.	.	.
Vv02g01004795001	.	Cc5g00717	.	.	.	.	.	.	.	.	.	.	.	.	.	.	.	.	.	.
Vv02g01004796001	.	.	.	.	.	.	.	.	.	.	.	.	.	.	.	.	.	.	.	.
Vv02g01004797001	.	Cc5g00724	.	.	.	.	.	.	.	.	.	.	.	.	.	.	.	.	.	.
Vv02g01004798001	.	.	.	.	.	.	.	.	.	.	.	.	.	.	.	.	.	.	.	.
Vv02g01019382001	.	.	.	.	.	.	.	.	.	.	.	.	.	.	.	.	.	.	.	.
Vv02g01019383001	.	.	.	.	.	.	.	.	.	.	.	.	.	.	.	.	.	.	.	.
Vv02g01019385001	Cs5g03350	Cc5g00241	Cx5g002480	Ci5g092210	Cm5g051030	Ab5g10721	.	.	.	.	.	.	.	.	.	.	.	.	.	.
Vv02g01019386001	.	.	.	.	.	.	.	.	.	.	.	.	.	.	.	.	.	.	.	.
Vv02g01019387001	.	.	.	.	.	.	.	.	.	.	.	.	.	Vv15g01026953001	.	.	Cx5g041820	.	.	.
Vv02g01019388001	Cs5g03340	Cc5g00240	Cx5g002470	Ci5g092220	Cm5g051040	Ab5g10800	.	.	.	.	.	.	.	.	.	.	.	.	.	.
Vv02g01019389001	.	.	.	.	.	.	.	.	.	.	.	.	.	.	.	.	.	.	.	.
Vv02g01019390001	Cs5g03330	Cc5g00239	Cx5g002450	Ci5g092230	Cm5g295930	Ab5g11205	.	.	.	.	.	.	.	.	.	.	.	.	.	.
Vv02g01019391001	Cs5g03320	Cc5g00238	Cx5g002440	Ci5g092240	Cm5g051060	Ab5g10702	.	.	.	.	.	.	.	.	.	.	.	.	.	.
Vv02g01019392001	Cs5g03310	Cc5g00237	Cx5g002430	Ci5g092250	Cm5g051070	Ab5g11089	.	.	.	.	.	.	.	.	.	.	.	.	.	.
Vv02g01019393001	Cs5g03300	Cc5g00236	Cx5g002420	Ci5g092260	Cm5g051080	Ab5g11169	.	.	.	.	.	.	.	.	.	.	.	.	.	.
Vv02g01019394001	Cs5g03290	Cc5g00235	Cx5g002410	Ci5g092270	Cm5g051100	Ab5g10931	.	.	.	.	.	.	.	.	.	.	.	.	.	.
Vv02g01019396001	Cs5g03270	Cc5g00233	Cx5g002380	Ci5g092290	Cm5g051120	Ab5g11005	.	.	.	.	.	.	.	.	.	.	.	.	.	.
Vv02g01019397001	.	.	.	.	.	.	Vv16g01028875001	Cs9g19370	Cc9g02119	Cx9g027360	Ci9g055500	Cm9g027810	Ab9g21178	.	.	.	.	.	.	.
Vv02g01019398001	Cs5g03260	Cc5g00232	.	Ci5g092300	Cm5g051130	Ab5g11092	.	.	.	.	.	.	.	.	.	.	.	.	.	.
Vv02g01019399001	Cs5g03250	Cc5g00231	Cx5g002360	Ci5g092310	Cm5g051160	Ab5g11105	.	.	.	.	.	.	.	.	.	.	.	.	.	.
Vv02g01019400001	Cs5g03240	Cc5g00230	Cx5g002350	Ci5g092330	Cm5g051170	Ab5g11062	.	.	.	.	.	.	.	.	.	.	.	.	.	.
Vv02g01019401001	.	.	.	.	.	.	.	.	.	.	.	.	.	.	.	.	.	.	.	.
Vv02g01019402001	.	.	.	.	.	.	.	.	.	.	.	.	.	.	.	.	.	.	.	.
Vv02g01019403001	Cs5g03200	Cc5g00227	Cx5g002300	Ci5g092380	Cm5g051220	Ab5g11311	Vv16g01028864001	Cs9g19270	Cc9g02131	Cx9g027460	Ci9g055610	Cm9g027700	Ab9g21090	.	.	.	.	.	.	.
Vv02g01019404001	Cs5g03180	Cc5g00226	Cx5g002290	Ci5g092390	Cm5g051230	Ab5g10946	.	.	.	.	.	.	.	.	.	.	.	.	.	.
Vv02g01019405001	Cs5g03170	Cc5g00225	Cx5g002280	Ci5g092400	Cm5g052060	Ab5g10705	Vv16g01028860001	Cs9g19250	Cc9g02133	Cx9g027490	Ci9g055630	Cm9g027680	Ab9g21229	.	.	.	.	.	.	.
Vv02g01019406001	.	.	.	.	.	.	.	.	.	.	.	.	.	.	.	.	.	.	.	.
Vv02g01019407001	Cs5g03150	Cc5g00223	Cx5g002260	Ci5g092420	Cm5g051260	Ab5g10787	Vv16g01028856001	Cs9g19220	Cc9g02136	Cx9g027520	Ci9g055660	Cm9g027650	Ab9g21112	.	.	.	.	.	.	.
Vv02g01019408001	.	.	.	.	.	.	.	.	.	.	.	.	.	.	.	.	.	.	.	.
Vv02g01019409001	Cs5g03140	Cc5g00222	Cx5g002240	Ci5g092440	Cm5g051290	Ab5g10992	Vv16g01028854001	Cs9g19210	Cc9g02137	Cx9g027530	Ci9g055670	Cm9g027640	.	.	.	.	.	.	.	.
Vv02g01019410001	.	.	.	.	.	.	.	.	.	.	.	.	.	.	.	.	.	.	.	.
Vv02g01019411001	Cs5g03100	Cc5g00220	Cx5g002220	Ci5g092460	Cm5g051320	Ab5g11038	.	.	.	.	.	.	.	.	.	.	.	.	.	.
Vv02g01019412001	Cs5g03080	Cc5g00219	Cx5g002210	Ci5g092470	Cm5g051330	Ab5g11147	.	.	.	.	.	.	.	.	.	.	.	.	.	.
Vv02g01019413001	Cs5g03070	Cc5g00217	Cx5g002200	Ci5g092490	Cm5g051340	Ab5g11246	Vv16g01028848001	.	.	.	.	.	.	Vv15g01026961001	.	.	Cx5g041540	.	.	.
Vv02g01019414001	Cs5g03060	Cc5g00216	Cx5g002190	.	Cm5g051350	Ab5g10849	.	.	.	.	.	.	.	Vv15g01026962001	.	Cc5g04136	Cx5g041520	.	.	.
Vv02g01019415001	Cs5g03050	Cc5g00215	Cx5g002180	Ci5g092500	Cm5g051360	Ab5g10989	.	.	.	.	.	.	.	.	.	.	.	.	.	.
Vv02g01019416001	Cs5g03040	Cc5g00214	.	Ci5g092510	.	Ab5g10977	.	.	.	.	.	.	.	.	.	.	.	.	.	.
Vv02g01019417001	Cs5g03030	Cc5g00213	Cx5g002170	Ci5g092520	Cm5g051370	Ab5g10864	.	.	.	.	.	.	.	.	.	.	.	.	.	.
Vv02g01019418001	Cs5g03020	Cc5g00212	Cx5g002160	Ci5g092530	Cm5g051380	Ab5g11185	.	.	.	.	.	.	.	.	.	.	.	.	.	.
Vv02g01019419001	Cs5g03010	Cc5g00211	Cx5g002150	Ci5g092540	Cm5g051390	Ab5g11257	Vv16g01028823001	Cs9g19070	Cc9g02150	Cx9g027680	Ci9g055870	Cm9g027460	Ab9g21285	Vv15g01026965001	.	Cc5g04133	Cx5g041490	.	.	.
Vv02g01019420001	Cs5g03000	Cc5g00210	Cx5g002140	Ci5g092550	Cm5g051400	Ab5g10693	.	.	.	.	.	.	.	.	.	.	.	.	.	.
Vv02g01019421001	Cs5g02990	Cc5g00209	Cx5g002130	Ci5g092560	Cm5g051410	Ab5g10804	.	.	.	.	.	.	.	.	.	.	.	.	.	.
Vv02g01019422001	.	.	.	.	.	.	Vv16g01028818001	Cs9g19050	Cc9g02152	Cx9g027700	Ci9g055890	Cm9g027440	Ab9g21194	.	.	.	.	.	.	.
Vv02g01019423001	Cs5g02980	Cc5g00207	Cx5g002110	.	Cm5g051430	Ab5g10788	.	.	.	.	.	.	.	Vv15g01026973001	.	.	.	.	.	.
Vv02g01019425001	Cs5g02970	Cc5g00206	Cx5g002100	Ci5g092580	Cm5g051440	Ab5g10967	.	.	.	.	.	.	.	.	.	.	.	.	.	.
Vv02g01019426001	Cs5g02960	Cc5g00204	Cx5g002090	.	Cm5g051450	Ab5g11055	.	.	.	.	.	.	.	.	.	.	.	.	.	.
Vv02g01019427001	Cs5g02950	Cc5g00203	Cx5g002080	.	Cm5g051460	Ab5g11014	.	.	.	.	.	.	.	.	.	.	.	.	.	.
Vv02g01019429001	Cs5g02940	Cc5g00202	Cx5g002070	.	Cm5g051470	Ab5g10993	.	.	.	.	.	.	.	Vv15g01026993001	Cs9g17940	.	.	Ci4g121280	Cm9g210890	Ab9g19222
Vv02g01019430001	.	.	.	.	.	.	.	.	.	.	.	.	.	.	.	.	.	.	.	.
Vv02g01019432001	Cs5g02910	Cc5g00199	Cx5g002050	Ci5g061130	Cm5g051490	Ab5g10895	.	.	.	.	.	.	.	.	.	.	.	.	.	.
Vv02g01019433001	.	.	Cx5g002040	.	.	.	.	.	.	.	.	.	.	.	.	.	.	.	.	.
Vv02g01019434001	Cs5g02900	Cc5g00198	Cx5g002030	Ci5g061140	Cm5g051500	Ab5g10963	.	.	.	.	.	.	.	.	.	.	.	.	.	.
Vv02g01019435001	.	.	.	.	.	.	.	.	.	.	.	.	.	.	.	.	.	.	.	.
Vv02g01019436001	.	.	.	.	.	.	.	.	.	.	.	.	.	.	.	.	.	.	.	.
Vv02g01019439001	Cs5g02890	Cc5g00197	Cx5g002020	Ci5g061150	Cm5g051510	Ab5g10691	.	.	.	.	.	.	.	.	.	.	.	.	.	.
Vv02g01019440001	Cs5g02880	Cc5g00196	Cx5g002010	Ci5g061160	Cm5g051520	Ab5g10780	Vv16g01028796001	.	.	.	.	.	.	Vv15g01027008001	.	Cc5g04124	Cx5g041390	.	.	.
Vv02g01019441001	.	.	.	.	.	.	.	.	.	.	.	.	.	.	.	.	.	.	.	.
Vv02g01019442001	.	.	.	.	.	.	.	.	.	.	.	.	.	.	.	.	.	.	.	.
Vv02g01019443001	.	.	.	.	.	.	.	.	.	.	.	.	.	.	.	.	.	.	.	.
Vv02g01019444001	Cs5g02860	Cc5g00194	Cx5g001990	Ci5g061190	Cm5g051540	Ab5g10880	Vv16g01028788001	Cs9g18920	Cc9g02161	Cx9g027810	Ci9g055950	Cm9g027400	Ab9g21079	.	.	.	.	.	.	.
Vv02g01019445001	Cs5g02850	Cc5g00193	Cx5g001980	Ci5g061200	Cm5g051550	Ab5g11045	.	.	.	.	.	.	.	.	.	.	.	.	.	.
Vv02g01019446001	.	.	.	.	.	.	.	.	.	.	.	.	.	.	.	.	.	.	.	.
Vv02g01019447001	Cs5g02830	Cc5g00191	Cx5g001960	Ci5g061220	Cm5g051570	Ab5g10778	.	.	.	.	.	.	.	.	.	.	.	.	.	.
Vv02g01019448001	Cs5g02820	Cc5g00190	Cx5g001950	Ci5g061230	Cm5g051580	Ab5g10956	Vv16g01028755001	.	.	.	.	.	.	.	.	.	.	.	.	.
Vv02g01019449001	Cs5g02810	Cc5g00189	.	.	.	Ab5g11074	.	.	.	.	.	.	.	.	.	.	.	.	.	.
Vv02g01019450001	Cs5g02800	Cc5g00188	Cx5g001920	Ci5g061250	Cm5g051590	Ab5g11120	.	.	.	.	.	.	.	.	.	.	.	.	.	.
Vv02g01019452001	.	.	.	.	.	.	.	.	.	.	.	.	.	.	.	.	.	.	.	.
Vv02g01019453001	.	.	.	.	.	.	.	.	.	.	.	.	.	.	.	.	.	.	.	.
Vv02g01019454001	.	.	.	.	.	.	.	.	.	.	.	.	.	.	.	.	.	.	.	.
Vv02g01019456001	Cs5g02770	.	.	Ci5g061290	Cm5g051630	Ab5g10874	.	.	.	.	.	.	.	.	.	.	.	.	.	.
Vv02g01019457001	Cs5g02760	Cc5g00184	Cx5g001880	Ci5g061300	Cm5g051620	Ab5g10950	.	.	.	.	.	.	.	.	.	.	.	.	.	.
Vv02g01019458001	.	Cc5g00183	Cx5g001870	.	.	.	.	.	.	.	.	.	.	.	.	.	.	.	.	.
Vv02g01019459001	.	.	.	.	.	.	.	.	.	.	.	.	.	.	.	.	.	.	.	.
Vv02g01019461001	.	.	.	.	.	.	.	.	.	.	.	.	.	Vv15g01027030001	.	Cc5g04109	Cx5g041220	.	.	.
Vv02g01019462001	Cs5g02740	Cc5g00181	Cx5g001850	Ci5g061320	Cm5g051650	Ab5g11209	.	.	.	.	.	.	.	Vv15g01027031001	.	Cc5g04108	Cx5g041210	.	.	.
Vv02g01019463001	.	.	.	.	.	.	.	.	.	.	.	.	.	.	.	.	.	.	.	.
Vv02g01019464001	.	.	.	.	.	.	.	.	.	.	.	.	.	.	.	.	.	.	.	.
Vv02g01019465001	Cs5g02730	Cc5g00180	Cx5g001840	Ci5g061330	Cm5g051670	Ab5g10695	.	.	.	.	.	.	.	Vv15g01027032001	.	Cc5g04107	Cx5g041200	.	.	.
Vv02g01019467001	.	.	.	.	.	.	.	.	.	.	.	.	.	.	.	.	.	.	.	.
Vv02g01019468001	.	.	.	.	.	.	.	.	.	.	.	.	.	.	.	.	.	.	.	.
Vv02g01019469001	.	.	.	.	.	.	.	.	.	.	.	.	.	.	.	.	.	.	.	.
Vv02g01019470001	.	.	.	.	.	.	.	.	.	.	.	.	.	.	.	.	.	.	.	.
Vv02g01019471001	.	.	.	.	.	.	.	.	.	.	.	.	.	.	.	.	.	.	.	.
Vv02g01019472001	Cs5g02680	.	Cx5g001800	Ci5g061370	Cm5g051700	Ab5g11177	.	.	.	.	.	.	.	.	.	.	.	.	.	.
Vv02g01019473001	.	.	.	.	.	.	.	.	.	.	.	.	.	.	.	.	.	.	.	.
Vv02g01019474001	.	.	.	.	.	.	.	.	.	.	.	.	.	.	.	.	.	.	.	.
Vv02g01019475001	.	.	.	.	.	.	.	.	.	.	.	.	.	.	.	.	.	.	.	.
Vv02g01019476001	.	.	.	.	.	.	.	.	.	.	.	.	.	.	.	.	.	.	.	.
Vv02g01019478001	.	Cc5g00175	Cx5g001790	.	.	.	.	.	.	.	.	.	.	.	.	.	.	.	.	.
Vv02g01019479001	Cs5g02670	Cc5g00174	Cx5g001780	Ci5g061380	Cm5g051710	Ab5g10809	Vv16g01028724001	.	.	.	.	.	.	.	.	.	.	.	.	.
Vv02g01019481001	.	.	.	.	.	.	.	.	.	.	.	.	.	Vv15g01027040001	.	Cc5g04102	Cx5g041150	.	.	.
Vv02g01019482001	Cs5g02660	Cc5g00173	Cx5g001770	Ci5g061390	Cm5g051720	.	.	.	.	.	.	.	.	Vv15g01027042001	.	Cc5g04101	Cx5g041140	.	.	.
Vv02g01019483001	.	.	.	.	.	.	.	.	.	.	.	.	.	.	.	.	.	.	.	.
Vv02g01019484001	Cs5g02640	Cc5g00171	Cx5g001750	Ci5g061400	Cm5g051740	Ab5g11244	.	.	.	.	.	.	.	.	.	.	.	.	.	.
Vv02g01019486001	.	.	.	.	.	.	.	.	.	.	.	.	.	.	.	.	.	.	.	.
Vv02g01019488001	.	.	.	.	.	.	.	.	.	.	.	.	.	.	.	.	.	.	.	.
Vv02g01019489001	.	.	.	.	.	.	.	.	.	.	.	.	.	.	.	.	.	.	.	.
Vv02g01019490001	.	Cc5g00167	Cx5g001710	.	.	.	.	.	.	.	.	.	.	.	.	.	.	.	.	.
Vv02g01019491001	Cs5g02590	Cc5g00165	Cx5g001690	Ci5g061470	Cm5g051800	Ab5g11282	.	.	.	.	.	.	.	Vv15g01027053001	.	Cc5g04093	Cx5g041060	.	.	.
Vv02g01019492001	Cs5g02580	Cc5g00164	Cx5g001680	Ci5g061480	Cm5g051810	Ab5g11160	.	.	.	.	.	.	.	Vv15g01027054001	.	.	.	.	.	.
Vv02g01019494001	.	.	.	.	.	.	.	.	.	.	.	.	.	.	.	.	.	.	.	.
Vv02g01019497001	Cs5g02560	Cc5g00162	Cx5g001660	Ci5g061510	Cm5g051830	Ab5g10966	.	.	.	.	.	.	.	.	.	.	.	.	.	.
Vv02g01019499001	Cs5g02550	Cc5g00161	Cx5g001650	Ci5g061520	Cm5g051840	Ab5g10791	.	.	.	.	.	.	.	.	.	.	.	.	.	.
Vv02g01019500001	Cs5g02530	Cc5g00159	Cx5g001630	Ci5g061550	Cm5g051880	Ab5g10748	.	.	.	.	.	.	.	Vv15g01027056001	.	Cc5g04091	Cx5g041040	.	.	.
Vv02g01019501001	Cs5g02520	Cc5g00158	Cx5g001620	Ci5g061560	Cm5g051890	.	.	.	.	.	.	.	.	Vv15g01027058001	.	Cc5g04089	Cx5g041000	.	.	.
Vv02g01019502001	Cs5g02500	Cc5g00157	Cx5g001610	Ci5g061570	Cm5g051900	Ab5g11118	.	.	.	.	.	.	.	.	.	.	.	.	.	.
Vv02g01019503001	.	.	.	.	.	.	.	.	.	.	.	.	.	.	.	.	.	.	.	.
Vv02g01019504001	Cs5g02490	Cc5g00156	Cx5g001600	Ci5g061580	Cm5g051910	Ab5g11196	.	.	.	.	.	.	.	.	.	.	.	.	.	.
Vv02g01019506001	Cs5g02480	Cc5g00155	Cx5g001590	Ci5g061590	Cm5g051920	Ab5g10976	.	.	.	.	.	.	.	.	.	.	.	.	.	.
Vv02g01019508001	.	.	.	.	.	.	.	.	.	.	.	.	.	.	.	.	.	.	.	.
Vv02g01019509001	Cs5g02460	Cc5g00153	Cx5g001560	Ci5g061610	Cm5g051950	Ab5g10675	.	.	.	.	.	.	.	.	.	.	.	.	.	.
Vv02g01019510001	Cs5g02450	Cc5g00152	Cx5g001550	Ci5g061620	Cm5g051970	Ab5g10764	.	.	.	.	.	.	.	.	.	.	.	.	.	.
Vv02g01019511001	Cs5g02440	Cc5g00151	Cx5g001540	Ci5g061630	.	Ab5g11237	Vv16g01028718001	Cs9g18480	Cc9g02198	Cx9g028250	Ci9g056350	Cm9g027010	Ab9g19212	Vv15g01027069001	.	Cc5g04085	Cx5g040920	.	.	.
Vv02g01019512001	Cs5g02410	Cc5g00148	Cx5g001510	Ci5g061660	Cm5g052000	Ab5g10832	.	.	.	.	.	.	.	.	.	.	.	.	.	.
Vv02g01019513001	Cs5g02400	Cc5g00147	Cx5g001490	Ci5g061680	Cm5g052020	Ab5g10981	.	.	.	.	.	.	.	.	.	.	.	.	.	.
Vv02g01019514001	Cs5g02390	Cc5g00146	Cx5g001480	Ci5g061690	Cm5g052050	Ab5g10751	.	.	.	.	.	.	.	.	.	.	.	.	.	.
Vv02g01019515001	.	.	.	.	.	.	.	.	.	.	.	.	.	.	.	.	.	.	.	.
Vv02g01019516001	Cs5g02370	Cc5g00145	Cx5g001470	.	Cm5g051240	Ab5g10855	.	.	.	.	.	.	.	.	.	.	.	.	.	.
Vv02g01019517001	Cs5g02360	Cc5g00144	Cx5g001450	Ci5g061720	Cm5g052080	Ab5g10819	Vv16g01028704001	.	.	.	.	.	.	Vv15g01027078001	.	Cc5g04079	Cx5g040850	.	.	.
Vv02g01019518001	Cs5g02350	Cc5g00143	Cx5g001430	Ci5g061740	Cm5g052090	Ab5g10745	.	.	.	.	.	.	.	.	.	.	.	.	.	.
Vv02g01019519001	Cs5g02340	Cc5g00142	Cx5g001420	Ci5g061750	Cm5g052100	Ab5g11267	.	.	.	.	.	.	.	.	.	.	.	.	.	.
Vv02g01019521001	Cs5g02330	Cc5g00141	Cx5g001410	Ci5g061760	Cm5g052110	Ab5g10893	.	.	.	.	.	.	.	.	.	.	.	.	.	.
Vv02g01019523001	Cs5g02320	Cc5g00140	Cx5g001400	Ci5g061780	Cm5g052120	Ab5g10935	.	.	.	.	.	.	.	.	.	.	.	.	.	.
Vv02g01019525001	Cs5g02310	Cc5g00139	Cx5g001390	Ci5g061800	Cm5g052130	Ab5g11087	.	.	.	.	.	.	.	.	.	.	.	.	.	.
Vv02g01019526001	Cs5g02300	Cc5g00138	Cx5g001380	Ci5g061810	Cm5g052140	Ab5g11175	.	.	.	.	.	.	.	.	.	.	.	.	.	.
Vv02g01019527001	Cs5g02290	Cc5g00137	Cx5g001370	Ci5g061820	Cm5g052150	Ab5g11248	.	.	.	.	.	.	.	.	.	.	.	.	.	.
Vv02g01019529001	Cs5g02280	Cc5g00136	Cx5g001360	Ci5g061840	.	Ab5g10684	.	.	.	.	.	.	.	.	.	.	.	.	.	.
Vv02g01019530001	Cs5g02260	Cc5g00134	Cx5g001320	Ci5g061880	Cm5g052180	Ab5g10793	Vv16g01038717001	Cs9g18010	Cc9g02240	Cx9g028630	.	.	.	Vv15g01027094001	.	Cc5g04067	Cx5g040770	.	.	.
Vv02g01019532001	Cs5g02240	Cc5g00130	Cx5g001300	Ci5g061900	Cm5g052200	Ab5g10883	.	.	.	.	.	.	.	.	.	.	.	.	.	.
Vv02g01019533001	.	.	.	.	.	.	.	.	.	.	.	.	.	.	.	.	.	.	.	.
Vv02g01019535001	.	.	.	.	.	.	.	.	.	.	.	.	.	.	.	.	.	.	.	.
Vv02g01019536001	Cs5g02200	Cc5g00126	Cx5g001280	Ci5g061930	Cm5g052220	Ab5g11290	.	.	.	.	.	.	.	.	.	.	.	.	.	.
Vv02g01019537001	Cs5g02190	Cc5g00125	Cx5g001270	Ci5g061940	Cm5g052230	Ab5g10796	Vv16g01038709001	Cs9g17950	Cc9g02246	Cx9g028690	Ci4g121290	Cm9g210900	.	.	.	.	.	.	.	.
Vv02g01019538001	.	.	.	.	.	.	.	.	.	.	.	.	.	.	.	.	.	.	.	.
Vv02g01019539001	Cs5g02180	Cc5g00124	Cx5g001260	Ci5g248780	Cm5g052240	Ab5g10688	.	.	.	.	.	.	.	.	.	.	.	.	.	.
Vv02g01019540001	Cs5g02170	.	Cx5g001250	Ci5g061960	Cm5g052250	Ab5g10941	.	.	.	.	.	.	.	.	.	.	.	.	.	.
Vv02g01019542001	Cs5g02160	Cc5g00122	Cx5g001240	.	Cm5g052260	Ab5g10901	.	.	.	.	.	.	.	.	.	.	.	.	.	.
Vv02g01019543001	.	.	.	.	.	.	.	.	.	.	.	.	.	Vv15g01027122001	.	Cc5g04061	Cx5g040710	.	.	.
Vv02g01019544001	.	.	.	.	.	.	.	.	.	.	.	.	.	.	.	.	.	.	.	.
Vv02g01019545001	Cs5g02150	Cc5g00121	Cx5g001210	Ci5g061980	.	Ab5g11021	.	.	.	.	.	.	.	.	.	.	.	.	.	.
Vv02g01019546001	Cs5g02140	Cc5g00120	Cx5g001200	Ci5g061990	.	Ab5g10915	.	.	.	.	.	.	.	Vv15g01027147001	.	Cc5g04058	Cx5g040680	.	.	.
Vv02g01019547001	.	.	.	.	.	.	.	.	.	.	.	.	.	.	.	.	.	.	.	.
Vv02g01019548001	Cs5g02120	Cc5g00119	Cx5g001190	.	.	Ab5g11027	Vv16g01038547001	.	Cc5g01318	Cx5g018180	.	.	.	.	.	.	.	.	.	.
Vv02g01019552001	Cs5g02110	Cc5g00117	Cx5g001170	Ci5g062020	.	Ab5g11142	Vv16g01038547001	.	Cc5g01318	Cx5g018180	.	.	.	Vv15g01027150001	.	.	Cx5g018180	.	.	.
Vv02g01019553001	.	.	.	.	.	.	.	.	.	.	.	.	.	.	.	.	.	.	.	.
Vv02g01019554001	Cs5g02090	Cc5g00115	Cx5g001150	Ci5g062040	.	Ab5g11176	Vv16g01038549001	.	Cc5g01320	Cx5g018200	.	.	.	.	.	.	.	.	.	.
Vv02g01019555001	Cs5g02080	Cc5g00114	Cx5g001140	Ci5g062050	.	Ab5g11273	.	.	.	.	.	.	.	.	.	.	.	.	.	.
Vv02g01019556001	Cs5g02070	Cc5g00113	.	Ci5g062060	.	Ab5g10729	.	.	.	.	.	.	.	.	.	.	.	.	.	.
Vv02g01019557001	.	.	.	.	.	.	Vv16g01038551001	.	.	.	.	.	.	Vv15g01027153001	.	.	Cx5g018230	.	.	.
Vv02g01019558001	Cs5g02050	Cc5g00111	Cx5g001130	.	.	Ab5g11214	.	.	.	.	.	.	.	.	.	.	.	.	.	.
Vv02g01019559001	Cs5g02040	Cc5g00109	Cx5g001120	Ci5g062080	.	Ab5g10798	.	.	.	.	.	.	.	.	.	.	.	.	.	.
Vv02g01019560001	Cs5g02030	Cc5g00108	Cx5g001110	Ci5g062100	.	Ab5g11076	.	.	.	.	.	.	.	.	.	.	.	.	.	.
Vv02g01019561001	.	Cc5g00107	.	.	.	.	.	.	.	.	.	.	.	.	.	.	.	.	.	.
Vv02g01019562001	Cs5g02010	Cc5g00105	Cx5g001090	Ci5g062120	.	Ab5g10887	.	.	.	.	.	.	.	.	.	.	.	.	.	.
Vv02g01019563001	Cs5g02000	Cc5g00104	Cx5g001080	Ci5g062140	.	Ab5g12009	.	.	.	.	.	.	.	.	.	.	.	.	.	.
Vv02g01019565001	Cs5g01990	Cc5g00103	Cx5g001060	Ci5g062170	.	Ab5g10964	.	.	.	.	.	.	.	.	.	.	.	.	.	.
Vv02g01019566001	Cs5g01980	Cc5g00102	Cx5g001050	Ci5g062180	.	Ab5g10866	.	.	.	.	.	.	.	.	.	.	.	.	.	.
Vv02g01019568001	.	.	.	.	.	.	.	.	.	.	.	.	.	.	.	.	.	.	.	.
Vv02g01019569001	.	.	.	.	.	.	.	.	.	.	.	.	.	.	.	.	.	.	.	.
Vv02g01019570001	.	.	.	.	.	.	.	.	.	.	.	.	.	.	.	.	.	.	.	.
Vv02g01019572001	.	.	.	.	.	.	.	.	.	.	.	.	.	.	.	.	.	.	.	.
Vv02g01019573001	.	.	.	.	.	.	.	.	.	.	.	.	.	.	.	.	.	.	.	.
Vv02g01019574001	.	.	.	.	.	.	.	.	.	.	.	.	.	.	.	.	.	.	.	.
Vv02g01019575001	.	.	.	.	.	.	.	.	.	.	.	.	.	.	.	.	.	.	.	.
Vv02g01019576001	.	.	.	.	.	.	.	.	.	.	.	.	.	.	.	.	.	.	.	.
Vv02g01019579001	.	.	.	.	.	.	.	.	.	.	.	.	.	.	.	.	.	.	.	.
Vv02g01019580001	.	.	.	.	.	.	.	.	.	.	.	.	.	.	.	.	.	.	.	.
Vv02g01019581001	.	.	.	.	.	.	.	.	.	.	.	.	.	.	.	.	.	.	.	.
Vv02g01019582001	.	.	.	.	.	.	.	.	.	.	.	.	.	.	.	.	.	.	.	.
Vv02g01019583001	.	.	.	.	.	.	.	.	.	.	.	.	.	.	.	.	.	.	.	.
Vv02g01019584001	.	.	.	.	.	.	.	.	.	.	.	.	.	.	.	.	.	.	.	.
Vv02g01019585001	Cs5g01950	Cc5g00099	Cx5g001020	Ci5g062210	.	Ab5g11109	.	.	.	.	.	.	.	.	.	.	.	.	.	.
Vv02g01019586001	.	.	.	.	.	.	.	.	.	.	.	.	.	.	.	.	.	.	.	.
Vv02g01019587001	.	.	.	.	.	.	.	.	.	.	.	.	.	.	.	.	.	.	.	.
Vv02g01019588001	.	.	.	.	.	.	.	.	.	.	.	.	.	.	.	.	.	.	.	.
Vv02g01019589001	.	.	.	.	.	.	.	.	.	.	.	.	.	.	.	.	.	.	.	.
Vv02g01019590001	.	.	.	.	.	.	.	.	.	.	.	.	.	.	.	.	.	.	.	.
Vv02g01019591001	.	.	.	.	.	.	.	.	.	.	.	.	.	.	.	.	.	.	.	.
Vv02g01019592001	.	.	.	.	.	.	.	.	.	.	.	.	.	.	.	.	.	.	.	.
Vv02g01019593001	.	Cc5g00098	Cx5g001010	.	.	.	.	.	.	.	.	.	.	.	.	.	.	.	.	.
Vv02g01019594001	Cs5g01930	Cc5g00097	Cx5g001000	Ci5g062230	.	Ab5g11300	.	.	.	.	.	.	.	.	.	.	.	.	.	.
Vv02g01019595001	Cs5g01920	Cc5g00096	Cx5g000990	Ci5g062240	.	Ab5g11186	Vv16g01038564001	.	Cc5g01348	.	.	.	.	.	.	.	.	.	.	.
Vv02g01019596001	.	.	.	.	.	.	.	.	.	.	.	.	.	.	.	.	.	.	.	.
Vv02g01019597001	Cs5g01910	Cc5g00094	Cx5g000980	Ci5g062250	.	Ab5g11206	.	.	.	.	.	.	.	.	.	.	.	.	.	.
Vv02g01019599001	Cs5g01890	Cc5g00091	Cx5g000960	Ci5g062270	.	Ab5g10784	.	.	.	.	.	.	.	.	.	.	.	.	.	.
Vv02g01019600001	.	.	.	.	.	.	.	.	.	.	.	.	.	.	.	.	.	.	.	.
Vv02g01019601001	Cs5g01880	Cc5g00428	Cx5g000950	Ci5g062280	.	Ab5g10863	.	.	.	.	.	.	.	.	.	.	.	.	.	.
Vv02g01019602001	Cs5g01870	Cc5g00438	Cx5g000940	.	.	Ab5g10900	.	.	.	.	.	.	.	Vv15g01027175001	.	Cc5g04040	Cx5g040520	.	.	.
Vv02g01019603001	.	.	.	.	.	.	.	.	.	.	.	.	.	.	.	.	.	.	.	.
Vv02g01019604001	.	.	.	.	.	.	.	.	.	.	.	.	.	.	.	.	.	.	.	.
Vv02g01019605001	Cs5g01860	Cc5g00088	Cx5g000930	Ci5g062300	.	Ab5g11272	.	.	.	.	.	.	.	.	.	.	.	.	.	.
Vv02g01019606001	.	.	.	.	.	.	.	.	.	.	.	.	.	.	.	.	.	.	.	.
Vv02g01019607001	Cs5g01840	Cc5g00086	Cx5g000910	Ci5g062320	.	Ab5g11221	Vv16g01038580001	.	.	.	.	.	.	.	.	.	.	.	.	.
Vv02g01019608001	Cs5g01830	Cc5g00085	Cx5g000900	Ci5g062330	.	Ab5g10807	.	.	.	.	.	.	.	.	.	.	.	.	.	.
Vv02g01019609001	Cs5g01810	Cc5g00083	Cx5g000870	Ci5g127790	.	Ab5g10906	.	.	.	.	.	.	.	.	.	.	.	.	.	.
Vv02g01019610001	Cs5g01780	Cc5g00080	Cx5g000840	.	.	Ab5g11308	.	.	.	.	.	.	.	.	.	.	.	.	.	.
Vv02g01019611001	.	.	.	.	.	.	.	.	.	.	.	.	.	.	.	.	.	.	.	.
Vv02g01019612001	Cs5g01770	Cc5g00078	Cx5g000820	Ci5g124980	.	Ab5g11223	.	.	.	.	.	.	.	.	.	.	.	.	.	.
Vv02g01019613001	Cs5g01760	Cc5g00077	Cx5g000810	.	.	Ab5g10742	.	.	.	.	.	.	.	.	.	.	.	.	.	.
Vv02g01019614001	.	.	.	.	.	.	.	.	.	.	.	.	.	.	.	.	.	.	.	.
Vv02g01019615001	.	.	.	.	.	.	.	.	.	.	.	.	.	.	.	.	.	.	.	.
Vv02g01019616001	.	.	.	.	.	.	.	.	.	.	.	.	.	.	.	.	.	.	.	.
Vv02g01019618001	Cs5g01750	Cc5g00076	Cx5g000800	Ci5g127840	.	Ab5g10996	Vv16g01038588001	.	Cc5g01370	.	.	.	.	Vv15g01027183001	.	.	.	.	.	.
Vv02g01019619001	Cs5g01740	Cc5g00449	Cx5g000770	Ci5g127850	.	Ab5g11669	Vv16g01038591001	.	Cc5g01375	.	.	.	.	Vv15g01027184001	.	Cc5g04033	Cx5g040460	.	.	.
Vv02g01019621001	Cs5g01730	Cc5g00074	Cx5g000760	Ci5g127860	.	Ab5g11299	.	.	.	.	.	.	.	Vv15g01027185001	.	Cc5g04032	Cx5g040450	.	.	.
Vv02g01019622001	Cs5g01720	Cc5g00073	Cx5g000750	Ci5g127870	.	Ab5g10840	.	.	.	.	.	.	.	.	.	.	.	.	.	.
Vv02g01019623001	.	.	.	.	.	.	.	.	.	.	.	.	.	.	.	.	.	.	.	.
Vv02g01019624001	.	.	.	.	.	.	.	.	.	.	.	.	.	.	.	.	.	.	.	.
Vv02g01019625001	.	.	.	.	.	.	.	.	.	.	.	.	.	.	.	.	.	.	.	.
Vv02g01019626001	Cs5g01710	Cc5g00072	Cx5g000740	Ci5g127880	.	Ab5g11132	.	.	.	.	.	.	.	.	.	.	.	.	.	.
Vv02g01019627001	Cs5g01700	Cc5g00071	Cx5g000730	Ci5g127890	Cm5g293450	Ab5g11015	.	.	.	.	.	.	.	Vv15g01027186001	.	Cc5g04031	Cx5g040440	.	.	.
Vv02g01019628001	.	.	.	.	.	.	.	.	.	.	.	.	.	.	.	.	.	.	.	.
Vv02g01019629001	Cs5g01690	Cc5g00480	Cx5g000720	Ci5g127900	.	Ab5g11304	.	.	.	.	.	.	.	.	.	.	.	.	.	.
Vv02g01019630001	.	.	.	.	.	.	.	.	.	.	.	.	.	.	.	.	.	.	.	.
Vv02g01019631001	Cs5g01670	Cc5g00067	Cx5g000700	Ci5g127920	Cm5g295930	Ab5g11654	Vv16g01038594001	.	Cc5g01381	.	.	.	.	Vv15g01027191001	.	Cc5g04026	.	.	.	.
Vv02g01019632001	.	.	.	.	.	.	.	.	.	.	.	.	.	.	.	.	.	.	.	.
Vv02g01019633001	Cs5g01660	Cc5g00066	Cx5g000690	Ci5g127950	.	Ab5g11661	Vv16g01038599001	.	Cc5g01384	.	.	.	.	.	.	.	.	.	.	.
Vv02g01019635001	Cs5g01650	Cc5g00065	Cx5g000680	Ci5g127980	.	Ab5g11121	.	.	.	.	.	.	.	.	.	.	.	.	.	.
Vv02g01019636001	Cs5g01640	Cc5g00064	Cx5g000670	Ci5g127990	.	Ab5g11044	.	.	.	.	.	.	.	.	.	.	.	.	.	.
Vv02g01019637001	Cs5g01630	Cc5g00063	Cx5g000660	Ci5g128000	.	Ab5g10955	Vv16g01038605001	.	Cc5g01387	.	.	.	.	.	.	.	.	.	.	.
Vv02g01019639001	Cs5g01610	Cc5g00061	Cx5g000640	Ci5g128020	.	Ab5g10752	.	.	.	.	.	.	.	.	.	.	.	.	.	.
Vv02g01019640001	Cs5g01600	Cc5g00060	Cx5g000630	Ci5g128030	.	Ab5g10833	.	.	.	.	.	.	.	.	.	.	.	.	.	.
Vv02g01019641001	.	.	.	.	.	.	.	.	.	.	.	.	.	.	.	.	.	.	.	.
Vv02g01019642001	Cs5g01590	Cc5g00059	Cx5g000620	Ci5g128040	.	Ab5g11229	.	.	.	.	.	.	.	.	.	.	.	.	.	.
Vv02g01019643001	.	.	.	.	.	.	.	.	.	.	.	.	.	.	.	.	.	.	.	.
Vv02g01019645001	Cs5g01560	Cc5g00056	Cx5g000590	Ci5g128080	.	Ab5g11277	Vv16g01038611001	.	Cc5g01394	.	.	.	.	.	.	.	.	.	.	.
Vv02g01019646001	.	.	.	.	.	.	.	.	.	.	.	.	.	.	.	.	.	.	.	.
Vv02g01019647001	Cs5g01550	Cc5g00055	Cx5g000580	Ci5g128090	.	Ab5g10835	.	.	.	.	.	.	.	.	.	.	.	.	.	.
Vv02g01019648001	Cs5g01540	Cc5g00054	Cx5g000570	Ci5g128100	.	Ab5g11251	Vv16g01038614001	.	Cc5g01399	.	.	.	.	.	.	.	.	.	.	.
Vv02g01019649001	.	.	.	.	.	.	.	.	.	.	.	.	.	.	.	.	.	.	.	.
Vv02g01019650001	Cs5g01530	Cc5g00053	Cx5g000560	Ci5g128120	Cm5g124990	Ab5g10692	.	.	.	.	.	.	.	.	.	.	.	.	.	.
Vv02g01019651001	Cs5g01520	Cc5g00052	Cx5g000550	Ci5g128130	.	Ab5g10924	.	.	.	.	.	.	.	.	.	.	.	.	.	.
Vv02g01019653001	.	.	.	.	.	.	.	.	.	.	.	.	.	.	.	.	.	.	.	.
Vv02g01019654001	Cs5g01490	Cc5g00049	Cx5g000510	Ci5g128160	.	.	.	.	.	.	.	.	.	.	.	.	.	.	.	.
Vv02g01019655001	Cs5g01480	Cc5g00048	Cx5g000500	Ci5g128170	.	Ab5g11073	Vv16g01038619001	.	Cc5g01406	Cx5g018510	.	.	.	Vv15g01027407001	.	Cc5g04010	Cx5g018510	.	.	.
Vv02g01019657001	Cs5g01460	Cc5g00047	Cx5g000460	Ci5g124320	.	Ab5g25415	.	.	.	.	.	.	.	.	.	.	.	.	.	.
Vv02g01019659001	Cs5g01450	Cc5g00046	Cx5g000450	Ci5g128230	.	Ab5g25411	.	.	.	.	.	.	.	Vv15g01027412001	.	Cc5g04005	Cx5g040200	.	.	.
Vv02g01019660001	Cs5g01440	Cc5g00045	Cx5g000440	Ci5g128240	.	Ab5g25414	.	.	.	.	.	.	.	.	.	.	.	.	.	.
Vv02g01019662001	.	.	.	.	.	.	.	.	.	.	.	.	.	.	.	.	.	.	.	.
Vv02g01019663001	Cs5g03980	Cc5g00302	Cx5g000410	Ci5g091530	.	Ab5g10982	.	.	.	.	.	.	.	.	.	.	.	.	.	.
Vv02g01019664001	Cs5g01400	Cc5g00043	Cx5g000400	Ci5g128260	.	Ab5g25412	.	.	.	.	.	.	.	.	.	.	.	.	.	.
Vv02g01019665001	Cs5g01390	Cc5g00042	Cx5g000390	Ci5g128270	.	Ab5g25416	.	.	.	.	.	.	.	.	.	.	.	.	.	.
Vv02g01019666001	.	Cc5g00041	Cx5g000380	.	.	.	.	.	.	.	.	.	.	.	.	.	.	.	.	.
Vv02g01019667001	Cs5g01380	Cc5g00040	Cx5g000370	Ci5g128290	.	.	Vv16g01038629001	.	Cc5g01415	Cx5g019440	.	.	.	.	.	.	.	.	.	.
Vv02g01019668001	Cs5g01370	Cc5g00039	Cx5g000360	Ci5g128300	.	.	Vv16g01038630001	.	.	.	.	.	.	Vv15g01027429001	.	Cc5g03995	Cx5g040080	.	.	.
Vv02g01019669001	Cs5g01360	Cc5g00038	Cx5g000350	Ci5g128310	Cm5g124490	.	.	.	.	.	.	.	.	.	.	.	.	.	.	.
Vv02g01019670001	.	.	.	.	.	.	.	.	.	.	.	.	.	.	.	.	.	.	.	.
Vv02g01019671001	.	Cc5g00035	Cx5g000320	.	.	.	.	.	.	.	.	.	.	Vv15g01027432001	.	Cc5g03993	.	.	.	.
Vv02g01019673001	.	.	.	.	.	.	Vv16g01028893001	Cs9g17730	Cc9g02098	Cx9g027190	Ci9g055290	Cm9g027970	.	.	.	.	.	.	.	.
Vv02g01019674001	Cs5g01320	Cc5g00033	Cx5g000310	Ci5g128340	.	.	Vv16g01038633001	.	Cc5g01420	Cx5g019480	.	.	.	.	.	.	.	.	.	.
Vv02g01019675001	Cs5g01310	Cc5g00032	Cx5g000300	Ci5g128350	.	.	.	.	.	.	.	.	.	.	.	.	.	.	.	.
Vv02g01019677001	Cs5g01300	Cc5g00031	Cx5g000290	Ci5g128360	.	.	.	.	.	.	.	.	.	.	.	.	.	.	.	.
Vv02g01019678001	Cs5g01290	Cc5g00030	Cx5g000280	.	.	.	.	.	.	.	.	.	.	.	.	.	.	.	.	.
Vv02g01019679001	.	.	.	.	.	.	Vv16g01038637001	.	Cc5g01424	Cx5g019590	.	.	.	Vv15g01027436001	.	.	.	.	.	.
Vv02g01019680001	Cs5g01280	Cc5g00029	Cx5g000270	Ci5g128380	.	.	.	.	.	.	.	.	.	Vv15g01027437001	.	Cc5g03989	Cx5g040020	.	.	.
Vv02g01019681001	.	.	.	.	.	.	.	.	.	.	.	.	.	.	.	.	.	.	.	.
Vv02g01019682001	.	.	.	.	.	.	.	.	.	.	.	.	.	.	.	.	.	.	.	.
Vv02g01019683001	.	.	.	.	.	.	.	.	.	.	.	.	.	.	.	.	.	.	.	.
Vv02g01019684001	Cs5g01260	Cc5g00026	Cx5g000250	Ci5g128410	.	.	.	.	.	.	.	.	.	.	.	.	.	.	.	.
Vv02g01019685001	Cs5g01250	Cc5g00025	Cx5g000240	Ci5g128420	.	.	.	.	.	.	.	.	.	.	.	.	.	.	.	.
Vv02g01019686001	.	.	.	.	.	.	.	.	.	.	.	.	.	.	.	.	.	.	.	.
Vv02g01019687001	.	.	.	.	.	.	.	.	.	.	.	.	.	.	.	.	.	.	.	.
Vv02g01019689001	Cs5g01230	Cc5g00023	.	.	.	.	.	.	.	.	.	.	.	.	.	.	.	.	.	.
Vv02g01019690001	Cs5g01220	Cc5g00022	Cx5g000210	Ci5g128440	.	.	.	.	.	.	.	.	.	.	.	.	.	.	.	.
Vv02g01019691001	.	.	.	.	.	.	.	.	.	.	.	.	.	.	.	.	.	.	.	.
Vv02g01019692001	.	.	.	.	.	.	.	.	.	.	.	.	.	.	.	.	.	.	.	.
Vv02g01019693001	.	.	.	.	.	.	.	.	.	.	.	.	.	.	.	.	.	.	.	.
Vv02g01019695001	.	.	.	.	.	.	.	.	.	.	.	.	.	.	.	.	.	.	.	.
Vv02g01019696001	.	.	.	.	.	.	.	.	.	.	.	.	.	.	.	.	.	.	.	.
Vv02g01019697001	.	.	.	.	.	.	.	.	.	.	.	.	.	.	.	.	.	.	.	.
Vv02g01019698001	Cs5g01210	Cc5g00021	Cx5g000200	Ci5g128450	.	.	.	.	.	.	.	.	.	.	.	.	.	.	.	.
Vv02g01019699001	Cs5g01200	Cc5g00020	Cx5g000190	Ci5g128460	.	.	.	.	.	.	.	.	.	Vv15g01027463001	.	Cc5g03969	Cx5g039840	.	.	.
Vv02g01019700001	Cs5g01190	Cc5g00019	Cx5g000180	Ci5g128470	.	Ab5g10105	.	.	.	.	.	.	.	.	.	.	.	.	.	.
Vv02g01019702001	.	.	.	.	.	.	.	.	.	.	.	.	.	.	.	.	.	.	.	.
Vv02g01019704001	.	.	.	.	.	.	.	.	.	.	.	.	.	.	.	.	.	.	.	.
Vv02g01019705001	.	.	.	.	.	.	.	.	.	.	.	.	.	.	.	.	.	.	.	.
Vv02g01019706001	Cs5g01170	Cc5g00016	Cx5g000150	Ci5g128500	.	Ab5g31242	.	.	.	.	.	.	.	.	.	.	.	.	.	.
Vv02g01019707001	.	.	.	.	.	.	.	.	.	.	.	.	.	.	.	.	.	.	.	.
Vv02g01019709001	.	.	.	.	.	.	.	.	.	.	.	.	.	.	.	.	.	.	.	.
Vv02g01019710001	.	.	.	.	.	.	.	.	.	.	.	.	.	.	.	.	.	.	.	.
Vv02g01019711001	.	.	.	.	.	.	.	.	.	.	.	.	.	.	.	.	.	.	.	.
Vv02g01019712001	.	.	.	.	.	.	.	.	.	.	.	.	.	.	.	.	.	.	.	.
Vv02g01019713001	.	Cc5g00014	Cx5g000130	.	.	.	.	.	.	.	.	.	.	.	.	.	.	.	.	.
Vv02g01019714001	Cs5g01150	.	.	Ci5g128520	Cm5g244440	.	.	.	.	.	.	.	.	.	.	.	.	.	.	.
Vv02g01019715001	.	.	.	.	.	.	.	.	.	.	.	.	.	.	.	.	.	.	.	.
Vv02g01019716001	Cs5g01130	Cc5g00012	Cx5g000110	Ci5g128540	Cm5g202960	.	.	.	.	.	.	.	.	.	.	.	.	.	.	.
Vv02g01019717001	.	.	.	.	.	.	.	.	.	.	.	.	.	.	.	.	.	.	.	.
Vv02g01019718001	.	.	.	.	.	.	.	.	.	.	.	.	.	.	.	.	.	.	.	.
Vv02g01019719001	Cs5g03940	Cc5g00298	Cx5g000060	Ci5g091570	.	Ab5g10998	.	.	.	.	.	.	.	Vv15g01027509001	.	Cc5g04242	Cx5g042670	.	.	.
Vv02g01019720001	Cs5g01050	Cc5g00004	Cx5g000050	Ci5g128620	Cm5g202890	.	.	.	.	.	.	.	.	.	.	.	.	.	.	.
Vv02g01019722001	Cs5g01040	Cc5g00003	Cx5g000040	Ci5g128630	Cm5g202870	.	.	.	.	.	.	.	.	.	.	.	.	.	.	.
Vv02g01019725001	Cs5g03240	Cc5g00230	Cx5g002350	Ci5g092330	Cm5g051170	Ab5g11062	.	.	.	.	.	.	.	.	.	.	.	.	.	.
Vv02g01019726001	.	.	.	.	.	.	.	.	.	.	.	.	.	.	.	.	.	.	.	.
Vv02g01019727001	.	.	.	.	.	.	.	.	.	.	.	.	.	.	.	.	.	.	.	.
Vv02g01019729001	.	Cc5g00963	Cx5g010110	.	.	.	.	.	.	.	.	.	.	.	.	.	.	.	.	.
Vv02g01019730001	.	.	.	.	.	.	.	.	.	.	.	.	.	.	.	.	.	.	.	.
Vv02g01019731001	Cs5g03400	Cc5g00246	Cx5g002520	Ci5g092170	Cm5g050990	Ab5g11123	.	.	.	.	.	.	.	.	.	.	.	.	.	.
Vv02g01019732001	Cs5g03410	Cc5g00247	Cx5g002530	Ci5g092150	Cm5g050980	Ab5g11264	Vv16g01028895001	Cs9g17710	Cc9g02096	Cx9g027170	Ci9g055270	Cm9g027990	.	.	.	.	.	.	.	.
Vv02g01019733001	Cs5g03420	Cc5g00248	Cx5g002540	Ci5g092140	Cm5g050970	Ab5g11293	Vv16g01028896001	Cs9g17690	.	Cx9g027160	Ci9g055250	.	.	.	.	.	.	.	.	.
Vv02g01019734001	.	.	.	.	.	.	.	.	.	.	.	.	.	.	.	.	.	.	.	.
Vv02g01019736001	.	.	.	.	.	.	.	.	.	.	.	.	.	.	.	.	.	.	.	.
Vv02g01019737001	.	.	.	.	.	.	.	.	.	.	.	.	.	.	.	.	.	.	.	.
Vv02g01019738001	Cs5g10630	.	.	.	.	Ab5g25459	.	.	.	.	.	.	.	.	.	.	.	.	.	.
Vv02g01019739001	.	.	.	.	.	.	.	.	.	.	.	.	.	.	.	.	.	.	.	.
Vv02g01019741001	.	.	.	.	.	.	Vv16g01028898001	Cs9g19450	Cc9g02093	Cx9g027140	Ci9g055400	Cm9g027890	Ab9g21080	.	.	.	.	.	.	.
Vv02g01019743001	Cs5g03460	Cc5g00252	Cx5g002580	Ci5g092090	Cm5g050930	Ab5g10917	.	.	.	.	.	.	.	Vv15g01026942001	.	.	.	.	.	.
Vv02g01019744001	Cs5g03470	Cc5g00253	Cx5g002600	Ci5g092080	Cm5g050920	Ab5g11266	.	.	.	.	.	.	.	Vv15g01026938001	.	Cc5g04173	.	.	.	.
Vv02g01019746001	Cs5g03490	Cc5g00255	Cx5g002620	Ci5g092060	Cm5g050900	Ab5g10698	.	.	.	.	.	.	.	.	.	.	.	.	.	.
Vv02g01019747001	Cs5g03500	Cc5g00256	Cx5g002630	Ci5g092040	Cm5g050890	Ab5g11108	.	.	.	.	.	.	.	Vv15g01026934001	.	Cc5g04177	Cx5g041980	.	.	.
Vv02g01019748001	Cs5g03510	Cc5g00257	Cx5g002640	Ci5g092020	Cm5g050880	.	.	.	.	.	.	.	.	.	.	.	.	.	.	.
Vv02g01019749001	.	.	.	.	.	.	.	.	.	.	.	.	.	.	.	.	.	.	.	.
Vv02g01019750001	Cs5g03530	Cc5g00259	Cx5g002660	Ci5g092000	Cm5g050850	Ab5g11219	.	.	.	.	.	.	.	Vv15g01026927001	.	Cc5g04183	Cx5g042050	.	.	.
Vv02g01019751001	Cs5g03550	Cc5g00261	Cx5g002670	Ci5g091980	.	.	.	.	.	.	.	.	.	.	.	.	.	.	.	.
Vv02g01019752001	.	.	.	.	.	.	.	.	.	.	.	.	.	.	.	.	.	.	.	.
Vv02g01019753001	.	.	.	.	.	.	.	.	.	.	.	.	.	.	.	.	.	.	.	.
Vv02g01019754001	Cs5g03570	Cc5g00264	Cx5g002710	Ci5g091950	.	Ab5g10838	.	.	.	.	.	.	.	.	.	.	.	.	.	.
Vv02g01019755001	Cs5g03590	Cc5g00266	Cx5g002730	Ci5g091930	Cm5g298880	Ab5g11309	.	.	.	.	.	.	.	.	.	.	.	.	.	.
Vv02g01019756001	Cs5g03600	Cc5g00267	Cx5g002740	Ci5g091890	.	Ab5g11113	.	.	.	.	.	.	.	.	.	.	.	.	.	.
Vv02g01019757001	Cs5g03610	Cc5g00268	Cx5g002750	Ci5g091880	.	Ab5g11024	.	.	.	.	.	.	.	.	.	.	.	.	.	.
Vv02g01019758001	Cs5g03620	Cc5g00269	Cx5g002760	Ci5g091870	.	Ab5g11035	.	.	.	.	.	.	.	.	.	.	.	.	.	.
Vv02g01019759001	.	.	.	.	.	.	.	.	.	.	.	.	.	.	.	.	.	.	.	.
Vv02g01019761001	Cs5g03860	Cc5g00291	Cx5g003020	Ci5g091650	.	Ab5g10927	.	.	.	.	.	.	.	.	.	.	.	.	.	.
Vv02g01019762001	.	.	.	.	.	.	.	.	.	.	.	.	.	.	.	.	.	.	.	.
Vv02g01019763001	Cs5g03840	Cc5g00290	.	Ci5g091660	Cm5g130360	Ab5g11294	.	.	.	.	.	.	.	Vv15g01026888001	.	Cc5g04198	Cx5g042180	.	.	.
Vv02g01019765001	Cs5g03830	Cc5g00289	Cx5g003200	Ci5g091670	Cm5g130130	Ab5g11099	.	.	.	.	.	.	.	.	.	.	.	.	.	.
Vv02g01019766001	.	.	.	.	.	.	.	.	.	.	.	.	.	.	.	.	.	.	.	.
Vv02g01019767001	Cs5g04240	Cc5g00288	Cx5g003430	Ci5g091210	.	Ab5g10983	.	.	.	.	.	.	.	.	.	.	.	.	.	.
Vv02g01019768001	Cs5g03810	Cc5g00287	.	Ci5g091700	.	Ab5g10980	.	.	.	.	.	.	.	.	.	.	.	.	.	.
Vv02g01019769001	Cs5g03800	Cc5g00285	.	.	.	Ab5g10997	.	.	.	.	.	.	.	.	.	.	.	.	.	.
Vv02g01019770001	Cs5g03790	Cc5g00284	.	Ci5g115160	.	Ab5g11090	.	.	.	.	.	.	.	.	.	.	.	.	.	.
Vv02g01019771001	.	.	.	.	.	.	.	.	.	.	.	.	.	.	.	.	.	.	.	.
Vv02g01019772001	Cs5g03760	Cc5g00283	.	Ci5g091740	.	Ab5g11040	.	.	.	.	.	.	.	.	.	.	.	.	.	.
Vv02g01019774001	.	.	.	.	.	.	.	.	.	.	.	.	.	.	.	.	.	.	.	.
Vv02g01019775001	.	.	.	.	.	.	Vv16g01028941001	Cs9g17330	Cc9g02059	Cx9g026840	Ci9g054920	Cm9g028280	Ab9g21303	.	.	.	.	.	.	.
Vv02g01019776001	Cs5g03740	Cc5g00281	.	Ci5g091760	.	Ab5g10960	.	.	.	.	.	.	.	.	.	.	.	.	.	.
Vv02g01019778001	.	.	.	.	.	.	.	.	.	.	.	.	.	.	.	.	.	.	.	.
Vv02g01019779001	Cs5g03720	Cc5g00279	.	Ci5g091780	.	Ab5g10817	Vv16g01028968001	Cs9g17310	Cc9g02055	Cx9g026810	Ci9g054900	Cm9g028310	.	Vv15g01026872001	Cs9g17300	.	.	Ci9g054880	Cm9g028320	Ab9g21086
Vv02g01019780001	Cs5g03690	Cc5g00276	.	Ci5g091800	.	Ab5g11154	.	.	.	.	.	.	.	.	.	.	.	.	.	.
Vv02g01019781001	Cs5g03680	Cc5g00275	.	Ci5g091810	.	Ab5g11036	.	.	.	.	.	.	.	.	.	.	.	.	.	.
Vv02g01019782001	Cs5g03660	Cc5g00273	.	Ci5g091830	.	Ab5g11182	Vv16g01028978001	Cs9g17230	Cc9g02049	Cx9g026750	.	Cm9g028390	Ab9g21151	.	.	.	.	.	.	.
Vv02g01019784001	Cs5g03650	Cc5g00272	.	Ci5g091840	.	Ab5g10766	.	.	.	.	.	.	.	.	.	.	.	.	.	.
Vv02g01019785001	Cs5g03630	Cc5g00270	.	Ci5g091860	.	Ab5g10948	Vv16g01028980001	Cs9g17210	Cc9g02047	Cx9g026730	.	Cm9g028410	Ab9g21134	Vv15g01026869001	Cs9g17210	Cc5g04208	Cx5g042290	.	Cm9g028410	Ab9g21134
Vv02g01019787001	.	Cc5g00962	Cx5g010090	.	.	.	.	.	.	.	.	.	.	.	.	.	.	.	.	.
Vv02g01019789001	.	.	.	.	.	.	.	.	.	.	.	.	.	.	.	.	.	.	.	.
Vv02g01019793001	.	.	.	.	.	.	.	.	.	.	.	.	.	.	.	.	.	.	.	.
Vv02g01019794001	.	.	.	.	.	.	.	.	.	.	.	.	.	.	.	.	.	.	.	.
Vv02g01019796001	.	.	.	.	.	.	.	.	.	.	.	.	.	.	.	.	.	.	.	.
Vv02g01019797001	.	.	.	.	.	.	.	.	.	.	.	.	.	.	.	.	.	.	.	.
Vv02g01019798001	.	.	.	.	.	.	.	.	.	.	.	.	.	.	.	.	.	.	.	.
Vv02g01019800001	.	.	.	.	.	.	.	.	.	.	.	.	.	.	.	.	.	.	.	.
Vv02g01019801001	.	.	.	.	.	.	.	.	.	.	.	.	.	.	.	.	.	.	.	.
Vv02g01019802001	Cs5g10600	Cc5g00959	Cx5g010050	.	.	Ab5g25528	.	.	.	.	.	.	.	.	.	.	.	.	.	.
Vv02g01019803001	.	.	.	.	.	.	.	.	.	.	.	.	.	.	.	.	.	.	.	.
Vv02g01019804001	.	.	.	.	.	.	.	.	.	.	.	.	.	.	.	.	.	.	.	.
Vv02g01019805001	.	.	.	.	.	.	.	.	.	.	.	.	.	.	.	.	.	.	.	.
Vv02g01019806001	.	.	.	.	.	.	.	.	.	.	.	.	.	.	.	.	.	.	.	.
Vv02g01019807001	.	.	.	.	.	.	.	.	.	.	.	.	.	Vv15g01026849001	.	Cc5g04214	Cx5g042350	.	.	.
Vv02g01019808001	.	.	.	.	.	.	.	.	.	.	.	.	.	.	.	.	.	.	.	.
Vv02g01019809001	.	.	.	.	.	.	.	.	.	.	.	.	.	.	.	.	.	.	.	.
Vv02g01019810001	.	.	.	.	.	.	.	.	.	.	.	.	.	.	.	.	.	.	.	.
Vv02g01019811001	.	.	.	.	.	.	.	.	.	.	.	.	.	.	.	.	.	.	.	.
Vv02g01019812001	.	.	.	.	.	.	.	.	.	.	.	.	.	.	.	.	.	.	.	.
Vv02g01019815001	.	.	.	.	.	.	.	.	.	.	.	.	.	.	.	.	.	.	.	.
Vv02g01019816001	.	.	.	.	.	.	.	.	.	.	.	.	.	.	.	.	.	.	.	.
Vv02g01019817001	.	.	.	.	.	.	.	.	.	.	.	.	.	.	.	.	.	.	.	.
Vv02g01019818001	.	.	.	.	.	.	.	.	.	.	.	.	.	.	.	.	.	.	.	.
Vv02g01019819001	.	.	.	.	.	.	.	.	.	.	.	.	.	.	.	.	.	.	.	.
Vv02g01019820001	.	.	.	.	.	.	.	.	.	.	.	.	.	.	.	.	.	.	.	.
Vv02g01019821001	.	.	.	.	.	.	.	.	.	.	.	.	.	.	.	.	.	.	.	.
Vv02g01019823001	.	.	.	.	.	.	.	.	.	.	.	.	.	.	.	.	.	.	.	.
Vv02g01019824001	.	.	.	.	.	.	Vv16g01010602001	Cs9g16970	Cc9g02022	Cx9g026460	Ci9g292310	Cm9g299160	Ab9g21311	.	.	.	.	.	.	.
Vv02g01019825001	.	.	.	.	.	.	.	.	.	.	.	.	.	.	.	.	.	.	.	.
Vv02g01019826001	.	.	.	.	.	.	.	.	.	.	.	.	.	Vv15g01027503001	.	Cc5g04238	Cx5g042630	.	.	.
Vv02g01019827001	.	.	.	.	.	.	.	.	.	.	.	.	.	.	.	.	.	.	.	.
Vv02g01019829001	.	.	.	.	.	.	.	.	.	.	.	.	.	.	.	.	.	.	.	.
Vv02g01019830001	.	.	.	.	.	.	.	.	.	.	.	.	.	.	.	.	.	.	.	.
Vv02g01019832001	.	.	.	.	.	.	.	.	.	.	.	.	.	.	.	.	.	.	.	.
Vv02g01019833001	.	.	.	.	.	.	.	.	.	.	.	.	.	.	.	.	.	.	.	.
Vv02g01019834001	.	.	.	.	.	.	.	.	.	.	.	.	.	.	.	.	.	.	.	.
Vv02g01019835001	Cs5g10560	Cc5g00953	Cx5g010020	Ci5g288990	.	Ab5g25491	.	.	.	.	.	.	.	.	.	.	.	.	.	.
Vv02g01019836001	Cs5g10550	Cc5g00952	Cx5g010010	Ci5g288970	.	Ab5g25497	.	.	.	.	.	.	.	.	.	.	.	.	.	.
Vv02g01019838001	.	.	.	.	.	.	.	.	.	.	.	.	.	.	.	.	.	.	.	.
Vv02g01019840001	.	Cc5g00951	Cx5g010000	.	.	.	.	.	.	.	.	.	.	.	.	.	.	.	.	.
Vv02g01019841001	.	.	.	.	.	.	.	.	.	.	.	.	.	.	.	.	.	.	.	.
Vv02g01019842001	.	.	.	.	.	.	.	.	.	.	.	.	.	.	.	.	.	.	.	.
Vv02g01019848001	.	.	.	.	.	.	.	.	.	.	.	.	.	.	.	.	.	.	.	.
Vv02g01019849001	.	.	.	.	.	.	.	.	.	.	.	.	.	.	.	.	.	.	.	.
Vv02g01019850001	.	.	.	.	.	.	.	.	.	.	.	.	.	.	.	.	.	.	.	.
Vv02g01019851001	.	.	.	.	.	.	.	.	.	.	.	.	.	.	.	.	.	.	.	.
Vv02g01019852001	.	.	.	.	.	.	.	.	.	.	.	.	.	.	.	.	.	.	.	.
Vv02g01019854001	Cs5g10330	Cc5g00929	Cx5g009790	.	.	Ab5g13192	Vv16g01010614001	Cs9g16920	Cc9g02014	Cx9g026410	.	Cm5g014100	Ab9g21264	Vv15g01027514001	.	Cc5g04246	Cx5g042710	.	.	.
Vv02g01019855001	Cs5g10320	Cc5g00928	Cx5g009780	.	.	Ab5g13201	Vv16g01010616001	Cs9g16910	Cc9g02013	Cx9g026400	.	Cm5g014110	Ab9g21056	.	.	.	.	.	.	.
Vv02g01019856001	Cs5g10310	Cc5g00927	Cx5g009770	.	.	Ab5g13177	.	.	.	.	.	.	.	.	.	.	.	.	.	.
Vv02g01019857001	Cs5g10290	Cc5g00926	Cx5g009760	.	.	Ab5g13175	.	.	.	.	.	.	.	.	.	.	.	.	.	.
Vv02g01019858001	.	.	.	.	.	.	.	.	.	.	.	.	.	.	.	.	.	.	.	.
Vv02g01019859001	.	.	.	.	.	.	.	.	.	.	.	.	.	.	.	.	.	.	.	.
Vv02g01019860001	Cs5g10240	Cc5g00922	Cx5g009710	.	.	Ab5g13183	Vv16g01010629001	Cs9g16820	Cc9g02003	.	.	Cm5g014170	Ab9g21257	.	.	.	.	.	.	.
Vv02g01019861001	.	.	.	.	.	.	.	.	.	.	.	.	.	.	.	.	.	.	.	.
Vv02g01019863001	Cs5g10230	Cc5g00921	Cx5g009700	.	.	Ab5g13193	.	.	.	.	.	.	.	.	.	.	.	.	.	.
Vv02g01019865001	Cs5g10220	Cc5g00919	.	.	Cm3g111720	Ab5g13178	.	.	.	.	.	.	.	.	.	.	.	.	.	.
Vv02g01019866001	Cs5g10210	Cc5g00918	Cx5g009690	.	.	Ab5g13184	.	.	.	.	.	.	.	.	.	.	.	.	.	.
Vv02g01019867001	.	.	.	.	.	.	.	.	.	.	.	.	.	Vv15g01026837001	.	.	.	.	.	.
Vv02g01019868001	.	.	.	.	.	.	.	.	.	.	.	.	.	.	.	.	.	.	.	.
Vv02g01019869001	Cs5g10190	Cc5g00915	Cx5g009670	.	.	Ab5g13191	.	.	.	.	.	.	.	.	.	.	.	.	.	.
Vv02g01019870001	Cs5g10180	Cc5g00914	.	.	Cm3g111760	Ab5g13206	.	.	.	.	.	.	.	.	.	.	.	.	.	.
Vv02g01019871001	Cs5g10170	Cc5g00913	Cx5g009650	.	.	Ab5g13204	Vv16g01010649001	.	Cc9g01989	.	.	.	.	.	.	.	.	.	.	.
Vv02g01019872001	.	.	.	.	.	.	.	.	.	.	.	.	.	.	.	.	.	.	.	.
Vv02g01019873001	.	.	.	.	.	.	.	.	.	.	.	.	.	.	.	.	.	.	.	.
Vv02g01019874001	Cs5g10150	Cc5g00911	Cx5g009640	.	.	Ab5g13187	Vv16g01010653001	.	Cc9g01988	Cx9g026110	.	.	.	.	.	.	.	.	.	.
Vv02g01019875001	Cs5g10140	Cc5g00910	Cx5g009630	.	.	Ab5g13203	Vv16g01018434001	Cs9g16610	Cc9g01987	.	.	Cm5g014300	Ab9g21276	.	.	.	.	.	.	.
Vv02g01019876001	Cs5g10130	Cc5g00909	Cx5g009620	Ci5g299230	.	Ab5g13205	.	.	.	.	.	.	.	.	.	.	.	.	.	.
Vv02g01019877001	.	.	.	.	.	.	.	.	.	.	.	.	.	.	.	.	.	.	.	.
Vv02g01019878001	Cs5g10110	Cc5g00906	Cx5g009590	.	.	Ab5g13197	.	.	.	.	.	.	.	.	.	.	.	.	.	.
Vv02g01019879001	Cs5g10090	Cc5g00905	Cx5g009580	.	.	Ab5g13179	.	.	.	.	.	.	.	.	.	.	.	.	.	.
Vv02g01019880001	Cs5g10080	Cc5g00903	Cx5g009560	.	.	Ab5g13190	.	.	.	.	.	.	.	.	.	.	.	.	.	.
Vv02g01019881001	Cs5g10060	Cc5g00902	Cx5g009550	Ci5g164040	.	Ab5g13202	.	.	.	.	.	.	.	.	.	.	.	.	.	.
Vv02g01019883001	Cs5g10050	Cc5g00901	Cx5g009540	.	.	Ab5g29091	.	.	.	.	.	.	.	.	.	.	.	.	.	.
Vv02g01019884001	Cs5g10040	.	Cx5g009510	.	.	Ab5g29073	.	.	.	.	.	.	.	.	.	.	.	.	.	.
Vv02g01019886001	.	Cc5g00899	.	.	.	.	.	.	.	.	.	.	.	.	.	.	.	.	.	.
Vv02g01019887001	Cs5g10030	Cc5g00898	Cx5g009500	.	.	Ab5g29097	.	.	.	.	.	.	.	.	.	.	.	.	.	.
Vv02g01019888001	Cs5g10020	Cc5g00897	Cx5g009490	.	.	Ab5g29061	.	.	.	.	.	.	.	.	.	.	.	.	.	.
Vv02g01019889001	Cs5g10010	Cc5g00896	Cx5g009480	.	Cm5g014510	Ab5g29191	.	.	.	.	.	.	.	.	.	.	.	.	.	.
Vv02g01019890001	Cs5g09980	Cc5g00894	Cx5g009440	.	.	Ab5g29066	.	.	.	.	.	.	.	.	.	.	.	.	.	.
Vv02g01019892001	.	.	.	.	.	.	.	.	.	.	.	.	.	.	.	.	.	.	.	.
Vv02g01019893001	Cs5g09960	Cc5g00892	Cx5g009410	.	Cm3g111890	Ab5g29045	.	.	.	.	.	.	.	Vv15g01027570001	.	.	.	.	.	.
Vv02g01019894001	.	Cc5g00891	.	.	.	.	.	.	.	.	.	.	.	.	.	.	.	.	.	.
Vv02g01019895001	Cs5g09940	Cc5g00888	Cx5g009390	Ci5g218090	.	Ab5g29052	.	.	.	.	.	.	.	.	.	.	.	.	.	.
Vv02g01019896001	Cs5g09930	Cc5g00887	Cx5g009380	Ci5g218080	.	Ab5g29140	.	.	.	.	.	.	.	.	.	.	.	.	.	.
Vv02g01019897001	.	.	.	.	.	.	.	.	.	.	.	.	.	.	.	.	.	.	.	.
Vv02g01019899001	.	.	.	.	.	.	.	.	.	.	.	.	.	.	.	.	.	.	.	.
Vv02g01019900001	.	.	.	.	.	.	.	.	.	.	.	.	.	.	.	.	.	.	.	.
Vv02g01019901001	.	.	.	.	.	.	.	.	.	.	.	.	.	.	.	.	.	.	.	.
Vv02g01019902001	Cs5g09900	Cc5g00882	Cx5g009340	Ci5g218040	.	Ab5g29218	.	.	.	.	.	.	.	.	.	.	.	.	.	.
Vv02g01019903001	Cs5g09890	Cc5g00881	Cx5g009330	.	.	Ab5g29071	.	.	.	.	.	.	.	.	.	.	.	.	.	.
Vv02g01019905001	.	.	.	.	.	.	.	.	.	.	.	.	.	.	.	.	.	.	.	.
Vv02g01019908001	.	.	.	.	.	.	.	.	.	.	.	.	.	.	.	.	.	.	.	.
Vv02g01019909001	.	.	.	.	.	.	.	.	.	.	.	.	.	.	.	.	.	.	.	.
Vv02g01019910001	.	.	.	.	.	.	.	.	.	.	.	.	.	.	.	.	.	.	.	.
Vv02g01019911001	.	.	.	.	.	.	.	.	.	.	.	.	.	.	.	.	.	.	.	.
Vv02g01019912001	.	.	.	.	.	.	.	.	.	.	.	.	.	.	.	.	.	.	.	.
Vv02g01019913001	Cs5g09850	Cc5g00878	.	Ci5g218000	.	Ab5g29182	.	.	.	.	.	.	.	.	.	.	.	.	.	.
Vv02g01019914001	Cs5g09840	Cc5g00877	Cx5g009280	Ci5g217990	.	Ab5g29092	.	.	.	.	.	.	.	.	.	.	.	.	.	.
Vv02g01019915001	Cs5g09820	Cc5g00875	Cx5g009260	Ci5g217970	.	Ab5g29197	.	.	.	.	.	.	.	.	.	.	.	.	.	.
Vv02g01019916001	.	.	.	.	.	.	.	.	.	.	.	.	.	.	.	.	.	.	.	.
Vv02g01019917001	.	.	.	.	.	.	.	.	.	.	.	.	.	.	.	.	.	.	.	.
Vv02g01019918001	Cs5g09810	Cc5g00874	Cx5g009250	Ci5g217950	.	Ab5g29098	.	.	.	.	.	.	.	.	.	.	.	.	.	.
Vv02g01019919001	.	.	.	.	.	.	.	.	.	.	.	.	.	.	.	.	.	.	.	.
Vv02g01019920001	Cs5g09790	Cc5g00873	Cx5g009230	Ci5g217920	.	Ab5g29232	Vv16g01018494001	.	Cc9g01939	Cx9g025640	.	.	.	.	.	.	.	.	.	.
Vv02g01019921001	Cs5g09780	Cc5g00871	Cx5g009210	Ci5g217900	.	Ab5g29125	.	.	.	.	.	.	.	.	.	.	.	.	.	.
Vv02g01019922001	.	.	.	.	.	.	.	.	.	.	.	.	.	.	.	.	.	.	.	.
Vv02g01019923001	Cs5g09760	Cc5g00869	Cx5g009190	Ci5g217880	.	Ab5g29212	.	.	.	.	.	.	.	.	.	.	.	.	.	.
Vv02g01019924001	.	.	.	.	.	.	.	.	.	.	.	.	.	.	.	.	.	.	.	.
Vv02g01019925001	.	.	.	.	.	.	.	.	.	.	.	.	.	.	.	.	.	.	.	.
Vv02g01019926001	.	.	.	.	.	.	.	.	.	.	.	.	.	.	.	.	.	.	.	.
Vv02g01019927001	Cs5g09740	Cc5g00867	Cx5g009170	Ci5g217860	.	Ab5g29165	.	.	.	.	.	.	.	.	.	.	.	.	.	.
Vv02g01019928001	.	.	.	.	.	.	.	.	.	.	.	.	.	.	.	.	.	.	.	.
Vv02g01019929001	.	.	.	.	.	.	.	.	.	.	.	.	.	.	.	.	.	.	.	.
Vv02g01019930001	.	.	.	.	.	.	.	.	.	.	.	.	.	.	.	.	.	.	.	.
Vv02g01019931001	.	.	.	.	.	.	.	.	.	.	.	.	.	.	.	.	.	.	.	.
Vv02g01019932001	Cs5g09720	Cc5g00865	Cx5g009150	Ci5g217840	Cm3g112100	Ab5g29225	.	.	.	.	.	.	.	.	.	.	.	.	.	.
Vv02g01019933001	.	.	.	.	.	.	.	.	.	.	.	.	.	.	.	.	.	.	.	.
Vv02g01019935001	Cs5g09690	Cc5g00861	Cx5g009120	Ci5g217810	.	Ab5g29166	.	.	.	.	.	.	.	.	.	.	.	.	.	.
Vv02g01019937001	Cs5g09680	Cc5g00860	Cx5g009110	Ci5g217790	Cm3g112170	Ab5g29132	Vv16g01018513001	Cs9g16000	Cc9g01929	Cx9g025550	.	Cm5g014890	Ab9g21100	.	.	.	.	.	.	.
Vv02g01019939001	Cs5g09660	Cc5g00858	Cx5g009100	Ci5g217780	.	Ab5g29207	.	.	.	.	.	.	.	.	.	.	.	.	.	.
Vv02g01019940001	.	Cc5g00857	Cx5g009090	.	.	.	.	.	.	.	.	.	.	.	.	.	.	.	.	.
Vv02g01019941001	Cs5g09650	Cc5g00856	Cx5g009080	Ci5g217770	.	Ab5g29154	.	.	.	.	.	.	.	Vv15g01027615001	.	.	.	.	.	.
Vv02g01019942001	Cs5g09640	Cc5g00855	Cx5g009070	Ci5g217760	.	Ab5g29046	.	.	.	.	.	.	.	.	.	.	.	.	.	.
Vv02g01004902001	.	.	.	.	.	.	.	.	.	.	.	.	.	.	.	.	.	.	.	.
Vv02g01004903001	.	.	.	.	.	.	.	.	.	.	.	.	.	.	.	.	.	.	.	.
Vv02g01004904001	.	.	.	.	.	.	.	.	.	.	.	.	.	.	.	.	.	.	.	.
Vv02g01004905001	.	.	.	.	.	.	.	.	.	.	.	.	.	.	.	.	.	.	.	.
Vv02g01004906001	Cs5g09600	Cc5g00851	Cx5g009040	Ci5g217720	.	Ab5g29177	Vv16g01018521001	Cs9g15940	Cc9g01924	Cx9g025510	.	Cm5g014990	Ab9g21111	.	.	.	.	.	.	.
Vv02g01004907001	Cs5g09580	Cc5g00848	Cx5g009000	Ci5g151300	.	Ab5g29082	.	.	.	.	.	.	.	.	.	.	.	.	.	.
Vv02g01004908001	Cs5g09570	Cc5g00845	Cx5g008990	Ci5g151290	Cm3g112260	Ab5g29187	.	.	.	.	.	.	.	.	.	.	.	.	.	.
Vv02g01004909001	.	Cc5g00844	Cx5g008980	.	.	.	.	.	.	.	.	.	.	.	.	.	.	.	.	.
Vv02g01004910001	Cs5g09560	Cc5g00843	Cx5g008970	.	Cm3g112280	Ab5g29205	.	.	.	.	.	.	.	Vv15g01027632001	.	Cc5g04320	Cx5g043370	.	.	.
Vv02g01004911001	Cs5g09540	Cc5g00842	Cx5g008960	Ci5g151260	.	Ab5g29107	.	.	.	.	.	.	.	.	.	.	.	.	.	.
Vv02g01004912001	.	.	.	.	.	.	.	.	.	.	.	.	.	.	.	.	.	.	.	.
Vv02g01004913001	.	.	.	.	.	.	.	.	.	.	.	.	.	.	.	.	.	.	.	.
Vv02g01004914001	Cs5g09510	Cc5g00840	Cx5g008940	Ci5g151240	.	Ab5g29067	.	.	.	.	.	.	.	.	.	.	.	.	.	.
Vv02g01004915001	.	.	.	.	.	.	.	.	.	.	.	.	.	.	.	.	.	.	.	.
Vv02g01004916001	Cs5g09500	Cc5g00839	Cx5g008930	Ci5g151230	.	Ab5g29119	.	.	.	.	.	.	.	.	.	.	.	.	.	.
Vv02g01004919001	Cs5g09480	Cc5g00837	Cx5g008920	Ci5g151210	Cm5g013910	Ab5g29121	Vv16g01018554001	Cs9g14180	Cc9g01909	Cx9g025400	Ci9g170030	.	Ab9g25634	.	.	.	.	.	.	.
Vv02g01004920001	.	.	.	.	.	.	.	.	.	.	.	.	.	.	.	.	.	.	.	.
Vv02g01001263001	Cs5g09290	Cc5g00819	Cx5g008690	Ci5g150980	Cm3g112490	Ab5g29217	.	.	.	.	.	.	.	.	.	.	.	.	.	.
Vv02g01001264001	.	.	.	.	.	.	.	.	.	.	.	.	.	.	.	.	.	.	.	.
Vv02g01001265001	.	.	.	.	.	.	.	.	.	.	.	.	.	.	.	.	.	.	.	.
Vv02g01001267001	Cs5g09260	Cc5g00817	Cx5g008660	Ci5g150950	.	Ab5g29094	.	.	.	.	.	.	.	.	.	.	.	.	.	.
Vv02g01001268001	Cs5g09250	.	.	.	.	.	.	.	.	.	.	.	.	.	.	.	.	.	.	.
Vv02g01001269001	Cs5g09240	Cc5g00816	Cx5g008650	Ci5g150940	Cm3g112520	Ab5g29196	.	.	.	.	.	.	.	.	.	.	.	.	.	.
Vv02g01001270001	.	.	.	.	.	.	.	.	.	.	.	.	.	.	.	.	.	.	.	.
Vv02g01001272001	Cs5g09220	Cc5g00814	Cx5g008630	Ci5g150920	.	Ab5g29040	Vv16g01018625001	Cs9g14590	Cc9g01865	Cx9g024960	Ci9g251890	Cm9g186770	Ab9g25632	.	.	.	.	.	.	.
Vv02g01001274001	Cs5g07850	Cc5g00680	Cx5g008620	Ci5g203650	Cm5g056750	Ab5g10681	.	.	.	.	.	.	.	.	.	.	.	.	.	.
Vv02g01001275001	Cs5g09200	Cc5g00812	Cx5g008610	Ci5g150900	.	Ab5g29117	Vv16g01018628001	Cs9g14600	Cc9g01864	.	.	Cm9g186780	Ab9g25542	.	.	.	.	.	.	.
Vv02g01001276001	.	.	.	.	.	.	.	.	.	.	.	.	.	.	.	.	.	.	.	.
Vv02g01001277001	Cs5g09180	Cc5g00810	Cx5g008590	Ci5g150880	.	Ab5g29172	.	.	.	.	.	.	.	.	.	.	.	.	.	.
Vv02g01001278001	Cs5g09170	Cc5g00809	Cx5g008580	Ci5g150870	.	Ab5g29145	.	.	.	.	.	.	.	.	.	.	.	.	.	.
Vv02g01001279001	Cs5g09150	Cc5g00807	Cx5g008570	Ci5g150850	Cm3g112540	Ab5g29043	.	.	.	.	.	.	.	.	.	.	.	.	.	.
Vv02g01001280001	Cs5g09140	Cc5g00806	Cx5g008560	Ci5g150820	.	Ab5g29169	.	.	.	.	.	.	.	.	.	.	.	.	.	.
Vv02g01001281001	.	.	.	.	.	.	.	.	.	.	.	.	.	.	.	.	.	.	.	.
Vv02g01001282001	Cs5g09130	Cc5g00805	Cx5g008540	Ci5g150790	.	Ab5g29224	.	.	.	.	.	.	.	.	.	.	.	.	.	.
Vv02g01001284001	.	.	.	.	.	.	.	.	.	.	.	.	.	.	.	.	.	.	.	.
Vv02g01001285001	Cs5g09120	Cc5g00804	Cx5g008530	Ci5g150760	.	Ab5g29149	.	.	.	.	.	.	.	.	.	.	.	.	.	.
Vv02g01001286001	.	.	.	.	.	.	.	.	.	.	.	.	.	.	.	.	.	.	.	.
Vv02g01001287001	.	Cc5g00802	Cx5g008510	.	.	.	.	.	.	.	.	.	.	.	.	.	.	.	.	.
Vv02g01001290001	.	.	.	.	.	.	.	.	.	.	.	.	.	.	.	.	.	.	.	.
Vv02g01001291001	.	.	.	.	.	.	.	.	.	.	.	.	.	.	.	.	.	.	.	.
Vv02g01001292001	.	.	.	.	.	.	.	.	.	.	.	.	.	.	.	.	.	.	.	.
Vv02g01001293001	.	.	.	.	.	.	.	.	.	.	.	.	.	.	.	.	.	.	.	.
Vv02g01001296001	Cs5g09080	Cc5g00797	Cx5g008450	Ci5g150680	Cm5g284370	.	.	.	.	.	.	.	.	Vv15g01027641001	.	.	Cx5g043660	.	.	.
Vv02g01001297001	.	.	Cx5g008430	.	.	.	.	.	.	.	.	.	.	.	.	.	.	.	.	.
Vv02g01001298001	Cs5g09070	Cc5g00796	.	Ci5g150670	Cm5g284360	Ab5g29090	.	.	.	.	.	.	.	.	.	.	.	.	.	.
Vv02g01001299001	Cs5g09060	Cc5g00795	.	Ci5g150660	.	Ab5g29120	.	.	.	.	.	.	.	.	.	.	.	.	.	.
Vv02g01001301001	.	.	.	.	.	.	.	.	.	.	.	.	.	.	.	.	.	.	.	.
Vv02g01001302001	.	.	.	.	.	.	.	.	.	.	.	.	.	.	.	.	.	.	.	.
Vv02g01001303001	Cs5g09020	Cc5g00790	Cx5g008390	Ci5g150610	Cm5g237790	Ab5g29112	.	.	.	.	.	.	.	.	.	.	.	.	.	.
Vv02g01001304001	.	.	.	.	.	.	.	.	.	.	.	.	.	.	.	.	.	.	.	.
Vv02g01001305001	Cs5g09010	Cc5g00789	Cx5g008380	Ci5g150600	.	Ab5g29203	.	.	.	.	.	.	.	.	.	.	.	.	.	.
Vv02g01001306001	.	.	.	.	.	.	.	.	.	.	.	.	.	.	.	.	.	.	.	.
Vv02g01001307001	Cs5g08990	Cc5g00787	Cx5g008360	.	.	Ab5g29047	.	.	.	.	.	.	.	.	.	.	.	.	.	.
Vv02g01001308001	Cs5g08980	Cc5g00786	Cx5g008350	Ci5g248770	.	Ab5g29220	.	.	.	.	.	.	.	Vv15g01027680001	.	Cc5g04353	Cx5g043700	.	.	.
Vv02g01001310001	Cs5g08960	Cc5g00785	Cx5g008330	.	Cm5g212950	Ab5g29134	.	.	.	.	.	.	.	.	.	.	.	.	.	.
Vv02g01001311001	.	.	.	.	.	.	.	.	.	.	.	.	.	.	.	.	.	.	.	.
Vv02g01001312001	Cs5g08950	Cc5g00783	Cx5g008320	.	Cm5g212930	Ab5g29201	.	.	.	.	.	.	.	.	.	.	.	.	.	.
Vv02g01001313001	.	.	.	.	.	.	.	.	.	.	.	.	.	.	.	.	.	.	.	.
Vv02g01001314001	.	.	.	.	.	.	.	.	.	.	.	.	.	.	.	.	.	.	.	.
Vv02g01001315001	Cs5g08940	Cc5g00782	Cx5g008310	.	Cm5g212910	Ab5g29222	Vv16g01018654001	Cs9g14675	Cc9g01856	.	Ci9g247260	Cm9g186870	Ab9g25652	.	.	.	.	.	.	.
Vv02g01001316001	.	.	.	.	.	.	.	.	.	.	.	.	.	.	.	.	.	.	.	.
Vv02g01001317001	Cs5g08930	Cc5g00781	Cx5g008300	Ci5g260660	Cm5g212900	.	.	.	.	.	.	.	.	Vv15g01027683001	.	Cc5g04356	Cx5g043740	.	.	.
Vv02g01001318001	Cs5g08920	Cc5g00780	Cx5g008290	Ci5g277690	Cm5g212890	Ab5g29110	.	.	.	.	.	.	.	.	.	.	.	.	.	.
Vv02g01001319001	Cs5g08900	Cc5g00778	Cx5g008270	Ci5g288680	Cm5g212870	Ab5g29147	.	.	.	.	.	.	.	.	.	.	.	.	.	.
Vv02g01001320001	Cs5g08890	Cc5g00777	Cx5g008260	Ci5g125450	Cm5g212850	Ab5g29214	.	.	.	.	.	.	.	.	.	.	.	.	.	.
Vv02g01001321001	Cs5g08880	Cc5g00776	Cx5g008250	Ci5g125470	Cm5g212830	Ab5g29126	.	.	.	.	.	.	.	.	.	.	.	.	.	.
Vv02g01001327001	Cs5g08840	Cc5g00771	Cx5g008210	Ci5g125530	Cm5g212790	.	.	.	.	.	.	.	.	.	.	.	.	.	.	.
Vv02g01001328001	Cs5g08830	Cc5g00770	Cx5g008200	Ci5g125540	Cm5g212780	Ab5g29039	.	.	.	.	.	.	.	.	.	.	.	.	.	.
Vv02g01007148001	.	.	Cx5g007770	.	.	.	.	.	.	.	.	.	.	.	.	.	.	.	.	.
Vv02g01007149001	Cs5g08410	Cc5g00731	.	Ci5g126000	.	Ab5g29108	.	.	.	.	.	.	.	.	.	.	.	.	.	.
Vv02g01007150001	.	.	.	.	.	.	.	.	.	.	.	.	.	.	.	.	.	.	.	.
Vv02g01007151001	.	.	.	.	.	.	.	.	.	.	.	.	.	.	.	.	.	.	.	.
Vv02g01007152001	.	.	.	.	.	.	.	.	.	.	.	.	.	.	.	.	.	.	.	.
Vv02g01004822001	.	.	.	.	.	.	Vv16g01024502001	.	.	.	.	.	.	.	.	.	.	.	.	.
Vv02g01004823001	.	.	.	.	.	.	.	.	.	.	.	.	.	.	.	.	.	.	.	.
Vv02g01004825001	Cs5g07730	Cc5g00669	.	.	.	Ab5g10773	.	.	.	.	.	.	.	.	.	.	.	.	.	.
Vv02g01004826001	.	.	.	.	.	.	.	.	.	.	.	.	.	.	.	.	.	.	.	.
Vv02g01004827001	.	Cc7g00949	.	.	.	.	Vv16g01024506001	.	.	.	.	.	.	.	.	.	.	.	.	.
Vv02g01004831001	.	.	.	.	.	.	.	.	.	.	.	.	.	.	.	.	.	.	.	.
Vv02g01004832001	Cs7g22750	.	.	.	Cm7g270480	Ab7g32606	Vv16g01013815001	.	.	.	.	.	.	.	.	.	.	.	.	.
Vv02g01004833001	.	.	.	.	.	.	.	.	.	.	.	.	.	.	.	.	.	.	.	.
Vv02g01004835001	.	Cc5g00668	.	.	.	.	Vv16g01013825001	.	.	.	.	.	.	.	.	.	.	.	.	.
Vv02g01004836001	.	.	Cx5g007270	.	.	.	Vv16g01013894001	.	.	.	.	.	.	.	.	.	.	.	.	.
Vv02g01004837001	.	.	.	.	.	.	.	.	.	.	.	.	.	.	.	.	.	.	.	.
Vv02g01004838001	Cs5g07710	Cc5g00667	Cx5g007260	Ci5g203780	Cm5g056600	Ab5g11000	.	.	.	.	.	.	.	.	.	.	.	.	.	.
Vv02g01004839001	.	.	.	.	.	.	.	.	.	.	.	.	.	.	.	.	.	.	.	.
Vv02g01004840001	.	.	.	.	.	.	.	.	.	.	.	.	.	.	.	.	.	.	.	.
Vv02g01004841001	.	.	.	.	.	.	.	.	.	.	.	.	.	.	.	.	.	.	.	.
Vv02g01004842001	Cs5g07690	Cc5g00665	Cx5g007240	Ci5g203800	Cm5g056580	Ab5g11140	.	.	.	.	.	.	.	.	.	.	.	.	.	.
Vv02g01004843001	.	.	.	.	.	.	.	.	.	.	.	.	.	.	.	.	.	.	.	.
Vv02g01004844001	.	.	.	.	.	.	.	.	.	.	.	.	.	.	.	.	.	.	.	.
Vv02g01013288001	.	.	.	.	.	.	.	.	.	.	.	.	.	.	.	.	.	.	.	.
Vv02g01013286001	.	.	.	.	.	.	.	.	.	.	.	.	.	.	.	.	.	.	.	.
Vv02g01013285001	.	.	.	.	.	.	.	.	.	.	.	.	.	.	.	.	.	.	.	.
Vv02g01013284001	.	.	.	.	.	.	.	.	.	.	.	.	.	.	.	.	.	.	.	.
Vv02g01013283001	Cs5g07640	Cc5g00663	Cx5g007190	Ci5g203920	Cm5g056520	Ab5g10824	.	.	.	.	.	.	.	.	.	.	.	.	.	.
Vv02g01013282001	Cs5g07630	Cc5g00662	Cx5g007180	Ci5g203930	Cm5g056510	Ab5g10894	.	.	.	.	.	.	.	.	.	.	.	.	.	.
Vv02g01013280001	Cs5g07620	Cc5g00660	Cx5g007170	Ci5g203940	Cm5g056500	Ab5g10938	.	.	.	.	.	.	.	.	.	.	.	.	.	.
Vv02g01013279001	.	.	.	.	.	.	.	.	.	.	.	.	.	.	.	.	.	.	.	.
Vv02g01013278001	Cs5g07610	Cc5g00659	Cx5g007160	Ci5g203950	Cm5g056490	Ab5g11083	.	.	.	.	.	.	.	.	.	.	.	.	.	.
Vv02g01013277001	Cs7g24910	Cc5g00658	Cx5g007150	.	.	Ab7g31700	.	.	.	.	.	.	.	.	.	.	.	.	.	.
Vv02g01013276001	Cs5g07590	Cc5g00657	Cx5g007140	Ci5g203980	Cm5g056460	Ab5g11274	.	.	.	.	.	.	.	.	.	.	.	.	.	.
Vv02g01013275001	.	.	.	.	.	.	.	.	.	.	.	.	.	.	.	.	.	.	.	.
Vv02g01013273001	.	.	.	.	.	.	.	.	.	.	.	.	.	.	.	.	.	.	.	.
Vv02g01013272001	Cs5g07550	Cc5g00654	Cx5g007130	Ci5g204010	Cm5g056430	Ab5g10831	.	.	.	.	.	.	.	.	.	.	.	.	.	.
Vv02g01013271001	Cs5g07540	Cc5g00653	Cx5g007110	Ci5g204020	Cm5g056420	Ab5g10933	.	.	.	.	.	.	.	.	.	.	.	.	.	.
Vv02g01013270001	Cs5g07530	Cc5g00652	Cx5g007100	Ci5g204030	Cm5g056410	Ab5g11070	.	.	.	.	.	.	.	.	.	.	.	.	.	.
Vv02g01013268001	.	Cc5g00651	.	.	.	.	.	.	.	.	.	.	.	.	.	.	.	.	.	.
Vv02g01013267001	.	.	.	.	.	.	.	.	.	.	.	.	.	.	.	.	.	.	.	.
Vv02g01013266001	Cs5g07400	Cc5g00647	Cx5g007010	Ci5g271840	Cm5g056270	Ab5g10954	.	.	.	.	.	.	.	.	.	.	.	.	.	.
Vv02g01013265001	Cs5g07390	Cc5g00646	Cx5g007000	Ci5g271830	Cm5g056260	Ab5g11141	.	.	.	.	.	.	.	.	.	.	.	.	.	.
Vv02g01013264001	Cs5g07380	Cc5g00645	Cx5g006990	Ci5g271820	Cm5g056250	Ab5g11026	.	.	.	.	.	.	.	.	.	.	.	.	.	.
Vv02g01013263001	.	.	.	.	.	.	.	.	.	.	.	.	.	.	.	.	.	.	.	.
Vv02g01013262001	.	.	.	.	.	.	.	.	.	.	.	.	.	.	.	.	.	.	.	.
Vv02g01013261001	.	.	.	.	.	.	.	.	.	.	.	.	.	.	.	.	.	.	.	.
Vv02g01013260001	.	.	.	.	.	.	.	.	.	.	.	.	.	.	.	.	.	.	.	.
Vv02g01013259001	.	.	.	.	.	.	.	.	.	.	.	.	.	.	.	.	.	.	.	.
Vv02g01013258001	.	.	.	.	.	.	.	.	.	.	.	.	.	.	.	.	.	.	.	.
Vv02g01013257001	.	.	.	.	.	.	.	.	.	.	.	.	.	.	.	.	.	.	.	.
Vv02g01013255001	.	.	.	.	.	.	.	.	.	.	.	.	.	.	.	.	.	.	.	.
[truncated: 22,231 more rows]

## Sheet: Table S6
Supplementary Tables 6. Orthologous fragments in Rutaceae plants and their relative with grape as reference
Vv_chro	start	end	Cs_chro	start	end	Vv_chro	start	end	Cc_chro	start	end	Vv_chro	start	end	Cg_chro	start	end	Vv_chro	start	end	Cm_chro	start	end	Vv_chro	start	end	Ci_chro	start	end	Vv_chro	start	end	Ab_chro	start	end
Vv01g	89	155	Cs2g	1039	1108	Vv01g	3	87	Cc7g	1698	2288	Vv01g	3	70	Cg7g	1587	1653	Vv01g	3	58	Cm7g	1146	1210	Vv01g	1	70	Ci7g	1320	1398	Vv01g	3	58	Ab7g	1208	1269
	187	314	Cs7g	1162	1329		89	180	Cc2g	2212	2344		89	155	Cg2g	3700	3767		117	534	Cm2g	1115	1790		89	155	Ci2g	1515	1581		89	180	Ab2g	1277	1648
	315	552	Cs2g	1172	1738		210	314	Cc7g	1558	1646		181	314	Cg7g	1349	1529		589	1346	Cm7g	24	1295		231	314	Ci7g	1506	1580		210	314	Ab7g	1057	1148
	592	1346	Cs7g	184	1161		315	586	Cc2g	1826	2150		315	586	Cg2g	2848	3635		1350	1380	Cm8g	1159	1197		315	518	Ci2g	1625	2239		315	586	Ab2g	1383	2043
Vv02g	2	597	Cs5g	3	984		592	1035	Cc7g	1654	2243		592	1346	Cg7g	1536	2227	Vv02g	2	610	Cm5g	11	2586		592	1346	Ci7g	214	1443		593	1387	Ab7g	240	1700
	602	659	Cs7g	2166	2246		1074	1118	Cc9g	1084	1123		1349	1381	Cg5g	2450	2489		735	949	Cm3g	803	1067		1349	1394	Ci8g	980	1054		1351	1388	Ab8g	1100	1171
	728	944	Cs3g	740	1003		1119	1346	Cc7g	1766	2316	Vv02g	2	597	Cg5g	3	1009	Vv03g	38	455	Cm8g	19	1044	Vv02g	13	630	Ci5g	1	1170	Vv02g	2	597	Ab5g	29	1004
Vv03g	3	472	Cs8g	2	853		1351	1381	Cc9g	1156	1192		704	949	Cg3g	787	1018		466	575	Cm5g	3351	4114		735	949	Ci3g	646	923		635	660	Ab7g	2171	2201
	466	575	Cs5g	2822	3459	Vv02g	2	597	Cc5g	2	962	Vv03g	3	858	Cg8g	4	895		579	900	Cm8g	211	714	Vv03g	1	458	Ci8g	2	1442		704	935	Ab3g	759	935
	576	858	Cs8g	219	614		598	740	Cc7g	857	954		1043	1128	Cg6g	1179	1232		1043	1116	Cm6g	1207	1235		525	575	Ci5g	3163	3208	Vv03g	1	468	Ab8g	1	914
Vv04g	7	195	Cs4g	466	1870		704	949	Cc3g	936	1207	Vv04g	7	677	Cg4g	1	690	Vv04g	7	176	Cm4g	491	2079		576	858	Ci8g	228	665		525	575	Ab5g	2656	2701
	198	274	Cs7g	627	691	Vv03g	3	858	Cc8g	1	902		766	812	Cg5g	2976	3051		241	272	Cm7g	721	744		1043	1129	Ci6g	1238	1294		576	899	Ab8g	205	675
	278	496	Cs4g	1655	1995		1079	1129	Cc6g	1098	1128		817	899	Cg6g	26	145		371	401	Cm4g	2156	2182	Vv04g	7	194	Ci4g	511	2080	Vv04g	35	195	Ab4g	396	2498
	439	677	Cs7g	393	623	Vv04g	7	677	Cc4g	2	2010		904	1314	Cg1g	61	2635		410	677	Cm7g	409	694		198	274	Ci7g	753	818		198	274	Ab7g	129	223
	765	812	Cs5g	2525	2599		765	812	Cc5g	2999	3064	Vv05g	28	1012	Cg9g	2	1570		817	893	Cm6g	294	415		278	366	Ci4g	1986	2064		278	423	Ab4g	2505	2630
	836	899	Cs6g	141	264		817	899	Cc6g	217	311		1099	1338	Cg5g	2611	2909		912	1305	Cm1g	268	3506		367	562	Ci7g	531	698		439	513	Ab7g	13	95
	904	1337	Cs1g	387	2659		882	1282	Cc1g	29	1881		1368	1426	Cg2g	1583	1677	Vv05g	28	768	Cm9g	9	1046		465	496	Ci4g	1827	1885		494	576	Ab1g	2229	2316
Vv05g	28	798	Cs9g	2	995	Vv05g	28	1102	Cc9g	2	1401	Vv06g	4	231	Cg2g	8	390		778	1440	Cm5g	1419	3036		512	623	Ci8g	1997	2085		577	623	Ab7g	75	128
	798	1408	Cs5g	2040	3549		1355	1436	Cc5g	1989	2145		232	827	Cg8g	1227	2481	Vv06g	5	72	Cm9g	219	288		618	671	Ci7g	707	749		765	798	Ab5g	2424	2483
Vv06g	4	78	Cs9g	189	259	Vv06g	4	231	Cc2g	3	473		856	1057	Cg2g	394	578		140	168	Cm5g	1726	1789		823	892	Ci6g	272	359		817	893	Ab6g	138	260
	175	231	Cs2g	2979	3054		232	709	Cc8g	1565	2040		1061	1284	Cg8g	1301	1978		170	230	Cm2g	3429	3518		902	1337	Ci1g	873	3679		904	1337	Ab1g	1000	3123
	232	709	Cs8g	1559	2046		711	799	Cc3g	501	554	Vv07g	2	892	Cg5g	3228	3974		232	823	Cm8g	1699	2369	Vv05g	1	781	Ci9g	58	1112	Vv05g	29	1012	Ab9g	171	1171
	856	1057	Cs2g	2875	3121		808	827	Cc8g	1231	1272		955	1417	Cg1g	543	2900		856	1077	Cm2g	3309	3623		1099	1338	Ci5g	2418	2784		1099	1372	Ab5g	2025	2384
	1061	1126	Cs8g	1482	1554		856	1057	Cc2g	478	645	Vv08g	2	86	Cg6g	845	1129		1061	1126	Cm8g	1623	1813	Vv06g	4	93	Ci9g	225	367		1406	1436	Ab1g	229	302
	1152	1191	Cs3g	686	725		1061	1287	Cc8g	1228	1561		95	128	Cg5g	3155	3178		1152	1203	Cm3g	710	748		134	231	Ci2g	2922	4004	Vv06g	4	100	Ab9g	5	105
	1231	1261	Cs8g	1399	1433	Vv07g	8	892	Cc5g	3219	3961		148	1085	Cg6g	112	1789		1216	1241	Cm8g	1547	1581		232	855	Ci8g	1307	2334		103	125	Ab1g	380	421
Vv07g	8	789	Cs5g	2888	3502		975	1417	Cc1g	405	2084		1168	1232	Cg9g	1625	1831	Vv07g	8	406	Cm5g	3638	4024		956	1018	Ci3g	1696	1742		159	230	Ab2g	33	138
	955	1417	Cs1g	74	2677	Vv08g	2	48	Cc6g	997	1037		1244	1329	Cg6g	1247	1348		484	609	Cm1g	437	562		1022	1057	Ci2g	3841	3913		232	709	Ab8g	1676	2200
Vv08g	2	48	Cs6g	962	1004		89	161	Cc5g	3133	3187		1383	1481	Cg9g	2001	2240		600	932	Cm5g	3382	3635		1061	1125	Ci8g	1500	1583		711	755	Ab2g	898	972
	55	86	Cs7g	1533	1568		148	1142	Cc6g	144	1641	Vv09g	6	712	Cg1g	918	2074		955	1416	Cm1g	290	3076		1167	1191	Ci3g	659	676		808	821	Ab8g	1408	1426
	88	161	Cs5g	2680	2736		1151	1256	Cc9g	1397	1536		918	954	Cg2g	2580	2610	Vv08g	2	48	Cm6g	1123	1220		1236	1284	Ci6g	1491	1549		947	1049	Ab2g	3335	3424
	148	1329	Cs6g	257	1659		1244	1329	Cc6g	1147	1239	Vv10g	1	718	Cg2g	3830	4497		56	86	Cm7g	1540	1563	Vv07g	473	609	Ci3g	921	1032		1061	1287	Ab8g	1405	1670
	1331	1371	Cs5g	2601	2669		1331	1371	Cc5g	3066	3125		735	861	Cg7g	1372	1436		88	161	Cm5g	3252	3307		955	1418	Ci1g	113	3572	Vv07g	2	892	Ab5g	2746	3435
	1419	1458	Cs9g	1168	1250		1382	1481	Cc9g	1539	1707		864	889	Cg2g	3638	3657		175	1329	Cm6g	20	2358	Vv08g	2	688	Ci6g	541	2237		1007	1417	Ab1g	70	2721
Vv09g	6	580	Cs1g	1173	1896	Vv09g	6	1027	Cc1g	795	1784	Vv11g	2	226	Cg4g	859	1934		1331	1371	Cm5g	3161	3231		666	732	Ci7g	1830	1878	Vv08g	2	48	Ab6g	877	916
Vv10g	1	690	Cs2g	224	1556	Vv10g	1	718	Cc2g	2354	3071		233	286	Cg5g	1655	1732		1382	1459	Cm9g	1255	1421		734	1329	Ci6g	6	1954		95	128	Ab5g	2595	2621
	735	861	Cs7g	1254	1317		735	861	Cc7g	1495	1556		327	367	Cg9g	1917	1962	Vv09g	6	1027	Cm1g	1646	2649		1331	1371	Ci5g	2890	2979		148	896	Ab6g	392	1844
	864	889	Cs2g	1150	1169		864	889	Cc2g	2153	2169		355	1091	Cg4g	691	2495	Vv10g	21	718	Cm2g	175	1072		1396	1455	Ci9g	1265	1406		714	779	Ab8g	384	471
Vv11g	2	1092	Cs4g	5	1988	Vv11g	1	1091	Cc4g	528	2462	Vv12g	85	124	Cg7g	1217	1264		734	861	Cm7g	1390	1433	Vv09g	6	583	Ci1g	1763	2708		900	1329	Ab6g	1166	1735
Vv12g	56	124	Cs7g	1637	1817	Vv12g	3	124	Cc7g	1111	1195		126	780	Cg2g	804	2073		864	889	Cm2g	1276	1296		480	506	Ci3g	1270	1293		1331	1367	Ab5g	2508	2573
	126	792	Cs2g	1442	2360		156	792	Cc2g	840	1711		947	1207	Cg3g	72	593	Vv11g	1	1092	Cm4g	18	1948		956	1027	Ci1g	1555	1602		1382	1455	Ab9g	1230	1334
	1001	1296	Cs3g	7	548		967	1296	Cc3g	5	496		1212	1274	Cg4g	487	627	Vv12g	56	129	Cm7g	1643	1783	Vv10g	1	637	Ci2g	188	1274	Vv09g	6	83	Ab4g	2655	2742
Vv13g	5	961	Cs7g	144	3228	Vv13g	16	868	Cc7g	1	2351	Vv13g	38	870	Cg7g	22	2264		126	792	Cm2g	1483	2625		735	861	Ci7g	1383	1622		95	1027	Ab1g	1244	2135
	1100	1148	Cs1g	1584	1616		869	959	Cc2g	113	176		1086	1151	Cg3g	647	705	Vv13g	16	976	Cm7g	115	3418		798	816	Ci2g	1359	1372	Vv10g	1	718	Ab2g	353	1375
	1186	1434	Cs7g	6	136		1086	1151	Cc3g	788	843		1203	1434	Cg7g	2265	2403		1101	1152	Cm1g	2217	2245	Vv11g	1	330	Ci4g	507	1975		735	861	Ab7g	995	1055
Vv14g	3	38	Cs6g	53	122		1186	1434	Cc7g	2359	2491	Vv14g	3	54	Cg5g	1297	1415		1203	1430	Cm7g	141	266		331	357	Ci7g	59	85	Vv11g	1	1092	Ab4g	1	2414
	69	492	Cs3g	1015	1518	Vv14g	25	59	Cc6g	5	72		69	355	Cg2g	3013	3284	Vv14g	69	491	Cm3g	1076	1637		357	382	Ci6g	452	554	Vv12g	85	124	Ab7g	1546	1581
	515	615	Cs8g	1201	1316		69	262	Cc3g	1517	1709		364	512	Cg3g	1026	1254		515	618	Cm8g	1349	1479		402	462	Ci5g	88	162		202	252	Ab4g	2744	2788
	730	985	Cs6g	1671	1937		220	284	Cc5g	3020	3034		515	618	Cg8g	990	1126		693	1003	Cm6g	2022	2403		466	1091	Ci4g	40	1887		290	792	Ab2g	2152	2823
	1134	1401	Cs2g	2366	2855		236	512	Cc3g	1226	1540		730	1003	Cg6g	1803	2056		1098	1401	Cm2g	1391	3259	Vv12g	3	124	Ci7g	1888	2048		981	1289	Ab3g	33	513
	1403	1625	Cs6g	1963	2168		552	651	Cc5g	2539	2592		1049	1401	Cg2g	601	1305		1428	1625	Cm6g	2447	2607		161	788	Ci2g	1961	3430	Vv13g	16	772	Ab7g	833	3159
Vv15g	1	126	Cs7g	1485	1532		730	985	Cc6g	1656	1935		1404	1625	Cg6g	2328	2571	Vv15g	1	202	Cm7g	1504	1582		1005	1274	Ci3g	206	543		786	817	Ab2g	999	1031
	160	367	Cs1g	171	273		1049	1401	Cc2g	662	1229	Vv15g	3	126	Cg6g	801	888		166	419	Cm1g	609	737	Vv13g	16	1354	Ci7g	162	3601		848	952	Ab7g	1879	1987
Vv16g	3	30	Cs5g	1641	1671		1403	1625	Cc6g	1961	2152		160	955	Cg5g	3961	4499		416	544	Cm3g	301	408	Vv14g	3	38	Ci6g	123	205		1086	1151	Ab1g	1886	1948
	35	122	Cs7g	1333	1503	Vv15g	15	126	Cc7g	1292	1341	Vv16g	3	197	Cg5g	2081	2991		577	637	Cm1g	392	454		69	501	Ci3g	1297	1799		1203	1434	Ab7g	862	992
	140	197	Cs5g	2462	2522		160	955	Cc5g	3951	4476		292	951	Cg9g	2257	2877		763	927	Cm9g	1099	1226		515	615	Ci8g	1136	1256	Vv14g	3	41	Ab6g	4	84
	278	939	Cs9g	1290	1897	Vv16g	3	44	Cc5g	1508	1609		959	1073	Cg5g	1818	2016	Vv16g	6	30	Cm5g	2188	2208		670	1003	Ci6g	2057	2552		71	670	Ab3g	201	1684
	940	989	Cs5g	1533	1576		9	122	Cc7g	1322	1416	Vv17g	2	123	Cg7g	1005	1154		9	120	Cm7g	1443	1493		1049	1401	Ci2g	1814	3738		730	1003	Ab6g	1858	2163
Vv17g	2	64	Cs7g	1876	1940		128	197	Cc5g	2936	3012		124	171	Cg5g	651	694		128	172	Cm5g	3045	3086		1421	1625	Ci6g	2219	2711		1049	1455	Ab2g	1644	3275
	124	171	Cs5g	602	645		292	939	Cc9g	1717	2246		188	290	Cg4g	1083	1195		292	939	Cm9g	1339	1933	Vv15g	1	51	Ci7g	1780	1798		1421	1625	Ab6g	2182	2374
	305	443	Cs7g	2528	2677		959	1073	Cc5g	1318	1467		291	990	Cg5g	306	2278		1005	1073	Cm5g	54	136		160	573	Ci1g	401	653	Vv15g	15	51	Ab7g	1512	1534
	443	935	Cs5g	299	1163	Vv17g	1	123	Cc7g	944	1054	Vv18g	1	1599	Cg3g	1262	2617	Vv17g	1	115	Cm7g	1868	2294		577	747	Ci3g	1022	1160		160	384	Ab1g	308	471
Vv18g	38	1709	Cs3g	1532	2794		124	171	Cc5g	600	641		1804	1870	Cg5g	2505	2548		124	321	Cm5g	641	1335		753	954	Ci1g	247	397		390	955	Ab4g	629	1007
	1806	2002	Cs5g	1696	1874		194	290	Cc4g	990	1090		1904	1982	Cg4g	1543	1663		323	431	Cm7g	2688	2794	Vv16g	6	26	Ci5g	1860	1876	Vv16g	3	30	Ab5g	1626	1649
Vv19g	6	115	Cs5g	1166	1337		291	994	Cc5g	295	2538	Vv19g	2	79	Cg5g	1527	1579		435	935	Cm5g	306	1949		57	109	Ci2g	3783	3817		35	120	Ab7g	1275	1371
	155	324	Cs1g	519	742	Vv18g	1	1709	Cc3g	1720	2983		88	126	Cg7g	772	896	Vv18g	25	1708	Cm3g	1520	3096		133	197	Ci5g	2787	2856		123	197	Ab5g	2386	2447
	365	800	Cs4g	663	1156		1904	2006	Cc5g	1783	1915		129	230	Cg4g	947	1077		1921	2006	Cm5g	2290	2419		351	904	Ci9g	1495	2045		292	890	Ab9g	1346	1854
	873	1012	Cs5g	1408	1532	Vv19g	6	126	Cc5g	2268	2461		233	510	Cg2g	2085	2497	Vv19g	32	115	Cm5g	1268	1620	Vv17g	1	68	Ci7g	2097	2223		1002	1024	Ab7g	2095	2128
	1040	1124	Cs4g	1179	1212		129	798	Cc4g	1097	1828		510	778	Cg4g	1209	1720		147	382	Cm1g	968	1286		124	169	Ci5g	733	774	Vv17g	1	92	Ab7g	1649	2419
							848	1012	Cc5g	1268	2262		957	1012	Cg5g	1750	1791		383	800	Cm4g	749	1273		329	382	Ci7g	2192	2988		124	171	Ab5g	625	664
							1012	1196	Cc9g	2247	2344		1012	1196	Cg9g	2869	2970		969	1012	Cm5g	1965	2015		484	1007	Ci5g	287	1825		164	227	Ab4g	1778	1874
																			1084	1162	Cm4g	1268	1300	Vv18g	4	1599	Ci3g	1812	3303		252	499	Ab7g	2327	2594
																									1809	2006	Ci5g	1848	2174		481	935	Ab5g	311	1149
																								Vv19g	6	88	Ci5g	1473	1553		945	994	Ab1g	2350	2404
																									151	310	Ci1g	974	1222	Vv18g	1	1709	Ab3g	942	2860
																									382	798	Ci4g	692	1302		1909	1982	Ab5g	1878	1913
																									1109	1196	Ci2g	413	490	Vv19g	6	126	Ab5g	1159	1311
																															129	147	Ab7g	2371	2396
																															171	289	Ab1g	733	875
																															394	800	Ab4g	1046	1501
																															848	1012	Ab5g	1368	1513
																															1012	1196	Ab4g	1548	1649

## Sheet: Table S7
Supplementary Tables 7. Multiple genome alignment table of 6 Rutaceae plants
Collinear Genes 1						Collinear Genes 2						Collinear Genes 3
Cs1g01010	.	.	Ci1g156320	.	Ab1g23364	Cs3g18650	Cc3g02016	Cx3g015430	Ci3g122370	Cm3g020940	Ab3g21852	.	.	.	.	.	.
Cs1g01015	.	.	.	.	.	.	.	.	.	.	.	.	.	.	.	.	.
Cs1g01020	.	.	.	.	Ab1g23360	.	.	.	.	.	.	.	.	.	.	.	.
Cs1g01030	.	.	Ci1g156340	.	.	.	.	.	.	.	.	.	.	.	.	.	.
Cs1g01040	.	.	.	.	Ab1g23367	.	.	.	.	.	.	.	.	.	.	.	.
Cs1g01050	.	.	Ci1g156350	.	.	.	.	.	.	.	.	.	.	.	.	.	.
Cs1g01060	.	.	Ci1g156360	.	Ab1g23425	.	.	.	.	.	.	.	.	.	.	.	.
Cs1g01070	.	.	Ci1g156370	.	Ab1g23442	.	.	.	.	.	.	.	.	.	.	.	.
Cs1g01080	.	.	Ci1g156390	.	Ab1g23391	.	.	.	.	.	.	.	.	.	.	.	.
Cs1g01090	.	.	Ci1g156400	.	Ab1g23358	.	.	.	.	.	.	.	.	.	.	.	.
Cs1g01100	.	.	.	.	.	.	.	.	.	.	.	.	.	.	.	.	.
Cs1g01110	.	.	.	Cm1g153100	.	.	.	.	.	.	.	.	.	.	.	.	.
Cs1g01120	.	.	.	.	.	.	.	.	.	.	.	.	.	.	.	.	.
Cs1g01130	.	.	.	.	Ab1g23390	.	.	.	.	.	.	.	.	.	.	.	.
Cs1g01140	.	.	.	Cm1g206740	Ab1g23374	.	.	.	.	.	.	.	.	.	.	.	.
Cs1g01150	.	Cx1g029040	.	.	Ab1g23379	.	.	.	.	.	.	.	.	.	.	.	.
Cs1g01160	.	.	.	Cm1g206750	.	.	.	.	.	.	.	.	.	.	.	.	.
Cs1g01165	.	.	.	.	.	.	.	.	.	.	.	.	.	.	.	.	.
Cs1g01170	.	.	.	.	.	.	.	.	.	.	.	.	.	.	.	.	.
Cs1g01180	.	.	.	.	.	.	.	.	.	.	.	.	.	.	.	.	.
Cs1g01190	Cc1g02086	Cx1g029060	.	Cm1g206770	Ab1g23375	Cs3g18610	Cc3g02012	Cx3g015390	Ci3g122400	Cm3g020890	Ab3g21751	.	.	.	.	.	.
Cs1g01200	Cc1g02087	.	.	Cm1g206780	Ab1g23417	.	.	.	.	.	.	.	.	.	.	.	.
Cs1g01205	.	.	.	.	.	.	.	.	.	.	.	.	.	.	.	.	.
Cs1g01210	Cc1g02088	Cx1g029070	.	Cm3g020880	Ab1g23412	Cs3g18600	.	Cx3g015380	Ci3g122410	.	.	.	.	.	.	.	.
Cs1g01220	Cc1g02089	Cx1g029080	.	Cm1g181100	Ab1g23440	Cs3g18560	Cc3g02011	Cx3g015320	.	Cm3g020880	Ab3g21767	.	.	.	.	.	.
Cs1g01230	.	.	.	.	.	.	.	.	.	.	.	.	.	.	.	.	.
Cs1g01240	Cc1g02090	Cx3g015310	.	Cm3g020870	Ab1g23421	Cs3g18550	Cc3g02010	Cx3g015310	Ci3g122420	Cm3g020870	Ab3g21734	.	.	.	.	.	.
Cs1g01250	Cc1g02091	Cx1g029150	.	Cm1g181160	.	.	.	.	.	.	.	.	.	.	.	.	.
Cs1g01260	Cc1g02093	Cx1g029160	.	Cm1g181170	Ab1g23399	Cs3g18540	Cc3g02009	Cx3g015300	Ci3g122430	Cm3g020860	Ab3g21740	.	.	.	.	.	.
Cs1g01270	Cc1g02094	Cx1g029170	.	Cm1g181180	Ab1g23426	.	.	.	.	.	.	.	.	.	.	.	.
Cs1g01280	Cc1g02096	Cx1g029190	.	Cm1g181200	Ab1g23393	.	.	.	.	.	.	.	.	.	.	.	.
Cs1g01290	Cc1g02097	Cx1g029200	.	Cm1g181210	Ab1g23446	.	.	.	.	.	.	.	.	.	.	.	.
Cs1g01300	.	.	.	.	.	.	.	.	.	.	.	.	.	.	.	.	.
Cs1g01310	Cc1g02098	Cx1g029210	.	Cm1g181220	Ab1g23435	.	.	.	.	.	.	.	.	.	.	.	.
Cs1g01320	Cc1g02099	Cx1g029220	.	Cm1g181230	Ab1g23357	Cs3g18470	Cc3g02004	Cx3g015210	Ci3g081310	Cm3g020700	Ab3g21713	.	.	.	.	.	.
Cs1g01330	Cc1g02100	Cx1g029240	Ci3g081330	Cm1g181250	Ab1g23361	Cs3g18450	Cc3g02002	.	Ci3g081330	Cm3g020680	Ab3g21723	.	.	.	.	.	.
Cs1g01340	Cc1g02101	Cx1g029250	.	Cm1g181260	Ab1g23411	.	.	.	.	.	.	.	.	.	.	.	.
Cs1g01350	.	.	Ci1g156800	.	.	.	.	.	.	.	.	.	.	.	.	.	.
Cs1g01360	.	Cx1g029280	.	.	.	.	.	.	.	.	.	.	.	.	.	.	.
Cs1g01370	Cc1g02102	Cx1g029290	.	Cm1g181280	Ab1g23437	.	.	.	.	.	.	.	.	.	.	.	.
Cs1g01380	Cc1g02103	Cx1g029300	Ci1g289690	Cm1g181290	Ab1g23409	Cs3g18420	Cc3g01998	Cx3g015160	Ci3g081370	Cm3g020650	Ab3g21801	.	.	.	.	.	.
Cs1g01390	Cc1g02104	Cx1g029310	Ci1g289700	Cm1g181300	Ab1g23422	.	.	.	.	.	.	.	.	.	.	.	.
Cs1g01400	Cc1g02105	Cx1g029320	Ci1g289730	Cm1g181310	Ab1g23388	.	.	.	.	.	.	.	.	.	.	.	.
Cs1g01410	Cc1g02106	Cx3g015150	Ci3g081380	Cm3g020640	Ab1g23414	Cs3g18410	Cc3g01997	Cx3g015150	Ci3g081380	Cm3g020640	Ab3g21792	.	.	.	.	.	.
Cs1g01420	Cc1g02108	Cx1g029330	.	Cm1g181330	Ab1g23383	.	.	.	.	.	.	.	.	.	.	.	.
Cs1g01430	Cc1g02109	Cx3g015130	Ci3g081390	Cm1g181340	Ab1g23405	.	.	.	.	.	.	.	.	.	.	.	.
Cs1g01440	Cc1g02110	Cx1g029350	.	Cm3g020620	Ab1g23383	Cs3g18400	Cc3g01996	Cx3g015130	Ci3g081390	Cm3g020620	Ab3g21807	.	.	.	.	.	.
Cs1g01450	.	.	.	.	.	.	.	.	.	.	.	.	.	.	.	.	.
Cs1g01460	Cc1g02111	Cx1g029370	.	.	Ab1g23434	.	.	.	.	.	.	.	.	.	.	.	.
Cs1g01470	.	Cx1g029390	.	.	Ab1g23401	.	.	.	.	.	.	.	.	.	.	.	.
Cs1g01480	Cc1g02112	Cx1g029400	.	Cm1g215950	Ab1g23403	.	.	.	.	.	.	.	.	.	.	.	.
Cs1g01490	Cc1g02113	Cx1g029410	.	Cm1g215960	Ab1g23444	.	.	.	.	.	.	.	.	.	.	.	.
Cs1g01500	Cc1g02114	Cx1g029420	.	.	Ab1g23389	.	.	.	.	.	.	.	.	.	.	.	.
Cs1g01505	.	.	.	.	Ab1g23366	.	.	.	.	.	.	.	.	.	.	.	.
Cs1g01510	Cc1g02115	Cx1g029430	.	.	.	.	.	.	.	.	.	.	.	.	.	.	.
Cs1g01520	Cc1g02116	Cx1g029440	.	.	Ab1g23382	.	.	.	.	.	.	.	.	.	.	.	.
Cs1g01530	Cc1g02117	Cx1g029450	Ci3g081410	Cm3g020600	Ab1g23371	Cs3g18380	Cc3g01994	Cx3g015110	Ci3g081410	Cm3g020600	Ab3g21759	.	.	.	.	.	.
Cs1g01540	.	Cx1g029460	.	Cm3g020580	.	Cs3g18360	Cc3g01992	Cx3g015090	.	Cm3g020580	Ab3g21783	.	.	.	.	.	.
Cs1g01550	Cc1g02119	Cx1g029470	.	.	Ab1g23392	.	.	.	.	.	.	.	.	.	.	.	.
Cs1g01560	Cc1g02120	Cx1g029480	.	Cm1g288400	Ab1g23398	.	.	.	.	.	.	.	.	.	.	.	.
Cs1g01570	Cc1g02121	Cx1g029490	.	.	Ab1g23402	.	.	.	.	.	.	.	.	.	.	.	.
Cs1g01580	Cc1g02122	.	.	.	.	.	.	.	.	.	.	.	.	.	.	.	.
Cs1g01590	Cc1g02123	Cx1g029540	.	.	Ab1g23377	.	.	.	.	.	.	.	.	.	.	.	.
Cs1g01600	Cc1g02124	Cx1g029550	.	.	Ab1g23443	.	.	.	.	.	.	.	.	.	.	.	.
Cs1g01610	Cc1g02125	Cx1g029560	.	.	Ab1g23387	.	.	.	.	.	.	.	.	.	.	.	.
Cs1g01620	Cc1g02126	Cx3g015000	Ci3g081500	Cm3g020520	Ab1g23436	Cs3g18290	Cc3g01985	Cx3g015000	.	Cm3g020520	Ab3g21752	.	.	.	.	.	.
Cs1g01630	.	.	.	.	.	.	.	.	.	.	.	.	.	.	.	.	.
Cs1g01640	Cc1g02128	Cx1g029580	.	.	Ab1g23363	.	.	.	.	.	.	.	.	.	.	.	.
Cs1g01650	Cc1g02129	Cx1g029590	.	.	Ab1g23370	.	.	.	.	.	.	.	.	.	.	.	.
Cs1g01660	Cc1g02130	Cx1g029600	.	.	Ab1g23427	.	.	.	.	.	.	.	.	.	.	.	.
Cs1g01670	.	.	.	.	.	.	.	.	.	.	.	.	.	.	.	.	.
Cs1g01680	.	Cx1g029620	.	.	Ab1g23413	.	.	.	.	.	.	.	.	.	.	.	.
Cs1g01690	Cc1g02132	Cx1g029630	.	.	Ab1g23390	.	.	.	.	.	.	.	.	.	.	.	.
Cs1g01700	.	.	Ci1g161030	.	Ab1g23431	.	.	.	.	.	.	.	.	.	.	.	.
Cs1g01710	.	.	.	.	.	.	.	.	.	.	.	.	.	.	.	.	.
Cs1g01720	.	.	.	.	.	.	.	.	.	.	.	.	.	.	.	.	.
Cs1g01730	Cc3g02016	Cx3g015430	Ci1g161060	.	Ab1g23423	Cs3g18650	Cc3g02016	Cx3g015430	Ci3g122370	Cm3g020940	Ab3g21852	.	.	.	.	.	.
Cs1g01740	.	.	Ci1g161070	.	.	.	.	.	.	.	.	.	.	.	.	.	.
Cs1g01750	.	.	Ci1g161080	.	Ab1g23404	.	.	.	.	.	.	.	.	.	.	.	.
Cs1g01760	.	.	Ci1g161090	.	Ab1g23394	.	.	.	.	.	.	.	.	.	.	.	.
Cs1g01770	.	.	Ci1g161100	.	Ab1g23429	.	.	.	.	.	.	.	.	.	.	.	.
Cs1g01780	.	.	.	.	.	.	.	.	.	.	.	.	.	.	.	.	.
Cs1g01790	.	.	Ci1g161120	.	Ab1g23432	.	.	.	.	.	.	.	.	.	.	.	.
Cs1g01800	.	.	.	.	Ab1g23407	.	.	.	.	.	.	.	.	.	.	.	.
Cs1g01805	.	.	.	.	.	.	.	.	.	.	.	.	.	.	.	.	.
Cs1g01810	.	.	.	.	.	.	.	.	.	.	.	.	.	.	.	.	.
Cs1g01820	.	.	Ci1g161180	.	Ab1g23420	.	.	.	.	.	.	.	.	.	.	.	.
Cs1g01830	Cc3g02020	Cx3g015460	Ci1g161190	.	Ab1g23430	Cs3g18680	Cc3g02020	Cx3g015460	Ci3g122340	Cm3g020970	Ab3g21864	.	.	.	.	.	.
Cs1g01840	.	.	.	.	Ab1g23438	.	.	.	.	.	.	.	.	.	.	.	.
Cs1g01850	.	.	Ci1g161210	.	Ab1g23416	.	.	.	.	.	.	.	.	.	.	.	.
Cs1g01860	Cc3g02021	Cx3g015470	Ci1g161220	.	Ab1g23419	Cs3g18690	Cc3g02021	Cx3g015470	Ci3g122320	Cm3g020980	.	.	.	.	.	.	.
Cs1g01870	.	Cx3g014700	Ci1g161270	.	.	Cs3g17990	Cc3g01952	Cx3g014700	Ci3g081830	Cm3g099210	Ab3g21776	.	.	.	.	.	.
Cs1g01880	.	.	.	.	.	.	.	.	.	.	.	.	.	.	.	.	.
Cs1g01890	.	.	.	.	.	.	.	.	.	.	.	.	.	.	.	.	.
Cs1g01900	.	.	.	.	Ab1g23373	.	.	.	.	.	.	.	.	.	.	.	.
Cs1g01910	Cc3g02022	Cx3g015480	Ci1g161290	.	Ab1g27874	Cs3g18700	Cc3g02022	Cx3g015480	Ci3g122310	Cm3g020990	Ab3g21857	.	.	.	.	.	.
Cs1g01920	.	.	Ci1g161300	Cm1g218000	Ab1g27870	.	.	.	.	.	.	.	.	.	.	.	.
Cs1g01930	.	.	Ci1g161310	.	Ab1g27884	.	.	.	.	.	.	.	.	.	.	.	.
Cs1g01940	.	.	Ci1g161320	.	Ab1g27866	.	.	.	.	.	.	.	.	.	.	.	.
Cs1g01950	.	.	Ci1g161330	.	Ab1g27864	.	.	.	.	.	.	.	.	.	.	.	.
Cs1g01960	.	.	Ci1g161340	.	Ab1g27868	.	.	.	.	.	.	.	.	.	.	.	.
Cs1g01970	.	.	Ci1g161350	.	Ab1g27867	.	.	.	.	.	.	.	.	.	.	.	.
Cs1g01980	.	.	Ci1g161360	.	Ab1g27882	.	.	.	.	.	.	.	.	.	.	.	.
Cs1g01990	.	.	Ci1g161380	.	Ab1g27886	.	.	.	.	.	.	.	.	.	.	.	.
Cs1g02000	.	.	Ci1g161390	.	Ab1g27862	.	.	.	.	.	.	.	.	.	.	.	.
Cs1g02010	.	.	Ci1g161400	.	Ab1g27875	.	.	.	.	.	.	.	.	.	.	.	.
Cs1g02020	.	.	.	.	.	.	.	.	.	.	.	.	.	.	.	.	.
Cs1g02030	.	.	.	.	.	.	.	.	.	.	.	.	.	.	.	.	.
Cs1g02040	.	.	Ci1g161430	Cm1g233650	Ab1g27878	.	.	.	.	.	.	.	.	.	.	.	.
Cs1g02050	.	.	Ci1g161440	Cm1g266420	Ab1g27865	.	.	.	.	.	.	.	.	.	.	.	.
Cs1g02060	.	.	.	.	.	.	.	.	.	.	.	.	.	.	.	.	.
Cs1g02065	.	.	.	.	.	.	.	.	.	.	.	.	.	.	.	.	.
Cs1g02070	.	.	.	.	.	.	.	.	.	.	.	.	.	.	.	.	.
Cs1g02080	.	.	Ci1g167670	.	.	.	.	.	.	.	.	.	.	.	.	.	.
Cs1g02090	.	.	.	.	.	.	.	.	.	.	.	.	.	.	.	.	.
Cs1g02100	.	.	.	.	.	.	.	.	.	.	.	.	.	.	.	.	.
Cs1g02110	.	.	.	.	.	.	.	.	.	.	.	.	.	.	.	.	.
Cs1g02120	.	.	.	Cm1g266430	.	.	.	.	.	.	.	.	.	.	.	.	.
Cs1g02130	.	.	Ci1g167690	.	.	.	.	.	.	.	.	.	.	.	.	.	.
Cs1g02140	.	.	.	.	.	.	.	.	.	.	.	.	.	.	.	.	.
Cs1g02150	.	.	Ci1g167740	.	.	.	.	.	.	.	.	.	.	.	.	.	.
Cs1g02160	.	.	.	.	.	.	.	.	.	.	.	.	.	.	.	.	.
Cs1g02170	.	.	.	Cm1g101050	.	.	.	.	.	.	.	.	.	.	.	.	.
Cs1g02180	.	.	.	.	.	.	.	.	.	.	.	.	.	.	.	.	.
Cs1g02190	.	.	.	Cm1g149370	.	.	.	.	.	.	.	.	.	.	.	.	.
Cs1g02195	.	.	.	.	.	.	.	.	.	.	.	.	.	.	.	.	.
Cs1g02200	.	.	.	.	.	.	.	.	.	.	.	.	.	.	.	.	.
Cs1g02210	.	.	.	.	.	.	.	.	.	.	.	.	.	.	.	.	.
Cs1g02220	.	.	.	.	.	.	.	.	.	.	.	.	.	.	.	.	.
Cs1g02230	.	.	.	.	.	.	.	.	.	.	.	.	.	.	.	.	.
Cs1g02240	.	.	.	.	.	.	.	.	.	.	.	.	.	.	.	.	.
Cs1g02250	.	.	.	.	.	.	.	.	.	.	.	.	.	.	.	.	.
Cs1g02260	.	.	.	.	.	.	.	.	.	.	.	.	.	.	.	.	.
Cs1g02270	.	.	.	.	.	.	.	.	.	.	.	.	.	.	.	.	.
Cs1g02280	.	.	.	.	.	.	.	.	.	.	.	.	.	.	.	.	.
Cs1g02290	.	.	.	Cm1g100980	Ab1g27885	.	.	.	.	.	.	.	.	.	.	.	.
Cs1g02295	.	.	.	Cm1g100970	Ab1g27879	.	.	.	.	.	.	.	.	.	.	.	.
Cs1g02300	.	.	.	.	Ab1g27877	.	.	.	.	.	.	.	.	.	.	.	.
Cs1g02310	Cc3g02042	Cx3g015650	.	Cm1g100960	Ab1g27872	Cs3g18870	Cc3g02042	Cx3g015650	Ci3g190970	Cm3g021200	Ab3g35471	.	.	.	.	.	.
Cs1g02320	.	.	.	Cm1g100950	Ab1g27861	.	.	.	.	.	.	.	.	.	.	.	.
Cs1g02330	.	.	.	.	.	.	.	.	.	.	.	.	.	.	.	.	.
Cs1g02340	.	.	.	.	.	.	.	.	.	.	.	.	.	.	.	.	.
Cs1g02350	.	.	.	Cm1g100930	Ab1g28706	.	.	.	.	.	.	.	.	.	.	.	.
Cs1g02360	.	.	.	Cm1g100920	Ab1g28671	.	.	.	.	.	.	.	.	.	.	.	.
Cs1g02370	.	.	.	Cm1g100910	Ab1g28685	.	.	.	.	.	.	.	.	.	.	.	.
Cs1g02380	Cc1g02024	Cx1g028250	Ci1g242830	Cm1g100900	Ab1g28747	.	.	.	.	.	.	.	.	.	.	.	.
Cs1g02390	Cc1g02025	Cx1g028260	.	Cm1g100890	.	.	.	.	.	.	.	.	.	.	.	.	.
Cs1g02400	.	.	.	.	.	.	.	.	.	.	.	.	.	.	.	.	.
Cs1g02410	.	.	.	.	.	.	.	.	.	.	.	.	.	.	.	.	.
Cs1g02420	Cc1g02026	Cx1g028270	Ci1g242820	Cm1g100880	Ab1g28739	.	.	.	.	.	.	.	.	.	.	.	.
Cs1g02430	Cc1g02027	Cx1g028300	.	Cm1g100850	Ab1g28664	.	.	.	.	.	.	.	.	.	.	.	.
Cs1g02440	Cc1g02028	Cx1g028310	Ci1g242790	Cm1g100840	.	.	.	.	.	.	.	.	.	.	.	.	.
Cs1g02450	.	Cx1g028330	.	.	Ab1g28725	.	.	.	.	.	.	.	.	.	.	.	.
Cs1g02460	Cc1g02029	.	.	.	Ab1g28674	.	.	.	.	.	.	.	.	.	.	.	.
Cs1g02470	Cc1g02030	Cx1g028340	Ci1g239490	Cm1g100810	Ab1g28721	.	.	.	.	.	.	.	.	.	.	.	.
Cs1g02480	Cc1g02031	Cx1g028350	Ci1g242780	Cm1g100780	.	.	.	.	.	.	.	.	.	.	.	.	.
Cs1g02490	.	.	.	.	.	.	.	.	.	.	.	.	.	.	.	.	.
Cs1g02500	.	.	.	.	.	.	.	.	.	.	.	.	.	.	.	.	.
Cs1g02510	Cc1g02032	Cx1g028360	Ci1g242770	Cm1g100770	Ab1g28709	.	.	.	.	.	.	.	.	.	.	.	.
Cs1g02520	.	.	Ci1g242760	Cm1g100760	Ab1g28666	.	.	.	.	.	.	.	.	.	.	.	.
Cs1g02530	.	.	.	.	.	.	.	.	.	.	.	.	.	.	.	.	.
Cs1g02540	.	.	.	.	.	.	.	.	.	.	.	.	.	.	.	.	.
Cs1g02550	.	.	.	.	.	.	.	.	.	.	.	.	.	.	.	.	.
Cs1g02560	.	.	Ci1g242710	.	.	Cs9g14500	.	.	.	.	.	.	.	.	.	.	.
Cs1g02570	.	.	.	.	.	.	.	.	.	.	.	.	.	.	.	.	.
Cs1g02580	Cc5g04480	Cx5g045050	Ci1g004160	Cm1g175010	.	.	.	.	.	.	.	.	.	.	.	.	.
Cs1g02590	.	.	.	.	.	.	.	.	.	.	.	.	.	.	.	.	.
Cs1g02600	Cc5g04478	Cx5g045020	Ci1g004150	Cm1g175030	.	.	.	.	.	.	.	.	.	.	.	.	.
Cs1g02610	.	Cx5g045010	.	.	.	.	.	.	.	.	.	.	.	.	.	.	.
Cs1g02620	Cc5g04477	.	Ci1g004140	Cm1g175050	.	.	.	.	.	.	.	.	.	.	.	.	.
Cs1g02630	Cc5g04476	Cx5g044990	Ci1g004110	Cm1g175060	.	.	.	.	.	.	.	.	.	.	.	.	.
Cs1g02640	Cc5g04475	.	.	Cm1g175070	.	.	.	.	.	.	.	.	.	.	.	.	.
Cs1g02650	Cc5g04474	Cx5g044980	Ci1g004100	Cm1g175080	.	.	.	.	.	.	.	.	.	.	.	.	.
Cs1g02660	Cc5g04473	Cx5g044970	Ci1g004090	Cm1g175090	.	Cs7g16200	.	.	.	.	.	.	.	.	.	.	.
Cs1g02670	.	.	.	.	.	.	.	.	.	.	.	.	.	.	.	.	.
Cs1g02675	.	.	.	.	.	.	.	.	.	.	.	.	.	.	.	.	.
Cs1g02680	.	.	.	.	.	.	.	.	.	.	.	.	.	.	.	.	.
Cs1g02690	.	.	.	.	.	.	.	.	.	.	.	.	.	.	.	.	.
Cs1g02700	Cc5g04468	Cx5g044920	Ci1g004040	.	.	.	.	.	.	.	.	.	.	.	.	.	.
Cs1g02710	.	.	.	.	.	.	.	.	.	.	.	.	.	.	.	.	.
Cs1g02720	Cc5g04465	.	Ci1g004010	.	.	.	.	.	.	.	.	.	.	.	.	.	.
Cs1g02730	Cc5g04464	Cx5g044880	Ci1g004000	.	.	.	.	.	.	.	.	.	.	.	.	.	.
Cs1g02740	Cc5g04463	Cx5g044870	Ci1g003980	.	.	.	.	.	.	.	.	.	.	.	.	.	.
Cs1g02750	Cc5g04462	Cx5g044860	Ci1g003970	.	Ab1g24115	.	.	.	.	.	.	.	.	.	.	.	.
Cs1g02760	Cc5g04461	Cx5g044850	Ci1g003960	.	Ab1g24154	.	.	.	.	.	.	.	.	.	.	.	.
Cs1g02770	Cc5g04459	Cx5g044840	Ci1g003950	.	.	Cs9g14250	Cc9g01902	.	Ci9g170100	.	Ab9g25555	.	.	.	.	.	.
Cs1g02780	.	.	Ci1g003940	.	.	.	.	.	.	.	.	.	.	.	.	.	.
Cs1g02790	Cc5g04458	Cx5g044830	.	.	.	.	.	.	.	.	.	.	.	.	.	.	.
Cs1g02800	Cc5g04456	Cx5g044810	Ci1g003930	.	.	.	.	.	.	.	.	.	.	.	.	.	.
Cs1g02810	Cc5g04455	Cx5g044800	Ci1g003920	.	.	.	.	.	.	.	.	.	.	.	.	.	.
Cs1g02820	Cc5g04454	Cx5g044790	Ci1g003910	.	.	.	.	.	.	.	.	.	.	.	.	.	.
Cs1g02830	Cc5g04453	Cx5g044780	Ci1g003900	.	.	.	.	.	.	.	.	.	.	.	.	.	.
Cs1g02840	Cc5g04452	Cx5g044760	Ci1g003880	.	.	.	.	.	.	.	.	.	.	.	.	.	.
Cs1g02850	Cc5g04451	Cx5g044750	Ci1g003870	.	.	.	.	.	.	.	.	.	.	.	.	.	.
Cs1g02860	Cc5g04449	Cx5g044740	Ci1g003860	Cm1g159540	.	.	.	.	.	.	.	.	.	.	.	.	.
Cs1g02870	Cc5g04448	Cx5g044730	Ci1g003850	Cm1g159550	.	.	.	.	.	.	.	.	.	.	.	.	.
Cs1g02880	Cc5g04447	Cx5g044720	Ci1g003840	.	.	.	.	.	.	.	.	.	.	.	.	.	.
Cs1g02890	Cc5g04446	Cx5g044710	Ci1g003830	.	.	.	.	.	.	.	.	.	.	.	.	.	.
Cs1g02900	Cc5g04445	Cx5g044680	Ci1g003810	.	.	.	.	.	.	.	.	.	.	.	.	.	.
Cs1g02910	.	.	.	.	.	.	.	.	.	.	.	.	.	.	.	.	.
Cs1g02920	.	.	.	.	.	.	.	.	.	.	.	.	.	.	.	.	.
Cs1g02930	Cc5g04442	Cx5g044650	Ci1g003770	.	Ab1g18780	.	.	.	.	.	.	.	.	.	.	.	.
Cs1g02940	Cc5g04441	.	Ci1g003760	.	Ab1g18779	.	.	.	.	.	.	.	.	.	.	.	.
Cs1g02950	.	Cx5g044640	Ci1g003750	.	Ab1g18780	.	.	.	.	.	.	.	.	.	.	.	.
Cs1g02960	Cc5g04440	.	.	Cm5g056490	Ab1g18786	Cs5g07610	Cc5g00659	Cx5g007160	Ci5g203950	.	.	.	.	.	.	.	.
Cs1g02970	Cc5g04439	Cx5g044630	Ci1g003730	.	Ab1g18772	.	.	.	.	.	.	.	.	.	.	.	.
Cs1g02980	Cc5g04438	Cx5g044620	Ci1g003720	Cm5g056500	Ab1g18765	Cs5g07620	Cc5g00660	Cx5g007170	Ci5g203940	Cm5g056500	Ab5g10938	.	.	.	.	.	.
Cs1g02990	.	.	.	.	.	.	.	.	.	.	.	.	.	.	.	.	.
Cs1g03000	Cc5g04436	Cx5g044600	Ci1g003700	.	Ab1g18783	.	.	.	.	.	.	.	.	.	.	.	.
Cs1g03010	Cc5g04435	Cx5g044590	Ci1g003690	.	Ab1g18788	.	.	.	.	.	.	.	.	.	.	.	.
Cs1g03020	Cc5g04434	.	Ci1g003680	.	Ab1g18760	.	.	.	.	.	.	.	.	.	.	.	.
Cs1g03030	Cc5g04433	Cx5g044580	Ci1g003670	Cm1g305110	Ab1g18778	.	.	.	.	.	.	.	.	.	.	.	.
Cs1g03040	Cc5g04432	Cx5g044570	Ci1g003660	Cm5g056620	Ab1g18758	Cs5g07730	Cc5g04432	Cx5g044570	Ci1g003660	.	Ab5g10773	.	.	.	.	.	.
Cs1g03050	Cc5g04431	Cx5g044560	Ci1g003650	.	Ab1g18762	.	.	.	.	.	.	.	.	.	.	.	.
Cs1g03060	Cc5g04430	Cx5g044550	Ci1g003640	Cm5g056640	Ab1g18784	Cs5g07760	Cc5g00671	Cx5g007300	Ci5g203750	Cm5g056640	Ab5g10858	.	.	.	.	.	.
Cs1g03070	Cc5g04429	Cx5g044540	Ci1g003630	.	Ab1g18764	Cs9g13780	Cc9g01720	Cx9g022620	.	.	Ab9g29725	.	.	.	.	.	.
Cs1g03080	Cc5g04428	Cx5g044530	Ci1g003620	.	Ab1g18777	.	.	.	.	.	.	.	.	.	.	.	.
Cs1g03090	Cc5g04427	Cx5g044520	Ci1g003610	.	Ab1g18767	.	.	.	.	.	.	.	.	.	.	.	.
Cs1g03100	Cc5g04426	Cx5g044510	Ci1g003600	.	Ab1g18763	.	.	.	.	.	.	.	.	.	.	.	.
Cs1g03110	.	Cx5g044500	Ci1g003590	.	Ab1g18771	.	.	.	.	.	.	.	.	.	.	.	.
Cs1g03120	Cc5g04425	.	.	.	Ab1g18787	Cs7g16140	.	Cx6g008490	Ci7g169690	.	Ab7g12686	.	.	.	.	.	.
Cs1g03130	Cc5g04424	Cx5g044490	Ci1g003580	.	Ab1g18775	.	.	.	.	.	.	.	.	.	.	.	.
Cs1g03140	Cc5g04423	Cx5g044480	Ci1g003570	.	Ab1g18782	.	.	.	.	.	.	.	.	.	.	.	.
Cs1g03150	Cc5g04422	Cx5g044470	Ci1g003560	.	Ab1g18781	Cs9g13750	Cc9g01723	Cx9g022650	.	.	Ab9g29825	.	.	.	.	.	.
Cs1g03160	.	.	Ci1g003550	Cm5g056960	Ab1g18759	.	.	.	.	.	.	.	.	.	.	.	.
Cs1g03170	Cc5g04421	Cx5g044460	Ci1g003540	.	Ab1g18773	.	.	.	.	.	.	.	.	.	.	.	.
Cs1g03180	Cc5g04420	Cx5g044450	Ci1g003530	.	Ab1g18756	.	.	.	.	.	.	.	.	.	.	.	.
Cs1g03190	Cc5g04419	Cx5g044440	Ci1g003510	Cm5g057000	Ab1g18776	Cs5g08030	Cc5g00702	Cx5g007600	Ci5g126130	Cm5g057000	Ab5g29223	Cs2g05010	Cc2g02824	Cx2g043180	Ci2g040810	.	Ab2g28447
Cs1g03200	Cc5g04417	Cx5g044420	Ci1g003490	.	Ab1g18769	.	.	.	.	.	.	.	.	.	.	.	.
Cs1g03210	Cc5g04416	Cx5g044410	Ci1g003480	.	Ab1g18766	.	.	.	.	.	.	.	.	.	.	.	.
Cs1g03220	Cc5g04415	Cx5g044400	Ci1g003470	.	Ab1g18785	.	.	.	.	.	.	.	.	.	.	.	.
Cs1g03230	Cc5g04414	Cx5g044390	Ci1g003460	.	Ab1g18761	.	.	.	.	.	.	.	.	.	.	.	.
Cs1g03240	Cc5g04413	Cx5g044380	Ci1g003450	.	Ab1g18774	Cs5g08350	Cc5g00724	Cx5g007740	Ci5g126060	Cm6g097380	Ab5g29122	.	.	.	.	.	.
Cs1g03250	Cc5g04412	Cx5g044370	.	Cm1g232650	.	.	.	.	.	.	.	.	.	.	.	.	.
Cs1g03260	Cc5g04411	Cx5g044360	.	Cm1g232660	.	Cs5g08360	.	Cx5g044310	Ci5g126050	Cm6g097390	.	.	.	.	.	.	.
Cs1g03270	Cc5g04410	Cx5g044350	Ci1g003440	Cm1g232670	Ab1g13517	Cs9g13630	Cc9g01735	Cx9g022790	.	.	Ab9g29771	.	.	.	.	.	.
Cs1g03280	Cc5g04409	Cx5g044340	Ci1g003430	Cm1g232680	Ab1g13502	.	.	.	.	.	.	.	.	.	.	.	.
Cs1g03290	Cc5g04407	Cx5g044330	Ci1g003360	Cm1g232690	Ab1g13499	Cs9g13620	Cc9g01736	Cx9g022820	.	Cm9g139210	Ab9g29817	.	.	.	.	.	.
Cs1g03300	Cc5g04406	Cx5g044320	Ci1g003350	Cm1g232700	.	Cs9g13610	Cc9g01737	Cx9g022830	.	Cm9g139200	Ab9g29841	Cs2g05270	Cc2g02801	Cx2g042880	Ci2g040570	.	Ab2g28106
Cs1g03310	Cc5g04405	Cx5g044310	Ci1g003340	Cm1g232710	.	Cs2g05280	Cc2g02800	Cx2g042870	.	.	Ab2g28190	.	.	.	.	.	.
Cs1g03320	Cc5g04404	Cx5g044290	Ci1g003320	.	.	.	.	.	.	.	.	.	.	.	.	.	.
Cs1g03330	Cc5g04403	Cx5g044280	Ci1g003310	.	Ab1g13541	Cs5g08410	Cc5g00731	Cx5g007810	Ci5g126000	Cm6g097440	Ab5g29108	.	.	.	.	.	.
Cs1g03340	Cc5g04402	Cx5g044270	Ci1g003300	.	Ab1g13514	.	.	.	.	.	.	.	.	.	.	.	.
Cs1g03350	Cc5g04401	Cx5g044260	Ci1g003290	.	Ab1g13534	.	.	.	.	.	.	.	.	.	.	.	.
Cs1g03360	Cc5g04400	Cx5g044250	Ci1g003280	.	Ab1g13508	.	.	.	.	.	.	.	.	.	.	.	.
Cs1g03370	Cc5g04398	Cx5g044230	Ci1g003270	.	Ab1g13529	Cs5g08420	Cc5g00732	Cx5g007820	Ci5g125990	Cm6g097450	Ab5g29192	.	.	.	.	.	.
Cs1g03380	.	Cx5g044220	Ci1g003260	Cm5g258310	Ab1g13545	.	.	.	.	.	.	.	.	.	.	.	.
Cs1g03390	Cc5g04397	Cx5g044210	Ci1g003250	Cm5g258320	Ab1g13504	Cs5g08460	Cc5g00735	Cx5g007850	Ci5g125960	Cm5g258320	Ab5g29127	.	.	.	.	.	.
Cs1g03400	.	.	.	.	.	.	.	.	.	.	.	.	.	.	.	.	.
Cs1g03410	Cc5g04396	Cx5g044200	Ci1g003240	.	Ab1g13527	.	.	.	.	.	.	.	.	.	.	.	.
Cs1g03420	Cc5g04395	Cx5g044190	Ci1g003230	.	Ab1g13538	.	.	.	.	.	.	.	.	.	.	.	.
Cs1g03430	Cc5g04394	Cx5g044180	Ci1g003220	.	Ab1g13500	.	.	.	.	.	.	.	.	.	.	.	.
Cs1g03440	Cc5g04393	Cx5g044170	Ci1g003210	.	Ab1g13539	.	.	.	.	.	.	.	.	.	.	.	.
Cs1g03450	Cc5g04392	Cx5g044160	Ci1g003200	.	Ab1g13519	.	.	.	.	.	.	.	.	.	.	.	.
Cs1g03460	Cc5g04391	Cx5g044150	Ci1g003190	.	Ab1g13522	.	.	.	.	.	.	.	.	.	.	.	.
Cs1g03470	.	.	.	.	.	.	.	.	.	.	.	.	.	.	.	.	.
Cs1g03480	Cc5g04389	Cx5g044130	Ci1g003170	.	Ab1g13512	.	.	.	.	.	.	.	.	.	.	.	.
Cs1g03490	Cc5g04388	Cx5g044120	Ci1g003160	Cm1g277980	Ab1g13507	.	.	.	.	.	.	.	.	.	.	.	.
Cs1g03500	Cc5g04387	Cx5g044110	Ci1g003150	.	Ab1g13498	.	.	.	.	.	.	.	.	.	.	.	.
Cs1g03510	Cc5g04386	Cx5g044100	Ci1g003140	Cm5g258440	Ab1g13543	.	.	.	.	.	.	.	.	.	.	.	.
Cs1g03520	Cc5g04385	.	Ci1g003120	.	Ab1g13546	.	.	.	.	.	.	.	.	.	.	.	.
Cs1g03530	Cc5g04384	Cx5g044090	.	.	Ab1g13533	.	.	.	.	.	.	.	.	.	.	.	.
Cs1g03540	Cc5g04383	Cx5g044060	Ci1g003110	.	Ab1g13501	.	.	.	.	.	.	.	.	.	.	.	.
Cs1g03550	Cc5g04382	Cx5g044050	Ci1g003100	.	Ab1g13526	Cs7g16070	Cc7g01292	Cx6g008430	.	.	Ab7g12707	.	.	.	.	.	.
Cs1g03560	Cc5g04381	Cx5g044030	Ci1g003090	.	Ab1g13509	.	.	.	.	.	.	.	.	.	.	.	.
Cs1g03570	Cc5g04380	Cx5g044020	Ci1g003080	.	Ab1g13524	.	.	.	.	.	.	.	.	.	.	.	.
Cs1g03580	Cc5g04379	Cx5g044010	Ci1g003070	.	Ab1g13536	.	.	.	.	.	.	.	.	.	.	.	.
Cs1g03590	Cc5g04378	Cx5g044000	Ci1g003060	.	Ab1g13518	.	.	.	.	.	.	.	.	.	.	.	.
Cs1g03600	Cc5g04377	Cx5g043990	Ci1g003050	Cm5g212630	Ab1g13530	Cs5g08690	Cc5g00757	Cx5g008070	Ci5g125740	.	.	.	.	.	.	.	.
Cs1g03610	Cc5g04376	Cx5g043980	Ci1g003040	.	Ab1g13540	.	.	.	.	.	.	.	.	.	.	.	.
Cs1g03620	Cc5g04375	Cx5g043970	Ci1g003030	.	Ab1g13525	.	.	.	.	.	.	.	.	.	.	.	.
Cs1g03630	Cc5g04374	Cx5g043960	Ci1g003020	Cm1g162710	Ab1g13520	Cs2g05730	Cc2g02753	.	Ci1g140690	.	Ab2g28175	.	.	.	.	.	.
Cs1g03640	Cc5g04373	Cx5g043950	Ci1g003010	Cm1g162720	Ab1g13544	.	.	.	.	.	.	.	.	.	.	.	.
Cs1g03650	.	.	Ci1g289590	.	.	.	.	.	.	.	.	.	.	.	.	.	.
Cs1g03660	.	.	.	.	.	.	.	.	.	.	.	.	.	.	.	.	.
Cs1g03670	Cc1g01973	Cx1g027660	.	Cm1g240780	.	.	.	.	.	.	.	.	.	.	.	.	.
Cs1g03680	Cc1g01972	Cx1g027650	.	Cm1g240790	Ab1g28734	.	.	.	.	.	.	.	.	.	.	.	.
Cs1g03690	Cc1g01971	Cx1g027640	.	Cm1g240800	Ab1g28660	.	.	.	.	.	.	.	.	.	.	.	.
Cs1g03700	Cc1g01970	Cx1g027620	Ci1g130450	Cm1g240810	Ab1g28684	Cs7g15850	Cc7g01315	.	Ci7g176160	.	.	.	.	.	.	.	.
Cs1g03710	Cc1g01969	Cx1g027610	Ci1g130460	Cm1g240820	Ab1g28735	Cs7g15830	.	.	Ci7g176150	.	.	.	.	.	.	.	.
Cs1g03720	.	Cx1g027590	.	Cm1g240830	Ab1g28708	Cs7g15720	Cc7g01328	.	Ci7g176050	.	Ab7g22029	.	.	.	.	.	.
Cs1g03730	Cc1g01968	Cx1g027580	Ci1g130480	Cm1g240840	Ab1g28670	.	.	.	.	.	.	.	.	.	.	.	.
Cs1g03740	Cc1g01967	.	.	.	.	.	.	.	.	.	.	.	.	.	.	.	.
Cs1g03750	.	.	.	.	.	.	.	.	.	.	.	.	.	.	.	.	.
Cs1g03760	.	.	.	.	.	.	.	.	.	.	.	.	.	.	.	.	.
Cs1g03770	.	.	.	.	.	.	.	.	.	.	.	.	.	.	.	.	.
Cs1g03780	.	.	.	.	Ab1g21662	.	.	.	.	.	.	.	.	.	.	.	.
Cs1g03790	.	Cx1g027360	Ci1g130490	Cm1g155960	.	.	.	.	.	.	.	.	.	.	.	.	.
Cs1g03800	.	.	.	.	Ab1g21699	.	.	.	.	.	.	.	.	.	.	.	.
Cs1g03810	.	.	.	.	.	.	.	.	.	.	.	.	.	.	.	.	.
Cs1g03820	Cc1g01962	Cx1g027350	Ci1g130520	Cm1g155990	Ab1g21700	.	.	.	.	.	.	.	.	.	.	.	.
Cs1g03830	.	.	.	.	.	.	.	.	.	.	.	.	.	.	.	.	.
Cs1g03840	Cc1g01961	.	.	.	.	.	.	.	.	.	.	.	.	.	.	.	.
Cs1g03850	Cc1g01959	Cx1g027320	.	Cm1g156000	Ab1g21665	.	.	.	.	.	.	.	.	.	.	.	.
Cs1g03860	Cc1g01958	Cx1g027310	Ci1g299020	Cm1g156010	Ab1g21674	.	.	.	.	.	.	.	.	.	.	.	.
Cs1g03870	Cc1g01956	.	.	.	.	.	.	.	.	.	.	.	.	.	.	.	.
Cs1g03880	.	.	.	.	Ab1g21679	.	.	.	.	.	.	.	.	.	.	.	.
Cs1g03890	Cc1g01955	Cx1g027300	.	Cm1g156020	Ab1g21695	.	.	.	.	.	.	.	.	.	.	.	.
Cs1g03900	Cc1g01954	Cx1g027290	.	Cm1g156030	Ab1g21686	.	.	.	.	.	.	.	.	.	.	.	.
Cs1g03910	.	.	.	.	Ab1g21661	.	.	.	.	.	.	.	.	.	.	.	.
Cs1g03920	.	Cx1g027270	.	Cm1g156060	Ab1g21676	.	.	.	.	.	.	.	.	.	.	.	.
Cs1g03930	.	.	.	.	.	.	.	.	.	.	.	.	.	.	.	.	.
Cs1g03940	.	Cx1g027250	Ci1g280470	Cm1g156070	Ab1g21672	.	.	.	.	.	.	.	.	.	.	.	.
Cs1g03950	.	.	.	.	.	.	.	.	.	.	.	.	.	.	.	.	.
Cs1g03960	.	.	.	.	.	.	.	.	.	.	.	.	.	.	.	.	.
Cs1g03970	.	.	.	.	.	.	.	.	.	.	.	.	.	.	.	.	.
Cs1g03980	Cc1g01947	Cx1g027220	Ci1g269650	.	Ab1g21677	.	.	.	.	.	.	.	.	.	.	.	.
Cs1g03990	.	Cx1g027210	.	.	Ab1g21694	.	.	.	.	.	.	.	.	.	.	.	.
Cs1g04000	.	.	.	.	.	.	.	.	.	.	.	.	.	.	.	.	.
Cs1g04010	Cc1g01944	.	Ci1g269660	.	Ab1g21703	.	.	.	.	.	.	.	.	.	.	.	.
Cs1g04020	.	.	.	.	.	.	.	.	.	.	.	.	.	.	.	.	.
Cs1g04030	Cc1g01940	Cx1g027160	.	.	Ab1g21667	.	.	.	.	.	.	.	.	.	.	.	.
Cs1g04040	.	Cx1g027150	.	.	Ab1g21678	.	.	.	.	.	.	.	.	.	.	.	.
Cs1g04050	.	.	.	.	Ab1g21705	.	.	.	.	.	.	.	.	.	.	.	.
Cs1g04060	Cc1g01939	Cx1g027140	.	.	Ab1g21698	.	.	.	.	.	.	.	.	.	.	.	.
Cs1g04070	Cc1g01938	Cx1g027130	.	.	Ab1g21696	Cs3g21810	Cc3g02341	.	Ci3g164720	Cm1g062350	.	.	.	.	.	.	.
Cs1g04080	Cc1g01937	Cx1g027120	.	.	Ab1g21656	.	.	.	.	.	.	.	.	.	.	.	.
Cs1g04090	Cc1g01936	Cx1g027110	.	.	Ab1g21704	.	.	.	.	.	.	.	.	.	.	.	.
Cs1g04100	Cc1g01935	Cx1g027100	.	.	Ab1g21690	.	.	.	.	.	.	.	.	.	.	.	.
Cs1g04110	.	Cx1g027090	.	.	Ab1g21664	.	.	.	.	.	.	.	.	.	.	.	.
Cs1g04115	.	.	.	.	.	.	.	.	.	.	.	.	.	.	.	.	.
Cs1g04120	Cc1g01934	Cx1g027080	Ci1g134530	.	Ab1g21658	.	.	.	.	.	.	.	.	.	.	.	.
Cs1g04130	Cc1g01933	Cx1g027070	Ci1g134540	.	Ab1g21682	.	.	.	.	.	.	.	.	.	.	.	.
Cs1g04140	Cc1g01931	.	.	.	.	.	.	.	.	.	.	.	.	.	.	.	.
Cs1g04150	.	.	.	.	Ab1g21671	.	.	.	.	.	.	.	.	.	.	.	.
Cs1g04160	.	.	.	.	.	.	.	.	.	.	.	.	.	.	.	.	.
Cs1g04170	.	.	.	.	.	.	.	.	.	.	.	.	.	.	.	.	.
Cs1g04180	.	Cx1g027010	.	.	Ab1g21692	.	.	.	.	.	.	.	.	.	.	.	.
Cs1g04190	.	.	.	.	.	.	.	.	.	.	.	.	.	.	.	.	.
Cs1g04200	Cc1g01926	Cx1g026970	.	.	.	.	.	.	.	.	.	.	.	.	.	.	.
Cs1g04210	.	.	.	.	.	.	.	.	.	.	.	.	.	.	.	.	.
Cs1g04220	.	.	.	.	.	.	.	.	.	.	.	.	.	.	.	.	.
Cs1g04230	.	.	.	.	.	.	.	.	.	.	.	.	.	.	.	.	.
Cs1g04235	.	.	.	.	.	.	.	.	.	.	.	.	.	.	.	.	.
Cs1g04240	.	.	.	.	.	.	.	.	.	.	.	.	.	.	.	.	.
Cs1g04250	.	.	.	.	.	.	.	.	.	.	.	.	.	.	.	.	.
Cs1g04260	.	.	.	Cm1g169530	.	.	.	.	.	.	.	.	.	.	.	.	.
Cs1g04270	.	.	.	.	Ab1g17171	.	.	.	.	.	.	.	.	.	.	.	.
Cs1g04280	Cc1g01922	Cx1g026870	.	Cm1g169540	Ab1g16168	.	.	.	.	.	.	.	.	.	.	.	.
Cs1g04290	Cc1g01918	Cx1g026850	.	Cm1g169600	Ab1g16167	.	.	.	.	.	.	.	.	.	.	.	.
Cs1g04300	.	.	.	Cm1g169650	.	.	.	.	.	.	.	.	.	.	.	.	.
Cs1g04310	.	.	.	.	.	.	.	.	.	.	.	.	.	.	.	.	.
Cs1g04320	.	.	.	.	.	.	.	.	.	.	.	.	.	.	.	.	.
Cs1g04330	.	.	.	.	.	.	.	.	.	.	.	.	.	.	.	.	.
Cs1g04340	.	.	.	.	.	.	.	.	.	.	.	.	.	.	.	.	.
Cs1g04350	Cc1g01914	Cx1g026810	.	Cm3g234720	Ab3g35355	Cs3g21810	Cc3g02341	.	Ci3g164720	Cm1g062350	.	.	.	.	.	.	.
Cs1g04360	Cc1g01913	Cx1g026800	.	.	Ab3g35596	Cs3g21780	Cc3g02338	Cx3g018830	Ci3g164690	.	Ab3g35596	.	.	.	.	.	.
Cs1g04370	Cc1g01912	Cx1g026790	.	.	.	.	.	.	.	.	.	.	.	.	.	.	.
Cs1g04380	.	.	.	.	.	.	.	.	.	.	.	.	.	.	.	.	.
Cs1g04390	Cc1g01910	Cx1g026770	.	.	.	.	.	.	.	.	.	.	.	.	.	.	.
Cs1g04400	Cc1g01908	Cx1g026750	.	.	.	.	.	.	.	.	.	.	.	.	.	.	.
Cs1g04410	.	.	.	.	.	.	.	.	.	.	.	.	.	.	.	.	.
Cs1g04420	Cc1g01906	Cx1g026720	Ci1g237920	.	.	.	.	.	.	.	.	.	.	.	.	.	.
Cs1g04430	Cc1g01905	Cx1g026710	.	.	.	.	.	.	.	.	.	.	.	.	.	.	.
Cs1g04440	.	Cx1g026700	.	.	.	.	.	.	.	.	.	.	.	.	.	.	.
Cs1g04450	.	.	.	.	.	.	.	.	.	.	.	.	.	.	.	.	.
Cs1g04460	Cc1g01904	.	.	.	.	.	.	.	.	.	.	.	.	.	.	.	.
Cs1g04470	Cc1g01903	.	Ci1g311100	.	.	.	.	.	.	.	.	.	.	.	.	.	.
Cs1g04480	.	Cx1g026680	.	Cm1g215650	.	.	.	.	.	.	.	.	.	.	.	.	.
Cs1g04485	.	.	.	.	.	.	.	.	.	.	.	.	.	.	.	.	.
Cs1g04490	.	.	.	Cm1g215660	.	.	.	.	.	.	.	.	.	.	.	.	.
Cs1g04500	.	.	.	.	.	.	.	.	.	.	.	.	.	.	.	.	.
Cs1g04510	.	.	.	.	.	.	.	.	.	.	.	.	.	.	.	.	.
Cs1g04520	.	.	Ci3g065840	.	.	.	.	.	.	.	.	.	.	.	.	.	.
Cs1g04530	Cc1g01898	Cx1g026650	.	.	.	.	.	.	.	.	.	.	.	.	.	.	.
Cs1g04540	.	Cx1g026640	.	.	.	.	.	.	.	.	.	.	.	.	.	.	.
Cs1g04550	.	Cx1g026610	.	.	.	.	.	.	.	.	.	.	.	.	.	.	.
Cs1g04560	Cc1g01896	Cx1g026590	.	.	.	.	.	.	.	.	.	.	.	.	.	.	.
Cs1g04570	Cc1g01895	Cx1g026580	Ci3g065830	.	Ab1g36374	.	.	.	.	.	.	.	.	.	.	.	.
Cs1g04580	Cc1g01894	Cx1g026570	.	.	.	.	.	.	.	.	.	.	.	.	.	.	.
Cs1g04590	Cc1g01892	Cx1g026550	Ci3g065730	Cm3g252660	Ab3g35525	Cs3g21640	Cc3g02321	.	Ci3g065730	Cm3g252660	Ab3g35525	.	.	.	.	.	.
Cs1g04600	Cc1g01891	Cx1g026540	.	.	Ab1g19310	.	.	.	.	.	.	.	.	.	.	.	.
Cs1g04610	Cc1g01890	Cx1g026530	Ci3g065760	Cm3g252640	Ab1g19311	Cs3g21610	Cc3g02318	Cx3g018600	Ci3g065760	Cm3g252640	Ab3g35111	.	.	.	.	.	.
Cs1g04620	Cc1g01888	Cx1g026510	.	.	.	.	.	.	.	.	.	.	.	.	.	.	.
Cs1g04630	.	.	.	.	.	.	.	.	.	.	.	.	.	.	.	.	.
Cs1g04640	Cc1g01887	Cx1g026490	Ci3g065720	.	Ab1g16508	.	.	.	.	.	.	.	.	.	.	.	.
Cs1g04650	Cc1g01886	Cx1g026480	Ci1g208760	Cm1g227590	Ab1g16511	.	.	.	.	.	.	.	.	.	.	.	.
Cs1g04660	.	.	.	.	.	.	.	.	.	.	.	.	.	.	.	.	.
Cs1g04670	.	.	Ci1g208780	Cm1g227600	.	.	.	.	.	.	.	.	.	.	.	.	.
Cs1g04680	Cc1g01885	Cx1g026460	Ci1g208800	Cm1g227640	Ab1g38250	.	.	.	.	.	.	.	.	.	.	.	.
Cs1g04690	Cc1g01883	Cx1g026450	.	.	Ab1g38247	.	.	.	.	.	.	.	.	.	.	.	.
Cs1g04700	Cc1g01882	Cx1g026440	Ci3g065630	.	Ab1g38231	.	.	.	.	.	.	.	.	.	.	.	.
Cs1g04705	.	.	.	.	.	.	.	.	.	.	.	.	.	.	.	.	.
Cs1g04710	.	.	.	.	.	.	.	.	.	.	.	.	.	.	.	.	.
Cs1g04720	.	Cx1g026400	.	Cm1g228810	.	.	.	.	.	.	.	.	.	.	.	.	.
Cs1g04730	.	Cx1g026360	.	.	Ab1g38230	.	.	.	.	.	.	.	.	.	.	.	.
Cs1g04740	Cc1g01881	Cx1g026350	Ci1g304780	Cm1g262010	Ab1g38248	.	.	.	.	.	.	.	.	.	.	.	.
Cs1g04750	Cc1g01880	Cx1g026330	.	.	Ab1g38254	.	.	.	.	.	.	.	.	.	.	.	.
Cs1g04760	Cc1g01879	Cx1g026320	Ci1g284260	.	Ab1g38244	.	.	.	.	.	.	.	.	.	.	.	.
Cs1g04770	.	.	.	.	.	.	.	.	.	.	.	.	.	.	.	.	.
Cs1g04780	Cc1g01878	Cx1g026310	.	.	Ab1g38245	.	.	.	.	.	.	.	.	.	.	.	.
Cs1g04790	Cc1g01877	Cx1g026300	.	.	.	.	.	.	.	.	.	.	.	.	.	.	.
Cs1g04800	Cc1g01876	Cx1g026280	.	.	Ab1g38261	.	.	.	.	.	.	.	.	.	.	.	.
Cs1g04810	Cc1g01875	Cx1g026270	.	.	Ab1g38242	.	.	.	.	.	.	.	.	.	.	.	.
Cs1g04820	Cc1g01872	Cx1g026240	.	.	Ab1g38262	.	.	.	.	.	.	.	.	.	.	.	.
Cs1g04830	Cc1g01871	Cx1g026230	.	.	Ab1g38235	.	.	.	.	.	.	.	.	.	.	.	.
Cs1g04840	Cc1g01870	Cx1g026220	Ci3g093240	.	Ab1g38252	.	.	.	.	.	.	.	.	.	.	.	.
Cs1g04850	Cc1g01869	Cx1g026210	.	.	Ab1g38255	.	.	.	.	.	.	.	.	.	.	.	.
Cs1g04860	Cc1g01868	Cx1g026200	.	.	Ab1g38243	.	.	.	.	.	.	.	.	.	.	.	.
Cs1g04870	Cc1g01867	Cx1g026190	Ci1g239120	Cm1g262050	.	.	.	.	.	.	.	.	.	.	.	.	.
Cs1g04880	.	.	.	.	.	.	.	.	.	.	.	.	.	.	.	.	.
Cs1g04890	Cc1g01865	Cx1g026180	Ci1g239130	Cm1g262060	.	.	.	.	.	.	.	.	.	.	.	.	.
Cs1g04900	Cc1g01864	.	Ci1g239140	Cm1g262070	.	.	.	.	.	.	.	.	.	.	.	.	.
Cs1g04910	Cc1g01863	Cx1g026170	.	.	.	.	.	.	.	.	.	.	.	.	.	.	.
Cs1g04920	Cc1g01862	Cx1g026160	.	Cm3g041850	Ab3g35024	Cs3g21460	Cc3g02306	Cx3g018470	Ci3g065890	Cm3g298960	Ab3g35024	.	.	.	.	.	.
Cs1g04930	Cc1g01861	Cx1g026150	Ci3g065890	Cm3g041840	Ab3g34921	Cs3g21450	Cc3g02305	Cx3g018460	Ci3g065900	Cm3g041850	Ab3g34921	.	.	.	.	.	.
Cs1g04940	Cc1g01860	Cx1g026140	Ci1g239290	.	.	.	.	.	.	.	.	.	.	.	.	.	.
Cs1g04950	.	Cx1g026130	.	Cm1g232060	.	.	.	.	.	.	.	.	.	.	.	.	.
Cs1g04960	Cc1g01859	Cx1g026120	.	.	.	.	.	.	.	.	.	.	.	.	.	.	.
Cs1g04970	Cc1g01858	Cx1g026110	.	.	.	.	.	.	.	.	.	.	.	.	.	.	.
Cs1g04980	Cc1g01857	Cx1g026100	.	.	.	.	.	.	.	.	.	.	.	.	.	.	.
Cs1g04990	Cc1g01856	Cx1g026090	Ci1g201160	.	.	.	.	.	.	.	.	.	.	.	.	.	.
Cs1g05000	Cc1g01854	Cx1g026080	Ci1g201180	.	.	.	.	.	.	.	.	.	.	.	.	.	.
Cs1g05010	.	.	.	.	.	.	.	.	.	.	.	.	.	.	.	.	.
Cs1g05015	.	.	.	.	.	.	.	.	.	.	.	.	.	.	.	.	.
Cs1g05020	Cc1g01853	Cx1g026060	Ci1g201200	.	Ab1g14029	.	.	.	.	.	.	.	.	.	.	.	.
Cs1g05030	.	.	.	.	.	.	.	.	.	.	.	.	.	.	.	.	.
Cs1g05040	Cc1g01852	Cx1g026050	Ci1g201240	Cm1g174730	Ab1g14028	.	.	.	.	.	.	.	.	.	.	.	.
Cs1g05050	.	.	.	.	.	.	.	.	.	.	.	.	.	.	.	.	.
Cs1g05060	Cc1g01850	Cx1g026030	Ci1g201250	Cm1g174740	Ab1g14020	.	.	.	.	.	.	.	.	.	.	.	.
Cs1g05070	Cc1g01848	Cx1g026020	Ci1g201260	Cm1g174750	.	.	.	.	.	.	.	.	.	.	.	.	.
Cs1g05080	.	.	.	.	.	.	.	.	.	.	.	.	.	.	.	.	.
Cs1g05090	Cc1g01846	Cx1g025990	Ci1g201270	Cm1g174760	Ab1g14036	.	.	.	.	.	.	.	.	.	.	.	.
Cs1g05100	Cc1g01844	Cx1g025980	Ci1g201280	.	.	.	.	.	.	.	.	.	.	.	.	.	.
Cs1g05110	Cc1g01842	.	.	.	.	.	.	.	.	.	.	.	.	.	.	.	.
Cs1g05120	.	.	.	.	.	.	.	.	.	.	.	.	.	.	.	.	.
Cs1g05130	.	.	.	.	.	.	.	.	.	.	.	.	.	.	.	.	.
Cs1g05140	.	.	.	.	.	.	.	.	.	.	.	.	.	.	.	.	.
Cs1g05150	.	.	.	.	.	.	.	.	.	.	.	.	.	.	.	.	.
Cs1g05160	.	.	.	.	.	.	.	.	.	.	.	.	.	.	.	.	.
Cs1g05170	.	.	.	.	.	.	.	.	.	.	.	.	.	.	.	.	.
Cs1g05180	.	.	.	.	.	.	.	.	.	.	.	.	.	.	.	.	.
Cs1g05190	.	.	.	.	.	.	.	.	.	.	.	.	.	.	.	.	.
Cs1g05200	.	.	.	.	.	.	.	.	.	.	.	.	.	.	.	.	.
Cs1g05210	Cc1g01831	Cx1g025810	.	Cm1g261390	Ab1g11963	.	.	.	.	.	.	.	.	.	.	.	.
Cs1g05220	.	.	.	.	.	.	.	.	.	.	.	.	.	.	.	.	.
Cs1g05230	.	.	.	.	.	.	.	.	.	.	.	.	.	.	.	.	.
Cs1g05240	.	.	.	.	.	.	.	.	.	.	.	.	.	.	.	.	.
Cs1g05250	.	.	.	.	.	.	.	.	.	.	.	.	.	.	.	.	.
Cs1g05260	.	.	.	.	.	.	.	.	.	.	.	.	.	.	.	.	.
Cs1g05270	.	.	.	.	.	.	.	.	.	.	.	.	.	.	.	.	.
Cs1g05280	.	.	.	.	.	.	.	.	.	.	.	.	.	.	.	.	.
Cs1g05290	.	.	.	.	.	.	.	.	.	.	.	.	.	.	.	.	.
Cs1g05300	.	.	.	.	.	.	.	.	.	.	.	.	.	.	.	.	.
Cs1g05310	.	.	.	.	.	.	.	.	.	.	.	.	.	.	.	.	.
Cs1g05320	.	.	.	.	.	.	.	.	.	.	.	.	.	.	.	.	.
Cs1g05330	.	.	.	.	.	.	.	.	.	.	.	.	.	.	.	.	.
Cs1g05340	.	.	.	.	.	.	.	.	.	.	.	.	.	.	.	.	.
Cs1g05350	Cc1g01824	.	Ci1g291490	Cm1g287050	Ab1g33299	.	.	.	.	.	.	.	.	.	.	.	.
Cs1g05360	.	Cx1g025640	.	Cm1g185730	Ab1g33335	.	.	.	.	.	.	.	.	.	.	.	.
Cs1g05370	.	.	.	.	.	.	.	.	.	.	.	.	.	.	.	.	.
Cs1g05380	.	.	.	.	.	.	.	.	.	.	.	.	.	.	.	.	.
Cs1g05390	Cc1g01817	Cx1g025630	.	Cm1g185790	Ab1g33307	.	.	.	.	.	.	.	.	.	.	.	.
Cs1g05400	.	.	.	.	.	.	.	.	.	.	.	.	.	.	.	.	.
Cs1g05410	Cc1g01813	Cx1g025590	.	Cm1g185800	Ab1g33351	.	.	.	.	.	.	.	.	.	.	.	.
Cs1g05420	Cc1g01812	Cx1g025580	Ci3g066270	Cm1g185810	Ab3g35173	Cs3g21105	Cc3g02269	Cx3g018170	Ci3g066270	Cm3g041510	Ab3g35173	.	.	.	.	.	.
Cs1g05430	Cc1g01810	Cx1g025570	.	Cm1g185820	Ab1g33331	.	.	.	.	.	.	.	.	.	.	.	.
Cs1g05440	.	Cx1g025550	.	.	.	.	.	.	.	.	.	.	.	.	.	.	.
Cs1g05450	Cc1g01808	Cx1g025540	Ci1g291500	Cm1g185850	Ab1g33308	.	.	.	.	.	.	.	.	.	.	.	.
Cs1g05460	.	.	.	.	.	.	.	.	.	.	.	.	.	.	.	.	.
Cs1g05470	Cc1g01806	Cx1g025520	.	Cm1g185900	Ab1g33361	.	.	.	.	.	.	.	.	.	.	.	.
Cs1g05480	Cc1g01805	Cx1g025500	Ci3g066420	Cm1g185920	Ab1g33365	Cs3g20930	Cc3g02258	Cx3g018010	Ci3g066420	Cm3g041370	Ab3g35568	.	.	.	.	.	.
Cs1g05490	Cc1g01804	Cx1g025490	.	Cm1g185930	Ab1g33296	.	.	.	.	.	.	.	.	.	.	.	.
Cs1g05500	Cc1g01803	Cx1g025480	Ci3g066440	Cm1g185940	Ab1g33313	Cs3g20910	Cc3g02256	Cx3g017990	Ci3g066440	Cm3g041350	Ab3g35053	.	.	.	.	.	.
Cs1g05510	.	Cx1g025470	.	.	Ab1g33304	.	.	.	.	.	.	.	.	.	.	.	.
Cs1g05520	.	.	.	.	.	Cs2g07130	.	.	.	.	.	.	.	.	.	.	.
Cs1g05530	.	Cx1g025460	.	Cm1g185950	Ab1g33321	.	.	.	.	.	.	.	.	.	.	.	.
Cs1g05540	.	Cx1g025450	.	.	Ab1g33329	.	.	.	.	.	.	.	.	.	.	.	.
Cs1g05550	Cc3g00713	Cx1g025430	Ci3g066480	Cm1g140500	Ab1g33319	.	.	.	.	.	.	.	.	.	.	.	.
Cs1g05560	Cc3g00712	Cx1g025420	.	Cm1g140510	Ab1g33362	.	.	.	.	.	.	.	.	.	.	.	.
Cs1g05570	Cc3g00711	Cx1g025410	.	Cm1g140520	Ab1g33349	.	.	.	.	.	.	.	.	.	.	.	.
Cs1g05580	.	.	.	.	.	.	.	.	.	.	.	.	.	.	.	.	.
Cs1g05590	.	.	.	.	Ab1g24710	.	.	.	.	.	.	.	.	.	.	.	.
Cs1g05600	Cc3g00710	Cx1g025400	.	Cm1g140540	Ab1g33297	.	.	.	.	.	.	.	.	.	.	.	.
Cs1g05610	.	.	.	.	.	.	.	.	.	.	.	.	.	.	.	.	.
Cs1g05620	Cc3g00709	Cx1g025370	.	Cm1g140580	Ab1g33339	.	.	.	.	.	.	.	.	.	.	.	.
Cs1g05630	.	.	.	.	.	.	.	.	.	.	.	.	.	.	.	.	.
Cs1g05640	.	.	.	.	.	.	.	.	.	.	.	.	.	.	.	.	.
Cs1g05650	.	.	.	.	.	.	.	.	.	.	.	.	.	.	.	.	.
Cs1g05660	.	.	.	.	.	.	.	.	.	.	.	.	.	.	.	.	.
Cs1g05670	.	Cx1g025320	.	Cm1g140620	.	.	.	.	.	.	.	.	.	.	.	.	.
Cs1g05680	Cc3g00708	Cx1g025300	Ci1g285420	Cm1g140630	Ab1g33327	.	.	.	.	.	.	.	.	.	.	.	.
Cs1g05690	.	Cx1g025290	Ci1g285430	.	.	.	.	.	.	.	.	.	.	.	.	.	.
Cs1g05700	Cc3g00706	Cx1g025280	Ci1g285440	Cm1g140660	Ab1g33316	.	.	.	.	.	.	.	.	.	.	.	.
Cs1g05710	Cc3g00705	Cx1g025270	Ci1g285450	Cm1g140670	Ab1g33317	.	.	.	.	.	.	.	.	.	.	.	.
Cs1g05720	Cc3g00704	Cx1g025260	.	Cm1g140680	Ab1g33352	.	.	.	.	.	.	.	.	.	.	.	.
Cs1g05730	.	.	Ci1g285480	.	.	.	.	.	.	.	.	.	.	.	.	.	.
Cs1g05740	.	.	.	Cm1g140700	.	.	.	.	.	.	.	.	.	.	.	.	.
Cs1g05750	Cc3g00703	Cx1g025230	Ci1g285490	Cm1g140710	Ab1g33326	.	.	.	.	.	.	.	.	.	.	.	.
Cs1g05760	.	.	.	.	.	.	.	.	.	.	.	.	.	.	.	.	.
Cs1g05770	Cc3g00701	Cx1g025210	.	Cm1g140750	Ab1g33358	.	.	.	.	.	.	.	.	.	.	.	.
Cs1g05780	Cc3g00700	Cx1g025200	.	Cm1g140760	Ab1g33318	.	.	.	.	.	.	.	.	.	.	.	.
Cs1g05790	.	.	.	.	.	.	.	.	.	.	.	.	.	.	.	.	.
Cs1g05800	.	.	.	.	.	.	.	.	.	.	.	.	.	.	.	.	.
Cs1g05810	.	.	.	.	.	.	.	.	.	.	.	.	.	.	.	.	.
Cs1g05820	.	Cx1g025180	.	Cm1g140780	.	.	.	.	.	.	.	.	.	.	.	.	.
Cs1g05830	Cc3g00699	Cx1g025170	.	Cm1g140790	Ab1g33325	.	.	.	.	.	.	.	.	.	.	.	.
Cs1g05835	.	.	.	.	.	.	.	.	.	.	.	.	.	.	.	.	.
Cs1g05840	Cc3g00697	Cx1g025160	.	.	.	.	.	.	.	.	.	.	.	.	.	.	.
Cs1g05850	.	.	.	.	Ab1g33337	.	.	.	.	.	.	.	.	.	.	.	.
Cs1g05860	.	.	.	Cm1g140800	.	.	.	.	.	.	.	.	.	.	.	.	.
Cs1g05870	.	.	.	.	.	.	.	.	.	.	.	.	.	.	.	.	.
Cs1g05880	.	.	.	.	.	.	.	.	.	.	.	.	.	.	.	.	.
Cs1g05890	.	.	.	.	.	.	.	.	.	.	.	.	.	.	.	.	.
Cs1g05900	Cc3g00694	.	.	.	.	.	.	.	.	.	.	.	.	.	.	.	.
Cs1g05910	Cc3g00693	.	.	.	.	.	.	.	.	.	.	.	.	.	.	.	.
Cs1g05920	Cc3g00692	Cx1g025120	.	.	.	.	.	.	.	.	.	.	.	.	.	.	.
Cs1g05930	.	.	.	.	.	.	.	.	.	.	.	.	.	.	.	.	.
Cs1g05940	.	.	.	.	.	.	.	.	.	.	.	.	.	.	.	.	.
Cs1g05950	.	.	.	Cm1g022670	.	.	.	.	.	.	.	.	.	.	.	.	.
Cs1g05960	.	.	.	.	.	.	.	.	.	.	.	.	.	.	.	.	.
Cs1g05970	.	.	.	.	.	.	.	.	.	.	.	.	.	.	.	.	.
Cs1g05980	.	.	.	.	.	.	.	.	.	.	.	.	.	.	.	.	.
Cs1g05990	.	.	.	.	.	.	.	.	.	.	.	.	.	.	.	.	.
Cs1g06000	.	.	.	.	.	.	.	.	.	.	.	.	.	.	.	.	.
Cs1g06010	Cc4g01307	Cx2g022150	.	Cm1g022770	Ab1g33155	Cs2g07090	Cc2g02618	Cx2g041040	Ci2g166130	Cm1g022790	Ab2g28116	.	.	.	.	.	.
Cs1g06020	Cc4g01306	Cx2g022120	Ci8g063530	Cm1g022790	Ab1g33175	.	.	.	.	.	.	.	.	.	.	.	.
Cs1g06030	.	.	.	.	.	.	.	.	.	.	.	.	.	.	.	.	.
Cs1g06040	Cc4g01305	Cx2g022110	Ci8g063540	Cm1g022820	Ab1g33165	Cs2g07080	Cc2g02619	Cx2g041050	.	Cm1g022820	Ab2g28172	.	.	.	.	.	.
Cs1g06045	.	.	.	.	.	.	.	.	.	.	.	.	.	.	.	.	.
Cs1g06050	Cc4g01303	Cx2g022100	Ci8g063550	Cm1g022830	Ab1g33161	Cs2g07069	Cc2g02620	Cx2g041060	Ci2g166140	Cm1g022830	Ab2g28292	.	.	.	.	.	.
Cs1g06060	Cc4g01302	.	.	Cm1g022840	Ab1g33177	.	.	.	.	.	.	.	.	.	.	.	.
Cs1g06070	Cc4g01300	Cx2g022080	Ci8g063560	Cm1g022890	Ab1g33156	.	.	.	.	.	.	.	.	.	.	.	.
Cs1g06080	.	Cx2g022070	Ci8g063570	Cm1g022900	Ab1g33174	.	.	.	.	.	.	.	.	.	.	.	.
Cs1g06090	.	.	.	.	Ab1g33149	.	.	.	.	.	.	.	.	.	.	.	.
Cs1g06095	Cc4g01299	.	Ci8g063580	Cm1g022910	.	.	.	.	.	.	.	.	.	.	.	.	.
Cs1g06100	.	.	.	.	.	.	.	.	.	.	.	.	.	.	.	.	.
Cs1g06110	.	.	.	.	.	.	.	.	.	.	.	.	.	.	.	.	.
Cs1g06120	.	.	.	Cm1g022920	.	.	.	.	.	.	.	.	.	.	.	.	.
Cs1g06130	Cc4g01298	Cx2g022060	.	Cm1g022930	.	.	.	.	.	.	.	.	.	.	.	.	.
Cs1g06140	Cc4g01297	Cx2g022050	Ci8g063590	Cm1g022940	Ab1g33162	.	.	.	.	.	.	.	.	.	.	.	.
Cs1g06150	Cc4g01296	Cx2g022040	.	Cm1g022950	Ab1g33154	.	.	.	.	.	.	.	.	.	.	.	.
Cs1g06160	.	Cx2g022030	Ci1g135090	Cm1g022960	Ab1g33179	.	.	.	.	.	.	.	.	.	.	.	.
Cs1g06170	.	Cx2g022020	Ci1g135110	Cm1g022970	Ab1g33163	Cs2g07020	Cc2g02626	Cx2g041110	Ci2g166190	Cm1g022980	Ab2g28197	.	.	.	.	.	.
Cs1g06180	.	Cx2g022010	Ci1g135120	Cm1g022980	Ab1g33182	.	.	.	.	.	.	.	.	.	.	.	.
Cs1g06190	.	Cx2g021990	Ci1g135130	Cm1g022990	Ab1g33146	.	.	.	.	.	.	.	.	.	.	.	.
Cs1g06200	.	Cx2g021940	Ci1g135150	.	Ab1g33181	.	.	.	.	.	.	.	.	.	.	.	.
Cs1g06210	.	.	.	.	.	.	.	.	.	.	.	.	.	.	.	.	.
Cs1g06220	.	.	.	.	.	.	.	.	.	.	.	.	.	.	.	.	.
Cs1g06230	Cc4g01294	Cx2g021920	Ci1g135170	.	Ab1g33188	Cs2g22740	.	.	.	.	Ab2g37224	.	.	.	.	.	.
Cs1g06240	Cc4g01293	Cx2g021910	.	.	.	.	.	.	.	.	.	.	.	.	.	.	.
Cs1g06250	Cc4g01290	Cx2g021900	Ci1g135190	.	Ab1g33158	.	.	.	.	.	.	.	.	.	.	.	.
Cs1g06260	.	.	.	.	.	.	.	.	.	.	.	.	.	.	.	.	.
Cs1g06270	.	.	.	Cm1g070270	.	.	.	.	.	.	.	.	.	.	.	.	.
Cs1g06280	.	.	.	.	.	.	.	.	.	.	.	.	.	.	.	.	.
Cs1g06290	Cc4g01288	Cx2g021870	Ci1g135230	Cm1g212520	Ab1g33159	Cs2g06920	Cc2g02637	Cx2g041210	Ci2g166290	Cm2g250260	Ab2g28211	.	.	.	.	.	.
Cs1g06300	Cc4g01286	Cx2g021860	Ci1g135240	Cm1g212530	Ab1g33185	.	.	.	.	.	.	.	.	.	.	.	.
Cs1g06310	Cc4g01285	Cx2g021850	Ci1g135250	Cm1g212540	Ab1g33180	.	.	.	.	.	.	.	.	.	.	.	.
Cs1g06320	Cc4g01284	Cx2g021840	Ci1g135260	Cm1g212550	Ab1g33173	.	.	.	.	.	.	.	.	.	.	.	.
Cs1g06330	Cc4g01283	Cx2g021820	Ci1g135270	Cm1g212560	Ab1g33187	.	.	.	.	.	.	.	.	.	.	.	.
Cs1g06340	Cc4g01282	Cx2g021810	Ci1g135280	Cm1g212570	Ab1g33153	.	.	.	.	.	.	.	.	.	.	.	.
Cs1g06350	Cc4g01281	.	Ci1g135290	Cm1g212580	Ab1g33186	.	.	.	.	.	.	.	.	.	.	.	.
Cs1g06360	Cc4g01280	Cx2g021790	Ci1g135300	Cm1g212590	Ab1g33168	.	.	.	.	.	.	.	.	.	.	.	.
Cs1g06370	Cc4g01279	Cx2g021780	Ci1g135310	Cm1g212600	Ab1g33169	.	.	.	.	.	.	.	.	.	.	.	.
Cs1g06380	Cc4g01278	Cx2g021770	Ci1g135320	Cm1g152520	Ab1g33148	.	.	.	.	.	.	.	.	.	.	.	.
Cs1g06390	.	Cx2g021760	Ci1g135330	Cm1g152530	Ab1g33160	Cs2g06770	Cc2g02655	Cx2g041380	Ci1g135330	Cm2g233810	Ab2g27932	.	.	.	.	.	.
Cs1g06400	Cc4g01277	Cx2g021750	Ci1g135340	Cm1g152540	Ab1g33145	.	.	.	.	.	.	.	.	.	.	.	.
Cs1g06410	Cc4g01276	Cx2g021740	Ci1g135350	Cm1g152550	Ab1g33150	Cs2g06730	Cc2g02659	.	Ci1g135350	Cm1g152550	Ab2g28027	.	.	.	.	.	.
Cs1g06420	Cc4g01275	Cx2g021730	Ci1g135360	Cm1g152560	Ab1g33172	Cs2g06720	Cc2g02660	Cx2g041420	Ci1g135360	Cm2g233770	Ab2g28377	.	.	.	.	.	.
Cs1g06430	.	.	.	.	.	.	.	.	.	.	.	.	.	.	.	.	.
Cs1g06440	Cc4g01273	Cx2g021710	Ci1g135380	Cm1g152570	Ab1g33147	.	.	.	.	.	.	.	.	.	.	.	.
Cs1g06450	Cc4g01272	Cx2g021700	Ci1g135410	Cm1g152610	Ab1g21430	.	.	.	.	.	.	.	.	.	.	.	.
Cs1g06460	Cc4g01270	Cx2g021680	Ci1g135440	Cm1g152640	Ab1g21527	.	.	.	.	.	.	.	.	.	.	.	.
Cs1g06470	Cc4g01269	Cx2g021670	Ci1g135450	Cm1g152650	Ab1g21454	.	.	.	.	.	.	.	.	.	.	.	.
Cs1g06480	Cc4g01268	Cx2g021650	Ci1g135460	Cm1g152660	.	.	.	.	.	.	.	.	.	.	.	.	.
Cs1g06490	Cc4g01267	.	Ci1g135470	Cm1g152670	.	.	.	.	.	.	.	.	.	.	.	.	.
Cs1g06500	.	Cx2g021640	Ci1g135480	.	Ab1g21420	.	.	.	.	.	.	.	.	.	.	.	.
Cs1g06510	.	.	.	.	.	.	.	.	.	.	.	.	.	.	.	.	.
Cs1g06520	.	.	.	.	.	.	.	.	.	.	.	.	.	.	.	.	.
Cs1g06525	Cc4g01266	Cx2g021620	Ci1g135510	Cm1g152680	Ab1g21482	.	.	.	.	.	.	.	.	.	.	.	.
Cs1g06530	Cc4g01265	Cx2g021610	Ci1g135520	Cm1g152690	Ab1g21412	Cs2g23010	Cc2g01335	Cx2g015470	Ci2g170950	Cm1g152690	Ab2g18975	.	.	.	.	.	.
Cs1g06540	Cc4g01263	Cx2g021600	Ci1g135530	Cm1g152710	Ab1g21408	.	.	.	.	.	.	.	.	.	.	.	.
Cs1g06550	.	.	.	.	.	.	.	.	.	.	.	.	.	.	.	.	.
Cs1g06560	Cc4g01262	Cx2g021580	Ci1g135550	Cm1g152720	Ab1g21495	.	.	.	.	.	.	.	.	.	.	.	.
Cs1g06570	.	.	.	.	.	.	.	.	.	.	.	.	.	.	.	.	.
Cs1g06580	Cc4g01261	Cx2g021570	Ci1g135560	Cm1g152730	Ab1g21470	.	.	.	.	.	.	.	.	.	.	.	.
Cs1g06590	Cc4g01260	Cx2g021560	Ci1g135570	Cm1g152740	Ab1g21421	Cs2g06710	Cc2g02661	Cx2g041430	Ci1g135570	Cm2g233760	.	.	.	.	.	.	.
Cs1g06600	.	.	Ci1g135580	.	.	.	.	.	.	.	.	.	.	.	.	.	.
Cs1g06610	Cc4g01259	Cx2g021540	Ci1g135610	Cm1g152750	Ab1g21399	.	.	.	.	.	.	.	.	.	.	.	.
Cs1g06620	Cc4g01258	Cx2g021530	Ci1g135620	Cm1g152760	Ab1g21529	.	.	.	.	.	.	.	.	.	.	.	.
Cs1g06630	Cc4g01257	Cx2g021520	Ci1g135630	Cm1g152770	Ab1g21526	.	.	.	.	.	.	.	.	.	.	.	.
Cs1g06640	Cc4g01256	Cx2g021510	Ci1g135640	Cm1g152780	Ab1g21418	.	.	.	.	.	.	.	.	.	.	.	.
Cs1g06650	.	.	.	.	.	.	.	.	.	.	.	.	.	.	.	.	.
Cs1g06660	Cc4g01253	Cx2g021480	Ci1g135680	Cm1g152810	Ab1g21437	Cs2g06630	Cc2g02671	Cx2g041490	Ci2g193360	Cm2g212430	Ab2g28226	.	.	.	.	.	.
Cs1g06670	.	.	.	.	.	.	.	.	.	.	.	.	.	.	.	.	.
Cs1g06680	Cc4g01252	Cx2g021470	Ci1g135690	.	Ab1g21522	.	.	.	.	.	.	.	.	.	.	.	.
Cs1g06690	.	.	.	Cm1g269760	Ab1g21487	.	.	.	.	.	.	.	.	.	.	.	.
Cs1g06700	Cc4g01251	Cx2g021460	Ci1g135700	Cm1g269770	Ab1g21389	.	.	.	.	.	.	.	.	.	.	.	.
Cs1g06710	Cc4g01250	Cx2g021450	Ci1g135710	Cm1g269780	Ab1g21516	.	.	.	.	.	.	.	.	.	.	.	.
Cs1g06720	.	.	.	.	.	.	.	.	.	.	.	.	.	.	.	.	.
Cs1g06730	.	.	.	.	.	.	.	.	.	.	.	.	.	.	.	.	.
Cs1g06740	Cc4g01246	Cx2g021390	Ci1g135740	.	Ab1g21386	.	.	.	.	.	.	.	.	.	.	.	.
Cs1g06750	.	.	.	.	.	.	.	.	.	.	.	.	.	.	.	.	.
Cs1g06760	.	.	.	.	.	.	.	.	.	.	.	.	.	.	.	.	.
Cs1g06770	Cc4g01242	Cx2g021320	.	.	Ab1g21460	.	.	.	.	.	.	.	.	.	.	.	.
Cs1g06780	.	.	Ci1g256090	Cm2g212250	.	.	.	.	.	.	.	.	.	.	.	.	.
Cs1g06790	Cc4g01240	Cx2g021290	Ci1g256110	.	Ab1g21400	.	.	.	.	.	.	.	.	.	.	.	.
Cs1g06800	Cc4g01238	Cx2g021280	Ci1g256130	Cm2g212230	Ab1g21474	Cs2g06450	Cc2g02688	Cx2g041690	Ci2g193550	Cm2g212230	Ab2g28007	.	.	.	.	.	.
Cs1g06810	Cc4g01237	Cx2g021270	Ci1g256140	.	Ab1g21394	Cs2g06440	Cc2g02689	.	Ci2g193570	.	Ab2g27929	.	.	.	.	.	.
Cs1g06820	Cc4g01235	Cx2g021260	Ci1g256150	.	Ab1g21431	.	.	.	.	.	.	.	.	.	.	.	.
Cs1g06830	Cc4g01234	Cx2g021250	Ci1g256160	Cm2g212200	Ab1g21508	Cs2g06410	Cc2g02693	Cx2g041720	Ci1g256160	Cm2g212200	Ab2g27944	.	.	.	.	.	.
Cs1g06840	Cc4g01233	Cx2g021220	Ci1g256170	.	Ab1g21448	.	.	.	.	.	.	.	.	.	.	.	.
Cs1g06850	Cc4g01232	Cx2g021210	Ci1g256180	Cm1g147590	Ab1g21401	.	.	.	.	.	.	.	.	.	.	.	.
Cs1g06860	Cc4g01231	Cx2g021200	Ci1g256190	Cm1g147600	Ab1g21406	.	.	.	.	.	.	.	.	.	.	.	.
Cs1g06870	Cc4g01230	Cx2g021190	Ci1g256200	.	Ab1g21438	.	.	.	.	.	.	.	.	.	.	.	.
Cs1g06880	Cc4g01229	Cx2g021180	Ci1g256210	.	Ab1g21499	Cs2g06290	Cc2g02706	Cx2g041840	Ci2g193730	Cm2g199090	Ab2g28120	.	.	.	.	.	.
Cs1g06890	.	.	.	.	.	.	.	.	.	.	.	.	.	.	.	.	.
Cs1g06900	.	.	.	.	.	.	.	.	.	.	.	.	.	.	.	.	.
Cs1g06910	Cc4g01228	Cx2g021170	Ci1g256220	.	Ab1g21433	Cs2g06270	Cc2g02709	Cx2g041860	Ci2g193760	.	Ab2g28454	.	.	.	.	.	.
Cs1g06915	Cc4g01227	Cx2g021160	Ci1g256230	.	Ab1g21419	.	.	.	.	.	.	.	.	.	.	.	.
Cs1g06920	.	.	.	.	.	.	.	.	.	.	.	.	.	.	.	.	.
Cs1g06930	Cc4g01226	Cx2g021140	Ci1g264000	.	Ab1g21468	.	.	.	.	.	.	.	.	.	.	.	.
Cs1g06940	.	.	.	.	.	.	.	.	.	.	.	.	.	.	.	.	.
Cs1g06950	.	.	Ci1g264010	.	Ab1g21397	.	.	.	.	.	.	.	.	.	.	.	.
Cs1g06960	Cc4g01224	.	.	.	Ab1g21484	.	.	.	.	.	.	.	.	.	.	.	.
Cs1g06970	Cc4g01223	Cx2g021050	Ci1g264020	.	.	.	.	.	.	.	.	.	.	.	.	.	.
Cs1g06980	Cc4g01222	Cx2g021020	Ci1g264030	.	Ab1g21463	.	.	.	.	.	.	.	.	.	.	.	.
Cs1g06990	Cc4g01221	Cx2g021010	Ci1g264040	.	.	.	.	.	.	.	.	.	.	.	.	.	.
Cs1g07000	Cc4g01220	Cx2g021000	Ci1g264050	.	Ab1g21450	.	.	.	.	.	.	.	.	.	.	.	.
Cs1g07010	Cc4g01219	Cx2g020990	.	.	Ab1g21434	Cs2g06150	Cc2g02719	Cx2g041980	Ci2g193880	Cm1g103610	Ab2g28435	.	.	.	.	.	.
Cs1g07020	Cc4g01218	.	Ci1g264060	.	.	.	.	.	.	.	.	.	.	.	.	.	.
Cs1g07030	Cc4g01217	Cx2g020980	.	.	Ab1g21485	.	.	.	.	.	.	.	.	.	.	.	.
Cs1g07040	.	.	Ci1g264070	.	.	.	.	.	.	.	.	.	.	.	.	.	.
Cs1g07050	.	.	.	.	.	.	.	.	.	.	.	.	.	.	.	.	.
Cs1g07060	Cc4g01215	Cx2g020940	Ci1g264090	.	Ab1g21442	.	.	.	.	.	.	.	.	.	.	.	.
Cs1g07070	.	.	.	.	.	.	.	.	.	.	.	.	.	.	.	.	.
Cs1g07080	Cc4g01214	Cx2g020920	Ci1g264100	.	Ab1g21510	.	.	.	.	.	.	.	.	.	.	.	.
Cs1g07090	.	Cx2g020910	Ci1g264110	.	Ab1g21446	Cs2g06130	Cc2g02721	.	Ci2g193900	.	Ab2g28257	.	.	.	.	.	.
Cs1g07100	Cc4g01213	Cx2g020900	Ci1g264120	.	Ab1g21414	.	.	.	.	.	.	.	.	.	.	.	.
Cs1g07110	Cc4g01211	Cx2g020890	Ci1g264130	.	Ab1g21443	Cs2g06115	Cc2g02724	Cx2g042020	Ci1g264130	.	Ab2g27978	.	.	.	.	.	.
Cs1g07120	Cc4g01210	Cx2g020880	Ci7g161480	.	Ab1g21503	.	.	.	.	.	.	.	.	.	.	.	.
Cs1g07130	Cc4g01208	Cx2g020860	Ci7g161500	.	Ab1g21476	.	.	.	.	.	.	.	.	.	.	.	.
Cs1g07140	Cc4g01207	Cx2g020850	Ci7g161520	.	Ab1g21432	.	.	.	.	.	.	.	.	.	.	.	.
Cs1g07150	.	.	.	.	.	.	.	.	.	.	.	.	.	.	.	.	.
Cs1g07160	.	.	Ci7g161560	Cm1g103350	.	.	.	.	.	.	.	.	.	.	.	.	.
Cs1g07170	.	.	.	.	.	.	.	.	.	.	.	.	.	.	.	.	.
Cs1g07180	.	.	Ci7g161580	Cm1g103390	.	.	.	.	.	.	.	.	.	.	.	.	.
Cs1g07190	Cc4g01206	.	Ci7g161590	.	Ab1g21404	.	.	.	.	.	.	.	.	.	.	.	.
Cs1g07200	.	.	.	.	.	.	.	.	.	.	.	.	.	.	.	.	.
Cs1g07210	Cc4g01199	Cx4g009380	Ci7g161600	.	.	.	.	.	.	.	.	.	.	.	.	.	.
Cs1g07220	.	.	Ci7g161610	Cm1g103410	.	.	.	.	.	.	.	.	.	.	.	.	.
Cs1g07230	.	Cx4g009410	Ci7g161620	.	Ab1g21477	.	.	.	.	.	.	.	.	.	.	.	.
Cs1g07240	.	.	Ci7g161630	Cm1g103420	.	.	.	.	.	.	.	.	.	.	.	.	.
Cs1g07245	.	.	.	.	.	.	.	.	.	.	.	.	.	.	.	.	.
Cs1g07250	Cc4g01196	Cx4g009590	Ci7g161640	.	.	.	.	.	.	.	.	.	.	.	.	.	.
Cs1g07260	Cc4g01195	.	Ci1g260500	Cm2g199300	Ab1g21451	.	.	.	.	.	.	.	.	.	.	.	.
Cs1g07270	.	.	.	.	.	.	.	.	.	.	.	.	.	.	.	.	.
Cs1g07280	Cc4g01194	Cx4g009600	Ci1g260510	.	.	.	.	.	.	.	.	.	.	.	.	.	.
Cs1g07290	.	.	.	.	.	.	.	.	.	.	.	.	.	.	.	.	.
Cs1g07300	Cc4g01193	Cx4g009610	Ci1g260530	.	Ab1g21411	.	.	.	.	.	.	.	.	.	.	.	.
Cs1g07310	Cc4g01191	.	.	Cm1g244570	Ab1g21483	Cs2g06030	Cc2g02732	Cx2g042140	Ci8g183390	.	Ab2g28296	.	.	.	.	.	.
Cs1g07320	Cc4g01190	Cx4g009630	.	Cm1g244580	Ab1g21518	.	.	.	.	.	.	.	.	.	.	.	.
Cs1g07330	.	Cx4g009640	.	.	Ab1g21398	.	.	.	.	.	.	.	.	.	.	.	.
Cs1g07340	Cc4g01187	Cx4g009660	.	.	Ab1g21396	.	.	.	.	.	.	.	.	.	.	.	.
Cs1g07350	Cc4g01185	Cx4g009690	.	.	Ab1g21486	Cs2g06010	Cc2g02735	Cx2g042170	Ci8g231050	.	Ab2g28310	.	.	.	.	.	.
Cs1g07360	.	.	.	.	.	.	.	.	.	.	.	.	.	.	.	.	.
Cs1g07370	.	Cx4g009710	.	.	Ab1g21458	.	.	.	.	.	.	.	.	.	.	.	.
Cs1g07380	Cc4g01183	Cx4g009720	.	.	Ab1g21387	.	.	.	.	.	.	.	.	.	.	.	.
Cs1g07390	Cc4g01179	Cx4g009730	.	.	Ab1g21521	.	.	.	.	.	.	.	.	.	.	.	.
Cs1g07400	Cc4g01178	Cx4g009740	.	.	Ab1g21428	Cs2g23080	Cc2g01331	Cx2g015530	Ci2g171010	Cm1g244480	Ab2g18994	.	.	.	.	.	.
Cs1g07410	Cc4g01177	Cx4g009750	.	.	Ab1g21441	.	.	.	.	.	.	.	.	.	.	.	.
Cs1g07420	Cc4g01176	Cx4g009760	.	.	Ab1g21462	.	.	.	.	.	.	.	.	.	.	.	.
Cs1g07430	Cc4g01175	Cx4g009770	.	.	Ab1g21513	.	.	.	.	.	.	.	.	.	.	.	.
Cs1g07440	Cc4g01174	Cx4g009790	.	Cm1g318180	Ab1g21492	.	.	.	.	.	.	.	.	.	.	.	.
Cs1g07450	Cc4g01173	Cx4g009800	.	.	Ab1g21440	.	.	.	.	.	.	.	.	.	.	.	.
Cs1g07460	Cc4g01172	Cx4g009810	.	Cm2g258980	Ab1g21385	Cs2g05860	Cc2g02743	Cx2g042310	Ci1g229270	Cm2g258980	Ab2g28372	.	.	.	.	.	.
Cs1g07470	Cc4g01171	Cx4g009830	Ci1g229250	.	Ab1g21429	.	.	.	.	.	.	.	.	.	.	.	.
Cs1g07480	Cc4g01170	Cx4g009840	Ci1g229260	.	Ab1g21445	.	.	.	.	.	.	.	.	.	.	.	.
Cs1g07490	.	.	.	.	.	.	.	.	.	.	.	.	.	.	.	.	.
Cs1g07500	Cc4g01169	Cx4g009850	Ci1g173750	.	Ab1g21519	.	.	.	.	.	.	.	.	.	.	.	.
Cs1g07510	Cc4g01168	Cx4g009860	Ci1g173760	.	.	Cs2g23410	.	Cx2g013450	.	Cm2g055020	Ab2g32880	.	.	.	.	.	.
Cs1g07520	Cc4g01167	Cx4g009870	Ci1g173770	.	Ab1g21501	.	.	.	.	.	.	.	.	.	.	.	.
Cs1g07530	.	.	.	.	.	.	.	.	.	.	.	.	.	.	.	.	.
Cs1g07540	.	Cx4g009880	Ci1g173800	Cm1g140380	Ab1g21407	.	.	.	.	.	.	.	.	.	.	.	.
Cs1g07550	.	.	Ci1g140640	Cm1g140390	.	.	.	.	.	.	.	.	.	.	.	.	.
Cs1g07560	.	.	.	.	.	.	.	.	.	.	.	.	.	.	.	.	.
Cs1g07570	.	.	.	.	.	.	.	.	.	.	.	.	.	.	.	.	.
Cs1g07580	.	.	.	.	.	.	.	.	.	.	.	.	.	.	.	.	.
Cs1g07590	Cc4g01163	Cx4g009930	Ci1g140660	.	Ab1g21402	.	.	.	.	.	.	.	.	.	.	.	.
Cs1g07600	.	.	.	.	.	.	.	.	.	.	.	.	.	.	.	.	.
Cs1g07610	Cc4g01160	Cx4g009950	Ci1g140680	.	Ab1g21422	.	.	.	.	.	.	.	.	.	.	.	.
Cs1g07620	Cc4g01159	Cx4g009960	Ci1g140690	.	Ab1g21517	Cs2g05730	Cc2g02753	.	Ci1g140690	.	Ab2g28175	.	.	.	.	.	.
Cs1g07630	Cc4g01158	Cx4g009970	Ci1g140700	.	Ab1g21413	.	.	.	.	.	.	.	.	.	.	.	.
Cs1g07640	Cc4g01156	Cx4g009980	Ci1g140710	.	Ab1g21467	.	.	.	.	.	.	.	.	.	.	.	.
Cs1g07650	Cc4g01155	Cx4g009990	Ci1g140730	.	Ab1g21405	.	.	.	.	.	.	.	.	.	.	.	.
Cs1g07660	.	.	.	.	.	.	.	.	.	.	.	.	.	.	.	.	.
Cs1g07670	.	.	.	.	.	.	.	.	.	.	.	.	.	.	.	.	.
Cs1g07680	Cc4g01153	.	.	.	.	.	.	.	.	.	.	.	.	.	.	.	.
Cs1g07690	Cc4g01152	Cx4g010010	Ci1g140750	.	Ab1g21472	.	.	.	.	.	.	.	.	.	.	.	.
Cs1g07700	.	.	.	.	.	.	.	.	.	.	.	.	.	.	.	.	.
Cs1g07710	.	.	.	.	.	.	.	.	.	.	.	.	.	.	.	.	.
Cs1g07720	.	Cx4g010020	.	.	.	.	.	.	.	.	.	.	.	.	.	.	.
Cs1g07730	.	Cx4g010030	.	.	.	.	.	.	.	.	.	.	.	.	.	.	.
Cs1g07740	.	.	Ci1g140760	.	.	.	.	.	.	.	.	.	.	.	.	.	.
Cs1g07750	.	.	Ci1g140780	.	.	.	.	.	.	.	.	.	.	.	.	.	.
Cs1g07760	.	.	.	.	.	.	.	.	.	.	.	.	.	.	.	.	.
Cs1g07770	Cc4g01150	.	Ci1g140790	Cm1g245640	.	.	.	.	.	.	.	.	.	.	.	.	.
Cs1g07780	.	Cx4g010070	.	.	.	.	.	.	.	.	.	.	.	.	.	.	.
Cs1g07790	.	.	.	.	.	.	.	.	.	.	.	.	.	.	.	.	.
Cs1g07800	.	Cx4g010110	.	.	.	Cs3g20170	Cc3g02177	Cx3g017060	Ci3g067440	Cm3g040420	Ab3g35216	.	.	.	.	.	.
Cs1g07810	.	.	.	.	.	.	.	.	.	.	.	.	.	.	.	.	.
Cs1g07820	.	.	.	.	.	.	.	.	.	.	.	.	.	.	.	.	.
Cs1g07830	.	.	.	.	.	.	.	.	.	.	.	.	.	.	.	.	.
Cs1g07840	.	.	.	.	.	.	.	.	.	.	.	.	.	.	.	.	.
Cs1g07850	.	.	.	.	.	.	.	.	.	.	.	.	.	.	.	.	.
Cs1g07860	.	.	.	.	.	.	.	.	.	.	.	.	.	.	.	.	.
Cs1g07870	.	.	.	.	.	.	.	.	.	.	.	.	.	.	.	.	.
Cs1g07880	.	.	.	.	.	.	.	.	.	.	.	.	.	.	.	.	.
Cs1g07890	.	.	.	.	.	.	.	.	.	.	.	.	.	.	.	.	.
Cs1g07900	.	.	.	.	.	.	.	.	.	.	.	.	.	.	.	.	.
Cs1g07910	.	.	.	.	.	.	.	.	.	.	.	.	.	.	.	.	.
Cs1g07920	Cc4g01148	Cx4g010130	.	Cm1g193380	Ab1g21455	Cs1g18410	Cc1g00843	Cx1g009590	Ci1g254120	.	Ab1g16800	.	.	.	.	.	.
Cs1g07930	Cc4g01147	Cx4g010140	Ci1g140800	Cm1g193390	Ab1g21410	.	.	.	.	.	.	.	.	.	.	.	.
Cs1g07940	Cc4g01146	Cx4g010150	.	Cm2g245860	Ab1g21465	Cs2g05630	Cc2g02762	Cx2g042520	Ci1g140800	.	Ab2g28099	.	.	.	.	.	.
Cs1g07950	Cc4g01145	Cx4g010160	.	Cm1g193400	Ab1g21506	Cs2g05620	Cc2g02763	Cx2g042530	.	.	Ab2g27962	.	.	.	.	.	.
Cs1g07960	.	.	.	.	.	.	.	.	.	.	.	.	.	.	.	.	.
Cs1g07970	.	.	.	.	.	.	.	.	.	.	.	.	.	.	.	.	.
Cs1g07980	Cc4g01143	Cx4g010200	Ci1g140820	Cm1g193430	Ab1g21494	.	.	.	.	.	.	.	.	.	.	.	.
Cs1g07990	Cc4g01142	Cx4g010210	Ci1g140830	Cm1g193440	Ab1g21449	.	.	.	.	.	.	.	.	.	.	.	.
Cs1g08000	.	.	.	.	.	.	.	.	.	.	.	.	.	.	.	.	.
Cs1g08010	Cc4g01140	Cx4g010230	Ci1g140850	Cm1g207570	Ab1g21525	Cs2g23740	.	Cx2g013210	Ci2g258520	Cm1g207570	Ab2g32885	.	.	.	.	.	.
Cs1g08020	Cc4g01139	Cx4g010240	Ci1g140860	.	Ab1g21461	.	.	.	.	.	.	.	.	.	.	.	.
Cs1g08030	Cc4g01138	Cx4g010270	.	.	Ab1g21395	.	.	.	.	.	.	.	.	.	.	.	.
Cs1g08040	.	.	.	.	.	.	.	.	.	.	.	.	.	.	.	.	.
Cs1g08050	Cc4g01136	Cx4g010280	Ci1g257220	.	Ab1g21489	.	.	.	.	.	.	.	.	.	.	.	.
Cs1g08060	Cc4g01135	Cx4g010290	.	Cm1g234510	Ab1g21528	.	.	.	.	.	.	.	.	.	.	.	.
Cs1g08070	.	Cx4g010300	.	.	.	.	.	.	.	.	.	.	.	.	.	.	.
Cs1g08080	.	.	.	.	.	.	.	.	.	.	.	.	.	.	.	.	.
Cs1g08090	.	.	.	.	.	.	.	.	.	.	.	.	.	.	.	.	.
Cs1g08100	.	.	.	.	.	.	.	.	.	.	.	.	.	.	.	.	.
Cs1g08110	.	.	Ci1g262200	Cm1g145610	.	.	.	.	.	.	.	.	.	.	.	.	.
Cs1g08120	.	.	.	.	.	.	.	.	.	.	.	.	.	.	.	.	.
Cs1g08130	Cc4g01131	Cx4g010350	Ci1g262210	Cm1g145620	Ab1g24284	.	.	.	.	.	.	.	.	.	.	.	.
Cs1g08140	Cc4g01130	Cx4g010360	Ci1g262220	Cm1g145630	.	.	.	.	.	.	.	.	.	.	.	.	.
Cs1g08150	Cc4g01129	Cx4g010380	Ci1g262240	Cm1g145640	.	.	.	.	.	.	.	.	.	.	.	.	.
Cs1g08160	Cc4g01128	Cx4g010400	Ci1g262250	Cm1g145650	.	.	.	.	.	.	.	.	.	.	.	.	.
Cs1g08170	Cc4g01127	Cx4g010410	Ci1g262260	Cm1g145660	.	.	.	.	.	.	.	.	.	.	.	.	.
Cs1g08180	Cc4g01126	.	.	.	.	.	.	.	.	.	.	.	.	.	.	.	.
Cs1g08190	Cc4g01125	.	.	.	.	.	.	.	.	.	.	.	.	.	.	.	.
Cs1g08200	.	.	.	.	.	.	.	.	.	.	.	.	.	.	.	.	.
Cs1g08205	.	.	.	.	.	.	.	.	.	.	.	.	.	.	.	.	.
Cs1g08210	Cc4g01124	Cx4g010430	Ci1g262280	Cm1g145680	.	.	.	.	.	.	.	.	.	.	.	.	.
Cs1g08220	.	.	.	.	.	.	.	.	.	.	.	.	.	.	.	.	.
Cs1g08230	Cc3g00605	.	.	.	Ab1g20749	.	.	.	.	.	.	.	.	.	.	.	.
Cs1g08240	Cc3g00604	.	.	.	Ab1g20755	.	.	.	.	.	.	.	.	.	.	.	.
Cs1g08250	Cc3g00602	.	Ci1g258060	.	Ab1g20748	.	.	.	.	.	.	.	.	.	.	.	.
Cs1g08260	Cc3g00601	.	Ci1g258080	Cm1g268570	Ab1g20731	.	.	.	.	.	.	.	.	.	.	.	.
Cs1g08270	Cc3g00600	.	Ci1g258090	.	Ab1g20750	Cs3g20130	Cc3g02172	.	Ci3g067490	Cm3g040380	.	Cs2g24220	.	.	.	Cm1g268560	.
Cs1g08280	Cc3g00599	.	Ci1g258100	.	Ab1g20773	.	.	.	.	.	.	.	.	.	.	.	.
Cs1g08290	Cc3g00598	Cx1g024470	Ci1g258110	.	Ab1g20732	.	.	.	.	.	.	.	.	.	.	.	.
Cs1g08300	.	.	.	.	.	.	.	.	.	.	.	.	.	.	.	.	.
Cs1g08310	.	.	.	.	.	.	.	.	.	.	.	.	.	.	.	.	.
Cs1g08320	.	.	.	.	.	.	.	.	.	.	.	.	.	.	.	.	.
Cs1g08330	.	.	.	.	.	.	.	.	.	.	.	.	.	.	.	.	.
Cs1g08340	Cc3g00595	Cx1g024440	.	.	Ab1g20720	Cs3g20070	Cc3g02162	Cx3g016920	.	.	Ab3g35372	Cs2g24670	Cc2g01188	Cx2g011580	Ci2g075370	Cm7g073330	Ab2g26601
Cs1g08350	.	Cx1g024430	Ci1g257690	Cm1g172600	.	.	.	.	.	.	.	.	.	.	.	.	.
Cs1g08360	Cc3g00594	Cx1g024420	Ci1g257700	Cm1g172610	Ab1g20725	.	.	.	.	.	.	.	.	.	.	.	.
Cs1g08370	Cc3g00593	Cx1g024340	.	Cm1g172630	Ab1g20722	.	.	.	.	.	.	.	.	.	.	.	.
Cs1g08380	Cc3g00592	Cx1g024330	.	Cm1g172640	Ab1g20757	Cs3g19930	Cc3g02151	Cx3g016810	Ci3g092790	Cm3g264870	Ab3g35708	Cs1g18300	Cc1g00854	Cx1g009700	Ci1g254230	.	Ab1g16775
Cs1g08390	Cc3g00591	Cx1g024320	.	Cm1g172650	Ab1g20772	Cs3g19920	Cc3g02150	Cx3g016800	Ci3g092790	Cm3g264860	Ab3g35579	Cs1g18190	Cc1g00867	Cx1g009800	Ci1g060200	.	Ab1g16799
Cs1g08400	.	Cx1g024310	.	.	.	.	.	.	.	.	.	.	.	.	.	.	.
Cs1g08410	.	.	.	Cm1g172660	Ab1g20775	Cs1g18140	Cc1g00871	Cx1g009850	Ci1g060160	Cm2g200710	Ab1g16881	.	.	.	.	.	.
Cs1g08420	.	.	.	.	.	.	.	.	.	.	.	.	.	.	.	.	.
Cs1g08430	Cc3g00590	Cx1g024290	.	.	Ab1g20745	Cs3g19850	Cc3g02141	Cx3g016730	.	Cm3g022260	Ab3g34875	.	.	.	.	.	.
Cs1g08440	.	.	.	.	.	.	.	.	.	.	.	.	.	.	.	.	.
Cs1g08450	Cc3g00588	Cx1g024270	Ci1g263930	Cm1g172670	Ab1g20768	Cs3g19840	Cc3g02140	.	Ci3g092870	.	Ab3g34862	.	.	.	.	.	.
Cs1g08460	.	Cx1g024250	.	Cm1g172690	Ab1g20723	.	.	.	.	.	.	.	.	.	.	.	.
Cs1g08470	.	.	.	Cm1g172700	Ab1g20762	.	.	.	.	.	.	.	.	.	.	.	.
Cs1g08480	Cc3g00587	Cx1g024240	.	Cm1g172710	Ab1g20724	Cs3g19820	Cc3g02138	Cx3g016710	Ci3g092890	Cm3g022230	Ab3g35460	.	.	.	.	.	.
Cs1g08485	.	.	.	.	.	.	.	.	.	.	.	.	.	.	.	.	.
Cs1g08490	Cc3g00585	Cx1g024230	.	.	Ab1g20739	.	.	.	.	.	.	.	.	.	.	.	.
Cs1g08500	Cc3g00584	Cx1g024220	.	.	Ab1g20730	.	.	.	.	.	.	.	.	.	.	.	.
Cs1g08505	.	.	.	.	.	.	.	.	.	.	.	.	.	.	.	.	.
Cs1g08510	Cc3g00583	Cx1g024210	.	.	Ab1g20733	.	.	.	.	.	.	.	.	.	.	.	.
Cs1g08520	.	.	.	.	.	.	.	.	.	.	.	.	.	.	.	.	.
Cs1g08530	.	.	.	.	.	.	.	.	.	.	.	.	.	.	.	.	.
Cs1g08535	.	.	.	.	.	.	.	.	.	.	.	.	.	.	.	.	.
Cs1g08540	Cc3g00582	Cx1g024140	.	.	Ab1g20737	.	.	.	.	.	.	.	.	.	.	.	.
Cs1g08550	Cc3g00581	Cx1g024130	Ci1g183950	Cm1g166690	Ab1g20721	.	.	.	.	.	.	.	.	.	.	.	.
Cs1g08560	Cc3g00579	.	Ci1g183960	.	Ab1g20751	Cs3g19660	Cc3g02122	Cx3g016560	Ci3g093040	Cm3g022080	Ab3g35441	.	.	.	.	.	.
Cs1g08570	.	.	.	.	.	.	.	.	.	.	.	.	.	.	.	.	.
Cs1g08580	Cc3g00578	Cx1g024120	.	.	Ab1g20764	.	.	.	.	.	.	.	.	.	.	.	.
Cs1g08590	.	Cx1g024110	.	.	Ab1g20769	.	.	.	.	.	.	.	.	.	.	.	.
Cs1g08600	Cc3g00577	Cx1g024100	.	.	Ab1g20752	.	.	.	.	.	.	.	.	.	.	.	.
Cs1g08610	Cc3g00576	Cx1g024070	.	.	Ab1g20729	.	.	.	.	.	.	.	.	.	.	.	.
Cs1g08620	.	.	.	.	.	.	.	.	.	.	.	.	.	.	.	.	.
Cs1g08630	.	Cx1g024040	.	.	.	.	.	.	.	.	.	.	.	.	.	.	.
Cs1g08640	Cc3g00574	Cx1g024030	Ci1g257160	Cm1g271960	Ab1g20761	.	.	.	.	.	.	.	.	.	.	.	.
Cs1g08650	Cc3g00573	Cx1g024020	.	.	Ab1g20767	.	.	.	.	.	.	.	.	.	.	.	.
Cs1g08660	.	.	.	.	.	.	.	.	.	.	.	.	.	.	.	.	.
Cs1g08670	.	.	.	.	.	.	.	.	.	.	.	.	.	.	.	.	.
Cs1g08680	Cc3g00572	Cx1g023980	Ci1g197420	.	Ab1g27896	.	.	.	.	.	.	.	.	.	.	.	.
Cs1g08690	Cc3g00571	.	.	.	.	.	.	.	.	.	.	.	.	.	.	.	.
Cs1g08700	.	.	.	.	Ab1g27906	.	.	.	.	.	.	.	.	.	.	.	.
Cs1g08710	.	.	.	.	.	.	.	.	.	.	.	.	.	.	.	.	.
Cs1g08720	Cc3g00570	.	Ci1g197440	.	.	.	.	.	.	.	.	.	.	.	.	.	.
Cs1g08730	.	.	Ci1g197450	Cm1g231570	.	.	.	.	.	.	.	.	.	.	.	.	.
Cs1g08740	.	.	.	.	.	.	.	.	.	.	.	.	.	.	.	.	.
Cs1g08750	.	.	.	.	.	.	.	.	.	.	.	.	.	.	.	.	.
Cs1g08760	.	.	.	.	.	Cs1g17800	Cc1g00906	Cx1g010190	.	Cm4g086810	Ab1g16750	.	.	.	.	.	.
Cs1g08770	.	.	Ci1g197470	.	.	.	.	.	.	.	.	.	.	.	.	.	.
Cs1g08780	.	.	.	.	.	.	.	.	.	.	.	.	.	.	.	.	.
Cs1g08790	.	.	.	.	.	.	.	.	.	.	.	.	.	.	.	.	.
Cs1g08800	.	.	.	.	.	.	.	.	.	.	.	.	.	.	.	.	.
Cs1g08810	Cc3g00565	.	.	.	.	.	.	.	.	.	.	.	.	.	.	.	.
Cs1g08820	.	.	.	.	.	.	.	.	.	.	.	.	.	.	.	.	.
Cs1g08830	.	.	.	.	.	.	.	.	.	.	.	.	.	.	.	.	.
Cs1g08840	Cc3g00563	.	Ci1g197530	Cm1g258130	Ab1g28531	.	.	.	.	.	.	.	.	.	.	.	.
Cs1g08850	Cc3g00562	Cx1g023890	.	.	Ab1g28539	.	.	.	.	.	.	.	.	.	.	.	.
Cs1g08860	.	.	Ci1g241610	.	.	.	.	.	.	.	.	.	.	.	.	.	.
Cs1g08870	Cc3g00560	.	.	.	Ab1g28549	.	.	.	.	.	.	.	.	.	.	.	.
Cs1g08880	.	.	.	.	.	.	.	.	.	.	.	.	.	.	.	.	.
Cs1g08890	Cc3g00558	.	.	.	Ab1g28550	.	.	.	.	.	.	.	.	.	.	.	.
Cs1g08900	Cc3g00557	.	.	.	Ab1g28529	.	.	.	.	.	.	.	.	.	.	.	.
Cs1g08910	.	.	.	.	.	.	.	.	.	.	.	.	.	.	.	.	.
Cs1g08920	Cc3g00555	Cx1g023500	Ci1g191930	Cm1g144280	Ab1g28533	.	.	.	.	.	.	.	.	.	.	.	.
Cs1g08930	.	.	.	.	.	.	.	.	.	.	.	.	.	.	.	.	.
Cs1g08940	Cc3g00553	Cx1g023490	Ci1g191940	.	Ab1g28534	.	.	.	.	.	.	.	.	.	.	.	.
Cs1g08950	Cc3g00552	Cx1g023480	Ci1g191950	.	Ab1g28545	.	.	.	.	.	.	.	.	.	.	.	.
Cs1g08960	.	.	.	.	.	.	.	.	.	.	.	.	.	.	.	.	.
Cs1g08970	.	.	.	.	.	.	.	.	.	.	.	.	.	.	.	.	.
Cs1g08980	Cc3g00551	.	.	.	.	.	.	.	.	.	.	.	.	.	.	.	.
Cs1g08990	.	.	.	.	.	.	.	.	.	.	.	.	.	.	.	.	.
Cs1g09000	.	.	.	.	.	.	.	.	.	.	.	.	.	.	.	.	.
Cs1g09010	.	.	Ci1g104200	.	Ab1g33337	.	.	.	.	.	.	.	.	.	.	.	.
Cs1g09020	.	.	.	.	.	.	.	.	.	.	.	.	.	.	.	.	.
Cs1g09030	.	.	.	.	.	.	.	.	.	.	.	.	.	.	.	.	.
Cs1g09040	.	.	Ci1g104310	Cm1g204700	.	.	.	.	.	.	.	.	.	.	.	.	.
Cs1g09050	Cc3g00686	.	Ci1g104320	Cm1g204710	.	.	.	.	.	.	.	.	.	.	.	.	.
Cs1g09060	Cc3g00685	.	Ci1g104330	Cm1g204720	.	.	.	.	.	.	.	.	.	.	.	.	.
Cs1g09070	Cc3g00684	.	Ci1g104340	Cm1g204730	.	.	.	.	.	.	.	.	.	.	.	.	.
Cs1g09080	Cc3g00683	.	Ci1g104350	Cm1g204740	.	.	.	.	.	.	.	.	.	.	.	.	.
Cs1g09090	.	.	.	.	.	.	.	.	.	.	.	.	.	.	.	.	.
Cs1g09100	Cc3g00682	.	Ci1g287390	Cm1g204750	Ab1g33308	.	.	.	.	.	.	.	.	.	.	.	.
Cs1g09110	Cc3g00681	.	.	Cm1g204760	Ab1g31620	.	.	.	.	.	.	.	.	.	.	.	.
Cs1g09120	Cc3g00680	.	.	Cm1g204770	Ab1g31632	.	.	.	.	.	.	.	.	.	.	.	.
Cs1g09140	Cc3g00679	.	.	.	.	.	.	.	.	.	.	.	.	.	.	.	.
Cs1g09130	Cc3g00678	.	Ci1g154660	Cm1g082070	Ab1g26480	.	.	.	.	.	.	.	.	.	.	.	.
Cs1g09150	.	.	Ci1g154670	.	.	.	.	.	.	.	.	.	.	.	.	.	.
Cs1g09160	.	.	.	.	.	.	.	.	.	.	.	.	.	.	.	.	.
Cs1g09170	.	.	.	.	.	.	.	.	.	.	.	.	.	.	.	.	.
Cs1g09180	.	.	.	Cm1g082170	Ab1g26482	.	.	.	.	.	.	.	.	.	.	.	.
Cs1g09190	.	.	.	.	.	.	.	.	.	.	.	.	.	.	.	.	.
Cs1g09200	Cc3g00674	.	.	Cm1g082200	.	.	.	.	.	.	.	.	.	.	.	.	.
Cs1g09210	.	.	.	.	.	.	.	.	.	.	.	.	.	.	.	.	.
Cs1g09220	.	.	.	.	.	.	.	.	.	.	.	.	.	.	.	.	.
Cs1g09230	Cc3g00672	Cx1g023430	Ci1g281820	.	.	.	.	.	.	.	.	.	.	.	.	.	.
Cs1g09240	.	.	.	.	.	.	.	.	.	.	.	.	.	.	.	.	.
Cs1g09250	Cc3g00668	Cx1g023400	.	Cm1g159890	Ab1g38157	.	.	.	.	.	.	.	.	.	.	.	.
Cs1g09252	.	.	.	.	.	.	.	.	.	.	.	.	.	.	.	.	.
Cs1g09254	Cc3g00667	Cx1g023390	.	.	Ab1g38176	.	.	.	.	.	.	.	.	.	.	.	.
Cs1g09256	.	.	.	.	.	.	.	.	.	.	.	.	.	.	.	.	.
Cs1g09260	Cc3g00666	Cx1g023380	Ci1g274410	.	.	.	.	.	.	.	.	.	.	.	.	.	.
Cs1g09270	Cc3g00663	Cx1g023370	Ci3g066920	Cm1g159930	Ab1g38160	.	.	.	.	.	.	.	.	.	.	.	.
Cs1g09280	Cc3g00661	Cx1g023350	Ci3g066940	Cm1g159940	Ab1g38150	.	.	.	.	.	.	.	.	.	.	.	.
Cs1g09290	Cc3g00660	Cx1g023340	.	Cm1g159950	Ab1g38181	.	.	.	.	.	.	.	.	.	.	.	.
Cs1g09300	Cc3g00659	Cx1g023330	.	Cm1g159960	Ab1g38201	.	.	.	.	.	.	.	.	.	.	.	.
Cs1g09310	.	.	.	.	.	.	.	.	.	.	.	.	.	.	.	.	.
Cs1g09320	.	.	.	.	.	.	.	.	.	.	.	.	.	.	.	.	.
Cs1g09325	.	.	.	.	.	.	.	.	.	.	.	.	.	.	.	.	.
Cs1g09330	.	Cx1g023320	.	.	.	.	.	.	.	.	.	.	.	.	.	.	.
Cs1g09340	.	.	.	.	.	.	.	.	.	.	.	.	.	.	.	.	.
Cs1g09350	.	.	.	Cm1g160020	.	.	.	.	.	.	.	.	.	.	.	.	.
Cs1g09360	.	.	.	.	.	.	.	.	.	.	.	.	.	.	.	.	.
Cs1g09363	.	.	.	.	.	.	.	.	.	.	.	.	.	.	.	.	.
Cs1g09366	.	.	.	.	.	.	.	.	.	.	.	.	.	.	.	.	.
Cs1g09370	.	Cx1g023230	.	.	Ab1g38172	.	.	.	.	.	.	.	.	.	.	.	.
Cs1g09380	.	.	.	.	.	.	.	.	.	.	.	.	.	.	.	.	.
Cs1g09390	.	.	Ci1g256690	.	.	.	.	.	.	.	.	.	.	.	.	.	.
Cs1g09400	Cc3g00656	.	.	.	.	.	.	.	.	.	.	.	.	.	.	.	.
Cs1g09402	Cc3g00655	.	.	.	.	.	.	.	.	.	.	.	.	.	.	.	.
Cs1g09404	.	.	.	.	.	.	.	.	.	.	.	.	.	.	.	.	.
Cs1g09406	.	.	.	.	.	.	.	.	.	.	.	.	.	.	.	.	.
Cs1g09408	.	.	.	.	.	.	.	.	.	.	.	.	.	.	.	.	.
Cs1g09410	.	.	.	.	.	.	.	.	.	.	.	.	.	.	.	.	.
Cs1g09420	Cc3g00653	.	.	Cm1g291440	.	.	.	.	.	.	.	.	.	.	.	.	.
Cs1g09430	.	.	.	.	.	.	.	.	.	.	.	.	.	.	.	.	.
Cs1g09440	.	.	.	.	.	Cs7g22410	.	.	.	.	.	.	.	.	.	.	.
Cs1g09450	.	Cx1g023180	.	.	Ab1g38193	.	.	.	.	.	.	.	.	.	.	.	.
Cs1g09460	.	.	.	.	.	.	.	.	.	.	.	.	.	.	.	.	.
Cs1g09470	.	.	.	.	.	.	.	.	.	.	.	.	.	.	.	.	.
Cs1g09480	Cc3g00651	Cx1g023170	.	.	Ab1g38182	.	.	.	.	.	.	.	.	.	.	.	.
Cs1g09490	Cc3g00650	Cx1g023160	.	.	Ab1g38188	.	.	.	.	.	.	.	.	.	.	.	.
Cs1g09500	Cc3g00649	Cx1g023150	Ci3g067000	.	Ab1g38203	.	.	.	.	.	.	.	.	.	.	.	.
Cs1g09510	Cc3g00648	Cx1g023140	.	.	Ab1g38152	.	.	.	.	.	.	.	.	.	.	.	.
Cs1g09520	Cc3g00647	Cx1g023130	.	.	Ab1g38146	.	.	.	.	.	.	.	.	.	.	.	.
Cs1g09530	.	.	.	.	.	.	.	.	.	.	.	.	.	.	.	.	.
Cs1g09540	.	.	.	.	.	.	.	.	.	.	.	.	.	.	.	.	.
Cs1g09550	Cc3g00644	Cx1g023100	.	.	Ab1g38199	.	.	.	.	.	.	.	.	.	.	.	.
Cs1g09560	Cc3g00643	Cx1g023090	.	.	Ab1g38195	.	.	.	.	.	.	.	.	.	.	.	.
Cs1g09570	Cc3g00642	Cx1g023080	.	.	Ab1g38171	.	.	.	.	.	.	.	.	.	.	.	.
Cs1g09575	.	.	.	.	.	.	.	.	.	.	.	.	.	.	.	.	.
Cs1g09580	.	Cx1g023070	.	.	.	.	.	.	.	.	.	.	.	.	.	.	.
Cs1g09590	.	Cx1g023060	.	.	Ab1g38165	.	.	.	.	.	.	.	.	.	.	.	.
Cs1g09600	.	.	.	.	.	.	.	.	.	.	.	.	.	.	.	.	.
Cs1g09605	.	.	.	.	.	.	.	.	.	.	.	.	.	.	.	.	.
Cs1g09610	.	Cx1g023050	Ci1g214580	Cm1g225960	.	Cs7g22420	.	.	Ci7g098030	.	Ab7g32564	.	.	.	.	.	.
Cs1g09620	.	.	.	.	.	.	.	.	.	.	.	.	.	.	.	.	.
Cs1g09630	.	Cx1g023040	Ci1g214590	Cm1g225990	Ab1g38194	Cs7g22470	.	.	Ci7g098000	Cm7g184590	.	.	.	.	.	.	.
Cs1g09635	.	.	.	.	.	.	.	.	.	.	.	.	.	.	.	.	.
Cs1g09640	.	.	Ci1g214600	.	.	.	.	.	.	.	.	.	.	.	.	.	.
Cs1g09650	.	.	.	Cm1g226020	Ab1g38155	Cs7g22510	.	.	Ci7g097990	Cm7g184620	.	.	.	.	.	.	.
Cs1g09660	.	.	Ci1g265680	.	Ab1g38192	.	.	.	.	.	.	.	.	.	.	.	.
Cs1g09665	.	.	.	.	.	.	.	.	.	.	.	.	.	.	.	.	.
Cs1g09670	.	.	.	.	.	.	.	.	.	.	.	.	.	.	.	.	.
Cs1g09680	.	.	.	.	.	.	.	.	.	.	.	.	.	.	.	.	.
Cs1g09690	.	.	.	.	.	.	.	.	.	.	.	.	.	.	.	.	.
Cs1g09700	Cc3g00637	.	.	.	.	.	.	.	.	.	.	.	.	.	.	.	.
Cs1g09710	.	Cx1g023010	.	.	.	.	.	.	.	.	.	.	.	.	.	.	.
Cs1g09720	.	.	.	.	.	.	.	.	.	.	.	.	.	.	.	.	.
Cs1g09730	.	.	.	.	.	.	.	.	.	.	.	.	.	.	.	.	.
Cs1g09740	.	.	.	.	.	.	.	.	.	.	.	.	.	.	.	.	.
Cs1g09750	.	.	.	.	.	.	.	.	.	.	.	.	.	.	.	.	.
Cs1g09760	.	.	.	.	.	.	.	.	.	.	.	.	.	.	.	.	.
Cs1g09770	.	.	.	.	.	.	.	.	.	.	.	.	.	.	.	.	.
Cs1g09780	.	Cx1g022990	.	.	.	.	.	.	.	.	.	.	.	.	.	.	.
Cs1g09790	.	Cx1g022980	Ci1g183470	.	.	.	.	.	.	.	.	.	.	.	.	.	.
Cs1g09800	.	.	.	.	.	.	.	.	.	.	.	.	.	.	.	.	.
Cs1g09810	.	.	.	.	.	.	.	.	.	.	.	.	.	.	.	.	.
Cs1g09820	.	.	.	.	.	.	.	.	.	.	.	.	.	.	.	.	.
Cs1g09830	Cc3g00633	Cx1g022940	Ci1g183480	Cm1g254090	Ab1g24706	.	.	.	.	.	.	.	.	.	.	.	.
Cs1g09840	Cc3g00632	Cx1g022930	Ci3g067100	.	.	.	.	.	.	.	.	.	.	.	.	.	.
Cs1g09850	Cc3g00631	Cx1g022920	Ci1g183500	Cm1g100570	.	.	.	.	.	.	.	.	.	.	.	.	.
Cs1g09860	.	.	.	.	.	.	.	.	.	.	.	.	.	.	.	.	.
Cs1g09870	.	.	.	.	.	.	.	.	.	.	.	.	.	.	.	.	.
Cs1g09880	.	Cx1g022880	.	.	Ab1g13250	.	.	.	.	.	.	.	.	.	.	.	.
Cs1g09890	.	.	.	.	.	.	.	.	.	.	.	.	.	.	.	.	.
Cs1g09900	.	.	.	.	Ab1g13252	.	.	.	.	.	.	.	.	.	.	.	.
Cs1g09910	Cc3g00626	Cx1g022860	Ci1g183560	Cm1g187290	Ab1g13256	.	.	.	.	.	.	.	.	.	.	.	.
Cs1g09920	Cc3g00625	Cx1g022850	Ci1g183570	Cm1g187280	Ab1g13249	.	.	.	.	.	.	.	.	.	.	.	.
Cs1g09930	.	.	Ci1g183580	.	.	.	.	.	.	.	.	.	.	.	.	.	.
Cs1g09940	Cc3g00624	Cx1g022830	Ci1g183590	.	.	.	.	.	.	.	.	.	.	.	.	.	.
Cs1g09950	.	.	.	.	.	.	.	.	.	.	.	.	.	.	.	.	.
Cs1g09960	Cc3g00623	Cx1g022820	Ci1g183600	Cm1g187160	Ab1g13251	.	.	.	.	.	.	.	.	.	.	.	.
Cs1g09970	Cc3g00622	Cx1g022810	Ci1g183610	Cm1g187150	Ab1g13253	.	.	.	.	.	.	.	.	.	.	.	.
Cs1g09980	Cc3g00619	Cx1g022770	Ci1g183650	Cm1g187120	Ab1g29024	.	.	.	.	.	.	.	.	.	.	.	.
Cs1g09990	Cc3g00618	Cx1g022760	Ci1g183660	Cm1g187110	Ab1g29023	.	.	.	.	.	.	.	.	.	.	.	.
Cs1g09995	.	.	.	.	.	.	.	.	.	.	.	.	.	.	.	.	.
Cs1g10000	.	.	.	.	.	.	.	.	.	.	.	.	.	.	.	.	.
Cs1g10010	Cc3g00616	Cx1g022750	Ci1g183670	.	Ab1g29022	.	.	.	.	.	.	.	.	.	.	.	.
Cs1g10020	.	.	.	.	.	.	.	.	.	.	.	.	.	.	.	.	.
Cs1g10030	.	.	.	.	.	.	.	.	.	.	.	.	.	.	.	.	.
Cs1g10040	Cc3g00614	Cx1g022720	Ci1g183690	.	Ab1g19044	.	.	.	.	.	.	.	.	.	.	.	.
Cs1g10050	.	.	.	.	.	.	.	.	.	.	.	.	.	.	.	.	.
Cs1g10060	.	.	.	.	.	.	.	.	.	.	.	.	.	.	.	.	.
Cs1g10070	Cc3g00613	Cx1g022710	Ci1g183700	.	Ab1g21989	.	.	.	.	.	.	.	.	.	.	.	.
Cs1g10080	.	.	.	.	.	.	.	.	.	.	.	.	.	.	.	.	.
Cs1g10090	.	Cx1g022690	Ci1g268360	.	Ab1g26685	.	.	.	.	.	.	.	.	.	.	.	.
Cs1g10100	.	.	.	.	.	.	.	.	.	.	.	.	.	.	.	.	.
Cs1g10110	Cc3g00610	.	.	.	.	.	.	.	.	.	.	.	.	.	.	.	.
Cs1g10115	.	.	.	.	.	.	.	.	.	.	.	.	.	.	.	.	.
Cs1g10120	.	.	.	.	.	.	.	.	.	.	.	.	.	.	.	.	.
Cs1g10130	Cc3g00609	.	.	.	.	.	.	.	.	.	.	.	.	.	.	.	.
Cs1g10140	Cc3g00608	.	.	.	.	.	.	.	.	.	.	.	.	.	.	.	.
Cs1g10150	Cc3g00607	.	.	.	.	.	.	.	.	.	.	.	.	.	.	.	.
Cs1g10160	.	.	.	.	.	.	.	.	.	.	.	.	.	.	.	.	.
Cs1g10170	Cc3g00606	.	Ci3g067440	.	.	.	.	.	.	.	.	.	.	.	.	.	.
Cs1g10180	.	.	Ci1g244210	.	.	.	.	.	.	.	.	.	.	.	.	.	.
Cs1g10190	.	.	.	.	.	.	.	.	.	.	.	.	.	.	.	.	.
Cs1g10200	.	.	.	.	.	.	.	.	.	.	.	.	.	.	.	.	.
Cs1g10210	.	.	.	.	.	.	.	.	.	.	.	.	.	.	.	.	.
Cs1g10220	.	Cx1g021580	.	.	.	.	.	.	.	.	.	.	.	.	.	.	.
Cs1g10230	.	.	.	.	.	.	.	.	.	.	.	.	.	.	.	.	.
Cs1g10240	Cc7g00574	Cx1g021600	.	.	.	.	.	.	.	.	.	.	.	.	.	.	.
Cs1g10245	.	.	.	.	.	.	.	.	.	.	.	.	.	.	.	.	.
Cs1g10250	Cc7g00576	Cx1g021620	.	.	.	.	.	.	.	.	.	.	.	.	.	.	.
Cs1g10260	.	.	Ci1g275590	.	.	.	.	.	.	.	.	.	.	.	.	.	.
Cs1g10270	.	.	.	.	.	.	.	.	.	.	.	.	.	.	.	.	.
Cs1g10280	Cc7g00577	.	.	.	.	.	.	.	.	.	.	.	.	.	.	.	.
Cs1g10290	.	.	.	.	.	.	.	.	.	.	.	.	.	.	.	.	.
Cs1g10300	.	.	Ci1g290020	.	.	.	.	.	.	.	.	.	.	.	.	.	.
Cs1g10310	.	.	.	.	.	.	.	.	.	.	.	.	.	.	.	.	.
Cs1g10320	.	.	.	.	.	.	.	.	.	.	.	.	.	.	.	.	.
Cs1g10330	.	.	.	.	.	.	.	.	.	.	.	.	.	.	.	.	.
Cs1g10340	.	Cx1g021890	.	.	.	.	.	.	.	.	.	.	.	.	.	.	.
Cs1g10350	.	.	.	Cm1g138260	.	.	.	.	.	.	.	.	.	.	.	.	.
Cs1g10360	.	.	.	.	.	.	.	.	.	.	.	.	.	.	.	.	.
Cs1g10370	Cc7g00582	.	Ci1g268050	.	.	.	.	.	.	.	.	.	.	.	.	.	.
Cs1g10380	Cc7g00584	Cx1g021900	Ci1g268060	.	.	.	.	.	.	.	.	.	.	.	.	.	.
Cs1g10389	.	.	.	.	.	.	.	.	.	.	.	.	.	.	.	.	.
Cs1g10390	.	.	.	.	.	.	.	.	.	.	.	.	.	.	.	.	.
Cs1g10400	.	.	.	.	.	.	.	.	.	.	.	.	.	.	.	.	.
Cs1g10405	.	.	.	.	.	.	.	.	.	.	.	.	.	.	.	.	.
Cs1g10410	.	.	.	.	.	.	.	.	.	.	.	.	.	.	.	.	.
Cs1g10420	.	.	.	.	.	.	.	.	.	.	.	.	.	.	.	.	.
Cs1g10425	.	.	.	.	.	.	.	.	.	.	.	.	.	.	.	.	.
Cs1g10430	.	.	.	.	.	.	.	.	.	.	.	.	.	.	.	.	.
Cs1g10440	.	.	Ci1g210120	.	.	.	.	.	.	.	.	.	.	.	.	.	.
Cs1g10450	.	.	.	.	.	.	.	.	.	.	.	.	.	.	.	.	.
Cs1g10460	.	.	.	.	.	.	.	.	.	.	.	.	.	.	.	.	.
Cs1g10470	.	.	.	.	.	.	.	.	.	.	.	.	.	.	.	.	.
Cs1g10480	.	.	Ci1g210140	.	Ab1g29676	.	.	.	.	.	.	.	.	.	.	.	.
Cs1g10490	.	.	.	.	.	.	.	.	.	.	.	.	.	.	.	.	.
Cs1g10500	.	.	.	.	.	.	.	.	.	.	.	.	.	.	.	.	.
Cs1g10510	.	.	.	.	.	.	.	.	.	.	.	.	.	.	.	.	.
Cs1g10520	Cc1g01769	Cx5g012610	Ci1g255730	.	.	.	.	.	.	.	.	.	.	.	.	.	.
Cs1g10530	Cc1g01770	.	Ci1g272290	Cm1g138190	Ab1g37257	.	.	.	.	.	.	.	.	.	.	.	.
Cs1g10540	.	.	.	.	.	.	.	.	.	.	.	.	.	.	.	.	.
Cs1g10550	Cc1g01772	Cx5g012590	.	Cm1g138060	.	.	.	.	.	.	.	.	.	.	.	.	.
Cs1g10560	Cc1g01774	.	.	.	.	.	.	.	.	.	.	.	.	.	.	.	.
Cs1g10570	Cc1g01775	Cx5g012580	.	.	.	.	.	.	.	.	.	.	.	.	.	.	.
Cs1g10580	.	.	.	.	.	.	.	.	.	.	.	.	.	.	.	.	.
Cs1g10590	Cc1g01776	Cx5g012570	Ci1g207810	.	.	.	.	.	.	.	.	.	.	.	.	.	.
Cs1g10600	Cc1g01777	Cx5g012560	Ci1g207820	.	.	.	.	.	.	.	.	.	.	.	.	.	.
Cs1g10610	Cc1g01778	Cx5g012550	Ci1g207830	.	.	.	.	.	.	.	.	.	.	.	.	.	.
Cs1g10620	Cc1g01780	Cx5g012540	Ci1g207850	.	.	.	.	.	.	.	.	.	.	.	.	.	.
Cs1g10630	Cc1g01782	Cx5g012530	Ci1g207860	.	.	.	.	.	.	.	.	.	.	.	.	.	.
Cs1g10640	Cc1g01783	Cx5g012520	Ci1g207870	.	.	.	.	.	.	.	.	.	.	.	.	.	.
Cs1g10650	Cc1g01784	Cx5g012510	Ci1g207880	.	.	.	.	.	.	.	.	.	.	.	.	.	.
Cs1g10660	Cc1g01785	Cx5g012500	Ci1g207900	.	Ab1g28791	.	.	.	.	.	.	.	.	.	.	.	.
Cs1g10670	Cc1g01786	Cx5g012490	Ci1g207910	.	Ab1g28848	.	.	.	.	.	.	.	.	.	.	.	.
Cs1g10680	.	Cx5g012480	Ci1g207920	.	.	.	.	.	.	.	.	.	.	.	.	.	.
Cs1g10690	Cc1g01787	Cx5g012470	Ci1g207930	.	.	.	.	.	.	.	.	.	.	.	.	.	.
Cs1g10700	Cc1g01788	Cx5g012460	Ci1g207940	.	.	.	.	.	.	.	.	.	.	.	.	.	.
Cs1g10710	Cc1g01789	Cx5g012450	Ci1g207950	.	.	.	.	.	.	.	.	.	.	.	.	.	.
Cs1g10720	.	Cx5g012440	Ci1g207980	.	.	.	.	.	.	.	.	.	.	.	.	.	.
Cs1g10730	.	Cx5g012430	.	.	.	.	.	.	.	.	.	.	.	.	.	.	.
Cs1g10740	Cc1g01795	Cx5g012400	Ci1g208020	.	.	.	.	.	.	.	.	.	.	.	.	.	.
Cs1g10745	.	.	.	.	.	.	.	.	.	.	.	.	.	.	.	.	.
Cs1g10750	Cc7g00604	Cx1g022010	.	.	.	.	.	.	.	.	.	.	.	.	.	.	.
Cs1g10760	Cc1g01796	Cx5g012360	Ci1g208030	.	.	.	.	.	.	.	.	.	.	.	.	.	.
Cs1g10770	Cc1g01797	.	.	.	.	.	.	.	.	.	.	.	.	.	.	.	.
Cs1g10780	.	.	.	.	Ab1g28799	.	.	.	.	.	.	.	.	.	.	.	.
Cs1g10790	.	.	.	.	.	.	.	.	.	.	.	.	.	.	.	.	.
Cs1g10800	.	.	.	.	.	.	.	.	.	.	.	.	.	.	.	.	.
Cs1g10810	.	.	.	.	.	.	.	.	.	.	.	.	.	.	.	.	.
Cs1g10820	.	.	.	.	.	.	.	.	.	.	.	.	.	.	.	.	.
Cs1g10830	.	.	.	.	.	.	.	.	.	.	.	.	.	.	.	.	.
Cs1g10840	.	.	.	.	.	.	.	.	.	.	.	.	.	.	.	.	.
Cs1g10850	Cc1g01842	Cx5g012270	.	.	Ab1g28520	.	.	.	.	.	.	.	.	.	.	.	.
Cs1g10860	.	.	.	.	.	.	.	.	.	.	.	.	.	.	.	.	.
Cs1g10870	.	.	.	.	.	.	.	.	.	.	.	.	.	.	.	.	.
Cs1g10875	.	.	.	.	.	.	.	.	.	.	.	.	.	.	.	.	.
Cs1g10880	.	.	.	.	.	.	.	.	.	.	.	.	.	.	.	.	.
Cs1g10890	.	.	.	.	.	.	.	.	.	.	.	.	.	.	.	.	.
Cs1g10900	.	.	.	.	.	.	.	.	.	.	.	.	.	.	.	.	.
Cs1g10910	.	.	.	Cm1g137990	.	.	.	.	.	.	.	.	.	.	.	.	.
Cs1g10920	.	.	.	Cm1g137970	.	.	.	.	.	.	.	.	.	.	.	.	.
Cs1g10925	.	.	.	.	.	.	.	.	.	.	.	.	.	.	.	.	.
Cs1g10930	.	.	.	.	.	.	.	.	.	.	.	.	.	.	.	.	.
Cs1g10940	.	.	.	Cm1g137960	.	.	.	.	.	.	.	.	.	.	.	.	.
Cs1g10950	.	.	.	.	.	.	.	.	.	.	.	.	.	.	.	.	.
Cs1g10960	Cc1g01651	.	.	Cm1g137950	.	.	.	.	.	.	.	.	.	.	.	.	.
Cs1g10970	.	.	Ci1g261400	.	.	.	.	.	.	.	.	.	.	.	.	.	.
Cs1g10980	.	.	.	.	.	.	.	.	.	.	.	.	.	.	.	.	.
Cs1g10990	.	.	Ci1g151380	Cm1g137940	.	.	.	.	.	.	.	.	.	.	.	.	.
Cs1g11000	.	.	.	.	.	.	.	.	.	.	.	.	.	.	.	.	.
Cs1g11010	.	.	.	.	.	.	.	.	.	.	.	.	.	.	.	.	.
Cs1g11020	.	Cx1g019980	Ci1g151410	Cm1g058180	.	.	.	.	.	.	.	.	.	.	.	.	.
Cs1g11030	.	.	.	.	.	.	.	.	.	.	.	.	.	.	.	.	.
Cs1g11040	.	.	.	Cm1g058200	.	.	.	.	.	.	.	.	.	.	.	.	.
Cs1g11050	.	.	.	Cm1g058220	.	.	.	.	.	.	.	.	.	.	.	.	.
Cs1g11060	.	.	.	.	.	.	.	.	.	.	.	.	.	.	.	.	.
Cs1g11070	.	.	.	Cm1g058230	.	.	.	.	.	.	.	.	.	.	.	.	.
Cs1g11080	.	.	.	Cm1g077050	.	.	.	.	.	.	.	.	.	.	.	.	.
Cs1g11090	Cc1g01647	.	.	.	.	.	.	.	.	.	.	.	.	.	.	.	.
Cs1g11100	Cc1g01646	.	.	.	Ab1g16805	.	.	.	.	.	.	.	.	.	.	.	.
Cs1g11110	Cc1g01645	.	.	.	.	.	.	.	.	.	.	.	.	.	.	.	.
Cs1g11120	.	.	.	.	.	.	.	.	.	.	.	.	.	.	.	.	.
Cs1g11130	.	.	.	.	.	.	.	.	.	.	.	.	.	.	.	.	.
Cs1g11140	Cc1g01644	.	.	.	.	.	.	.	.	.	.	.	.	.	.	.	.
Cs1g11150	Cc1g01643	.	.	.	.	.	.	.	.	.	.	.	.	.	.	.	.
Cs1g11160	Cc1g01642	.	.	.	.	.	.	.	.	.	.	.	.	.	.	.	.
Cs1g11170	Cc1g01641	.	.	.	.	.	.	.	.	.	.	.	.	.	.	.	.
Cs1g11180	.	.	.	.	.	.	.	.	.	.	.	.	.	.	.	.	.
Cs1g11190	Cc1g01640	.	.	.	Ab1g16981	.	.	.	.	.	.	.	.	.	.	.	.
Cs1g11200	Cc1g01639	.	.	.	Ab1g17045	.	.	.	.	.	.	.	.	.	.	.	.
Cs1g11210	Cc1g01638	.	.	.	.	.	.	.	.	.	.	.	.	.	.	.	.
Cs1g11220	.	.	.	.	Ab1g16830	.	.	.	.	.	.	.	.	.	.	.	.
Cs1g11225	.	.	.	.	.	.	.	.	.	.	.	.	.	.	.	.	.
Cs1g11230	.	.	.	.	.	.	.	.	.	.	.	.	.	.	.	.	.
Cs1g11240	.	.	.	.	.	.	.	.	.	.	.	.	.	.	.	.	.
Cs1g11250	.	.	.	.	.	.	.	.	.	.	.	.	.	.	.	.	.
Cs1g11260	.	.	.	.	.	.	.	.	.	.	.	.	.	.	.	.	.
Cs1g11270	.	.	.	.	.	.	.	.	.	.	.	.	.	.	.	.	.
Cs1g11280	.	.	.	.	.	.	.	.	.	.	.	.	.	.	.	.	.
Cs1g11290	.	.	.	.	.	.	.	.	.	.	.	.	.	.	.	.	.
Cs1g11300	.	.	.	.	.	.	.	.	.	.	.	.	.	.	.	.	.
Cs1g11310	.	.	.	.	.	.	.	.	.	.	.	.	.	.	.	.	.
Cs1g11320	.	.	.	.	.	.	.	.	.	.	.	.	.	.	.	.	.
Cs1g11330	.	.	.	.	.	.	.	.	.	.	.	.	.	.	.	.	.
Cs1g11340	Cc1g01552	Cx1g020480	.	Cm1g076590	.	.	.	.	.	.	.	.	.	.	.	.	.
Cs1g11350	Cc1g01553	Cx1g020470	.	Cm1g076600	.	.	.	.	.	.	.	.	.	.	.	.	.
Cs1g11360	Cc1g01554	Cx1g020460	.	Cm1g076610	.	.	.	.	.	.	.	.	.	.	.	.	.
Cs1g11370	.	.	.	.	.	.	.	.	.	.	.	.	.	.	.	.	.
Cs1g11380	Cc1g01555	Cx1g020450	.	Cm1g076620	Ab1g16747	.	.	.	.	.	.	.	.	.	.	.	.
Cs1g11390	.	.	.	.	.	.	.	.	.	.	.	.	.	.	.	.	.
Cs1g11400	.	.	.	.	Ab1g10637	.	.	.	.	.	.	.	.	.	.	.	.
Cs1g11410	.	.	.	.	.	.	.	.	.	.	.	.	.	.	.	.	.
Cs1g11420	Cc1g01561	Cx1g020430	Ci1g270920	Cm1g076630	.	.	.	.	.	.	.	.	.	.	.	.	.
Cs1g11430	.	.	.	.	.	.	.	.	.	.	.	.	.	.	.	.	.
Cs1g11440	Cc1g01564	Cx1g020410	Ci1g270950	Cm1g076640	.	.	.	.	.	.	.	.	.	.	.	.	.
Cs1g11450	Cc1g01565	Cx1g020400	Ci1g270970	Cm1g076650	.	.	.	.	.	.	.	.	.	.	.	.	.
Cs1g11460	.	.	.	.	.	.	.	.	.	.	.	.	.	.	.	.	.
Cs1g11470	Cc1g01570	Cx1g020370	.	Cm1g076670	Ab1g16862	.	.	.	.	.	.	.	.	.	.	.	.
Cs1g11480	Cc1g01571	Cx1g020360	.	Cm1g076820	.	.	.	.	.	.	.	.	.	.	.	.	.
Cs1g11490	Cc1g01572	Cx1g020350	.	Cm1g076680	Ab1g27499	.	.	.	.	.	.	.	.	.	.	.	.
Cs1g11500	.	.	.	.	.	.	.	.	.	.	.	.	.	.	.	.	.
Cs1g11510	Cc1g01573	Cx1g020210	.	Cm1g076770	Ab1g27496	.	.	.	.	.	.	.	.	.	.	.	.
Cs1g11520	Cc1g01574	Cx1g020220	.	Cm1g076750	Ab1g27534	.	.	.	.	.	.	.	.	.	.	.	.
Cs1g11530	Cc1g01575	Cx1g020320	.	Cm1g076730	Ab1g27531	.	.	.	.	.	.	.	.	.	.	.	.
Cs1g11540	.	Cx1g020310	.	.	.	.	.	.	.	.	.	.	.	.	.	.	.
Cs1g11550	.	Cx1g020240	.	Cm1g076710	Ab1g27507	.	.	.	.	.	.	.	.	.	.	.	.
Cs1g11560	Cc1g01576	Cx1g020270	.	Cm1g076720	Ab1g27521	.	.	.	.	.	.	.	.	.	.	.	.
Cs1g11570	Cc1g01577	Cx1g020270	.	Cm1g076730	Ab1g27484	.	.	.	.	.	.	.	.	.	.	.	.
Cs1g11580	.	.	.	.	.	.	.	.	.	.	.	.	.	.	.	.	.
Cs1g11590	.	.	.	.	.	.	.	.	.	.	.	.	.	.	.	.	.
Cs1g11595	.	.	.	.	.	.	.	.	.	.	.	.	.	.	.	.	.
Cs1g11600	Cc1g01578	Cx1g020300	.	Cm1g076750	Ab1g27531	.	.	.	.	.	.	.	.	.	.	.	.
Cs1g11610	.	Cx1g020310	Ci1g290050	Cm1g076670	.	.	.	.	.	.	.	.	.	.	.	.	.
Cs1g11620	Cc1g01581	Cx1g020240	.	Cm1g076790	Ab1g27502	.	.	.	.	.	.	.	.	.	.	.	.
Cs1g11630	Cc1g01582	Cx1g020230	.	Cm1g273650	Ab1g27510	.	.	.	.	.	.	.	.	.	.	.	.
Cs1g11640	Cc1g01583	Cx1g020350	.	Cm1g076830	Ab1g27499	.	.	.	.	.	.	.	.	.	.	.	.
Cs1g11650	.	.	.	.	.	.	.	.	.	.	.	.	.	.	.	.	.
Cs1g11660	.	.	.	.	.	.	.	.	.	.	.	.	.	.	.	.	.
Cs1g11670	Cc1g01585	.	.	Cm1g076850	Ab1g27532	.	.	.	.	.	.	.	.	.	.	.	.
Cs1g11680	.	.	.	Cm1g076860	Ab1g27501	.	.	.	.	.	.	.	.	.	.	.	.
Cs1g11690	Cc1g01587	.	.	Cm1g076880	Ab1g27495	.	.	.	.	.	.	.	.	.	.	.	.
Cs1g11700	Cc1g01588	.	Ci1g283800	Cm1g076900	Ab1g27528	.	.	.	.	.	.	.	.	.	.	.	.
Cs1g11710	.	.	.	.	.	.	.	.	.	.	.	.	.	.	.	.	.
Cs1g11720	Cc1g01590	.	.	Cm1g076910	Ab1g27524	.	.	.	.	.	.	.	.	.	.	.	.
Cs1g11730	.	Cx1g020430	.	.	.	.	.	.	.	.	.	.	.	.	.	.	.
Cs1g11740	Cc1g01592	Cx4g001760	.	Cm1g076920	Ab1g27529	.	.	.	.	.	.	.	.	.	.	.	.
Cs1g11750	Cc1g01593	.	.	Cm1g076940	Ab1g27509	.	.	.	.	.	.	.	.	.	.	.	.
Cs1g11760	Cc1g01594	.	.	Cm1g076950	Ab1g27498	.	.	.	.	.	.	.	.	.	.	.	.
Cs1g11770	.	.	.	.	Ab1g27517	.	.	.	.	.	.	.	.	.	.	.	.
Cs1g11780	.	.	.	Cm1g057850	.	.	.	.	.	.	.	.	.	.	.	.	.
Cs1g11790	.	.	.	.	.	.	.	.	.	.	.	.	.	.	.	.	.
Cs1g11800	.	.	.	.	.	.	.	.	.	.	.	.	.	.	.	.	.
Cs1g11810	Cc1g01600	.	.	Cm1g077040	Ab1g27482	.	.	.	.	.	.	.	.	.	.	.	.
Cs1g11820	.	.	Ci1g245020	.	Ab1g27494	Cs7g05660	Cc4g00209	Cx4g002060	Ci7g068770	.	Ab1g17011	.	.	.	.	.	.
Cs1g11830	.	.	.	.	.	.	.	.	.	.	.	.	.	.	.	.	.
Cs1g11840	Cc1g01602	.	.	Cm1g077070	Ab1g27488	.	.	.	.	.	.	.	.	.	.	.	.
Cs1g11850	Cc1g01603	.	Ci1g245050	Cm1g077090	Ab1g27497	.	.	.	.	.	.	.	.	.	.	.	.
Cs1g11860	Cc1g01604	.	.	Cm1g077100	Ab1g27533	.	.	.	.	.	.	.	.	.	.	.	.
Cs1g11870	Cc1g01605	.	.	.	.	.	.	.	.	.	.	.	.	.	.	.	.
Cs1g11880	Cc1g01606	.	.	Cm1g077110	Ab1g27538	.	.	.	.	.	.	.	.	.	.	.	.
Cs1g11890	Cc1g01610	.	.	Cm1g077120	.	.	.	.	.	.	.	.	.	.	.	.	.
Cs1g11900	.	.	.	.	.	.	.	.	.	.	.	.	.	.	.	.	.
Cs1g11910	.	.	.	.	.	.	.	.	.	.	.	.	.	.	.	.	.
Cs1g11920	.	.	.	.	.	.	.	.	.	.	.	.	.	.	.	.	.
Cs1g11930	.	.	.	.	.	.	.	.	.	.	.	.	.	.	.	.	.
Cs1g11940	Cc1g01625	.	.	.	Ab1g27486	.	.	.	.	.	.	.	.	.	.	.	.
Cs1g11950	.	.	.	.	.	.	.	.	.	.	.	.	.	.	.	.	.
Cs1g11960	.	.	.	.	.	.	.	.	.	.	.	.	.	.	.	.	.
Cs1g11970	.	.	.	.	.	.	.	.	.	.	.	.	.	.	.	.	.
Cs1g11980	.	.	.	.	.	.	.	.	.	.	.	.	.	.	.	.	.
Cs1g11990	.	.	.	.	.	.	.	.	.	.	.	.	.	.	.	.	.
Cs1g12000	Cc1g01627	Cx1g020920	.	Cm1g138190	Ab1g24325	.	.	.	.	.	.	.	.	.	.	.	.
Cs1g12010	.	.	.	.	.	.	.	.	.	.	.	.	.	.	.	.	.
Cs1g12020	.	.	.	.	.	.	.	.	.	.	.	.	.	.	.	.	.
Cs1g12030	Cc1g01466	Cx1g018600	Ci1g274860	.	Ab1g32954	.	.	.	.	.	.	.	.	.	.	.	.
Cs1g12040	.	.	.	.	Ab1g31935	.	.	.	.	.	.	.	.	.	.	.	.
Cs1g12050	.	.	.	.	.	.	.	.	.	.	.	.	.	.	.	.	.
Cs1g12060	Cc1g01461	Cx1g018490	.	Cm1g254420	Ab1g32940	.	.	.	.	.	.	.	.	.	.	.	.
Cs1g12070	Cc1g01458	Cx1g018480	Ci1g274880	Cm1g254440	Ab1g32977	.	.	.	.	.	.	.	.	.	.	.	.
Cs1g12080	Cc1g01454	Cx1g018350	.	Cm1g254450	Ab1g32968	.	.	.	.	.	.	.	.	.	.	.	.
Cs1g12090	.	Cx1g018240	Ci1g274890	Cm1g254460	.	.	.	.	.	.	.	.	.	.	.	.	.
Cs1g12100	.	.	.	.	.	.	.	.	.	.	.	.	.	.	.	.	.
Cs1g12110	.	Cx1g018150	Ci1g274900	Cm1g280280	Ab1g32960	.	.	.	.	.	.	.	.	.	.	.	.
Cs1g12120	.	Cx1g018100	.	Cm1g280290	.	.	.	.	.	.	.	.	.	.	.	.	.
Cs1g12130	.	.	.	.	Ab1g13605	.	.	.	.	.	.	.	.	.	.	.	.
Cs1g12140	.	.	.	.	.	.	.	.	.	.	.	.	.	.	.	.	.
Cs1g12150	.	.	Ci1g274910	.	.	.	.	.	.	.	.	.	.	.	.	.	.
Cs1g12160	.	.	Ci7g068570	.	.	.	.	.	.	.	.	.	.	.	.	.	.
Cs1g12170	.	.	.	.	.	.	.	.	.	.	.	.	.	.	.	.	.
Cs1g12180	.	.	.	.	.	.	.	.	.	.	.	.	.	.	.	.	.
Cs1g12190	.	.	.	.	.	.	.	.	.	.	.	.	.	.	.	.	.
Cs1g12200	.	Cx1g018060	.	Cm1g257610	Ab1g32979	.	.	.	.	.	.	.	.	.	.	.	.
Cs1g12210	.	.	.	.	.	.	.	.	.	.	.	.	.	.	.	.	.
Cs1g12220	Cc1g01449	Cx1g018020	Ci1g274940	.	.	.	.	.	.	.	.	.	.	.	.	.	.
Cs1g12230	.	Cx1g017990	.	Cm1g257630	.	.	.	.	.	.	.	.	.	.	.	.	.
Cs1g12240	Cc1g01432	Cx1g017980	Ci1g293600	Cm1g257640	Ab1g32992	.	.	.	.	.	.	.	.	.	.	.	.
Cs1g12245	Cc1g01425	Cx1g017960	Ci1g279180	Cm1g257660	Ab1g32959	.	.	.	.	.	.	.	.	.	.	.	.
Cs1g12250	Cc1g01424	Cx1g017950	Ci1g279190	Cm1g257670	Ab1g32985	Cs7g05610	Cc4g00213	Cx4g002110	Ci7g068820	Cm1g257670	Ab1g16998	.	.	.	.	.	.
Cs1g12260	Cc1g01423	Cx1g017940	Ci1g279200	Cm1g235650	Ab1g32957	Cs4g18180	Cc4g00535	Cx4g006990	Ci4g176320	Cm4g147200	Ab4g31760	.	.	.	.	.	.
Cs1g12270	Cc1g01422	Cx1g017930	Ci1g279210	Cm1g235670	Ab1g32995	.	.	.	.	.	.	.	.	.	.	.	.
Cs1g12280	Cc1g01421	Cx1g017920	Ci1g279220	.	Ab1g32937	.	.	.	.	.	.	.	.	.	.	.	.
Cs1g12290	Cc1g01420	Cx1g017910	Ci1g279230	Cm1g235680	Ab1g32934	.	.	.	.	.	.	.	.	.	.	.	.
Cs1g12300	.	.	.	.	.	.	.	.	.	.	.	.	.	.	.	.	.
Cs1g12310	Cc1g01416	Cx1g017850	Ci6g117750	Cm1g235700	.	.	.	.	.	.	.	.	.	.	.	.	.
Cs1g12320	Cc1g01415	Cx1g017840	Ci6g117740	Cm1g235710	Ab1g32922	.	.	.	.	.	.	.	.	.	.	.	.
Cs1g12330	.	Cx4g002140	Ci6g117730	Cm1g235720	Ab1g32962	Cs7g05580	Cc4g00216	Cx4g002140	Ci7g068850	Cm1g235720	Ab1g16989	.	.	.	.	.	.
Cs1g12340	.	.	.	.	.	.	.	.	.	.	.	.	.	.	.	.	.
Cs1g12350	.	.	.	.	.	.	.	.	.	.	.	.	.	.	.	.	.
Cs1g12360	Cc1g01413	Cx1g017770	Ci6g117700	Cm1g235760	Ab1g32958	Cs7g05560	Cc4g00218	Cx4g002160	Ci7g068870	Cm1g235760	Ab1g16936	.	.	.	.	.	.
Cs1g12370	Cc1g01412	Cx1g017760	Ci6g117690	Cm1g235770	Ab1g32981	.	.	.	.	.	.	.	.	.	.	.	.
Cs1g12380	.	.	.	.	.	.	.	.	.	.	.	.	.	.	.	.	.
Cs1g12390	.	.	.	.	.	.	.	.	.	.	.	.	.	.	.	.	.
Cs1g12400	Cc1g01409	Cx1g017730	Ci6g117640	Cm1g185160	Ab1g32928	.	.	.	.	.	.	.	.	.	.	.	.
Cs1g12410	Cc1g01408	Cx1g017720	Ci6g117630	Cm1g185170	Ab1g32984	.	.	.	.	.	.	.	.	.	.	.	.
Cs1g12415	.	.	.	.	.	.	.	.	.	.	.	.	.	.	.	.	.
Cs1g12420	Cc1g01407	Cx1g017710	Ci6g117610	Cm1g185180	Ab1g32944	.	.	.	.	.	.	.	.	.	.	.	.
Cs1g12430	Cc1g01406	Cx1g017700	Ci6g117600	Cm1g185190	Ab1g33001	.	.	.	.	.	.	.	.	.	.	.	.
Cs1g12440	Cc1g01405	Cx1g017690	Ci6g117590	Cm1g185200	Ab1g32996	.	.	.	.	.	.	.	.	.	.	.	.
Cs1g12450	.	.	.	.	.	.	.	.	.	.	.	.	.	.	.	.	.
Cs1g12460	Cc1g01404	Cx1g017660	Ci6g117550	Cm1g185230	Ab1g32952	Cs4g18160	Cc4g00537	Cx4g007010	Ci4g176290	Cm4g147180	Ab4g31757	.	.	.	.	.	.
Cs1g12470	Cc1g01403	Cx1g017650	Ci6g117540	Cm1g185240	Ab1g32943	Cs4g18140	Cc4g00540	Cx4g007030	Ci4g176270	Cm4g147160	Ab4g31846	.	.	.	.	.	.
Cs1g12480	Cc1g01402	Cx1g017640	Ci6g117530	Cm1g185250	Ab1g33009	Cs4g18100	Cc4g00545	Cx4g007070	Ci4g176240	Cm4g147110	Ab4g31857	.	.	.	.	.	.
Cs1g12490	Cc1g01401	Cx1g017630	.	Cm1g185260	Ab1g32988	.	.	.	.	.	.	.	.	.	.	.	.
Cs1g12500	Cc1g01400	Cx1g017620	.	Cm1g185280	Ab1g32953	.	.	.	.	.	.	.	.	.	.	.	.
Cs1g12505	Cc1g01399	Cx1g017600	.	Cm1g185290	Ab1g32964	Cs4g18060	Cc4g00549	Cx4g007120	.	Cm4g147060	Ab4g31780	.	.	.	.	.	.
Cs1g12510	Cc1g01396	Cx1g017580	.	.	Ab1g32972	Cs4g18000	Cc4g00557	Cx4g007190	Ci4g195040	Cm4g089040	Ab4g31742	.	.	.	.	.	.
Cs1g12520	.	Cx4g002280	.	Cm1g185310	.	Cs7g05410	Cc4g00230	Cx4g002280	Ci7g069010	Cm4g089040	.	.	.	.	.	.	.
Cs1g12530	.	Cx1g017560	.	Cm1g185320	Ab1g32947	.	.	.	.	.	.	.	.	.	.	.	.
Cs1g12540	.	.	.	.	.	.	.	.	.	.	.	.	.	.	.	.	.
Cs1g12550	Cc1g01395	Cx1g017550	Ci1g264600	Cm1g185330	Ab1g32950	Cs4g17980	Cc4g00559	.	.	.	.	.	.	.	.	.	.
Cs1g12560	Cc1g01394	Cx1g017540	.	Cm1g185340	Ab1g32963	.	.	.	.	.	.	.	.	.	.	.	.
Cs1g12570	Cc1g01393	Cx1g017530	Ci7g069040	Cm1g185350	Ab1g32931	Cs7g05380	Cc4g00233	Cx4g002300	Ci7g069040	.	Ab7g27840	Cs4g17930	Cc4g00563	.	Ci4g194990	.	Ab4g31844
Cs1g12580	Cc1g01392	Cx1g017510	.	Cm1g185360	Ab1g32986	Cs4g17900	Cc4g00566	Cx4g007270	Ci4g194970	Cm4g088980	Ab4g31848	.	.	.	.	.	.
Cs1g12590	.	Cx1g017500	.	.	.	.	.	.	.	.	.	.	.	.	.	.	.
Cs1g12600	Cc1g01391	Cx1g017480	Ci7g069050	Cm1g185370	Ab1g32939	Cs7g05370	Cc4g00234	Cx4g002320	Ci7g069050	Cm1g185370	Ab7g27827	.	.	.	.	.	.
Cs1g12610	.	.	.	.	.	.	.	.	.	.	.	.	.	.	.	.	.
Cs1g12620	Cc1g01390	Cx1g017470	.	Cm1g185380	Ab1g32955	Cs7g05360	Cc4g00235	Cx4g002330	Ci7g069060	Cm1g185380	Ab7g27809	Cs4g17880	Cc4g00568	Cx4g007290	Ci4g194940	Cm4g088950	.
Cs1g12630	Cc1g01389	Cx1g017450	Ci1g289370	Cm1g185420	Ab1g32925	.	.	.	.	.	.	.	.	.	.	.	.
Cs1g12640	Cc1g01388	Cx1g017440	Ci1g289380	Cm1g110850	Ab1g32926	Cs7g05340	Cc4g00236	Cx4g002350	Ci7g069080	Cm4g088940	Ab7g27853	Cs4g17870	Cc4g00569	Cx4g007300	Ci4g194910	Cm4g088940	Ab4g32398
Cs1g12650	Cc1g01387	Cx1g017430	Ci1g289390	Cm1g110840	Ab1g32942	Cs4g17830	Cc4g00572	Cx4g007330	Ci4g194880	Cm4g088910	Ab4g32184	.	.	.	.	.	.
Cs1g12660	Cc1g01386	Cx1g017420	.	Cm1g110830	.	.	.	.	.	.	.	.	.	.	.	.	.
Cs1g12670	Cc1g01385	Cx1g017410	Ci1g187750	Cm1g110810	Ab1g32936	.	.	.	.	.	.	.	.	.	.	.	.
Cs1g12680	.	.	.	.	.	.	.	.	.	.	.	.	.	.	.	.	.
Cs1g12690	Cc1g01383	.	Ci1g187780	.	.	.	.	.	.	.	.	.	.	.	.	.	.
Cs1g12700	Cc1g01380	Cx1g017390	Ci1g187800	Cm1g110770	.	.	.	.	.	.	.	.	.	.	.	.	.
Cs1g12710	Cc1g01379	Cx1g017380	Ci1g187810	Cm1g110780	Ab1g33000	.	.	.	.	.	.	.	.	.	.	.	.
Cs1g12720	Cc1g01378	Cx1g017370	Ci1g187820	Cm1g110770	Ab1g32997	.	.	.	.	.	.	.	.	.	.	.	.
Cs1g12730	Cc1g01377	Cx1g017360	Ci1g187840	.	Ab1g33004	.	.	.	.	.	.	.	.	.	.	.	.
Cs1g12740	Cc1g01376	.	Ci1g187860	Cm1g110760	Ab1g33007	.	.	.	.	.	.	.	.	.	.	.	.
Cs1g12750	Cc1g01375	Cx1g017350	Ci1g187870	Cm1g110750	Ab1g32924	.	.	.	.	.	.	.	.	.	.	.	.
Cs1g12760	Cc1g01374	.	.	Cm1g110740	Ab1g32998	Cs4g17720	Cc4g00581	Cx4g007430	Ci4g194770	Cm4g088800	.	.	.	.	.	.	.
Cs1g12770	.	.	.	.	.	.	.	.	.	.	.	.	.	.	.	.	.
Cs1g12780	.	.	.	.	.	.	.	.	.	.	.	.	.	.	.	.	.
Cs1g12790	Cc1g01369	Cx1g017310	Ci1g187920	Cm1g110700	Ab1g32948	.	.	.	.	.	.	.	.	.	.	.	.
Cs1g12800	.	.	.	.	.	.	.	.	.	.	.	.	.	.	.	.	.
Cs1g12810	Cc1g01367	.	Ci5g061010	.	Ab1g32975	Cs4g17590	Cc4g00593	Cx4g007540	Ci5g061010	Cm4g088690	.	.	.	.	.	.	.
Cs1g12820	Cc1g01366	Cx1g017280	.	Cm1g110670	Ab1g32967	.	.	.	.	.	.	.	.	.	.	.	.
Cs1g12830	Cc1g01365	Cx1g017270	Ci1g187960	Cm1g110660	Ab1g32966	.	.	.	.	.	.	.	.	.	.	.	.
Cs1g12840	Cc1g01364	Cx1g017260	Ci1g187970	Cm1g110650	Ab1g33005	.	.	.	.	.	.	.	.	.	.	.	.
Cs1g12850	.	.	.	.	Ab1g32987	.	.	.	.	.	.	.	.	.	.	.	.
Cs1g12860	.	.	.	.	.	.	.	.	.	.	.	.	.	.	.	.	.
Cs1g12870	Cc1g01363	Cx1g017220	.	Cm1g110630	Ab1g32930	.	.	.	.	.	.	.	.	.	.	.	.
Cs1g12880	Cc1g01357	Cx1g017200	Ci1g187990	Cm1g110610	Ab1g32927	.	.	.	.	.	.	.	.	.	.	.	.
Cs1g12890	Cc1g01356	Cx1g017190	Ci1g188000	Cm1g110600	Ab1g32969	.	.	.	.	.	.	.	.	.	.	.	.
Cs1g12900	Cc1g01355	.	Ci1g188010	.	.	.	.	.	.	.	.	.	.	.	.	.	.
Cs1g12910	.	.	Ci3g013230	.	.	.	.	.	.	.	.	.	.	.	.	.	.
Cs1g12915	.	.	.	.	.	.	.	.	.	.	.	.	.	.	.	.	.
Cs1g12920	.	.	.	.	.	.	.	.	.	.	.	.	.	.	.	.	.
Cs1g12930	.	.	.	.	.	.	.	.	.	.	.	.	.	.	.	.	.
Cs1g12940	.	.	Ci1g188030	.	Ab1g17678	.	.	.	.	.	.	.	.	.	.	.	.
Cs1g12950	.	.	.	.	.	.	.	.	.	.	.	.	.	.	.	.	.
Cs1g12960	Cc1g01351	.	.	.	.	.	.	.	.	.	.	.	.	.	.	.	.
Cs1g12970	.	.	.	.	.	.	.	.	.	.	.	.	.	.	.	.	.
Cs1g12975	.	.	.	.	.	.	.	.	.	.	.	.	.	.	.	.	.
Cs1g12980	.	.	.	.	Ab1g33692	.	.	.	.	.	.	.	.	.	.	.	.
Cs1g12990	Cc1g01349	Cx4g002650	Ci7g069370	.	.	Cs7g05100	Cc4g00261	Cx4g002650	Ci7g069370	Cm7g219220	Ab7g27844	.	.	.	.	.	.
Cs1g13000	.	.	.	.	.	.	.	.	.	.	.	.	.	.	.	.	.
Cs1g13010	.	.	Ci1g188060	.	.	.	.	.	.	.	.	.	.	.	.	.	.
Cs1g13020	.	Cx1g017180	.	.	.	.	.	.	.	.	.	.	.	.	.	.	.
Cs1g13030	.	.	.	.	.	.	.	.	.	.	.	.	.	.	.	.	.
Cs1g13033	.	.	.	.	.	.	.	.	.	.	.	.	.	.	.	.	.
Cs1g13036	.	.	.	.	.	.	.	.	.	.	.	.	.	.	.	.	.
Cs1g13040	.	.	.	Cm1g110560	.	.	.	.	.	.	.	.	.	.	.	.	.
Cs1g13050	.	.	.	.	.	.	.	.	.	.	.	.	.	.	.	.	.
Cs1g13060	.	.	.	.	.	.	.	.	.	.	.	.	.	.	.	.	.
Cs1g13070	.	.	.	.	.	.	.	.	.	.	.	.	.	.	.	.	.
Cs1g13080	Cc1g01344	Cx1g017070	Ci1g188070	Cm1g110550	Ab1g33687	Cs4g17540	Cc4g00598	.	Ci5g060950	.	.	.	.	.	.	.	.
Cs1g13090	.	.	Ci3g013200	.	.	.	.	.	.	.	.	.	.	.	.	.	.
Cs1g13100	.	.	.	.	.	.	.	.	.	.	.	.	.	.	.	.	.
Cs1g13110	.	.	.	.	.	.	.	.	.	.	.	.	.	.	.	.	.
Cs1g13120	Cc1g01340	Cx1g016990	Ci3g013150	Cm1g110540	Ab1g33707	.	.	.	.	.	.	.	.	.	.	.	.
Cs1g13130	Cc1g01339	Cx1g016970	Ci3g013130	Cm1g110520	.	Cs7g05050	Cc4g00266	Cx4g002690	Ci7g069430	Cm7g219160	Ab7g27817	Cs4g17505	Cc4g00601	Cx4g007620	Ci5g060910	Cm4g088600	Ab4g32246
Cs1g13140	.	Cx1g016960	.	Cm1g110510	Ab1g33656	.	.	.	.	.	.	.	.	.	.	.	.
Cs1g13150	Cc1g01338	Cx1g016950	Ci3g013100	Cm1g110500	Ab1g33670	.	.	.	.	.	.	.	.	.	.	.	.
Cs1g13160	Cc1g01336	Cx1g016920	Ci3g013080	Cm1g110480	Ab1g33652	.	.	.	.	.	.	.	.	.	.	.	.
Cs1g13170	Cc1g01335	Cx1g016910	Ci3g013070	Cm1g110470	Ab1g33647	.	.	.	.	.	.	.	.	.	.	.	.
Cs1g13180	Cc1g01334	Cx1g016900	Ci3g013060	Cm1g110460	Ab1g33681	Cs4g17430	Cc4g00610	Cx4g007730	Ci5g060800	Cm4g088500	Ab4g32171	.	.	.	.	.	.
Cs1g13190	Cc1g01333	Cx1g016890	Ci3g013050	Cm1g110450	Ab1g33673	.	.	.	.	.	.	.	.	.	.	.	.
Cs1g13200	Cc1g01332	Cx1g016880	Ci3g013040	Cm1g110440	Ab1g33642	.	.	.	.	.	.	.	.	.	.	.	.
Cs1g13210	Cc1g01331	Cx1g016870	Ci3g013030	Cm1g110430	Ab1g33643	Cs7g05040	Cc4g00267	Cx4g002700	Ci7g069440	Cm7g219150	Ab7g27857	Cs4g19730	Cc4g00383	Cx4g003830	Ci4g113140	Cm1g025890	Ab4g29330
Cs1g13220	Cc1g01330	Cx1g016860	Ci7g069450	Cm1g110420	Ab1g33689	Cs7g05030	Cc4g00268	Cx4g002710	Ci7g069450	Cm7g219140	Ab7g27799	Cs4g17410	.	Cx4g007750	Ci5g060780	Cm4g088480	Ab4g32337
Cs1g13230	.	.	.	.	.	.	.	.	.	.	.	.	.	.	.	.	.
Cs1g13240	Cc1g01329	Cx1g016850	Ci1g286500	Cm1g110410	Ab1g33668	.	.	.	.	.	.	.	.	.	.	.	.
Cs1g13250	Cc1g01328	Cx1g016840	Ci1g286510	Cm1g110400	Ab1g33648	.	.	.	.	.	.	.	.	.	.	.	.
Cs1g13260	Cc1g01327	Cx1g016830	Ci1g286520	Cm1g110390	Ab1g33695	.	.	.	.	.	.	.	.	.	.	.	.
Cs1g13270	.	.	.	.	.	.	.	.	.	.	.	.	.	.	.	.	.
Cs1g13280	.	Cx1g016800	Ci1g286550	.	Ab1g33675	.	.	.	.	.	.	.	.	.	.	.	.
Cs1g13290	Cc1g01324	Cx1g016780	Ci3g012990	Cm1g110380	Ab1g33660	Cs7g04900	Cc4g00280	Cx4g002840	Ci7g069530	Cm7g219050	Ab7g27849	.	.	.	.	.	.
Cs1g13300	Cc1g01323	Cx1g016760	Ci5g060700	Cm1g110370	Ab1g33644	Cs4g17340	Cc4g00622	Cx4g007810	Ci5g060700	Cm4g003900	Ab4g32345	.	.	.	.	.	.
Cs1g13310	Cc1g01322	Cx1g016750	Ci1g144880	Cm1g110360	Ab1g33663	.	.	.	.	.	.	.	.	.	.	.	.
Cs1g13320	Cc1g01321	Cx1g016740	Ci1g144890	Cm1g110350	.	.	.	.	.	.	.	.	.	.	.	.	.
Cs1g13330	Cc1g01320	Cx1g016730	Ci5g060640	Cm1g062340	Ab1g33666	Cs4g17280	Cc4g00627	Cx4g007870	Ci5g060640	Cm4g003830	Ab4g32176	.	.	.	.	.	.
Cs1g13340	Cc1g01319	Cx1g016720	Ci5g060630	Cm1g062330	.	Cs4g17270	Cc4g00628	Cx4g007880	Ci5g060630	Cm4g003820	Ab4g32326	.	.	.	.	.	.
Cs1g13350	Cc1g01318	Cx1g016710	.	Cm1g062320	Ab1g33657	Cs4g20000	Cc4g00354	Cx4g003470	Ci4g112840	Cm1g062320	Ab4g29401	.	.	.	.	.	.
Cs1g13360	.	Cx1g016690	.	.	.	.	.	.	.	.	.	.	.	.	.	.	.
Cs1g13370	Cc1g01315	Cx1g016680	.	.	Ab1g33684	.	.	.	.	.	.	.	.	.	.	.	.
Cs1g13380	.	.	.	.	.	.	.	.	.	.	.	.	.	.	.	.	.
Cs1g13390	.	.	.	.	.	.	.	.	.	.	.	.	.	.	.	.	.
Cs1g13400	.	.	Ci1g186350	.	.	.	.	.	.	.	.	.	.	.	.	.	.
Cs1g13410	.	.	.	.	.	.	.	.	.	.	.	.	.	.	.	.	.
Cs1g13420	.	.	Ci1g186370	.	.	.	.	.	.	.	.	.	.	.	.	.	.
Cs1g13430	.	.	.	.	.	.	.	.	.	.	.	.	.	.	.	.	.
Cs1g13440	Cc1g01305	Cx1g016390	.	Cm1g062310	Ab1g33661	.	.	.	.	.	.	.	.	.	.	.	.
Cs1g13450	.	.	.	.	.	.	.	.	.	.	.	.	.	.	.	.	.
Cs1g13460	.	.	.	.	.	.	.	.	.	.	.	.	.	.	.	.	.
Cs1g13470	.	.	Ci1g186440	.	.	.	.	.	.	.	.	.	.	.	.	.	.
Cs1g13480	.	.	.	.	.	.	.	.	.	.	.	.	.	.	.	.	.
Cs1g13485	.	.	.	.	.	.	.	.	.	.	.	.	.	.	.	.	.
Cs1g13490	.	.	.	.	.	.	.	.	.	.	.	.	.	.	.	.	.
Cs1g13500	.	.	Ci1g186490	.	.	.	.	.	.	.	.	.	.	.	.	.	.
Cs1g13510	.	.	.	.	.	.	.	.	.	.	.	.	.	.	.	.	.
Cs1g13520	Cc1g01301	Cx1g016330	.	Cm1g062300	Ab1g33709	.	.	.	.	.	.	.	.	.	.	.	.
Cs1g13530	Cc1g01299	Cx1g016320	.	.	Ab1g33691	.	.	.	.	.	.	.	.	.	.	.	.
Cs1g13540	Cc1g01298	Cx1g016310	.	Cm1g062290	Ab1g33711	.	.	.	.	.	.	.	.	.	.	.	.
Cs1g13550	.	Cx1g016300	.	.	.	.	.	.	.	.	.	.	.	.	.	.	.
Cs1g13560	.	.	.	.	.	.	.	.	.	.	.	.	.	.	.	.	.
Cs1g13570	.	.	.	.	.	.	.	.	.	.	.	.	.	.	.	.	.
Cs1g13580	.	.	.	.	.	.	.	.	.	.	.	.	.	.	.	.	.
Cs1g13590	Cc1g01296	Cx1g016280	.	Cm1g062270	Ab1g33690	.	.	.	.	.	.	.	.	.	.	.	.
Cs1g13600	Cc1g01295	Cx1g016270	.	Cm1g062260	Ab1g33685	Cs4g20170	Cc4g00337	Cx4g003320	Ci7g070030	Cm1g062260	Ab4g29494	.	.	.	.	.	.
Cs1g13610	Cc1g01294	Cx1g016260	Ci5g060480	Cm1g062250	Ab1g33653	Cs4g17150	Cc4g00642	Cx4g008040	Ci5g060490	.	.	.	.	.	.	.	.
Cs1g13620	.	.	.	.	.	.	.	.	.	.	.	.	.	.	.	.	.
Cs1g13630	.	.	.	.	.	Cs3g10000	.	.	.	.	.	.	.	.	.	.	.
Cs1g13640	.	.	.	.	.	.	.	.	.	.	.	.	.	.	.	.	.
Cs1g13650	.	.	.	.	.	.	.	.	.	.	.	.	.	.	.	.	.
Cs1g13660	.	.	.	.	.	.	.	.	.	.	.	.	.	.	.	.	.
Cs1g13670	.	.	Ci1g278030	Cm1g062150	.	.	.	.	.	.	.	.	.	.	.	.	.
Cs1g13680	.	.	.	.	.	.	.	.	.	.	.	.	.	.	.	.	.
Cs1g13690	.	.	.	.	.	.	.	.	.	.	.	.	.	.	.	.	.
Cs1g13700	.	.	.	.	.	.	.	.	.	.	.	.	.	.	.	.	.
Cs1g13710	.	.	.	.	.	.	.	.	.	.	.	.	.	.	.	.	.
Cs1g13720	.	.	.	.	.	.	.	.	.	.	.	.	.	.	.	.	.
Cs1g13730	.	.	.	.	.	.	.	.	.	.	.	.	.	.	.	.	.
Cs1g13740	Cc1g01283	Cx1g016120	Ci1g278330	Cm1g062130	Ab1g33676	Cs4g20370	Cc4g00316	Cx4g003120	Ci7g069790	.	Ab4g29306	.	.	.	.	.	.
Cs1g13750	Cc1g01282	Cx1g016110	Ci1g278340	Cm1g062120	.	.	.	.	.	.	.	.	.	.	.	.	.
Cs1g13760	Cc1g01281	Cx1g016100	Ci1g278360	Cm1g062110	Ab1g33706	.	.	.	.	.	.	.	.	.	.	.	.
Cs1g13770	Cc1g01280	Cx1g016060	Ci1g278370	Cm1g062100	.	.	.	.	.	.	.	.	.	.	.	.	.
Cs1g13780	.	.	.	.	.	.	.	.	.	.	.	.	.	.	.	.	.
Cs1g13790	.	.	.	.	.	.	.	.	.	.	.	.	.	.	.	.	.
Cs1g13800	.	.	.	.	.	.	.	.	.	.	.	.	.	.	.	.	.
Cs1g13810	Cc1g01279	Cx1g016050	Ci1g278380	Cm1g062090	Ab1g33686	.	.	.	.	.	.	.	.	.	.	.	.
Cs1g13820	Cc1g01278	.	Ci1g278390	Cm1g062070	Ab1g33092	.	.	.	.	.	.	.	.	.	.	.	.
Cs1g13830	.	.	.	.	.	.	.	.	.	.	.	.	.	.	.	.	.
Cs1g13840	.	.	.	.	.	.	.	.	.	.	.	.	.	.	.	.	.
Cs1g13850	Cc1g01275	Cx1g016010	Ci1g264920	Cm1g062040	Ab1g33688	Cs3g10470	Cc9g00563	Cx3g010720	.	Cm3g197330	Ab3g20955	.	.	.	.	.	.
Cs1g13860	.	Cx1g016000	.	.	.	.	.	.	.	.	.	.	.	.	.	.	.
Cs1g13870	Cc1g01273	Cx1g015990	.	Cm1g062020	.	.	.	.	.	.	.	.	.	.	.	.	.
Cs1g13880	.	.	.	.	.	.	.	.	.	.	.	.	.	.	.	.	.
Cs1g13890	.	.	.	.	.	.	.	.	.	.	.	.	.	.	.	.	.
Cs1g13900	.	.	.	.	.	.	.	.	.	.	.	.	.	.	.	.	.
Cs1g13910	.	.	.	.	.	.	.	.	.	.	.	.	.	.	.	.	.
Cs1g13920	.	Cx1g015980	.	.	Ab1g23064	.	.	.	.	.	.	.	.	.	.	.	.
Cs1g13930	.	.	.	.	.	.	.	.	.	.	.	.	.	.	.	.	.
Cs1g13940	Cc1g01266	Cx1g015950	Ci7g069900	Cm1g061960	Ab1g17674	.	.	.	.	.	.	.	.	.	.	.	.
Cs1g13950	Cc1g01265	Cx1g015930	.	Cm1g061950	Ab1g17679	.	.	.	.	.	.	.	.	.	.	.	.
Cs1g13960	Cc1g01264	Cx1g015920	Ci5g060370	Cm1g061940	Ab1g17676	Cs4g17050	Cc4g00653	Cx4g008150	Ci5g060370	Cm4g003520	.	Cs3g10920	Cc9g00621	Cx3g010270	Ci5g027740	.	Ab3g20933
Cs1g13970	Cc1g01263	Cx1g015910	Ci1g051710	Cm1g061930	Ab1g17667	Cs3g10930	Cc5g03453	Cx3g010260	Ci5g027730	.	Ab3g20958	.	.	.	.	.	.
Cs1g13980	Cc1g01262	Cx1g015900	.	Cm1g061920	Ab1g17681	.	.	.	.	.	.	.	.	.	.	.	.
Cs1g13990	Cc1g01261	Cx1g015890	Ci7g069920	Cm1g061910	Ab1g17682	.	.	.	.	.	.	.	.	.	.	.	.
Cs1g14000	Cc1g01260	Cx1g015880	.	Cm1g061900	Ab1g17671	.	.	.	.	.	.	.	.	.	.	.	.
Cs1g14010	Cc1g01259	Cx1g015870	.	.	Ab1g17689	.	.	.	.	.	.	.	.	.	.	.	.
Cs1g14015	.	.	.	.	.	.	.	.	.	.	.	.	.	.	.	.	.
Cs1g14020	.	.	.	.	.	.	.	.	.	.	.	.	.	.	.	.	.
Cs1g14030	.	.	.	.	.	.	.	.	.	.	.	.	.	.	.	.	.
Cs1g14040	.	.	.	.	.	.	.	.	.	.	.	.	.	.	.	.	.
Cs1g14050	.	.	.	.	.	.	.	.	.	.	.	.	.	.	.	.	.
Cs1g14060	Cc1g01254	Cx1g015810	.	.	Ab1g17673	.	.	.	.	.	.	.	.	.	.	.	.
Cs1g14070	.	.	.	.	.	.	.	.	.	.	.	.	.	.	.	.	.
Cs1g14080	.	.	.	.	.	.	.	.	.	.	.	.	.	.	.	.	.
Cs1g14090	.	.	.	.	.	.	.	.	.	.	.	.	.	.	.	.	.
Cs1g14100	.	.	.	.	.	.	.	.	.	.	.	.	.	.	.	.	.
Cs1g14110	.	.	.	.	.	.	.	.	.	.	.	.	.	.	.	.	.
Cs1g14120	.	.	.	.	Ab1g17686	.	.	.	.	.	.	.	.	.	.	.	.
Cs1g14130	Cc1g01250	Cx1g015740	.	.	Ab1g17691	.	.	.	.	.	.	.	.	.	.	.	.
Cs1g14140	Cc1g01249	Cx1g015730	.	.	Ab1g17685	Cs4g16800	Cc4g00672	Cx4g008390	Ci6g008560	Cm4g003270	Ab4g32217	.	.	.	.	.	.
Cs1g14150	.	.	.	.	.	.	.	.	.	.	.	.	.	.	.	.	.
Cs1g14160	.	.	.	.	.	.	.	.	.	.	.	.	.	.	.	.	.
Cs1g14170	.	.	.	.	.	.	.	.	.	.	.	.	.	.	.	.	.
Cs1g14180	.	.	.	.	.	.	.	.	.	.	.	.	.	.	.	.	.
Cs1g14183	.	.	.	.	.	.	.	.	.	.	.	.	.	.	.	.	.
Cs1g14186	.	.	.	.	.	.	.	.	.	.	.	.	.	.	.	.	.
Cs1g14190	.	.	.	Cm1g200120	.	.	.	.	.	.	.	.	.	.	.	.	.
Cs1g14200	.	.	.	.	.	.	.	.	.	.	.	.	.	.	.	.	.
Cs1g14210	.	.	.	.	.	.	.	.	.	.	.	.	.	.	.	.	.
Cs1g14220	.	.	.	.	.	.	.	.	.	.	.	.	.	.	.	.	.
Cs1g14230	.	.	.	.	.	.	.	.	.	.	.	.	.	.	.	.	.
Cs1g14240	.	Cx1g015630	.	Cm1g200210	.	.	.	.	.	.	.	.	.	.	.	.	.
Cs1g14250	.	.	.	.	.	.	.	.	.	.	.	.	.	.	.	.	.
Cs1g14260	.	.	.	.	.	.	.	.	.	.	.	.	.	.	.	.	.
Cs1g14270	.	.	.	.	.	.	.	.	.	.	.	.	.	.	.	.	.
Cs1g14275	.	.	.	.	.	.	.	.	.	.	.	.	.	.	.	.	.
Cs1g14280	.	.	.	.	.	.	.	.	.	.	.	.	.	.	.	.	.
Cs1g14290	.	.	.	.	.	.	.	.	.	.	.	.	.	.	.	.	.
Cs1g14300	.	.	Ci1g197720	.	.	.	.	.	.	.	.	.	.	.	.	.	.
Cs1g14310	.	.	Ci1g197730	.	.	.	.	.	.	.	.	.	.	.	.	.	.
Cs1g14320	.	Cx4g003460	Ci1g197740	.	.	.	.	.	.	.	.	.	.	.	.	.	.
Cs1g14330	.	.	Ci1g197750	Cm1g025450	.	.	.	.	.	.	.	.	.	.	.	.	.
Cs1g14340	.	.	.	Cm1g025460	.	.	.	.	.	.	.	.	.	.	.	.	.
Cs1g14350	Cc1g01227	Cx1g015280	.	Cm1g192850	Ab1g12425	.	.	.	.	.	.	.	.	.	.	.	.
Cs1g14360	.	.	Ci1g197760	Cm1g192860	.	.	.	.	.	.	.	.	.	.	.	.	.
Cs1g14370	.	.	Ci1g197790	Cm1g192880	.	.	.	.	.	.	.	.	.	.	.	.	.
Cs1g14380	.	.	.	.	.	.	.	.	.	.	.	.	.	.	.	.	.
Cs1g14390	.	Cx1g015070	Ci1g197830	Cm1g192910	Ab1g12420	.	.	.	.	.	.	.	.	.	.	.	.
Cs1g14400	.	.	Ci1g197840	Cm1g192920	.	.	.	.	.	.	.	.	.	.	.	.	.
Cs1g14410	Cc1g01211	Cx1g015060	.	Cm1g192940	.	.	.	.	.	.	.	.	.	.	.	.	.
Cs1g14420	Cc1g01207	Cx1g015050	Ci1g197850	Cm1g192960	.	.	.	.	.	.	.	.	.	.	.	.	.
Cs1g14430	Cc1g01206	Cx1g015030	.	.	.	.	.	.	.	.	.	.	.	.	.	.	.
Cs1g14440	Cc1g01204	Cx1g015010	Ci1g197860	Cm1g192970	Ab1g12391	.	.	.	.	.	.	.	.	.	.	.	.
Cs1g14450	.	.	.	.	.	.	.	.	.	.	.	.	.	.	.	.	.
Cs1g14460	.	.	Ci1g197880	Cm1g193000	.	.	.	.	.	.	.	.	.	.	.	.	.
Cs1g14470	.	.	Ci1g197890	Cm1g193010	.	.	.	.	.	.	.	.	.	.	.	.	.
Cs1g14480	.	.	Ci1g197900	Cm1g193020	.	.	.	.	.	.	.	.	.	.	.	.	.
Cs1g14490	.	.	Ci1g197910	Cm1g193030	.	Cs4g16730	Cc4g00679	Cx4g008470	Ci6g008670	Cm4g003190	Ab4g32369	.	.	.	.	.	.
Cs1g14500	.	.	Ci1g197920	Cm1g193040	.	.	.	.	.	.	.	.	.	.	.	.	.
Cs1g14510	.	.	Ci1g197930	Cm1g193050	.	.	.	.	.	.	.	.	.	.	.	.	.
Cs1g14520	.	.	Ci1g197940	Cm1g193070	.	.	.	.	.	.	.	.	.	.	.	.	.
Cs1g14530	.	.	Ci1g197950	Cm1g193080	.	.	.	.	.	.	.	.	.	.	.	.	.
Cs1g14540	Cc1g01200	Cx1g014940	.	Cm1g193090	Ab1g12447	.	.	.	.	.	.	.	.	.	.	.	.
Cs1g14550	.	.	.	.	.	.	.	.	.	.	.	.	.	.	.	.	.
Cs1g14560	.	.	.	Cm1g193130	.	.	.	.	.	.	.	.	.	.	.	.	.
Cs1g14570	.	.	Ci4g112790	.	.	.	.	.	.	.	.	.	.	.	.	.	.
Cs1g14580	.	.	Ci1g197990	Cm1g193140	.	.	.	.	.	.	.	.	.	.	.	.	.
Cs1g14590	.	.	.	Cm1g193150	.	.	.	.	.	.	.	.	.	.	.	.	.
Cs1g14600	.	.	Ci1g198000	Cm1g193160	.	.	.	.	.	.	.	.	.	.	.	.	.
Cs1g14610	.	.	Ci1g198010	Cm1g193170	.	.	.	.	.	.	.	.	.	.	.	.	.
Cs1g14620	.	.	Ci1g198020	Cm1g193180	.	.	.	.	.	.	.	.	.	.	.	.	.
Cs1g14630	Cc1g01199	.	.	Cm1g025550	Ab1g12404	.	.	.	.	.	.	.	.	.	.	.	.
Cs1g14640	.	.	Ci1g198030	.	.	.	.	.	.	.	.	.	.	.	.	.	.
Cs1g14650	.	.	.	.	.	.	.	.	.	.	.	.	.	.	.	.	.
Cs1g14660	.	.	Ci1g198040	.	.	.	.	.	.	.	.	.	.	.	.	.	.
Cs1g14670	.	.	.	.	.	.	.	.	.	.	.	.	.	.	.	.	.
Cs1g14680	.	.	.	.	.	.	.	.	.	.	.	.	.	.	.	.	.
Cs1g14690	.	.	Ci6g205840	.	.	.	.	.	.	.	.	.	.	.	.	.	.
Cs1g14700	.	.	Ci6g205830	.	.	.	.	.	.	.	.	.	.	.	.	.	.
Cs1g14710	.	.	Ci6g205820	.	.	.	.	.	.	.	.	.	.	.	.	.	.
Cs1g14720	.	.	Ci6g205790	.	.	.	.	.	.	.	.	.	.	.	.	.	.
Cs1g14730	.	.	Ci6g205750	.	.	.	.	.	.	.	.	.	.	.	.	.	.
Cs1g14740	.	.	.	.	.	.	.	.	.	.	.	.	.	.	.	.	.
Cs1g14750	.	.	.	.	.	.	.	.	.	.	.	.	.	.	.	.	.
Cs1g14760	.	.	.	.	.	.	.	.	.	.	.	.	.	.	.	.	.
Cs1g14770	.	.	.	.	.	.	.	.	.	.	.	.	.	.	.	.	.
Cs1g14780	.	.	.	.	.	.	.	.	.	.	.	.	.	.	.	.	.
Cs1g14790	.	.	.	.	.	.	.	.	.	.	.	.	.	.	.	.	.
Cs1g14800	.	.	.	.	.	.	.	.	.	.	.	.	.	.	.	.	.
Cs1g14805	.	.	.	.	.	.	.	.	.	.	.	.	.	.	.	.	.
Cs1g14810	.	.	.	.	.	.	.	.	.	.	.	.	.	.	.	.	.
Cs1g14820	Cc1g01191	Cx1g014840	.	.	.	Cs1g22400	.	.	.	.	.	.	.	.	.	.	.
Cs1g14830	.	.	.	.	.	.	.	.	.	.	.	.	.	.	.	.	.
Cs1g14840	.	.	.	.	.	.	.	.	.	.	.	.	.	.	.	.	.
Cs1g14850	.	.	.	.	.	.	.	.	.	.	.	.	.	.	.	.	.
Cs1g14860	.	.	.	.	Ab1g12427	.	.	.	.	.	.	.	.	.	.	.	.
Cs1g14870	.	.	.	.	.	.	.	.	.	.	.	.	.	.	.	.	.
Cs1g14880	.	.	.	.	.	.	.	.	.	.	.	.	.	.	.	.	.
Cs1g14890	Cc1g01186	Cx1g014780	Ci1g267460	.	.	.	.	.	.	.	.	.	.	.	.	.	.
Cs1g14893	.	.	.	.	.	.	.	.	.	.	.	.	.	.	.	.	.
Cs1g14896	.	.	.	.	.	.	.	.	.	.	.	.	.	.	.	.	.
Cs1g14900	.	.	.	.	.	.	.	.	.	.	.	.	.	.	.	.	.
Cs1g14910	.	.	.	.	Ab1g12460	.	.	.	.	.	.	.	.	.	.	.	.
Cs1g14920	.	.	.	.	.	.	.	.	.	.	.	.	.	.	.	.	.
Cs1g14930	Cc1g01185	Cx1g014750	.	Cm1g025600	.	.	.	.	.	.	.	.	.	.	.	.	.
Cs1g14940	Cc1g01184	.	.	.	Ab1g12208	.	.	.	.	.	.	.	.	.	.	.	.
Cs1g14950	Cc1g01178	Cx1g014740	Ci1g267500	Cm1g025610	Ab1g12196	Cs6g08760	Cc6g00843	Cx6g009330	.	.	.	.	.	.	.	.	.
Cs1g14960	Cc1g01177	Cx1g014730	Ci1g267520	Cm1g025620	.	.	.	.	.	.	.	.	.	.	.	.	.
Cs1g14970	Cc1g01176	Cx1g014720	Ci1g267540	Cm1g025630	Ab1g12301	Cs6g08430	Cc6g00815	Cx8g024140	Ci8g005980	Cm6g130980	Ab6g21932	.	.	.	.	.	.
Cs1g14980	Cc1g01175	Cx1g014710	.	Cm1g025650	Ab1g12296	.	.	.	.	.	.	.	.	.	.	.	.
Cs1g14990	.	Cx1g014700	.	.	.	.	.	.	.	.	.	.	.	.	.	.	.
Cs1g15000	.	.	.	.	.	Cs4g19960	Cc4g00358	Cx4g003520	Ci4g112870	.	.	.	.	.	.	.	.
Cs1g15010	.	.	.	.	.	.	.	.	.	.	.	.	.	.	.	.	.
Cs1g15020	Cc1g01172	Cx1g014670	Ci1g267590	Cm1g025680	Ab1g12206	.	.	.	.	.	.	.	.	.	.	.	.
Cs1g15030	Cc1g01171	Cx1g014660	Ci1g267610	.	.	Cs4g19960	Cc4g00358	Cx4g003520	Ci4g112870	.	.	.	.	.	.	.	.
Cs1g15040	Cc1g01170	Cx1g014650	Ci1g267620	Cm1g025690	Ab1g12202	.	.	.	.	.	.	.	.	.	.	.	.
Cs1g15050	.	.	.	.	.	.	.	.	.	.	.	.	.	.	.	.	.
Cs1g15060	Cc1g01168	Cx1g014630	Ci1g267640	Cm1g025710	Ab1g12200	.	.	.	.	.	.	.	.	.	.	.	.
Cs1g15070	Cc1g01167	Cx1g014620	Ci1g267660	Cm1g025720	.	.	.	.	.	.	.	.	.	.	.	.	.
Cs1g15080	.	.	.	.	.	.	.	.	.	.	.	.	.	.	.	.	.
Cs1g15090	Cc1g01166	Cx1g014610	Ci1g287340	Cm1g025730	Ab1g12215	Cs4g19870	.	Cx4g003670	Ci4g112980	Cm1g025750	Ab4g29390	.	.	.	.	.	.
Cs1g15100	.	Cx1g014600	Ci1g287350	Cm1g025750	Ab4g29390	.	.	.	.	.	.	.	.	.	.	.	.
Cs1g15110	Cc1g01165	Cx1g014590	.	Cm1g025760	Ab1g12276	.	.	.	.	.	.	.	.	.	.	.	.
Cs1g15120	Cc1g01164	Cx1g014580	.	Cm1g025770	Ab1g12228	Cs4g16000	Cc1g01164	Cx9g019500	Ci7g095820	Cm1g025770	.	Cs1g22530	Cc1g00434	Cx1g005450	Ci1g058260	.	Ab3g35211
Cs1g15130	Cc1g01163	Cx1g014570	.	Cm1g025780	Ab1g12284	Cs4g16020	Cc1g01163	Cx9g019530	Ci7g095850	Cm1g025780	Ab4g32179	.	.	.	.	.	.
Cs1g15140	Cc1g01162	Cx1g014560	.	Cm1g025800	.	.	.	.	.	.	.	.	.	.	.	.	.
Cs1g15150	.	Cx1g014550	.	Cm1g025810	Ab1g12224	.	.	.	.	.	.	.	.	.	.	.	.
Cs1g15160	Cc1g01158	Cx1g014540	.	Cm1g025820	Ab1g12214	Cs4g16040	Cc1g01158	Cx9g019550	Ci7g095870	Cm1g025820	Ab4g32153	.	.	.	.	.	.
Cs1g15170	Cc1g01157	Cx1g014530	Ci1g296790	Cm1g025830	Ab1g12192	.	.	.	.	.	.	.	.	.	.	.	.
Cs1g15180	.	.	.	.	Ab1g12180	.	.	.	.	.	.	.	.	.	.	.	.
Cs1g15190	Cc1g01155	Cx1g014510	.	Cm1g025860	Ab1g12254	.	.	.	.	.	.	.	.	.	.	.	.
Cs1g15200	Cc1g01154	Cx1g014500	.	.	Ab1g12193	.	.	.	.	.	.	.	.	.	.	.	.
Cs1g15210	.	.	.	.	.	.	.	.	.	.	.	.	.	.	.	.	.
Cs1g15220	.	Cx1g014470	Ci4g113140	Cm1g025890	Ab1g12293	Cs4g16090	.	Cx9g019620	.	Cm1g025890	Ab4g32386	.	.	.	.	.	.
Cs1g15230	.	.	.	.	.	Cs1g23020	.	.	.	.	.	.	.	.	.	.	.
Cs1g15240	Cc1g01151	Cx1g014460	Ci1g292480	.	Ab1g12230	.	.	.	.	.	.	.	.	.	.	.	.
Cs1g15250	Cc1g01150	Cx1g014450	.	Cm1g025900	Ab1g12264	.	.	.	.	.	.	.	.	.	.	.	.
Cs1g15260	Cc1g01149	Cx1g014440	.	.	Ab1g12235	.	.	.	.	.	.	.	.	.	.	.	.
Cs1g15270	Cc1g01148	Cx1g014430	Ci1g284600	Cm1g025920	Ab1g12267	.	.	.	.	.	.	.	.	.	.	.	.
Cs1g15280	.	.	.	Cm1g025930	.	.	.	.	.	.	.	.	.	.	.	.	.
Cs1g15290	Cc1g01146	Cx1g014420	.	Cm1g025960	.	.	.	.	.	.	.	.	.	.	.	.	.
Cs1g15300	.	.	Ci1g283490	Cm1g025970	.	.	.	.	.	.	.	.	.	.	.	.	.
Cs1g15310	Cc1g01145	Cx1g014410	Ci1g283500	Cm1g025980	Ab1g12297	.	.	.	.	.	.	.	.	.	.	.	.
Cs1g15320	.	.	.	.	Ab1g12222	.	.	.	.	.	.	.	.	.	.	.	.
Cs1g15330	Cc1g01143	Cx1g014380	Ci1g253440	.	Ab1g12173	.	.	.	.	.	.	.	.	.	.	.	.
Cs1g15340	Cc1g01140	Cx1g014370	Ci1g253450	Cm1g026000	Ab1g12233	.	.	.	.	.	.	.	.	.	.	.	.
Cs1g15350	.	Cx1g014360	Ci1g253460	Cm1g026010	Ab1g12287	.	.	.	.	.	.	.	.	.	.	.	.
Cs1g15360	Cc1g01138	Cx1g014350	.	Cm1g026020	Ab1g12201	Cs4g16200	Cc1g01138	Cx1g012580	.	Cm2g000250	Ab4g32202	.	.	.	.	.	.
Cs1g15370	Cc1g01137	Cx1g014340	.	Cm1g026030	Ab1g12261	.	.	.	.	.	.	.	.	.	.	.	.
Cs1g15380	Cc1g01136	Cx1g014330	.	Cm1g026040	Ab1g12177	.	.	.	.	.	.	.	.	.	.	.	.
Cs1g15390	Cc1g01135	Cx1g014320	.	Cm1g026050	Ab1g12248	Cs4g16220	Cc1g01135	Cx1g012560	Ci4g220190	Cm2g000230	Ab4g32152	.	.	.	.	.	.
Cs1g15400	Cc1g01134	Cx1g014310	.	Cm1g026060	Ab1g12174	.	.	.	.	.	.	.	.	.	.	.	.
Cs1g15410	Cc1g01133	Cx1g014300	.	Cm1g026070	Ab1g12176	.	.	.	.	.	.	.	.	.	.	.	.
Cs1g15420	Cc1g01132	Cx1g014290	Ci4g113300	Cm1g026080	Ab1g12239	Cs4g19570	Cc4g00399	Cx4g004000	Ci4g113300	Cm1g026080	Ab4g29284	Cs1g23340	Cc1g00361	Cx1g003300	Ci5g213500	Cm1g150050	Ab1g15812
Cs1g15430	Cc1g01131	Cx1g014280	.	Cm1g026090	Ab1g12207	.	.	.	.	.	.	.	.	.	.	.	.
Cs1g15440	Cc1g01130	Cx1g014270	.	Cm1g026100	.	Cs6g07970	Cc6g00775	Cx6g006520	Ci7g011920	.	.	.	.	.	.	.	.
Cs1g15450	Cc1g01129	Cx1g014250	.	Cm1g026110	Ab1g12277	.	.	.	.	.	.	.	.	.	.	.	.
Cs1g15460	Cc1g01128	Cx1g014240	.	Cm1g026120	Ab1g12223	.	.	.	.	.	.	.	.	.	.	.	.
Cs1g15470	Cc1g01127	Cx1g014230	.	Cm1g026130	Ab1g12285	.	.	.	.	.	.	.	.	.	.	.	.
Cs1g15480	Cc1g01126	Cx1g014220	.	Cm1g026140	Ab1g12268	.	.	.	.	.	.	.	.	.	.	.	.
Cs1g15490	Cc1g01125	Cx1g014210	.	Cm1g026150	Ab1g12197	.	.	.	.	.	.	.	.	.	.	.	.
Cs1g15500	Cc1g01124	Cx1g014200	.	Cm1g026160	Ab1g12279	.	.	.	.	.	.	.	.	.	.	.	.
Cs1g15510	Cc1g01123	Cx1g014190	Ci4g113400	Cm1g026170	Ab1g12209	Cs4g19480	Cc4g00408	Cx4g004100	Ci4g113400	Cm1g026170	Ab4g29377	.	.	.	.	.	.
Cs1g15520	Cc1g01122	Cx1g014160	.	Cm1g026190	Ab1g12286	.	.	.	.	.	.	.	.	.	.	.	.
Cs1g15530	Cc1g01121	Cx1g014150	.	Cm1g026200	Ab1g12203	.	.	.	.	.	.	.	.	.	.	.	.
Cs1g15540	.	.	.	.	.	.	.	.	.	.	.	.	.	.	.	.	.
Cs1g15550	.	.	.	.	.	.	.	.	.	.	.	.	.	.	.	.	.
Cs1g15560	Cc1g01118	Cx1g014120	.	Cm1g026230	Ab1g12299	.	.	.	.	.	.	.	.	.	.	.	.
Cs1g15570	Cc1g01117	Cx1g014110	Ci1g191330	Cm1g026240	Ab1g12238	.	.	.	.	.	.	.	.	.	.	.	.
Cs1g15580	Cc1g01116	Cx1g014100	Ci1g191340	Cm1g026250	Ab1g12175	.	.	.	.	.	.	.	.	.	.	.	.
Cs1g15590	Cc1g01115	Cx1g014090	Ci1g191350	Cm1g026260	Ab1g12185	Cs4g19330	Cc4g00420	Cx4g004250	Ci4g113530	Cm1g026260	Ab4g29413	.	.	.	.	.	.
Cs1g15600	Cc1g01114	Cx1g014080	Ci1g191360	Cm1g026270	Ab1g12275	.	.	.	.	.	.	.	.	.	.	.	.
Cs1g15610	Cc1g01113	Cx1g014070	Ci1g191390	Cm1g026290	Ab1g12169	.	.	.	.	.	.	.	.	.	.	.	.
Cs1g15620	.	.	.	.	.	.	.	.	.	.	.	.	.	.	.	.	.
Cs1g15630	Cc1g01112	Cx1g014040	Ci1g191410	Cm1g026310	.	.	.	.	.	.	.	.	.	.	.	.	.
Cs1g15640	Cc1g01110	Cx1g014020	Ci1g191430	Cm1g026320	Ab1g12182	Cs4g19310	Cc4g00422	Cx4g004280	Ci4g113560	Cm1g026320	Ab4g29254	.	.	.	.	.	.
Cs1g15650	.	.	.	.	.	.	.	.	.	.	.	.	.	.	.	.	.
Cs1g15660	Cc1g01109	Cx1g014010	Ci4g113600	Cm1g026330	Ab1g12251	Cs4g19280	Cc4g00425	Cx4g004350	Ci4g113600	Cm1g026330	.	.	.	.	.	.	.
Cs1g15670	Cc1g01108	Cx1g014000	Ci1g191450	Cm1g026340	Ab1g12191	.	.	.	.	.	.	.	.	.	.	.	.
Cs1g15680	Cc1g01107	Cx1g013990	Ci1g191460	Cm1g026350	Ab1g12255	Cs4g16350	.	Cx1g012400	Ci4g220070	Cm2g000110	Ab4g32248	.	.	.	.	.	.
Cs1g15690	Cc1g01106	Cx1g013980	Ci1g191470	Cm1g026360	Ab1g12225	Cs4g19210	Cc4g00432	Cx4g004420	Ci4g113660	Cm1g026360	Ab4g29445	.	.	.	.	.	.
Cs1g15700	Cc1g01105	Cx1g013970	Ci1g191480	Cm1g026370	Ab1g12302	.	.	.	.	.	.	.	.	.	.	.	.
Cs1g15710	.	.	.	.	.	.	.	.	.	.	.	.	.	.	.	.	.
Cs1g15720	Cc1g01103	Cx1g013940	Ci1g191500	Cm1g026390	Ab1g12237	Cs4g19200	Cc4g00434	Cx4g004430	Ci4g113680	Cm1g026390	Ab4g29349	.	.	.	.	.	.
Cs1g15730	Cc1g01102	Cx1g013930	Ci1g191510	Cm1g026400	Ab1g12217	Cs6g07820	Cc6g00764	Cx6g006420	Ci8g006360	Cm8g099830	Ab6g13056	.	.	.	.	.	.
Cs1g15740	.	Cx1g013920	.	Cm1g026410	Ab1g12211	.	.	.	.	.	.	.	.	.	.	.	.
Cs1g15750	Cc1g01101	Cx1g013910	Ci1g191520	Cm1g026420	Ab1g12271	.	.	.	.	.	.	.	.	.	.	.	.
Cs1g15760	Cc1g01100	Cx1g013900	Ci1g191530	Cm1g026430	Ab1g12257	Cs4g19100	Cc4g00438	Cx4g004470	Ci4g113710	Cm1g026430	Ab4g29468	.	.	.	.	.	.
Cs1g15770	Cc1g01099	Cx1g013890	Ci1g191540	Cm1g026440	Ab1g12250	.	.	.	.	.	.	.	.	.	.	.	.
Cs1g15780	Cc1g01098	Cx1g013880	Ci1g191550	Cm1g026450	Ab1g12229	.	.	.	.	.	.	.	.	.	.	.	.
Cs1g15790	Cc1g01097	Cx1g013870	Ci1g191560	Cm1g026460	Ab1g12260	.	.	.	.	.	.	.	.	.	.	.	.
Cs1g15800	Cc1g01096	Cx1g013860	Ci1g191580	Cm1g026470	.	.	.	.	.	.	.	.	.	.	.	.	.
Cs1g15810	Cc1g01095	Cx1g013850	Ci1g191590	Cm1g026480	Ab1g12243	Cs7g12680	Cc7g01621	Cx7g015020	.	Cm7g037580	Ab7g34354	.	.	.	.	.	.
Cs1g15820	.	.	.	.	.	.	.	.	.	.	.	.	.	.	.	.	.
Cs1g15830	Cc1g01093	Cx1g013830	Ci1g191610	.	Ab1g12232	Cs4g19090	Cc4g00440	Cx4g004480	.	.	Ab4g29326	.	.	.	.	.	.
Cs1g15840	Cc1g01091	Cx1g013820	Ci1g191620	Cm1g026510	Ab1g12290	.	.	.	.	.	.	.	.	.	.	.	.
Cs1g15850	Cc1g01090	Cx1g013810	.	.	Ab1g12210	Cs4g19050	Cc4g00445	.	.	.	.	.	.	.	.	.	.
Cs1g15860	Cc1g01089	Cx1g013800	Ci1g191630	Cm1g026520	Ab1g12298	.	.	.	.	.	.	.	.	.	.	.	.
Cs1g15870	Cc1g01088	Cx1g013790	Ci1g191640	Cm1g026530	Ab1g12227	.	.	.	.	.	.	.	.	.	.	.	.
Cs1g15880	Cc1g01087	Cx1g013780	Ci1g191650	Cm1g026540	Ab1g12236	Cs4g12860	Cc4g00821	Cx5g016820	Ci4g274970	Cm4g258760	Ab4g15603	.	.	.	.	.	.
Cs1g15890	Cc1g01086	Cx1g013770	Ci1g191660	Cm1g026550	Ab1g12291	Cs4g12960	Cc4g00827	Cx5g016970	Ci4g197320	Cm4g165790	Ab4g15571	.	.	.	.	.	.
Cs1g15900	Cc1g01085	Cx1g013760	Ci1g191670	Cm1g026560	Ab1g12198	.	.	.	.	.	.	.	.	.	.	.	.
Cs1g15910	.	.	.	.	.	.	.	.	.	.	.	.	.	.	.	.	.
Cs1g15920	Cc1g01084	Cx1g013720	Ci1g236840	Cm1g026600	Ab1g12269	.	.	.	.	.	.	.	.	.	.	.	.
Cs1g15930	Cc1g01083	Cx1g013710	Ci1g236850	Cm1g026610	.	Cs4g13000	Cc4g00831	Cx5g017020	Ci4g197280	Cm4g165830	Ab4g15612	.	.	.	.	.	.
Cs1g15940	Cc1g01082	Cx1g013700	Ci1g236860	Cm1g026620	.	.	.	.	.	.	.	.	.	.	.	.	.
Cs1g15950	.	.	.	.	.	.	.	.	.	.	.	.	.	.	.	.	.
Cs1g15960	Cc1g01080	Cx1g013680	Ci1g236890	Cm1g026650	.	Cs4g13050	Cc4g00836	Cx5g017070	.	.	Ab4g15553	.	.	.	.	.	.
Cs1g15970	Cc1g01079	Cx1g013660	Ci1g236900	Cm1g026660	.	Cs4g13070	Cc4g00839	Cx5g017100	Ci4g197170	Cm4g146410	Ab4g15629	.	.	.	.	.	.
Cs1g15980	Cc1g01078	Cx1g013650	Ci1g236910	Cm1g026670	.	Cs7g12710	Cc7g01618	Cx7g014990	.	Cm7g037610	Ab7g34402	.	.	.	.	.	.
Cs1g15990	.	.	.	.	.	.	.	.	.	.	.	.	.	.	.	.	.
Cs1g16000	.	.	.	.	.	.	.	.	.	.	.	.	.	.	.	.	.
Cs1g16010	.	.	.	.	Ab4g29410	.	.	.	.	.	.	.	.	.	.	.	.
Cs1g16020	Cc1g01074	Cx1g013590	.	Cm1g026720	.	.	.	.	.	.	.	.	.	.	.	.	.
Cs1g16023	Cc1g01073	Cx1g013580	.	Cm1g026730	.	.	.	.	.	.	.	.	.	.	.	.	.
Cs1g16026	Cc1g01072	Cx1g013570	.	Cm1g026740	.	.	.	.	.	.	.	.	.	.	.	.	.
Cs1g16030	Cc1g01071	Cx1g013560	.	Cm1g026750	.	Cs4g13120	Cc4g00844	Cx5g017150	Ci4g197100	Cm4g146460	Ab4g15638	.	.	.	.	.	.
Cs1g16040	.	.	.	.	.	.	.	.	.	.	.	.	.	.	.	.	.
Cs1g16050	.	.	.	.	.	.	.	.	.	.	.	.	.	.	.	.	.
Cs1g16060	.	.	.	.	.	.	.	.	.	.	.	.	.	.	.	.	.
Cs1g16070	Cc1g01065	Cx1g013520	.	.	Ab4g29528	.	.	.	.	.	.	.	.	.	.	.	.
Cs1g16080	.	.	.	.	.	.	.	.	.	.	.	.	.	.	.	.	.
Cs1g16090	.	.	.	.	.	.	.	.	.	.	.	.	.	.	.	.	.
Cs1g16100	.	.	.	.	.	.	.	.	.	.	.	.	.	.	.	.	.
Cs1g16110	.	.	.	.	.	.	.	.	.	.	.	.	.	.	.	.	.
Cs1g16120	.	.	.	.	.	.	.	.	.	.	.	.	.	.	.	.	.
Cs1g16130	.	.	.	.	.	.	.	.	.	.	.	.	.	.	.	.	.
Cs1g16140	.	.	.	.	.	.	.	.	.	.	.	.	.	.	.	.	.
Cs1g16150	Cc1g01059	Cx1g013430	.	.	.	.	.	.	.	.	.	.	.	.	.	.	.
Cs1g16160	Cc1g01058	Cx1g013420	.	Cm1g026870	Ab4g29278	.	.	.	.	.	.	.	.	.	.	.	.
Cs1g16170	Cc1g01057	Cx1g013410	.	Cm1g026890	Ab4g29493	.	.	.	.	.	.	.	.	.	.	.	.
Cs1g16180	Cc3g00840	Cx3g006490	Ci1g168490	Cm1g017620	.	.	.	.	.	.	.	.	.	.	.	.	.
Cs1g16183	.	.	.	.	.	.	.	.	.	.	.	.	.	.	.	.	.
Cs1g16186	.	.	.	.	.	.	.	.	.	.	.	.	.	.	.	.	.
Cs1g16190	Cc3g00838	Cx3g006510	Ci1g168510	Cm1g017610	.	.	.	.	.	.	.	.	.	.	.	.	.
Cs1g16200	Cc3g00837	Cx3g006520	Ci1g168520	Cm1g017600	.	.	.	.	.	.	.	.	.	.	.	.	.
Cs1g16210	Cc3g00836	Cx3g006530	Ci1g168530	Cm1g017590	.	.	.	.	.	.	.	.	.	.	.	.	.
Cs1g16220	Cc3g00834	Cx3g006540	Ci1g168550	Cm1g017580	.	.	.	.	.	.	.	.	.	.	.	.	.
Cs1g16230	Cc3g00832	Cx3g006550	Ci1g168560	Cm1g017570	.	Cs7g13010	Cc7g01588	Cx7g014690	.	Cm7g037880	Ab7g34184	.	.	.	.	.	.
Cs1g16240	Cc3g00831	Cx3g006560	Ci1g168570	Cm1g017560	.	.	.	.	.	.	.	.	.	.	.	.	.
Cs1g16250	Cc3g00830	Cx3g006570	Ci1g168580	Cm1g017550	.	.	.	.	.	.	.	.	.	.	.	.	.
Cs1g16260	.	.	.	.	.	.	.	.	.	.	.	.	.	.	.	.	.
Cs1g16270	Cc3g00829	Cx3g006590	Ci1g168600	Cm1g017540	.	.	.	.	.	.	.	.	.	.	.	.	.
Cs1g16273	.	.	.	.	.	.	.	.	.	.	.	.	.	.	.	.	.
Cs1g16276	.	.	.	.	.	.	.	.	.	.	.	.	.	.	.	.	.
Cs1g16280	.	.	Ci1g168620	.	.	.	.	.	.	.	.	.	.	.	.	.	.
Cs1g16290	Cc3g00825	Cx3g006610	Ci1g168630	Cm1g017530	.	Cs7g13370	Cc7g01554	Cx7g014340	.	Cm7g038260	Ab7g34347	Cs4g13520	Cc4g00875	Cx4g014970	.	.	.
Cs1g16300	Cc3g00824	Cx3g006620	Ci1g168640	Cm1g017520	.	.	.	.	.	.	.	.	.	.	.	.	.
Cs1g16310	Cc3g00823	Cx3g006630	Ci1g168650	Cm1g017510	.	.	.	.	.	.	.	.	.	.	.	.	.
Cs1g16320	Cc3g00822	Cx3g006650	Ci1g168680	Cm1g017490	.	.	.	.	.	.	.	.	.	.	.	.	.
Cs1g16325	.	.	.	.	.	.	.	.	.	.	.	.	.	.	.	.	.
Cs1g16330	.	.	.	.	.	.	.	.	.	.	.	.	.	.	.	.	.
Cs1g16335	.	Cx3g006660	Ci1g267310	.	.	.	.	.	.	.	.	.	.	.	.	.	.
Cs1g16340	Cc3g00821	Cx3g006670	.	Cm1g017470	.	.	.	.	.	.	.	.	.	.	.	.	.
Cs1g16350	Cc3g00820	Cx3g006680	.	Cm1g017450	.	.	.	.	.	.	.	.	.	.	.	.	.
Cs1g16360	.	Cx3g006690	.	.	.	.	.	.	.	.	.	.	.	.	.	.	.
Cs1g16370	Cc3g00819	Cx3g006700	.	Cm1g017430	.	.	.	.	.	.	.	.	.	.	.	.	.
Cs1g16380	Cc3g00818	Cx3g006720	.	Cm1g017420	.	.	.	.	.	.	.	.	.	.	.	.	.
Cs1g16390	Cc3g00817	Cx3g006730	Ci8g052390	Cm1g017410	.	.	.	.	.	.	.	.	.	.	.	.	.
Cs1g16400	Cc3g00816	Cx3g006740	Ci8g052380	Cm1g017400	.	.	.	.	.	.	.	.	.	.	.	.	.
Cs1g16410	Cc3g00815	Cx3g006750	Ci8g052370	Cm1g017390	.	.	.	.	.	.	.	.	.	.	.	.	.
Cs1g16420	Cc3g00814	Cx3g006760	Ci8g052360	Cm1g017380	.	.	.	.	.	.	.	.	.	.	.	.	.
Cs1g16425	.	.	.	.	.	.	.	.	.	.	.	.	.	.	.	.	.
Cs1g16430	Cc3g00813	Cx3g006770	Ci8g052340	Cm1g017370	.	.	.	.	.	.	.	.	.	.	.	.	.
Cs1g16440	.	.	.	.	.	.	.	.	.	.	.	.	.	.	.	.	.
Cs1g16450	.	Cx1g013370	Ci1g172440	.	.	.	.	.	.	.	.	.	.	.	.	.	.
Cs1g16460	Cc1g01053	.	Ci1g172450	Cm1g026920	Ab4g29418	.	.	.	.	.	.	.	.	.	.	.	.
Cs1g16470	Cc1g01052	Cx1g013360	.	Cm1g026930	Ab4g29298	.	.	.	.	.	.	.	.	.	.	.	.
Cs1g16480	Cc1g01051	Cx1g013350	Ci1g172460	Cm1g026940	Ab4g29295	.	.	.	.	.	.	.	.	.	.	.	.
Cs1g16490	Cc1g01048	Cx1g013330	Ci1g172470	Cm1g026960	Ab4g29442	.	.	.	.	.	.	.	.	.	.	.	.
Cs1g16500	Cc1g01046	Cx1g013310	Ci1g172490	Cm1g026980	Ab4g29397	.	.	.	.	.	.	.	.	.	.	.	.
Cs1g16510	Cc1g01044	Cx1g013300	Ci1g172510	.	Ab4g29399	.	.	.	.	.	.	.	.	.	.	.	.
Cs1g16520	.	.	.	.	.	.	.	.	.	.	.	.	.	.	.	.	.
Cs1g16530	Cc1g01043	Cx1g013290	Ci1g172520	Cm1g247680	.	.	.	.	.	.	.	.	.	.	.	.	.
Cs1g16540	Cc1g01041	Cx1g013260	Ci1g172540	Cm1g247700	Ab4g29274	.	.	.	.	.	.	.	.	.	.	.	.
Cs1g16550	.	.	.	Cm1g247710	Ab4g29451	.	.	.	.	.	.	.	.	.	.	.	.
Cs1g16560	.	.	.	Cm1g247720	Ab4g29520	.	.	.	.	.	.	.	.	.	.	.	.
Cs1g16570	Cc1g01038	Cx1g013230	Ci1g172570	Cm1g247730	Ab4g29293	.	.	.	.	.	.	.	.	.	.	.	.
Cs1g16580	Cc1g01037	Cx1g013220	Ci1g172580	Cm1g247750	Ab4g29537	.	.	.	.	.	.	.	.	.	.	.	.
Cs1g16590	Cc1g01035	Cx1g013210	Ci1g172590	Cm1g247760	Ab4g29508	.	.	.	.	.	.	.	.	.	.	.	.
Cs1g16600	Cc1g01034	Cx1g013200	Ci1g172600	Cm1g247770	Ab4g29290	Cs4g06740	Cc4g01905	Cx4g018190	Ci4g086480	Cm4g125760	Ab4g36000	.	.	.	.	.	.
Cs1g16610	Cc1g01033	Cx1g013190	Ci1g172610	Cm1g247780	Ab4g29355	.	.	.	.	.	.	.	.	.	.	.	.
Cs1g16620	Cc1g01031	Cx1g013180	Ci1g172620	Cm1g247790	Ab4g29423	.	.	.	.	.	.	.	.	.	.	.	.
Cs1g16630	Cc1g01030	Cx1g013170	.	.	Ab4g29264	.	.	.	.	.	.	.	.	.	.	.	.
Cs1g16640	Cc1g01029	.	Ci1g172630	Cm1g247800	Ab4g29356	.	.	.	.	.	.	.	.	.	.	.	.
Cs1g16650	Cc1g01028	Cx1g013160	Ci1g172640	Cm1g247810	Ab4g29394	.	.	.	.	.	.	.	.	.	.	.	.
Cs1g16660	Cc1g01027	Cx1g013150	Ci1g172650	.	Ab4g29430	.	.	.	.	.	.	.	.	.	.	.	.
Cs1g16670	.	.	.	.	.	.	.	.	.	.	.	.	.	.	.	.	.
Cs1g16680	.	Cx1g013130	.	.	.	.	.	.	.	.	.	.	.	.	.	.	.
Cs1g16690	Cc1g01024	Cx1g013120	.	Cm1g247830	Ab4g29412	.	.	.	.	.	.	.	.	.	.	.	.
Cs1g16700	Cc1g01023	Cx1g013110	Ci1g172690	Cm1g247840	Ab4g29368	.	.	.	.	.	.	.	.	.	.	.	.
Cs1g16710	.	.	.	.	.	.	.	.	.	.	.	.	.	.	.	.	.
Cs1g16720	.	.	.	.	.	.	.	.	.	.	.	.	.	.	.	.	.
Cs1g16730	.	.	.	.	.	.	.	.	.	.	.	.	.	.	.	.	.
Cs1g16740	.	Cx1g013060	Ci1g172730	.	.	.	.	.	.	.	.	.	.	.	.	.	.
Cs1g16750	Cc1g01018	Cx1g013050	Ci1g172740	Cm1g261450	Ab4g29336	Cs4g06820	Cc4g01893	.	Ci4g086400	Cm4g125680	Ab4g36042	.	.	.	.	.	.
Cs1g16760	Cc1g01017	Cx1g013040	Ci1g172750	Cm1g261460	Ab4g29515	.	.	.	.	.	.	.	.	.	.	.	.
Cs1g16770	Cc1g01016	Cx1g013030	Ci1g172760	Cm1g261470	Ab4g29460	.	.	.	.	.	.	.	.	.	.	.	.
Cs1g16780	Cc1g01015	Cx1g013020	Ci1g294960	Cm1g261480	Ab4g29512	.	.	.	.	.	.	.	.	.	.	.	.
Cs1g16790	Cc1g01014	Cx1g013010	Ci1g294970	Cm1g261490	Ab4g29262	.	.	.	.	.	.	.	.	.	.	.	.
Cs1g16800	Cc1g01013	Cx1g013000	Ci1g294980	Cm1g261510	Ab4g29414	.	.	.	.	.	.	.	.	.	.	.	.
Cs1g16810	Cc1g01012	Cx1g012980	Ci1g294990	Cm1g261520	Ab4g29513	.	.	.	.	.	.	.	.	.	.	.	.
Cs1g16820	Cc1g01011	Cx1g012970	.	Cm1g261530	Ab4g29300	.	.	.	.	.	.	.	.	.	.	.	.
Cs1g16830	Cc1g01010	Cx1g012960	.	Cm1g262590	Ab4g29518	.	.	.	.	.	.	.	.	.	.	.	.
Cs1g16840	Cc1g01008	Cx1g012940	.	Cm1g262610	Ab4g29365	.	.	.	.	.	.	.	.	.	.	.	.
Cs1g16850	.	.	.	.	.	.	.	.	.	.	.	.	.	.	.	.	.
Cs1g16860	Cc1g01006	Cx1g012920	.	Cm1g262630	Ab4g29317	Cs4g06550	.	.	.	.	.	.	.	.	.	.	.
Cs1g16870	Cc1g01005	Cx1g012910	.	Cm1g262640	Ab4g29380	.	.	.	.	.	.	.	.	.	.	.	.
Cs1g16880	Cc1g01003	Cx1g012900	.	Cm1g262650	Ab4g29458	.	.	.	.	.	.	.	.	.	.	.	.
Cs1g16890	Cc1g01002	Cx1g012890	Ci4g086190	Cm1g262660	.	Cs4g07000	Cc4g01875	Cx4g017910	Ci4g086190	.	Ab4g35983	.	.	.	.	.	.
Cs1g16900	.	Cx1g012880	Ci1g276570	Cm1g262670	Ab4g29392	.	.	.	.	.	.	.	.	.	.	.	.
Cs1g16910	Cc1g01001	.	Ci1g276580	.	.	.	.	.	.	.	.	.	.	.	.	.	.
Cs1g16920	.	Cx1g012870	.	.	Ab4g29404	.	.	.	.	.	.	.	.	.	.	.	.
Cs1g16930	Cc1g01000	.	.	.	.	.	.	.	.	.	.	.	.	.	.	.	.
Cs1g16940	.	Cx1g011110	.	.	Ab4g29307	.	.	.	.	.	.	.	.	.	.	.	.
Cs1g16950	Cc1g00999	.	.	Cm1g219530	Ab4g29385	.	.	.	.	.	.	.	.	.	.	.	.
Cs1g16960	Cc1g00998	.	.	.	.	.	.	.	.	.	.	.	.	.	.	.	.
Cs1g16970	Cc1g00997	Cx1g012860	.	.	.	.	.	.	.	.	.	.	.	.	.	.	.
Cs1g16980	Cc1g00995	Cx1g012850	.	Cm1g219540	.	.	.	.	.	.	.	.	.	.	.	.	.
Cs1g16990	.	Cx1g012840	.	.	Ab4g29500	.	.	.	.	.	.	.	.	.	.	.	.
Cs1g17000	.	.	.	.	.	.	.	.	.	.	.	.	.	.	.	.	.
Cs1g17010	Cc1g00993	.	Ci1g233540	.	Ab4g29280	.	.	.	.	.	.	.	.	.	.	.	.
Cs1g17020	.	.	Ci1g233550	.	.	.	.	.	.	.	.	.	.	.	.	.	.
Cs1g17030	.	.	.	.	.	.	.	.	.	.	.	.	.	.	.	.	.
Cs1g17040	Cc1g00991	Cx1g011060	Ci1g233600	.	.	.	.	.	.	.	.	.	.	.	.	.	.
Cs1g17050	Cc1g00990	Cx1g011050	Ci1g289950	Cm1g219550	.	.	.	.	.	.	.	.	.	.	.	.	.
Cs1g17060	.	.	Ci1g289960	Cm1g219560	.	.	.	.	.	.	.	.	.	.	.	.	.
Cs1g17070	Cc1g00988	.	Ci1g289970	Cm1g219570	Ab1g27090	.	.	.	.	.	.	.	.	.	.	.	.
Cs1g17080	.	.	.	.	.	.	.	.	.	.	.	.	.	.	.	.	.
Cs1g17090	Cc1g00987	Cx1g011020	Ci1g289980	.	.	.	.	.	.	.	.	.	.	.	.	.	.
Cs1g17100	Cc1g00986	Cx1g010980	.	Cm1g219630	.	.	.	.	.	.	.	.	.	.	.	.	.
Cs1g17110	.	.	.	.	.	.	.	.	.	.	.	.	.	.	.	.	.
Cs1g17120	.	Cx1g010940	.	.	.	.	.	.	.	.	.	.	.	.	.	.	.
Cs1g17123	.	.	.	.	.	.	.	.	.	.	.	.	.	.	.	.	.
Cs1g17126	.	.	.	.	.	.	.	.	.	.	.	.	.	.	.	.	.
Cs1g17130	.	Cx1g010910	.	.	.	.	.	.	.	.	.	.	.	.	.	.	.
Cs1g17140	.	.	.	.	.	.	.	.	.	.	.	.	.	.	.	.	.
Cs1g17150	Cc1g00981	Cx1g010890	.	.	Ab4g29400	.	.	.	.	.	.	.	.	.	.	.	.
Cs1g17160	Cc1g00980	Cx1g010880	.	.	Ab4g29363	.	.	.	.	.	.	.	.	.	.	.	.
Cs1g17170	Cc1g00979	Cx1g010860	.	.	Ab4g29532	.	.	.	.	.	.	.	.	.	.	.	.
Cs1g17180	.	.	.	.	.	.	.	.	.	.	.	.	.	.	.	.	.
Cs1g17190	Cc1g00976	.	.	.	Ab4g29273	.	.	.	.	.	.	.	.	.	.	.	.
Cs1g17200	Cc1g00975	Cx1g010840	Ci4g086080	Cm4g220820	Ab4g29478	Cs4g07110	Cc4g01865	Cx4g017790	Ci4g086080	Cm1g157640	Ab4g35953	.	.	.	.	.	.
Cs1g17210	Cc1g00974	Cx1g010830	Ci4g086070	Cm4g220810	Ab4g29533	.	.	.	.	.	.	.	.	.	.	.	.
Cs1g17220	Cc1g00973	Cx1g010820	.	.	Ab4g29402	.	.	.	.	.	.	.	.	.	.	.	.
Cs1g17230	.	.	.	.	.	.	.	.	.	.	.	.	.	.	.	.	.
Cs1g17240	Cc1g00971	Cx1g010800	.	.	Ab4g29473	.	.	.	.	.	.	.	.	.	.	.	.
Cs1g17250	Cc1g00970	Cx1g010790	.	.	.	.	.	.	.	.	.	.	.	.	.	.	.
Cs1g17260	Cc1g00969	Cx1g010780	Ci4g086010	Cm4g220750	.	Cs4g07190	Cc4g01857	Cx4g017710	Ci4g086010	Cm1g157590	Ab4g30381	.	.	.	.	.	.
Cs1g17270	Cc1g00968	Cx1g010770	Ci4g086000	Cm4g220740	Ab4g29459	Cs4g07200	Cc4g01856	Cx4g017700	Ci4g086000	Cm1g157580	Ab4g30242	.	.	.	.	.	.
Cs1g17280	Cc1g00967	Cx1g010760	.	.	Ab4g29268	.	.	.	.	.	.	.	.	.	.	.	.
Cs1g17290	Cc1g00966	.	Ci4g085970	Cm4g220720	Ab4g29374	Cs4g07220	Cc4g01854	Cx4g017680	Ci4g085970	Cm1g157560	Ab4g30814	.	.	.	.	.	.
Cs1g17300	Cc1g00965	Cx1g010750	Ci4g085930	Cm4g220680	Ab4g29313	Cs4g07260	Cc4g01851	Cx4g017640	Ci4g085930	Cm1g157550	Ab4g30834	.	.	.	.	.	.
Cs1g17310	Cc1g00964	Cx1g010740	.	Cm1g157540	Ab4g29496	.	.	.	.	.	.	.	.	.	.	.	.
Cs1g17320	Cc1g00963	Cx1g010730	Ci4g085880	Cm4g126090	Ab4g29419	Cs4g06340	Cc4g01947	Cx4g018600	Ci4g086870	Cm4g126090	Ab4g36081	.	.	.	.	.	.
Cs1g17330	Cc1g00962	Cx1g010720	.	.	Ab4g29511	Cs1g08950	Cc3g00552	Cx1g023480	Ci1g191950	.	Ab1g28545	.	.	.	.	.	.
Cs1g17340	Cc1g00961	Cx1g010710	.	.	Ab4g29516	.	.	.	.	.	.	.	.	.	.	.	.
Cs1g17345	.	Cx1g010700	.	.	Ab4g29302	.	.	.	.	.	.	.	.	.	.	.	.
Cs1g17350	.	.	.	.	.	.	.	.	.	.	.	.	.	.	.	.	.
Cs1g17360	Cc1g00959	Cx1g010680	Ci4g085840	.	Ab4g29519	Cs4g07360	Cc4g01842	.	Ci4g085840	Cm1g157480	Ab4g30457	.	.	.	.	.	.
Cs1g17370	.	.	.	.	.	.	.	.	.	.	.	.	.	.	.	.	.
Cs1g17380	Cc1g00957	Cx1g010660	.	.	.	.	.	.	.	.	.	.	.	.	.	.	.
Cs1g17390	.	.	.	.	.	.	.	.	.	.	.	.	.	.	.	.	.
Cs1g17400	Cc1g00955	.	.	.	.	.	.	.	.	.	.	.	.	.	.	.	.
Cs1g17410	.	.	.	.	.	.	.	.	.	.	.	.	.	.	.	.	.
Cs1g17420	.	.	.	.	.	.	.	.	.	.	.	.	.	.	.	.	.
Cs1g17430	Cc1g00952	Cx1g010600	.	.	.	.	.	.	.	.	.	.	.	.	.	.	.
Cs1g17440	Cc1g00951	Cx1g010590	.	.	.	.	.	.	.	.	.	.	.	.	.	.	.
Cs1g17450	Cc1g00950	Cx1g010580	.	.	.	.	.	.	.	.	.	.	.	.	.	.	.
Cs1g17460	.	.	.	.	.	.	.	.	.	.	.	.	.	.	.	.	.
Cs1g17470	Cc1g00948	Cx1g010560	.	.	.	.	.	.	.	.	.	.	.	.	.	.	.
Cs1g17480	Cc1g00946	Cx1g010550	.	.	.	.	.	.	.	.	.	.	.	.	.	.	.
Cs1g17490	Cc1g00945	Cx1g010540	.	.	.	.	.	.	.	.	.	.	.	.	.	.	.
Cs1g17500	Cc1g00944	Cx1g010530	.	.	.	.	.	.	.	.	.	.	.	.	.	.	.
Cs1g17510	Cc1g00943	Cx1g010520	.	Cm4g086450	.	Cs4g06310	Cc4g01950	.	.	.	Ab4g35908	.	.	.	.	.	.
Cs1g17520	Cc1g00942	Cx1g010510	Ci1g255760	.	Ab1g24852	.	.	.	.	.	.	.	.	.	.	.	.
Cs1g17530	Cc1g00941	Cx1g010500	Ci1g255770	.	Ab1g24846	.	.	.	.	.	.	.	.	.	.	.	.
Cs1g17540	Cc1g00940	Cx1g010490	.	Cm2g252130	.	.	.	.	.	.	.	.	.	.	.	.	.
Cs1g17550	Cc1g00939	Cx1g010480	.	.	Ab1g17001	.	.	.	.	.	.	.	.	.	.	.	.
Cs1g17560	Cc1g00936	Cx1g010470	.	.	Ab1g16801	.	.	.	.	.	.	.	.	.	.	.	.
Cs1g17570	Cc1g00935	Cx1g010460	.	.	.	.	.	.	.	.	.	.	.	.	.	.	.
Cs1g17580	Cc1g00934	Cx1g010450	.	.	Ab1g16935	.	.	.	.	.	.	.	.	.	.	.	.
Cs1g17590	.	.	.	.	.	.	.	.	.	.	.	.	.	.	.	.	.
Cs1g17600	Cc1g00932	Cx1g010420	.	.	Ab1g17008	.	.	.	.	.	.	.	.	.	.	.	.
Cs1g17610	Cc1g00929	Cx1g010410	.	.	Ab1g16822	.	.	.	.	.	.	.	.	.	.	.	.
Cs1g17615	Cc1g00928	Cx1g010400	.	.	.	.	.	.	.	.	.	.	.	.	.	.	.
Cs1g17620	.	.	.	.	Ab1g16894	.	.	.	.	.	.	.	.	.	.	.	.
Cs1g17630	Cc1g00927	Cx1g010390	.	Cm2g252120	.	.	.	.	.	.	.	.	.	.	.	.	.
Cs1g17640	Cc1g00926	Cx1g010380	.	.	Ab1g16934	.	.	.	.	.	.	.	.	.	.	.	.
Cs1g17650	Cc1g00925	Cx1g010370	.	.	Ab1g16882	.	.	.	.	.	.	.	.	.	.	.	.
Cs1g17660	Cc1g00924	Cx1g010360	.	.	Ab1g16825	.	.	.	.	.	.	.	.	.	.	.	.
Cs1g17665	.	.	.	.	.	.	.	.	.	.	.	.	.	.	.	.	.
Cs1g17670	Cc1g00922	Cx1g010350	.	.	Ab1g17051	.	.	.	.	.	.	.	.	.	.	.	.
Cs1g17680	Cc1g00921	Cx1g010340	.	.	Ab1g17004	.	.	.	.	.	.	.	.	.	.	.	.
Cs1g17690	.	.	.	.	.	.	.	.	.	.	.	.	.	.	.	.	.
Cs1g17700	.	.	.	.	.	.	.	.	.	.	.	.	.	.	.	.	.
Cs1g17710	Cc1g00917	Cx1g010300	.	Cm4g086740	Ab1g17052	Cs4g05980	Cc4g01980	Cx4g018940	Ci4g249100	Cm4g086740	Ab4g35835	.	.	.	.	.	.
Cs1g17720	Cc1g00916	Cx1g010290	.	.	Ab1g16861	.	.	.	.	.	.	.	.	.	.	.	.
Cs1g17730	Cc1g00914	Cx1g010270	.	.	Ab1g16804	.	.	.	.	.	.	.	.	.	.	.	.
Cs1g17740	Cc1g00913	Cx1g010260	Ci1g178580	Cm1g213700	Ab1g17041	.	.	.	.	.	.	.	.	.	.	.	.
Cs1g17750	Cc1g00912	Cx1g010250	Ci1g178590	Cm1g213710	Ab1g16901	.	.	.	.	.	.	.	.	.	.	.	.
Cs1g17760	Cc1g00910	Cx1g010240	.	.	Ab1g16865	.	.	.	.	.	.	.	.	.	.	.	.
Cs1g17770	Cc1g00909	Cx1g010230	Ci4g249180	Cm4g222920	Ab1g16773	.	.	.	.	.	.	.	.	.	.	.	.
Cs1g17780	Cc1g00908	Cx1g010210	.	.	Ab1g16991	.	.	.	.	.	.	.	.	.	.	.	.
Cs1g17790	Cc1g00907	Cx1g010200	.	Cm4g086800	Ab1g16922	Cs4g05930	Cc4g01985	Cx4g019010	Ci4g249150	Cm4g086800	Ab4g35891	.	.	.	.	.	.
Cs1g17800	Cc1g00906	Cx1g010190	.	Cm4g086810	Ab1g16750	Cs4g05920	Cc4g01986	Cx4g019020	Ci4g249160	Cm4g086810	Ab4g36041	Cs1g08760	.	.	.	.	.
Cs1g17810	Cc1g00905	Cx1g010180	.	.	.	.	.	.	.	.	.	.	.	.	.	.	.
Cs1g17820	.	Cx1g010170	.	.	Ab1g17023	.	.	.	.	.	.	.	.	.	.	.	.
Cs1g17830	Cc1g00904	Cx1g010160	.	.	Ab1g16990	Cs4g15110	.	Cx1g010160	Ci4g213970	Cm4g206290	Ab4g23924	.	.	.	.	.	.
Cs1g17840	Cc1g00903	Cx1g010150	Ci1g059830	.	Ab1g16776	Cs4g15090	Cc4g00968	Cx1g010150	Ci4g213950	Cm4g206310	Ab4g23794	.	.	.	.	.	.
Cs1g17850	Cc1g00902	Cx1g010140	Ci1g059840	Cm4g086990	Ab1g16850	Cs4g05700	Cc4g01999	Cx4g019250	Ci4g249320	Cm4g086990	Ab4g35867	.	.	.	.	.	.
Cs1g17860	Cc1g00901	Cx1g010130	.	.	Ab1g16902	.	.	.	.	.	.	.	.	.	.	.	.
Cs1g17870	Cc1g00900	.	.	.	Ab1g16826	Cs4g15040	Cc4g00965	.	Ci4g249470	Cm4g163850	Ab1g16826	.	.	.	.	.	.
Cs1g17880	Cc1g00899	Cx1g010120	Ci1g059860	.	Ab1g16869	.	.	.	.	.	.	.	.	.	.	.	.
Cs1g17890	Cc1g00898	Cx1g010110	Ci1g059870	Cm4g087000	Ab1g16808	.	.	.	.	.	.	.	.	.	.	.	.
Cs1g17900	.	.	.	.	.	.	.	.	.	.	.	.	.	.	.	.	.
Cs1g17910	Cc1g00896	Cx1g010090	Ci1g059890	Cm4g087080	Ab1g16928	Cs4g05600	Cc4g02007	Cx4g019340	Ci4g154230	Cm4g087080	Ab4g35911	.	.	.	.	.	.
Cs1g17920	Cc1g00895	Cx1g010080	Ci1g059900	Cm1g291100	Ab1g16996	.	.	.	.	.	.	.	.	.	.	.	.
Cs1g17930	Cc1g00894	Cx1g010070	Ci1g059910	.	Ab1g16791	.	.	.	.	.	.	.	.	.	.	.	.
Cs1g17940	Cc1g00893	Cx1g010060	Ci1g059920	.	Ab1g16858	Cs4g14820	.	Cx1g010060	.	.	Ab4g23838	.	.	.	.	.	.
Cs1g17950	Cc1g00892	Cx1g010050	Ci1g059940	.	Ab1g16988	.	.	.	.	.	.	.	.	.	.	.	.
Cs1g17960	Cc1g00891	Cx1g010040	Ci1g059950	.	Ab1g16784	.	.	.	.	.	.	.	.	.	.	.	.
Cs1g17970	Cc1g00890	Cx1g010030	Ci1g059960	Cm4g087090	Ab1g16886	.	.	.	.	.	.	.	.	.	.	.	.
Cs1g17980	Cc1g00889	Cx1g010020	Ci1g059970	.	Ab1g16911	.	.	.	.	.	.	.	.	.	.	.	.
Cs1g17990	Cc1g00888	Cx1g010010	Ci1g059980	.	Ab1g17000	Cs4g14680	Cc4g00942	Cx1g010010	.	Cm4g189610	Ab4g23931	.	.	.	.	.	.
Cs1g18000	Cc1g00887	Cx1g010000	Ci1g059990	.	Ab1g17055	.	.	.	.	.	.	.	.	.	.	.	.
Cs1g18010	Cc1g00886	.	Ci1g060000	.	Ab1g17012	.	.	.	.	.	.	.	.	.	.	.	.
Cs1g18020	Cc1g00885	Cx1g009990	.	.	Ab1g16795	.	.	.	.	.	.	.	.	.	.	.	.
Cs1g18030	.	Cx1g009980	.	.	.	.	.	.	.	.	.	.	.	.	.	.	.
Cs1g18040	Cc1g00884	Cx1g009970	Ci1g060010	.	Ab1g16838	.	.	.	.	.	.	.	.	.	.	.	.
Cs1g18050	Cc1g00883	Cx1g009950	Ci1g060040	.	Ab1g16763	Cs4g14630	Cc4g00940	.	Ci4g176420	Cm4g127130	Ab4g23814	Cs3g05640	Cc3g00297	Cx3g001720	Ci3g231800	Cm3g277630	.
Cs1g18060	.	.	.	.	.	.	.	.	.	.	.	.	.	.	.	.	.
Cs1g18070	Cc1g00881	Cx1g009930	.	.	Ab1g16856	.	.	.	.	.	.	.	.	.	.	.	.
Cs1g18080	Cc1g00880	Cx1g009920	Ci1g060070	.	Ab1g16802	.	.	.	.	.	.	.	.	.	.	.	.
Cs1g18090	Cc1g00879	Cx1g009910	Ci1g060080	.	Ab1g16780	.	.	.	.	.	.	.	.	.	.	.	.
Cs1g18100	Cc1g00877	Cx1g009890	Ci1g060110	Cm2g201020	Ab1g16743	.	.	.	.	.	.	.	.	.	.	.	.
Cs1g18110	Cc1g00876	Cx1g009880	Ci1g060120	.	Ab1g16824	.	.	.	.	.	.	.	.	.	.	.	.
Cs1g18120	.	.	.	.	.	.	.	.	.	.	.	.	.	.	.	.	.
Cs1g18130	Cc1g00873	Cx1g009860	Ci1g060140	.	Ab1g16992	.	.	.	.	.	.	.	.	.	.	.	.
Cs1g18140	Cc1g00871	Cx1g009850	Ci1g060160	Cm2g200710	Ab1g16881	Cs1g08410	.	.	.	Cm1g172660	Ab1g20775	.	.	.	.	.	.
Cs1g18150	.	.	.	.	.	.	.	.	.	.	.	.	.	.	.	.	.
Cs1g18160	.	Cx1g009830	Ci1g060180	Cm2g196630	Ab1g17032	.	.	.	.	.	.	.	.	.	.	.	.
Cs1g18170	Cc1g00869	Cx1g009820	Ci1g060190	.	Ab1g16956	.	.	.	.	.	.	.	.	.	.	.	.
Cs1g18180	Cc1g00868	Cx1g009810	.	.	.	.	.	.	.	.	.	.	.	.	.	.	.
Cs1g18190	Cc1g00867	Cx1g009800	Ci1g060200	.	Ab1g16799	Cs1g08390	Cc3g00591	Cx1g024320	.	Cm1g172650	Ab1g20772	.	.	.	.	.	.
Cs1g18200	Cc1g00866	Cx1g009790	.	.	Ab1g16971	.	.	.	.	.	.	.	.	.	.	.	.
Cs1g18210	Cc1g00865	Cx1g009780	Ci1g249970	.	Ab1g17039	.	.	.	.	.	.	.	.	.	.	.	.
Cs1g18220	Cc1g00863	Cx1g009770	Ci1g060230	.	Ab1g16828	.	.	.	.	.	.	.	.	.	.	.	.
Cs1g18230	Cc1g00862	Cx1g009760	Ci1g060240	Cm1g123400	Ab1g17053	.	.	.	.	.	.	.	.	.	.	.	.
Cs1g18240	Cc1g00861	.	Ci1g060250	Cm1g123410	.	Cs4g18340	Cc4g00520	Cx4g006840	Ci4g176470	Cm4g147350	Ab4g31823	.	.	.	.	.	.
Cs1g18250	Cc1g00859	Cx1g009740	Ci1g060280	.	Ab1g16809	.	.	.	.	.	.	.	.	.	.	.	.
Cs1g18260	Cc1g00858	Cx1g009730	Ci1g060300	.	Ab1g17024	Cs4g14180	Cc4g00915	Cx4g009110	.	Cm1g123370	Ab4g23760	.	.	.	.	.	.
Cs1g18270	Cc1g00857	Cx1g009720	Ci1g060310	.	Ab1g16816	.	.	.	.	.	.	.	.	.	.	.	.
Cs1g18280	Cc1g00856	Cx1g009710	Ci1g060320	.	Ab1g16952	.	.	.	.	.	.	.	.	.	.	.	.
Cs1g18290	Cc1g00855	.	Ci1g254240	.	Ab1g16755	.	.	.	.	.	.	.	.	.	.	.	.
Cs1g18300	Cc1g00854	Cx1g009700	Ci1g254230	.	Ab1g16775	Cs4g14090	Cc4g00908	Cx4g009190	Ci4g158950	Cm1g123340	.	Cs1g08380	Cc3g00592	Cx1g024330	.	Cm1g172640	Ab1g20757
Cs1g18310	Cc1g00850	Cx1g009680	Ci1g254200	.	Ab1g16963	.	.	.	.	.	.	.	.	.	.	.	.
Cs1g18320	.	.	Ci1g254190	.	.	.	.	.	.	.	.	.	.	.	.	.	.
Cs1g18330	Cc1g00849	Cx1g009670	Ci1g254180	Cm1g298390	Ab1g17047	.	.	.	.	.	.	.	.	.	.	.	.
Cs1g18340	Cc1g00848	Cx1g009660	Ci1g254170	.	Ab1g16953	.	.	.	.	.	.	.	.	.	.	.	.
Cs1g18350	Cc1g00847	Cx1g009650	Ci1g254160	.	Ab1g16923	Cs4g14070	Cc4g00906	Cx4g009210	Ci4g158920	Cm1g123300	Ab1g16923	.	.	.	.	.	.
Cs1g18360	Cc1g00846	Cx1g009640	Ci1g254150	.	Ab1g16779	.	.	.	.	.	.	.	.	.	.	.	.
Cs1g18370	.	Cx1g009630	.	.	.	.	.	.	.	.	.	.	.	.	.	.	.
Cs1g18380	.	.	.	.	Ab1g16846	.	.	.	.	.	.	.	.	.	.	.	.
Cs1g18390	Cc1g00845	Cx1g009610	Ci1g254140	.	Ab1g16939	.	.	.	.	.	.	.	.	.	.	.	.
Cs1g18400	Cc1g00844	Cx1g009600	Ci1g254130	Cm4g086010	Ab1g16913	Cs4g18590	Cc4g00490	Cx4g006590	Ci4g176720	Cm1g123270	Ab4g31791	.	.	.	.	.	.
Cs1g18410	Cc1g00843	Cx1g009590	Ci1g254120	.	Ab1g16800	Cs3g06100	.	.	Ci3g190120	Cm3g113420	Ab3g27475	.	.	.	.	.	.
Cs1g18420	Cc1g00842	.	Ci1g254100	.	Ab1g16853	Cs4g13910	Cc4g00897	Cx4g009280	Ci4g158830	.	Ab1g16853	.	.	.	.	.	.
Cs1g18430	Cc1g00841	Cx1g009570	Ci1g254090	.	Ab1g16964	.	.	.	.	.	.	.	.	.	.	.	.
Cs1g18440	.	.	.	.	.	.	.	.	.	.	.	.	.	.	.	.	.
Cs1g18450	.	.	.	.	.	.	.	.	.	.	.	.	.	.	.	.	.
Cs1g18460	.	.	.	.	.	.	.	.	.	.	.	.	.	.	.	.	.
Cs1g18470	Cc1g00835	Cx1g009520	Ci1g254030	Cm4g085970	Ab1g16975	Cs4g18640	Cc4g00486	Cx4g006500	.	Cm1g123170	Ab4g31819	.	.	.	.	.	.
Cs1g18480	Cc1g00833	Cx1g009500	Ci1g254020	.	.	.	.	.	.	.	.	.	.	.	.	.	.
Cs1g18490	Cc1g00829	Cx1g009490	Ci7g203260	.	.	.	.	.	.	.	.	.	.	.	.	.	.
Cs1g18500	.	.	.	.	Ab1g16969	.	.	.	.	.	.	.	.	.	.	.	.
Cs1g18510	Cc1g00828	Cx1g009480	Ci7g203270	.	.	.	.	.	.	.	.	.	.	.	.	.	.
Cs1g18520	.	.	Ci7g203280	Cm1g274440	.	.	.	.	.	.	.	.	.	.	.	.	.
Cs1g18530	Cc1g00827	Cx1g009470	Ci7g203290	.	Ab1g16966	.	.	.	.	.	.	.	.	.	.	.	.
Cs1g18540	Cc1g00826	Cx1g009460	Ci7g203300	.	Ab1g16871	Cs4g13590	Cc4g00881	Cx4g015050	Ci4g264790	Cm1g123140	Ab4g24464	.	.	.	.	.	.
Cs1g18550	Cc1g00825	Cx1g009450	Ci7g203310	Cm4g085920	Ab1g16819	Cs4g18680	Cc4g00482	Cx4g006460	Ci4g212620	Cm1g123120	Ab4g31775	.	.	.	.	.	.
Cs1g18560	Cc1g00823	Cx1g009440	.	Cm4g085910	.	Cs4g18700	.	Cx4g006440	Ci4g212630	Cm1g123110	Ab4g31862	.	.	.	.	.	.
Cs1g18570	Cc1g00822	Cx1g009430	Ci7g203340	Cm4g085890	Ab1g16930	Cs4g13470	Cc4g00871	Cx7g009410	Ci4g212650	Cm4g085890	Ab4g15578	.	.	.	.	.	.
Cs1g18580	Cc1g00821	Cx1g009420	Ci7g203350	.	Ab1g16851	.	.	.	.	.	.	.	.	.	.	.	.
Cs1g18590	.	Cx1g009410	.	.	.	.	.	.	.	.	.	.	.	.	.	.	.
Cs1g18600	.	.	.	.	.	.	.	.	.	.	.	.	.	.	.	.	.
Cs1g18610	.	.	.	.	.	.	.	.	.	.	.	.	.	.	.	.	.
Cs1g18620	Cc1g00819	Cx1g009380	Ci1g022720	.	Ab1g17038	.	.	.	.	.	.	.	.	.	.	.	.
Cs1g18630	Cc1g00818	Cx1g009370	Ci1g022730	.	Ab1g16783	.	.	.	.	.	.	.	.	.	.	.	.
Cs1g18640	Cc1g00817	Cx1g009360	Ci1g022740	.	Ab1g16900	.	.	.	.	.	.	.	.	.	.	.	.
Cs1g18650	.	.	.	.	.	.	.	.	.	.	.	.	.	.	.	.	.
Cs1g18660	Cc1g00816	Cx1g009350	Ci1g022750	.	Ab1g16987	.	.	.	.	.	.	.	.	.	.	.	.
Cs1g18670	Cc1g00815	Cx1g009340	Ci1g022760	.	Ab1g16815	.	.	.	.	.	.	.	.	.	.	.	.
Cs1g18675	.	.	.	.	.	.	.	.	.	.	.	.	.	.	.	.	.
Cs1g18680	.	.	Ci1g022780	.	Ab1g16866	.	.	.	.	.	.	.	.	.	.	.	.
Cs1g18690	Cc1g00813	Cx1g009330	.	.	Ab1g16949	.	.	.	.	.	.	.	.	.	.	.	.
Cs1g18700	Cc1g00812	Cx1g009310	Ci1g022790	Cm1g304150	Ab1g16954	.	.	.	.	.	.	.	.	.	.	.	.
Cs1g18710	Cc1g00811	Cx1g009300	Ci1g022800	Cm1g304160	Ab1g17025	.	.	.	.	.	.	.	.	.	.	.	.
Cs1g18720	Cc1g00810	Cx1g009290	Ci1g022810	.	Ab1g16878	.	.	.	.	.	.	.	.	.	.	.	.
Cs1g18730	Cc1g00809	Cx1g009280	Ci1g022820	Cm4g085730	Ab1g16782	Cs4g18830	Cc4g00468	.	Ci4g212810	Cm1g122940	Ab4g31786	.	.	.	.	.	.
Cs1g18740	.	Cx1g009270	.	.	.	Cs4g13240	Cc4g00851	Cx5g017220	Ci4g274690	Cm4g146530	.	.	.	.	.	.	.
Cs1g18750	Cc1g00807	Cx1g009260	Ci1g022830	.	Ab1g17044	.	.	.	.	.	.	.	.	.	.	.	.
Cs1g18760	Cc5g01503	Cx8g017270	.	.	Ab1g10548	.	.	.	.	.	.	.	.	.	.	.	.
Cs1g18770	.	.	.	.	.	.	.	.	.	.	.	.	.	.	.	.	.
Cs1g18780	Cc5g01508	Cx8g017280	.	.	Ab1g10544	.	.	.	.	.	.	.	.	.	.	.	.
Cs1g18790	.	.	.	.	.	.	.	.	.	.	.	.	.	.	.	.	.
Cs1g18800	Cc5g01509	.	.	.	.	Cs4g13200	.	.	.	.	.	.	.	.	.	.	.
Cs1g18810	.	.	.	.	.	Cs3g06200	.	.	.	.	Ab3g26681	.	.	.	.	.	.
Cs1g18820	.	.	.	.	.	.	.	.	.	.	.	.	.	.	.	.	.
Cs1g18825	.	.	.	.	.	.	.	.	.	.	.	.	.	.	.	.	.
Cs1g18830	.	.	.	.	.	.	.	.	.	.	.	.	.	.	.	.	.
Cs1g18840	.	.	.	.	.	.	.	.	.	.	.	.	.	.	.	.	.
Cs1g18850	Cc5g01514	Cx8g017320	.	.	Ab1g10550	.	.	.	.	.	.	.	.	.	.	.	.
Cs1g18860	Cc5g01515	Cx8g017330	.	.	Ab1g10555	.	.	.	.	.	.	.	.	.	.	.	.
Cs1g18870	Cc5g01516	Cx8g017340	.	.	Ab1g10545	.	.	.	.	.	.	.	.	.	.	.	.
Cs1g18880	.	.	.	.	.	.	.	.	.	.	.	.	.	.	.	.	.
Cs1g18890	Cc5g01517	.	.	.	Ab1g10557	.	.	.	.	.	.	.	.	.	.	.	.
Cs1g18900	Cc5g01518	Cx8g017350	.	.	Ab1g10554	.	.	.	.	.	.	.	.	.	.	.	.
Cs1g18910	.	.	.	.	.	.	.	.	.	.	.	.	.	.	.	.	.
Cs1g18920	.	.	.	.	.	.	.	.	.	.	.	.	.	.	.	.	.
Cs1g18930	.	.	.	.	.	.	.	.	.	.	.	.	.	.	.	.	.
Cs1g18940	.	.	.	.	.	.	.	.	.	.	.	.	.	.	.	.	.
Cs1g18950	.	.	.	.	.	.	.	.	.	.	.	.	.	.	.	.	.
Cs1g18960	.	.	.	.	.	.	.	.	.	.	.	.	.	.	.	.	.
Cs1g18965	.	.	.	.	.	.	.	.	.	.	.	.	.	.	.	.	.
Cs1g18970	.	.	.	.	.	.	.	.	.	.	.	.	.	.	.	.	.
Cs1g18980	.	.	.	.	.	.	.	.	.	.	.	.	.	.	.	.	.
Cs1g18990	.	Cx8g017430	.	.	.	.	.	.	.	.	.	.	.	.	.	.	.
Cs1g19000	.	.	.	.	.	.	.	.	.	.	.	.	.	.	.	.	.
Cs1g19010	Cc5g01525	Cx8g017450	.	.	Ab1g19436	.	.	.	.	.	.	.	.	.	.	.	.
Cs1g19020	.	Cx8g017470	.	.	.	Cs3g06320	.	.	.	.	.	.	.	.	.	.	.
Cs1g19030	.	.	.	.	.	.	.	.	.	.	.	.	.	.	.	.	.
Cs1g19040	.	.	.	.	.	.	.	.	.	.	.	.	.	.	.	.	.
Cs1g19050	.	.	.	.	.	.	.	.	.	.	.	.	.	.	.	.	.
Cs1g19055	.	.	.	.	.	.	.	.	.	.	.	.	.	.	.	.	.
Cs1g19060	Cc1g00804	.	Ci1g022840	Cm4g085700	.	Cs4g18860	Cc4g00466	.	Ci4g212840	.	Ab4g31765	.	.	.	.	.	.
Cs1g19070	Cc1g00802	.	.	.	Ab1g16798	.	.	.	.	.	.	.	.	.	.	.	.
Cs1g19080	Cc1g00801	.	Ci1g022850	Cm1g224590	.	.	.	.	.	.	.	.	.	.	.	.	.
Cs1g19090	Cc1g00800	Cx1g009230	Ci1g022860	Cm1g224600	Ab1g16745	Cs4g18870	Cc4g00464	.	Ci4g212850	.	Ab4g31737	.	.	.	.	.	.
Cs1g19100	Cc1g00799	Cx1g009220	Ci1g022870	Cm1g224610	.	.	.	.	.	.	.	.	.	.	.	.	.
Cs1g19110	Cc1g00798	Cx1g009210	.	Cm1g224620	Ab1g16980	.	.	.	.	.	.	.	.	.	.	.	.
Cs1g19120	Cc1g00797	Cx1g009200	.	.	Ab1g16829	.	.	.	.	.	.	.	.	.	.	.	.
Cs1g19130	Cc1g00796	Cx1g009190	Ci1g022880	Cm4g085670	Ab1g16789	Cs4g18880	Cc4g00462	.	Ci4g212860	.	Ab4g31813	.	.	.	.	.	.
Cs1g19140	Cc1g00795	Cx1g009180	Ci1g022890	.	Ab1g16973	.	.	.	.	.	.	.	.	.	.	.	.
Cs1g19150	Cc1g00794	Cx1g009170	Ci1g022900	.	Ab1g16889	.	.	.	.	.	.	.	.	.	.	.	.
Cs1g19160	.	.	.	.	.	.	.	.	.	.	.	.	.	.	.	.	.
Cs1g19170	.	.	Ci1g022920	.	Ab1g16904	.	.	.	.	.	.	.	.	.	.	.	.
Cs1g19180	.	.	.	.	.	.	.	.	.	.	.	.	.	.	.	.	.
Cs1g19190	.	Cx1g009130	Ci1g022950	.	Ab1g17026	.	.	.	.	.	.	.	.	.	.	.	.
Cs1g19200	.	Cx1g009120	Ci1g022960	.	Ab1g16840	.	.	.	.	.	.	.	.	.	.	.	.
Cs1g19210	.	Cx1g009110	Ci1g022970	.	Ab1g16925	.	.	.	.	.	.	.	.	.	.	.	.
Cs1g19220	.	Cx1g009100	Ci1g022980	.	Ab1g17031	.	.	.	.	.	.	.	.	.	.	.	.
Cs1g19230	Cc1g00786	Cx1g009090	Ci1g022990	.	Ab1g16972	.	.	.	.	.	.	.	.	.	.	.	.
Cs1g19240	.	Cx1g009080	Ci1g023000	.	Ab1g16834	Cs3g18230	Cc3g01978	Cx3g014930	Ci3g081570	Cm3g099460	.	.	.	.	.	.	.
Cs1g19250	.	Cx1g009060	Ci1g023010	.	Ab1g16916	.	.	.	.	.	.	.	.	.	.	.	.
Cs1g19260	.	.	.	.	.	.	.	.	.	.	.	.	.	.	.	.	.
Cs1g19270	.	.	.	.	.	.	.	.	.	.	.	.	.	.	.	.	.
Cs1g19280	.	.	.	.	.	.	.	.	.	.	.	.	.	.	.	.	.
Cs1g19290	.	.	.	.	.	.	.	.	.	.	.	.	.	.	.	.	.
Cs1g19300	Cc1g00781	Cx1g009020	Ci1g023050	.	Ab1g17030	.	.	.	.	.	.	.	.	.	.	.	.
Cs1g19310	Cc1g00780	Cx1g009010	.	.	Ab1g17028	.	.	.	.	.	.	.	.	.	.	.	.
Cs1g19320	Cc1g00779	.	Ci1g023060	.	Ab1g16778	.	.	.	.	.	.	.	.	.	.	.	.
Cs1g19330	.	.	.	.	.	.	.	.	.	.	.	.	.	.	.	.	.
Cs1g19340	Cc1g00778	Cx1g008980	Ci1g023070	.	Ab1g16857	.	.	.	.	.	.	.	.	.	.	.	.
Cs1g19350	.	.	.	.	.	.	.	.	.	.	.	.	.	.	.	.	.
Cs1g19360	Cc1g00776	Cx1g008960	Ci1g023090	.	.	.	.	.	.	.	.	.	.	.	.	.	.
Cs1g19370	.	.	.	.	Ab1g16997	.	.	.	.	.	.	.	.	.	.	.	.
Cs1g19380	.	.	.	.	.	.	.	.	.	.	.	.	.	.	.	.	.
Cs1g19390	Cc1g00774	Cx1g008940	Ci1g023110	.	Ab1g17009	.	.	.	.	.	.	.	.	.	.	.	.
Cs1g19393	Cc1g00773	.	.	.	.	.	.	.	.	.	.	.	.	.	.	.	.
Cs1g19396	.	.	.	.	.	.	.	.	.	.	.	.	.	.	.	.	.
Cs1g19400	.	.	.	.	.	.	.	.	.	.	.	.	.	.	.	.	.
Cs1g19410	Cc1g00771	Cx1g008890	Ci1g023150	.	Ab1g16841	.	.	.	.	.	.	.	.	.	.	.	.
Cs1g19420	.	.	.	.	.	.	.	.	.	.	.	.	.	.	.	.	.
Cs1g19425	.	.	.	.	.	.	.	.	.	.	.	.	.	.	.	.	.
Cs1g19430	Cc1g00770	Cx1g008870	Ci1g023160	.	Ab1g16766	.	.	.	.	.	.	.	.	.	.	.	.
Cs1g19440	Cc1g00769	Cx1g008860	Ci1g023170	.	Ab1g16985	.	.	.	.	.	.	.	.	.	.	.	.
Cs1g19450	.	.	.	.	.	.	.	.	.	.	.	.	.	.	.	.	.
Cs1g19460	Cc1g00766	Cx1g008840	Ci1g023190	.	Ab1g16777	.	.	.	.	.	.	.	.	.	.	.	.
Cs1g19470	Cc1g00764	Cx1g008820	Ci1g023210	.	Ab1g16885	.	.	.	.	.	.	.	.	.	.	.	.
Cs1g19480	.	.	.	.	.	.	.	.	.	.	.	.	.	.	.	.	.
Cs1g19490	Cc1g00762	Cx1g008800	Ci1g023220	.	Ab1g16915	.	.	.	.	.	.	.	.	.	.	.	.
Cs1g19500	Cc1g00761	Cx1g008790	Ci1g023230	.	.	.	.	.	.	.	.	.	.	.	.	.	.
Cs1g19510	.	.	.	.	.	.	.	.	.	.	.	.	.	.	.	.	.
Cs1g19520	.	Cx1g008770	.	.	.	.	.	.	.	.	.	.	.	.	.	.	.
Cs1g19530	Cc1g00759	Cx1g008760	Ci1g023250	.	Ab1g16837	.	.	.	.	.	.	.	.	.	.	.	.
Cs1g19540	.	.	.	.	.	.	.	.	.	.	.	.	.	.	.	.	.
Cs1g19550	Cc1g00757	Cx1g008740	Ci1g023270	.	Ab1g16788	.	.	.	.	.	.	.	.	.	.	.	.
Cs1g19560	Cc1g00756	Cx1g008730	Ci1g023280	.	Ab1g16863	.	.	.	.	.	.	.	.	.	.	.	.
Cs1g19570	Cc1g00755	Cx1g008720	Ci1g023290	.	Ab1g16968	Cs7g04300	Cc7g02154	Cx7g020700	Ci7g015120	Cm7g294410	Ab7g14921	.	.	.	.	.	.
Cs1g19580	Cc1g00754	Cx1g008710	.	Cm1g229810	.	.	.	.	.	.	.	.	.	.	.	.	.
Cs1g19590	Cc1g00753	Cx1g008700	Ci1g023300	Cm1g229820	Ab1g17027	.	.	.	.	.	.	.	.	.	.	.	.
Cs1g19600	Cc1g00752	Cx1g008690	Ci1g023310	Cm1g229830	Ab1g16813	.	.	.	.	.	.	.	.	.	.	.	.
Cs1g19610	Cc1g00750	Cx1g008680	Ci1g023320	.	Ab1g16879	.	.	.	.	.	.	.	.	.	.	.	.
Cs1g19620	Cc1g00749	.	.	.	.	.	.	.	.	.	.	.	.	.	.	.	.
Cs1g19630	Cc1g00748	Cx1g008670	Ci1g023330	.	Ab1g16814	.	.	.	.	.	.	.	.	.	.	.	.
Cs1g19640	.	.	Ci1g023340	.	Ab1g16818	.	.	.	.	.	.	.	.	.	.	.	.
Cs1g19650	.	Cx1g008660	Ci1g023350	.	Ab1g17042	.	.	.	.	.	.	.	.	.	.	.	.
Cs1g19660	Cc1g00747	Cx1g008650	Ci1g023360	.	Ab1g16957	.	.	.	.	.	.	.	.	.	.	.	.
Cs1g19670	Cc1g00746	Cx1g008640	Ci1g023370	.	Ab1g16852	.	.	.	.	.	.	.	.	.	.	.	.
Cs1g19680	Cc1g00745	Cx1g008630	Ci1g023380	.	Ab1g16917	.	.	.	.	.	.	.	.	.	.	.	.
Cs1g19690	Cc1g00744	Cx1g008620	Ci1g023400	.	Ab1g17034	.	.	.	.	.	.	.	.	.	.	.	.
Cs1g19700	Cc1g00743	Cx1g008610	Ci1g023410	Cm1g282730	Ab1g16933	Cs3g18210	Cc3g01976	Cx3g014910	Ci3g081590	Cm3g099440	Ab3g21750	.	.	.	.	.	.
Cs1g19710	Cc1g00742	Cx1g008600	Ci1g023420	.	.	.	.	.	.	.	.	.	.	.	.	.	.
Cs1g19720	Cc1g00741	Cx1g008590	Ci1g023430	Cm1g251730	.	.	.	.	.	.	.	.	.	.	.	.	.
Cs1g19730	.	.	Ci3g081720	.	.	.	.	.	.	.	.	.	.	.	.	.	.
Cs1g19740	.	.	.	.	.	.	.	.	.	.	.	.	.	.	.	.	.
Cs1g19750	.	.	.	.	.	.	.	.	.	.	.	.	.	.	.	.	.
Cs1g19760	.	Cx1g008580	Ci1g023440	Cm1g251740	Ab1g16803	.	.	.	.	.	.	.	.	.	.	.	.
Cs1g19770	.	.	Ci1g023450	.	.	.	.	.	.	.	.	.	.	.	.	.	.
Cs1g19780	Cc1g00738	Cx1g008550	.	.	Ab1g16910	.	.	.	.	.	.	.	.	.	.	.	.
Cs1g19790	Cc1g00737	Cx1g008540	Ci1g023460	.	Ab1g16793	.	.	.	.	.	.	.	.	.	.	.	.
Cs1g19800	Cc1g00736	Cx1g008530	Ci1g023470	.	Ab1g16893	.	.	.	.	.	.	.	.	.	.	.	.
Cs1g19805	.	Cx1g008520	.	.	.	.	.	.	.	.	.	.	.	.	.	.	.
Cs1g19810	Cc1g00735	.	Ci1g023480	.	Ab1g16970	.	.	.	.	.	.	.	.	.	.	.	.
Cs1g19820	Cc1g00734	Cx1g008510	Ci1g023490	.	Ab1g16999	.	.	.	.	.	.	.	.	.	.	.	.
Cs1g19830	Cc1g00733	Cx1g008500	Ci1g023500	Cm3g099240	Ab1g16932	Cs3g18030	Cc3g01955	Cx3g014730	Ci3g081790	Cm3g099240	Ab3g21746	.	.	.	.	.	.
Cs1g19840	Cc1g00732	Cx1g008490	Ci1g023510	.	Ab1g16974	.	.	.	.	.	.	.	.	.	.	.	.
Cs1g19850	.	.	.	.	.	.	.	.	.	.	.	.	.	.	.	.	.
Cs1g19860	.	.	.	.	.	.	.	.	.	.	.	.	.	.	.	.	.
Cs1g19870	Cc1g00729	Cx1g008460	Ci1g023540	.	Ab1g16749	.	.	.	.	.	.	.	.	.	.	.	.
Cs1g19880	Cc1g00728	Cx1g008450	Ci1g023550	.	Ab1g16832	.	.	.	.	.	.	.	.	.	.	.	.
Cs1g19890	.	.	.	.	.	.	.	.	.	.	.	.	.	.	.	.	.
Cs1g19900	Cc1g00725	Cx1g008430	Ci1g023580	.	Ab1g17048	.	.	.	.	.	.	.	.	.	.	.	.
Cs1g19910	.	.	.	.	.	.	.	.	.	.	.	.	.	.	.	.	.
Cs1g19920	Cc1g00722	Cx1g008410	Ci1g023600	.	Ab1g16867	Cs8g03510	Cc8g00242	Cx8g002410	.	.	Ab8g20348	.	.	.	.	.	.
Cs1g19930	Cc1g00721	Cx1g008400	Ci1g023610	.	Ab1g16742	.	.	.	.	.	.	.	.	.	.	.	.
Cs1g19935	.	Cx1g008390	Ci1g023620	.	Ab1g16774	Cs7g26110	Cc5g01154	.	Ci7g096000	.	Ab7g30001	.	.	.	.	.	.
Cs1g19940	.	.	.	.	.	.	.	.	.	.	.	.	.	.	.	.	.
Cs1g19950	Cc1g00719	Cx1g008370	Ci1g023660	Cm1g203850	Ab1g16839	Cs3g19240	Cc3g02080	Cx3g016070	.	Cm3g021630	.	.	.	.	.	.	.
Cs1g19960	Cc1g00718	Cx1g008360	Ci1g023670	.	Ab1g16929	.	.	.	.	.	.	.	.	.	.	.	.
Cs1g19970	.	.	.	.	.	.	.	.	.	.	.	.	.	.	.	.	.
Cs1g19980	Cc1g00716	Cx1g008340	Ci1g023690	.	Ab1g16752	.	.	.	.	.	.	.	.	.	.	.	.
Cs1g19990	Cc1g00715	Cx1g008330	Ci1g023700	.	Ab1g16848	.	.	.	.	.	.	.	.	.	.	.	.
Cs1g20000	Cc1g00714	Cx1g008320	Ci1g023710	Cm3g099160	Ab1g17019	Cs7g04110	Cc7g02175	Cx7g020900	Ci7g015330	Cm7g115910	Ab7g15488	Cs3g17870	Cc3g01942	Cx3g014620	Ci3g081910	Cm3g099160	Ab3g21808
Cs1g20010	.	Cx1g008310	Ci1g023720	.	Ab1g16761	.	.	.	.	.	.	.	.	.	.	.	.
Cs1g20020	.	Cx1g008300	Ci1g023730	Cm1g203940	Ab1g16806	.	.	.	.	.	.	.	.	.	.	.	.
Cs1g20030	Cc1g00712	Cx1g008290	Ci1g023750	.	Ab1g16908	.	.	.	.	.	.	.	.	.	.	.	.
Cs1g20040	Cc1g00711	Cx1g008280	Ci1g023760	.	Ab1g16995	.	.	.	.	.	.	.	.	.	.	.	.
Cs1g20050	Cc1g00710	Cx1g008270	Ci1g023770	Cm3g099080	Ab1g16759	.	.	.	.	.	.	.	.	.	.	.	.
Cs1g20060	Cc1g00709	Cx1g008260	Ci1g023780	Cm3g099070	Ab1g16831	Cs3g17780	Cc3g01930	Cx3g014510	Ci3g082010	Cm3g099070	Ab3g21724	.	.	.	.	.	.
Cs1g20070	Cc1g00708	Cx1g008250	Ci1g023790	.	.	.	.	.	.	.	.	.	.	.	.	.	.
Cs1g20080	Cc1g00707	.	Ci1g023800	Cm3g114940	Ab1g10432	.	.	.	.	.	.	.	.	.	.	.	.
Cs1g20090	Cc1g00705	Cx1g008220	Ci1g023820	Cm1g204010	.	.	.	.	.	.	.	.	.	.	.	.	.
Cs1g20100	Cc1g00703	Cx1g008200	Ci1g023850	Cm3g099040	.	Cs3g17750	Cc3g01927	Cx3g014480	Ci3g082040	Cm3g099040	Ab3g21789	.	.	.	.	.	.
Cs1g20110	Cc1g00702	Cx1g008190	Ci1g023870	.	.	.	.	.	.	.	.	.	.	.	.	.	.
[truncated: 21,584 more rows]

## Sheet: Table S8
Supplementary Tables 8. Orthologous fragments in citrus and their relative with sweet orange as reference
Cs_chro	start	end	Cc_chro	start	end	Cs_chro	start	end	Cg_chro	start	end	Cs_chro	start	end	Cm_chro	start	end	Cs_chro	start	end	Ci_chro	start	end	Cs_chro	start	end	Ab_chro	start	end
Cs1g	21	73	Cc1g	2086	2132	Cs1g	16	73	Cg1g	2904	2963	Cs1g	15	2353	Cm1g	74	3252	Cs1g	1	1753	Ci1g	42	2404	Cs1g	1	1556	Ab1g	7	1844
	166	273	Cc5g	4373	4480		166	273	Cg5g	4395	4505		1969	2049	Cm3g	1819	1928		631	645	Ci7g	1945	1961		1565	1712	Ab4g	2651	2742
	276	464	Cc1g	1803	1973		276	507	Cg1g	2512	2766		2258	2688	Cm1g	262	3552		1181	1199	Ci6g	1407	1429		1728	2121	Ab1g	1990	2548
	469	507	Cc3g	692	713		516	633	Cg2g	2084	2214	Cs2g	76	1266	Cm2g	62	1602		1265	1285	Ci3g	1270	1291		2114	2208	Ab8g	260	360
	516	742	Cc4g	1124	1307		640	742	Cg4g	938	1042		681	707	Cm3g	2672	2697		1762	2546	Ci1g	2592	3538		2240	2682	Ab3g	1924	2389
	744	957	Cc3g	551	686		750	948	Cg1g	2269	2447		1267	1306	Cm4g	365	404		2276	2495	Ci3g	2783	3022		2276	2689	Ab1g	2748	3172
	996	2689	Cc1g	1	1797		996	1030	Cg5g	1227	1261		1307	2035	Cm2g	1391	2774		2406	2431	Ci2g	92	118	Cs2g	28	1723	Ab2g	145	2009
	1584	1616	Cc3g	813	840		1082	1672	Cg1g	1284	2048		1965	2004	Cm8g	954	987		2544	2689	Ci1g	3540	3679		1484	1535	Ab4g	2743	2788
Cs2g	28	741	Cc2g	2481	3198		1584	1616	Cg3g	649	677		2064	2466	Cm2g	2191	2749	Cs2g	49	1700	Ci2g	45	3408		1557	1588	Ab8g	618	640
	743	774	Cc7g	592	618		1667	2689	Cg1g	33	1111		2406	2476	Cm7g	996	1056		1707	1739	Ci1g	2466	2505		1592	3126	Ab2g	2	3428
	799	858	Cc3g	498	530	Cs2g	28	741	Cg2g	3968	4692		2480	3128	Cm2g	2775	3633		1742	2779	Ci2g	2262	3631	Cs3g	15	68	Ab3g	48	97
	898	1556	Cc2g	854	2441		743	834	Cg1g	2163	2253		2752	2843	Cm7g	757	824		2584	2613	Ci7g	2536	2556		73	115	Ab8g	1061	1088
	1557	1588	Cc8g	646	672		896	1556	Cg2g	813	3926		2984	3002	Cm4g	2193	2209		2801	2919	Ci2g	3635	3738		208	556	Ab3g	320	642
	1592	2549	Cc2g	1089	1997		1557	1590	Cg8g	693	720	Cs3g	3	246	Cm3g	10	256		2920	2966	Ci3g	1688	1742		686	726	Ab8g	1521	1562
	2583	2630	Cc3g	89	121		1592	2549	Cg2g	1049	3383		163	181	Cm5g	3765	3787		2980	3126	Ci2g	3835	4004		775	2794	Ab3g	762	2860
	2634	3132	Cc2g	411	852		2582	2616	Cg4g	527	564		226	2163	Cm3g	230	2386	Cs3g	3	875	Ci3g	7	856	Cs4g	1	2002	Ab4g	1	2643
Cs3g	5	61	Cc3g	3	90		2633	3135	Cg2g	308	811		2175	2192	Cm1g	376	391		41	74	Ci2g	869	903	Cs5g	40	1684	Ab5g	50	1669
	73	184	Cc9g	1079	1141	Cs3g	2	51	Cg2g	4698	4741		2193	2715	Cm3g	1519	2997		749	1343	Ci3g	859	1608		1134	1163	Ab7g	2536	2559
	216	516	Cc3g	110	457		105	206	Cg1g	1143	1223		2727	2788	Cm1g	270	317		1354	1405	Ci6g	2713	2753		1772	1996	Ab5g	1680	1909
	686	726	Cc8g	1405	1442		207	272	Cg4g	564	632	Cs4g	1	1903	Cm4g	14	2079		1407	1419	Ci5g	3113	3125		1999	2041	Ab1g	217	265
	759	2794	Cc3g	986	2955		284	637	Cg3g	124	505		1559	1580	Cm2g	2163	2181		1473	2794	Ci3g	1744	3274		2155	3554	Ab5g	2057	3557
Cs4g	1	1156	Cc4g	1315	2466		686	732	Cg8g	1776	1819		1857	1936	Cm1g	2313	2381	Cs4g	9	377	Ci4g	79	505	Cs6g	1	1141	Ab6g	21	1066
	1179	1213	Cc9g	2253	2283		744	1193	Cg3g	756	1257	Cs5g	3	455	Cm5g	11	567		387	426	Ci2g	2442	2476		446	863	Ab8g	406	2194
	1214	2009	Cc4g	294	973		1206	1232	Cg2g	3006	3035		295	343	Cm7g	275	343		428	1111	Ci4g	507	1230		826	941	Ab7g	2851	2958
Cs5g	3	2800	Cc5g	2	3246		1252	1273	Cg3g	1118	1146		458	1223	Cm5g	641	1955		1195	1213	Ci2g	480	495		1187	2200	Ab6g	1271	2401
	2812	2887	Cc8g	512	586		1274	1566	Cg2g	3047	3322		727	759	Cm6g	1879	1901		1214	1455	Ci4g	1303	1595	Cs7g	5	452	Ab7g	4	993
	2888	3408	Cc5g	3299	3800		1555	2794	Cg3g	1262	2589		834	944	Cm3g	306	388		1515	1546	Ci7g	53	85		456	536	Ab1g	2229	2316
	3421	3458	Cc8g	479	514	Cs4g	1	1025	Cg4g	1203	2499		1263	3459	Cm5g	1558	4109		1549	1580	Ci4g	1725	1751		597	1665	Ab7g	129	1536
	3460	3502	Cc5g	3259	3298		984	1174	Cg2g	2253	2495		3248	3391	Cm9g	311	507		1600	1625	Ci6g	448	486		1701	1780	Ab8g	1565	1596
	3513	3554	Cc9g	835	864		1179	1213	Cg9g	2874	2906		3460	3554	Cm5g	1447	3504		1645	1709	Ci5g	88	161		1788	3228	Ab7g	1567	3157
Cs6g	6	31	Cc6g	9	23		1214	1269	Cg5g	1682	1738	Cs6g	14	2200	Cm6g	20	2634		1713	1949	Ci4g	1828	2080	Cs8g	2	966	Ab8g	1	969
	47	79	Cc8g	1117	1140		1279	1354	Cg4g	905	1521	Cs7g	11	1301	Cm7g	6	1442		1950	2000	Ci7g	643	698		1201	1238	Ab3g	224	262
	87	1142	Cc6g	43	1116		1478	1496	Cg5g	1662	1681		692	933	Cm5g	460	1949	Cs5g	3	1223	Ci5g	1	1379		1252	2067	Ab8g	1306	2219
	1145	1223	Cc8g	1258	1332		1510	1551	Cg9g	1915	1962		1376	3228	Cm7g	1443	3425		812	985	Ci1g	392	523		1746	1798	Ab7g	2756	2813
	1226	2200	Cc6g	1222	2182		1552	1580	Cg1g	1237	1267		2440	2453	Cm5g	1365	1379		1060	1080	Ci3g	1665	1686	Cs9g	5	1833	Ab9g	4	1875
Cs7g	44	383	Cc7g	2106	2448		1602	2005	Cg4g	294	857		2827	2860	Cm8g	2018	2054		1081	1114	Ci2g	3739	3776		1731	1760	Ab4g	1529	1551
	386	691	Cc4g	2	291	Cs5g	1	1163	Cg5g	1	1188		3069	3199	Cm6g	824	1019		1128	1190	Ci7g	123	876		1838	1897	Ab9g	1741	1811
	692	1693	Cc7g	1144	2104		1164	1187	Cg7g	850	874	Cs8g	17	2052	Cm8g	28	2359		1244	3165	Ci5g	1428	4005
	1699	1780	Cc8g	1443	1493		1198	1292	Cg5g	1527	2217		1986	2007	Cm6g	1994	2019		3111	3155	Ci9g	625	725
	1810	1959	Cc7g	997	1117		1297	1369	Cg7g	768	840	Cs9g	1	936	Cm9g	8	963		3173	3545	Ci5g	3557	4105
	1961	1991	Cc2g	113	137		1467	1578	Cg5g	1741	1990		443	555	Cm5g	3794	3860	Cs6g	46	515	Ci6g	116	1366
	2018	2247	Cc7g	700	948		1579	1613	Cg8g	1698	1725		556	575	Cm1g	30	50		516	557	Ci7g	1830	1864
	2250	2373	Cc2g	80	185		1620	1814	Cg5g	2068	2555		762	774	Cm4g	1413	1425		562	1093	Ci6g	2	1281
	2388	2453	Cc7g	642	699		1824	1982	Cg4g	1525	1672		830	864	Cm5g	1402	1446		643	786	Ci8g	2164	2267
	2462	2502	Cc4g	1086	1117		1906	2045	Cg5g	2129	2344		944	1062	Cm9g	1005	1244		706	800	Ci7g	3539	3596
	2511	2527	Cc7g	625	641		2048	2085	Cg2g	1611	1661		1071	1094	Cm2g	2245	2270		1102	2200	Ci6g	1374	2711
	2528	2677	Cc5g	1124	2538		2154	2799	Cg5g	2364	3255		1161	1653	Cm9g	1252	1726	Cs7g	8	494	Ci7g	17	641
	2678	3228	Cc7g	1	535		2814	2887	Cg8g	545	616		1536	1645	Cm5g	855	960		495	584	Ci8g	1997	2083
Cs8g	2	970	Cc8g	1	1016		2888	3408	Cg5g	3305	3813		1659	1897	Cm9g	1732	1932		519	805	Ci7g	700	1016
	869	883	Cc5g	2435	2447		3411	3458	Cg8g	489	545								808	881	Ci5g	575	668
	974	1032	Cc9g	1150	1192		3460	3502	Cg5g	3266	3304								889	1439	Ci7g	1120	2732
	1201	1254	Cc5g	2557	2617		3512	3554	Cg9g	971	1014								1444	1465	Ci2g	3788	3808
	1259	2067	Cc8g	1147	2059	Cs6g	6	130	Cg5g	1287	1415								1479	2869	Ci7g	86	3223
Cs9g	1	143	Cc9g	1	138		140	1134	Cg6g	7	1218								2775	2860	Ci8g	1856	1912
	189	261	Cc2g	1	72		1155	1223	Cg8g	1270	1351								2870	3221	Ci7g	3241	3603
	264	1094	Cc9g	182	1320		1226	2180	Cg6g	1331	2585							Cs8g	2	547	Ci8g	2	561
	1117	1145	Cc3g	1152	1169		2184	2200	Cg8g	1417	1429								198	370	Ci3g	1812	1915
	1226	1898	Cc9g	1593	2250	Cs7g	5	383	Cg7g	2025	2404								333	439	Ci1g	3041	3135
							386	691	Cg4g	1	295								440	1393	Ci8g	510	1389
							692	1442	Cg7g	1282	2021								909	941	Ci5g	3418	3438
							1444	1614	Cg6g	765	910								1215	1235	Ci8g	732	758
							1626	1665	Cg5g	2702	2742								1402	1430	Ci6g	1488	1518
							1699	1780	Cg8g	1825	1870								1447	2060	Ci8g	1462	2332
							1787	1959	Cg7g	1071	1237							Cs9g	15	1048	Ci9g	22	1183
							1961	1979	Cg5g	1504	1523								708	736	Ci7g	3607	3637
							1985	2031	Cg7g	942	974								1161	1728	Ci9g	1312	1922
							2039	2109	Cg2g	3438	3518								1730	1762	Ci4g	14	38
							2110	2133	Cg7g	743	764								1748	1898	Ci9g	1922	2049
							2157	2180	Cg6g	2444	2465
							2250	2295	Cg4g	1428	1474
							2297	2358	Cg5g	1418	1460
							2388	2453	Cg7g	672	738
							2469	2502	Cg4g	1056	1083
							2513	2527	Cg7g	655	671
							2528	2677	Cg5g	1188	2280
							2678	3228	Cg7g	1	654
						Cs8g	2	699	Cg8g	4	962
							869	885	Cg7g	875	890
							911	966	Cg1g	1911	1958
							981	1032	Cg5g	2450	2500
							1050	1192	Cg9g	1082	2464
							1201	2067	Cg8g	999	2502
						Cs9g	1	144	Cg9g	1	141
							189	261	Cg2g	6	80
							264	1897	Cg9g	185	2871
